# Supplementary material for: The Swine Plasma Metabolome Chronicles "Many Days" Biological Timing and Functions Linked to Growth
Source: PLoS One. 2016 Jan 6;11(1):e0145919. doi: 10.1371/journal.pone.0145919 (PMC4703299; doi:10.1371/journal.pone.0145919)
Supplement: S1 Table — (XLSX) [file pone.0145919.s008.xlsx]

## Sheet: S1_Table
Table S1: Animal husbandry and study details
								Trial 1 start d =	2011-04-24
			Gilt			Gilt	Gilt	Trial 2 start d =	2011-05-15			Dam					Enamel
	Gilt	Diet	Birth	Gilt	Gilt	Birth	Age, d	Date	Gilt	Gilt	Gilt	Birth	Dam	Dam	Dam	Dam	Multidien	Tooth
Trial	Experiment ID	Trt	Yr	Pig ID	Sex	Litter No	Trial day 0	Bred	Birth Date*	Birth Wt., kg	Wean Date	SowYear	Sow ID	Litter	Boar ID	Boar litter	Rhythm (d)	Type
1	1	1	10	1313	F	131	149	2010-08-02	2010-11-26	1.92	2010-12-23	6	5414	541	7230	723	5	1st Molar
1	2	2	10	1366	F	136	149	2010-08-02	2010-11-26	na	2010-12-23	7	5117	511	7230	723	5	1st Molar
1	withdrawn 3	1	10	1352	F	135	149	2010-08-02	2010-11-26	1.65	2010-12-23	7	5994	599	7230	723
1	4	2	10	1254	F	125	149	2010-08-02	2010-11-26	1.46	2010-12-23	8	5529	552	7230	723	5	1st Molar
1	5	1	10	1363	F	136	149	2010-08-02	2010-11-26	1.54	2010-12-23	7	5117	511	7230	723	5	1st Molar
1	6	2	10	1302	F	130	149	2010-08-02	2010-11-26	1.46	2010-12-23	8	5532	553	7230	723	5	1st Molar
1	7	1	10	1354	F	135	149	2010-08-02	2010-11-26	1.17	2010-12-23	7	5994	599	7230	723
1	8	2	10	1364	F	136	149	2010-08-02	2010-11-26	1.04	2010-12-23	7	5117	511	7230	723	5	1st Molar
1	9	1	10	1565	F	156	149	2010-08-02	2010-11-26	1.26	2010-12-23	8	5495	549	7230	723
1	10	2	10	1251	F	125	149	2010-08-02	2010-11-26	1.5	2010-12-23	8	5529	552	7230	723	5	1st Molar
1	11	1	10	1351	F	135	149	2010-08-02	2010-11-26	1.77	2010-12-23	7	5994	599	7230	723
1	12	2	10	1241	F	124	149	2010-08-02	2010-11-26	1.42	2010-12-23	8	5513	551	7230	723	5	1st Molar
1	withdrawn 13	1	10	1563	F	156	149	2010-08-02	2010-11-26	1.05	2010-12-23	8	5495	549	7230	723
1	14	2	10	1343	F	134	149	2010-08-02	2010-11-26	1.27	2010-12-23	7	5004	500	7230	723
1	withdrawn 15	1	10	1566	F	156	149	2010-08-02	2010-11-26	1.04	2010-12-23	8	5495	549	7230	723
1	16	2	10	1253	F	125	149	2010-08-02	2010-11-26	1.04	2010-12-23	8	5529	552	7230	723
2	17	1	11	41	F	4	134	2010-09-07	2011-01-01	1.18	2011-01-27	7	5072	507	7230	723	5	1st Molar
2	18	2	11	65	F	6	134	2010-09-06	2011-01-01	1.33	2011-01-27	6	5552	555	7230	723
2	19	1	11	43	F	4	134	2010-09-07	2011-01-01	1.69	2011-01-27	7	5072	507	7230	723
2	20	2	10	1422	F	142	136	2010-09-07	2010-12-30	1.91	2011-01-27	9	5043	504	7230	723	5	1st Molar
2	21	1	10	1425	F	142	136	2010-09-07	2010-12-30	1.73	2011-01-27	9	5043	504	7230	723
2	22	2	11	76	F	7	132	2010-09-09	2011-01-03	1.47	2011-01-27	9	5722	572	7230	723	5	1st Molar
2	23	1	11	35	F	3	134	2010-09-06	2011-01-01	1.92	2011-01-27	7	5762	576	7230	723	5	1st Molar
2	24	2	10	1442	F	144	135	2010-09-06	2010-12-31	1.59	2011-01-27	8	5225	522	7230	723	5	1st Molar
2	25	1	10	1421	F	142	136	2010-09-07	2010-12-30	2.34	2011-01-27	9	5043	504	7230	723
2	26	2	11	72	F	7	132	2010-09-09	2011-01-03	1.39	2011-01-27	9	5722	572	7230	723		1st Molar
2	27	1	10	1409	F	140	135	2010-09-07	2010-12-31	1.79	2011-01-27	8	5693	569	7230	723
2	28	2	11	77	F	7	132	2010-09-09	2011-01-03	1.94	2011-01-27	9	5722	572	7230	723
2	29	1	11	46	F	4	134	2010-09-07	2011-01-01	1.31	2011-01-27	7	5072	507	7230	723	5	1st Molar
2	30	2	11	53	F	5	134	2010-09-07	2011-01-01	1.07	2011-01-27	9	5007	500	7230	723
2	31	1	10	1408	F	140	135	2010-09-07	2010-12-31	1.5	2011-01-27	8	5693	569	7230	723	5	4th Decid Premolar
2	32	2	10	1391	F	139	136	2010-09-06	2010-12-30	1.63	2011-01-27	8	5524	552	7230	723	5	1st Molar
2	33	1	11	62	F	6	134	2010-09-06	2011-01-01	1.05	2011-01-27	6	5552	555	7230	723	5	1st Molar
2	34	2	10	1431	F	143	136	2010-09-07	2010-12-30	2.19	2011-01-27	9	5003	500	7230	723
2	35	1	11	73	F	7	132	2010-09-09	2011-01-03	1.78	2011-01-27	9	5722	572	7230	723
2	36	2	10	1423	F	142	136	2010-09-07	2010-12-30	1.09	2011-01-27	9	5043	540	7230	723	5	1st Molar
