# Supplementary material for: The Swine Plasma Metabolome Chronicles "Many Days" Biological Timing and Functions Linked to Growth
Source: PLoS One. 2016 Jan 6;11(1):e0145919. doi: 10.1371/journal.pone.0145919 (PMC4703299; doi:10.1371/journal.pone.0145919)
Supplement: S2 Table — Cosinor results are provided for metabolites having circadian rhythms for days 1–2. (XLSX) [file pone.0145919.s009.xlsx]

## Sheet: S2_Table
Table S2: Metabolites of high analytical grade. Cosinor results are provided for 108 (from 159) identified metabolites having 24 hr rhythms for days 1-2
Metabolite	Outlier pigs removed (#12 from all)	Mesor (+/- SD)	Amplitude	Acrophase	pvalue	pr%	Time in decimal hundred hours of peak concentration
1,5Anhydrosorbitol
14Methylhexadecanoic acid		1.317 +/-0.115	0.145	268.1	8.3885e-07	30.8	17.8733
1Hydroxy2amino(cis,trans)3,5octadecadiene (from sphingolipids)
2Aminoadipinic acid		0.505 +/-0.170	0.112	283.6	0.0012867	22.3	18.9067
2Hydroxybutyrate
3Hydroxybutyrate	6	0.482 +/-0.058	0.026	246.9	0.03504	16.3	16.46
3Hydroxyisobutyrate		0.965 +/-0.061	0.123	257.9	1.0555e-06	21.3	17.1933
3Indoxylsulfate		1.033 +/-0.153	0.152	346.6	0.0012562	12.3	23.1067
3OMethylsphingosine (d18:1) (additional: Sphingolipids, erythroSphingosine (d18:1), threoSphingosine (d18:1))
4Hydroxyphenylpyruvate		1.284 +/-0.102	0.265	257	2.9673e-12	30.2	17.1333
5OMethylsphingosine (d18:1) (additional: Sphingolipids, erythroSphingosine (d18:1), threoSphingosine (d18:1))		0.779 +/-0.049	0.022	179	0.036503	10	11.9333
5Oxoproline (additional: Folic acid, Glutamate, Glutamine)		1.002 +/-0.049	0.023	261.8	0.0069025	11.3	17.4533
Alanine		1.064 +/-0.073	0.102	240.3	1.0016e-05	28.4	16.02
alphaKetoglutarate		1.117 +/-0.116	0.078	77	1.4057e-06	15	5.13333
alphaTocopherol
Arachidonic acid (C20:cis[5,8,11,14]4)		1.024 +/-0.094	0.042	74.9	0.0013056	14.7	4.99333
Arginine		1.198 +/-0.061	0.14	264.7	6.3192e-09	27.9	17.6467
Ascorbic acid (additional: Glucose)		1.005 +/-0.022	0.028	350	0.012613	13.6	23.3333
Asparagine		1.183 +/-0.076	0.241	236.6	1.0016e-08	36	15.7733
Behenic acid (C22:0)		0.906 +/-0.048	0.023	194.7	0.0058042	11.8	12.98
Campesterol
Ceramide (d18:1,C24:0)	31	0.899 +/-0.067	0.09	295.5	0.010845	19.4	19.7
Cerotic acid (C26:0)
Cholesterol, free
Cholesterol, total		0.941 +/-0.046	0.019	75.9	0.0061367	8.5	5.06
Cholesterylester C16:0		0.942 +/-0.060	0.135	108.4	4.5296e-06	20.4	7.22667
Cholesterylester C16:1		0.984 +/-0.057	0.058	83.3	0.031686	9.2	5.55333
Cholesterylester C18:1		0.860 +/-0.075	0.181	108.5	1.1395e-06	33.7	7.23333
Cholesterylester C18:2		1.000 +/-0.079	0.147	100	2.2146e-05	28.8	6.66667
Cholesterylester C20:4		0.909 +/-0.062	0.12	95.6	5.2836e-06	26.7	6.37333
Choline plasmalogen (C18,C20:4)		0.937 +/-0.057	0.042	121.3	0.00020026	13.2	8.08667
Citrate		1.247 +/-0.113	0.036	179.3	0.02504	16.6	11.9533
Citrulline		1.175 +/-0.082	0.105	278.9	5.1419e-08	26.7	18.5933
Coenzyme Q10	6	0.843 +/-0.045	0.07	118.5	1.526e-06	16.5	7.9
Cortisol		0.962 +/-0.078	0.344	86.1	4.1272e-11	28.5	5.74
Creatine		1.049 +/-0.076	0.114	301.6	9.3229e-06	24.9	20.1067
Creatinine		0940 +/-0.041	0.034	346.2	0.017402	12.1	23.08
Cresol sulfate
Cysteine (additional: Cystine)		1.126 +/-0.024	0.049	294.6	0.00092392	15.9	19.64
Cystine		1.015 +/-0.056	0.049	351.6	0.0055066	14.9	23.44
DAG (C18:1,C18:2)		0.753 +/-0.053	0.089	290.7	0.017506	24.9	19.38
Docosapentaenoic acid (C22:cis[7,10,13,16,19]5)		0.987 +/-0.092	0.041	57.5	0.0028909	12.4	3.83333
Docosatetraenoic acid (C22:cis[7,10,13,16]4)
Eicosanoic acid (C20:0)		0.745 +/-0.050	0.019	228.3	0.00035513	10.9	15.22
Elaidic acid (C18:trans[9]1)
erythroDihydrosphingosine (d18:0)		0.624 +/-0.048	0.022	241.6	0.021771	10.1	16.1067
Erythrol		1.116 +/-0.063	0.101	331.5	1.1036e-08	23.8	22.1
erythroSphingosine (d16:0)
erythroSphingosine (d18:1) (additional: Sphingolipids)		0.775 +/-0.043	0.023	176	0.0049762	12.2	11.7333
Fumarate
Galactose, lipid fraction
Galacturonic acid
gammaAminobutyrate (GABA)
gammaLinolenic acid (C18:cis[6,9,12]3)
gammaTocopherol (additional: 2,3Dimethyl5phytylquinol, betaTocopherol)	28	1.234 +/-0.144	0.15	276.6	6.799e-06	19.4	18.44
Glucosamine
Glucose		0.970 +/-0.019	0.017	7.7	0.047324	15	0.513333
Glucose1phosphate (additional: Glucose)
Glucuronic acid		1.118 +/-0.063	0.068	212.4	2.0713e-06	16.3	14.16
Glutamate		0.806 +/-0.047	0.034	327.9	0.0044429	13.6	21.86
Glutamine
Glycerol phosphate, lipid fraction		1.176 +/-0.150	0.066	298.1	0.042336	17.5	19.8733
Glycerol, lipid fraction		1.202 +/-0.115	0.176	277	0.00014281	31.8	18.4667
Glycerol3phosphate, polar fraction		0.607 +/-0.097	0.033	1.2	0.026636	14.1	0.08
Glycine		1.067 +/-0.053	0.04	49.9	0.00022004	25.2	3.32667
Glycochenodeoxycholic acid (additional: Glycodeoxycholic acid)
Glycolate		1.051 +/-0.032	0.073	47	0.0016528	9.8	3.13333
Hentriacontane
Heptadecanoic acid (C17:0)		1.272 +/-0.135	0.124	301.2	1.0813e-05	34.6	20.08
Hippuric acid		1.118 +/-0.115	0.144	312.5	0.00010469	16.6	20.8333
Histidine		1.099 +/-0.049	0.073	222.8	3.1788e-05	20.9	14.8533
Hypoxanthine (additional: Inosine)		0.853 +/-0.060	0.047	227.6	0.0011792	16.2	15.1733
Indole3lactic acid		0.944 +/-0.037	0.085	275.6	2.2805e-10	20.4	18.3733
Isocitrate
Isoleucine		0.933 +/-0.046	0.108	258.6	2.5753e-07	27.5	17.24
Ketoleucine		0.991 +/-0.032	0.081	185.9	1.3339e-08	17.6	12.3933
Lactaldehyde
Lactate		1.020 +/-0.040	0.077	230.2	0.0003007	18.4	15.3467
Leucine		0.987 +/-0.037	0.085	269.6	1.936e-07	29	17.9733
Lignoceric acid (C24:0)
Linoleic acid (C18:cis[9,12]2)		1.085 +/-0.084	0.057	274.4	0.00030348	23.3	18.2933
Lysine		0.914 +/-0.074	0.143	235.9	7.427e-08	30.6	15.7267
Lysophosphatidylcholine (C16:0)
Lysophosphatidylcholine (C17:0)
Lysophosphatidylcholine (C18:0)
Lysophosphatidylcholine (C18:1)
Lysophosphatidylcholine (C18:2)		1.106 +/-0.062	0.063	285.5	0.0022804	12.8	19.0333
Lysophosphatidylcholine (C20:4)
Mannosamine
Mannose		0.474 +/-0.083	0.094	59	0.0010746	28.6	3.93333
Methionine		0.962 +/-0.067	0.079	275.1	9.9993e-07	28.1	18.34
myoInositol		1.069 +/-0.062	0.061	204	0.0012596	24.8	13.6
myoInositol, lipid fraction
myoInositol2phosphate, lipid fraction (myoInositolphospholipids)
Myristic acid (C14:0)		1.133 +/-0.103	0.184	274.7	2.4078e-05	33.5	18.3133
N,NDimethylarginine (ADMA)		1.152 +/-0.052	0.058	352.5	0.0031111	11.5	23.5
Nervonic acid (C24:cis[15]1)		0.828 +/-0.051	0.017	185.2	0.043385	14.9	12.3467
Nicotinamide		0.971 +/-0.042	0.133	107.4	1.5417e-10	27.8	7.16
Octadecanol
Oleic acid (C18:cis[9]1)		0.997 +/-0.061	0.04	292.6	0.032233	23	19.5067
OPhosphoethanolamine
Ornithine (additional: Arginine, Citrulline)		1.128 +/-0.056	0.099	290.2	5.6473e-09	28.9	19.3467
Palmitic acid (C16:0)		1.057 +/-0.072	0.08	294.1	0.00021904	29.7	19.6067
Palmitoleic acid (C16:cis[9]1)		0.961 +/-0.064	0.042	303.4	0.039508	19.7	20.2267
Pantothenic acid		1.167 +/-0.110	0.072	159.1	0.00045061	16.9	10.6067
Pentadecanol		1.086 +/-0.047	0.091	277.4	5.6522e-05	22.5	18.4933
Phenylalanine		0.981 +/-0.033	0.134	256.2	1.2657e-11	41.5	17.08
Phosphate, lipid fraction	33	1.055 +/-0.070	0.025	355.2	0.041519	13.5	23.68
Phosphatidylcholine (C16:0,C16:0)		1.077 +/-0.044	0.033	295.4	0.0029466	12.2	19.6933
Phosphatidylcholine (C16:0,C18:2)
Phosphatidylcholine (C16:0,C20:4) (additional: Phosphatidylcholine (C18:2,C18:2))
Phosphatidylcholine (C16:0,C20:5)
Phosphatidylcholine (C16:0,C22:6) (additional: Phosphatidylcholine (C18:2,C20:4))		1.013 +/-0.065	0.035	50.4	0.016661	13.3	3.36
Phosphatidylcholine (C16:1,C18:2)		1.069 +/-0.068	0.047	279.9	0.041164	20.4	18.66
Phosphatidylcholine (C18:0,C18:1)
Phosphatidylcholine (C18:0,C18:2)
Phosphatidylcholine (C18:0,C20:3) (additional: Phosphatidylcholine (C20:1,C18:2), Phosphatidylcholine (C20:2,C18:1))		0.962 +/-0.026	0.022	119.1	0.0062423	10.6	7.94
Phosphatidylcholine (C18:0,C20:4)
Phosphatidylcholine (C18:0,C22:6)		1.019 +/-0.126	0.055	91.3	0.00030464	15	6.08667
Phosphatidylcholine (C18:1,C18:2) (additional: Phosphatidylcholine (C16:0,C20:3))		0.968 +/-0.013	0.014	81.1	0.029167	8.6	5.40667
Phosphatidylcholine No 02		0.988 +/-0.048	0.046	82.1	0.00050485	11	5.47333
Phytosphingosine (t18:0), total		0.945 +/-0.073	0.041	256.9	0.0069861	11.9	17.1267
Pinitol		1.323 +/-0.102	0.336	270.9	8.6597e-14	52.6	18.06
Proline		1.088 +/-0.058	0.128	262.1	4.1605e-09	38.1	17.4733
Pseudouridine		1.064 +/-0.033	0.043	329.8	2.8977e-06	18.4	21.9867
Pyruvate (additional: Phosphoenolpyruvate (PEP))
Sarcosine		1.026 +/-0.024	0.045	103.7	0.00033114	11.8	6.91333
scylloInositol		0.949 +/-0.059	0.042	195.1	0.0019567	19.1	13.0067
Serine		1.091 +/-0.066	0.098	245.5	1.1561e-06	27.1	16.3667
Serine, lipid fraction
Sorbitol (additional: Galactitol, Mannitol)		1.139 +/-0.209	0.622	359.7	1.1014e-08	49.7	23.98
Sphingomyelin (d18:1,C16:0)
Sphingomyelin (d18:1,C24:0)
Sphingomyelin (d18:2,C16:0)		0.966 +/-0.032	0.026	110.2	0.049379	9.2	7.34667
Sphingomyelin (d18:2,C18:0)		0.791 +/-0.041	0.024	125.1	0.021758	11.6	8.34
Stearic acid (C18:0)
Succinate
Sucrose
TAG (C16:0,C16:1)		1.162 +/-0.107	0.226	279.7	7.8412e-05	33.5	18.6467
TAG (C16:0,C18:1,C18:3) (additional: TAG (C16:0,C18:2,C18:2), TAG (C16:1,C18:1,C18:2))		1.189 +/-0.124	0.16	267.7	0.0036725	21.9	17.8467
TAG (C16:0,C18:2)		1.046 +/-0.074	0.117	283.8	6.6823e-05	22.7	18.92
TAG (C18:1,C18:2)		1.103 +/-0.083	0.118	269.5	0.00034393	21.9	17.9667
TAG (C18:2,C18:2)		1.170 +/-0.107	0.137	267.4	0.00024494	20.1	17.8267
TAG (C18:2,C18:3)		1.251 +/-0.186	0.172	236.5	0.013959	24.3	15.7667
TAG (C16:0,C18:1,C18:2)		1.248 +/-0.124	0.239	272	0.00044381	28.2	18.1333
Taurine
Taurochenodeoxycholic acid (additional: Taurodeoxycholic acid)
Tetradecanol
Threonic acid		0.924 +/-0.048	0.062	155.8	5.6672e-09	20.3	10.3867
Threonine		1.010 +/-0.044	0.088	272.1	2.4126e-08	29.9	18.14
threoSphingosine (d18:1) (additional: Sphingolipids)		0.814 +/-0.059	0.02	179.4	0.017651	12.6	11.96
trans4Hydroxyproline		1.158 +/-0.087	0.085	45.2	5.2852e-10	31.6	3.01333
Tricosanoic acid (C23:0)		0.966 +/-0.052	0.028	197.7	0.032674	11.3	13.18
Tryptophan		0.919 +/-0.041	0.086	268.7	4.8341e-10	30.3	17.9133
Tyrosine		1.167 +/-0.055	0.155	273.1	9.9782e-11	40.4	18.2067
Urea		1000 +/-0.078	0.077	312.8	8.7437e-08	7.3	20.8533
Uric acid		1.046 +/-0.055	0.121	306.9	0.0005258	13.7	20.46
Uridine		1.039 +/-0.045	0.058	144.1	0.0006479	12.3	9.60667
Valine		0.855 +/-0.036	0.052	274.1	5.7365e-06	26.4	18.2733
