# Supplementary material for: The Swine Plasma Metabolome Chronicles "Many Days" Biological Timing and Functions Linked to Growth
Source: PLoS One. 2016 Jan 6;11(1):e0145919. doi: 10.1371/journal.pone.0145919 (PMC4703299; doi:10.1371/journal.pone.0145919)
Supplement: S3 Table — (XLSX) [file pone.0145919.s010.xlsx]

## Sheet: S3_Table
Table S3: Cosinor results are provided for circadian rhythms of 34 (from 39) amino acid and related metabolite concentrations for days 1-2
Metabolite	Mesor (+/- SD)	Amplitude	Acrophase	pvalue	pr%	Time in decimal hundred hours of peak concentration	Ontology
2Aminoadipinic acid	0.505 +/-0.170	0.112	283.6	0.0012867	22.3	18.9067	Amino acid metabolites
2Hydroxybutyrate							Amino acid metabolites
3Hydroxyisobutyrate	0.482 +/-0.058	0.026	246.9	0.03504	16.3	16.46	Amino acid metabolites
5Oxoproline (additional: Folic acid, Glutamate, Glutamine)	1.002 +/-0.049	0.023	261.8	0.0069025	11.3	17.4533	Amino acid metabolites
Ketoleucine	0.991 +/-0.032	0.081	185.9	1.3339e-08	17.6	12.3933	Amino acid metabolites
Glutamate	0.806 +/-0.047	0.034	327.9	0.0044429	13.6	21.86	Amino acids, acidic
Phenylalanine	0.981 +/-0.033	0.134	256.2	1.2657e-11	41.5	17.08	Amino acids, aromatic
Tryptophan	0.919 +/-0.041	0.086	268.7	4.8341e-10	30.3	17.9133	Amino acids, aromatic
Tyrosine	1.167 +/-0.055	0.155	273.1	9.9782e-11	40.4	18.2067	Amino acids, aromatic
Arginine	1.198 +/-0.061	0.14	264.7	6.3192e-09	27.9	17.6467	Amino acids, basic
Asparagine	1.183 +/-0.076	0.241	236.6	1.0016e-08	36	15.7733	Amino acids, basic
Glutamine							Amino acids, basic
Histidine	1.099 +/-0.049	0.073	222.8	3.1788e-05	20.9	14.8533	Amino acids, basic
Lysine	0.914 +/-0.074	0.143	235.9	7.427e-08	30.6	15.7267	Amino acids, basic
Isoleucine	0.933 +/-0.046	0.108	258.6	2.5753e-07	27.5	17.24	Amino acids, branched chain
Leucine	0.987 +/-0.037	0.085	269.6	1.936e-07	29	17.9733	Amino acids, branched chain
Valine	0.855 +/-0.036	0.052	274.1	5.7365e-06	26.4	18.2733	Amino acids, branched chain
Alanine	1.064 +/-0.073	0.102	240.3	1.0016e-05	28.4	16.02	Amino acids, neutral
Serine	1.091 +/-0.066	0.098	245.5	1.1561e-06	27.1	16.3667	Amino acids, neutral
Serine, lipid fraction							Miscellaneous
Threonine	1.010 +/-0.044	0.088	272.1	2.4126e-08	29.9	18.14	Amino acids, neutral
Glycine	1.067 +/-0.053	0.04	49.9	0.00022004	25.2	3.32667	Amino acids, neutral
Proline	1.088 +/-0.058	0.128	262.1	4.1605e-09	38.1	17.4733	Amino acids, neutral
trans4Hydroxyproline	1.158 +/-0.087	0.085	45.2	5.2852e-10	31.6	3.01333	Collagen metabolism
Cysteine (additional: Cystine)	1.126 +/-0.024	0.049	294.6	0.00092392	15.9	19.64	Amino acids, Scontaining
Cystine	1.015 +/-0.056	0.049	351.6	0.0055066	14.9	23.44	Amino acids, Scontaining
Methionine	0.962 +/-0.067	0.079	275.1	9.9993e-07	28.1	18.34	Amino acids, Scontaining
Taurine							Amino acids, Scontaining
Citrulline	1.175 +/-0.082	0.105	278.9	5.1419e-08	26.7	18.5933	Urea cycle and related
Ornithine (additional: Arginine, Citrulline)	1.128 +/-0.056	0.099	290.2	5.6473e-09	28.9	19.3467	Urea cycle and related
Urea	1000 +/-0.078	0.077	312.8	8.7437e-08	7.3	20.8533	Urea cycle and related
Hippuric acid	1.118 +/-0.115	0.144	312.5	0.00010469	16.6	20.8333	urinary metabolite
4Hydroxyphenylpyruvate	1.284 +/-0.102	0.265	257	2.9673e-12	30.2	17.1333	Tyrosine metabolism
Cresol sulfate							Tyrosine metabolism
Creatinine	0940 +/-0.041	0.034	346.2	0.017402	12.1	23.08	Creatine metabolism
Creatine	1.049 +/-0.076	0.114	301.6	9.3229e-06	24.9	20.1067	Creatine metabolism
Sarcosine	1.026 +/-0.024	0.045	103.7	0.00033114	11.8	6.91333	Methyl cycle
Indole3lactic acid	0.944 +/-0.037	0.085	275.6	2.2805e-10	20.4	18.3733	Tryptophan metabolism
3Indoxylsulfate	1.033 +/-0.153	0.152	346.6	0.0012562	12.3	23.1067	Tryptophan metabolism
