# Supplementary material for: The Swine Plasma Metabolome Chronicles "Many Days" Biological Timing and Functions Linked to Growth
Source: PLoS One. 2016 Jan 6;11(1):e0145919. doi: 10.1371/journal.pone.0145919 (PMC4703299; doi:10.1371/journal.pone.0145919)
Supplement: S4 Table — (XLSX) [file pone.0145919.s011.xlsx]

## Sheet: S4_Table
Table S4: Cosinor results are provided for circadian rhythms of 74 (from 120) metabolites other than amino acids and related in respect of metabolite concentrations for days 1-2
Metabolite	Mesor (+/- SD)	Amplitude	Acrophase	pvalue	pr%	Time in decimal hundred hours of peak concentration	Metabolite pathways
Coenzyme Q10	0.843 +/-0.045	0.047	110	0.0026002	8.4	7.33333	Vitamins, cofactors and related	Redoxcarrier and related
Nicotinamide	0.971 +/-0.042	0.133	107.4	1.5417e-10	27.8	7.16	Vitamins, cofactors and related	Redoxcarrier and related
gammaTocopherol (additional: 2,3Dimethyl5phytylquinol, betaTocopherol)	1.234 +/-0.144	0.15	276.6	6.799e-06	19.4	18.44	Vitamins, cofactors and related	Tocopherols and related
alphaTocopherol							Vitamins, cofactors and related	Tocopherols and related
Pantothenic acid	1.167 +/-0.110	0.072	159.1	0.00045061	16.9	10.6067	Vitamins, cofactors and related	Acylcarriers and related
Threonic acid	0.924 +/-0.048	0.062	155.8	5.6672e-09	20.3	10.3867	Vitamins, cofactors and related	Ascorbic acid and related
Ascorbic acid (additional: Glucose)	1.005 +/-0.022	0.028	350	0.012613	13.6	23.3333	Vitamins, cofactors and related	Ascorbic acid and related
Cortisol	0.962 +/-0.078	0.344	86.1	4.1272e-11	28.5	5.74	Hormones, signal substances and related	Steroids and related
gammaAminobutyrate (GABA)							Hormones, signal substances and related	Other hormones, signal substances and related
N,NDimethylarginine (ADMA)	1.152 +/-0.052	0.058	352.5	0.0031111	11.5	23.5	Hormones, signal substances and related	Other hormones, signal substances and related
Uridine	1.039 +/-0.045	0.058	144.1	0.0006479	12.3	9.60667	Nucleobases and related	Pyrimidine metabolism
Pseudouridine	1.064 +/-0.033	0.043	329.8	2.8977e-06	18.4	21.9867	Nucleobases and related	Pyrimidine metabolism
Uric acid	1.046 +/-0.055	0.121	306.9	0.0005258	13.7	20.46	Nucleobases and related	Purine metabolism
Hypoxanthine (additional: Inosine)	0.853 +/-0.060	0.047	227.6	0.0011792	16.2	15.1733	Nucleobases and related	Purine metabolism
Cholesterylester C16:0	0.942 +/-0.060	0.135	108.4	4.5296e-06	20.4	7.22667	Complex lipids, fatty acids and related	Cholesterylesters
Cholesterylester C16:1	0.984 +/-0.057	0.058	83.3	0.031686	9.2	5.55333	Complex lipids, fatty acids and related	Cholesterylesters
Cholesterylester C18:1	0.860 +/-0.075	0.181	108.5	1.1395e-06	33.7	7.23333	Complex lipids, fatty acids and related	Cholesterylesters
Cholesterylester C18:2	1.000 +/-0.079	0.147	100	2.2146e-05	28.8	6.66667	Complex lipids, fatty acids and related	Cholesterylesters
Cholesterylester C20:4	0.909 +/-0.062	0.12	95.6	5.2836e-06	26.7	6.37333	Complex lipids, fatty acids and related	Cholesterylesters
Glycerol, lipid fraction	1.202 +/-0.115	0.176	277	0.00014281	31.8	18.4667	Complex lipids, fatty acids and related	Fatty alcohols
Octadecanol							Complex lipids, fatty acids and related	Fatty alcohols
Pentadecanol	1.086 +/-0.047	0.091	277.4	5.6522e-05	22.5	18.4933	Complex lipids, fatty acids and related	Fatty alcohols
Tetradecanol							Complex lipids, fatty acids and related	Fatty alcohols
Linoleic acid (C18:cis[9,12]2)	1.085 +/-0.084	0.057	274.4	0.00030348	23.3	18.2933	Complex lipids, fatty acids and related	Fatty acids, polyunsaturated
Arachidonic acid (C20:cis[5,8,11,14]4)	1.024 +/-0.094	0.042	74.9	0.0013056	14.7	4.99333	Complex lipids, fatty acids and related	Fatty acids, polyunsaturated
gammaLinolenic acid (C18:cis[6,9,12]3)							Complex lipids, fatty acids and related	Fatty acids, polyunsaturated
Docosapentaenoic acid (C22:cis[7,10,13,16,19]5)	0.987 +/-0.092	0.041	57.5	0.0028909	12.4	3.83333	Complex lipids, fatty acids and related	Fatty acids, polyunsaturated
Docosatetraenoic acid (C22:cis[7,10,13,16]4)							Complex lipids, fatty acids and related	Fatty acids, polyunsaturated
Elaidic acid (C18:trans[9]1)							Complex lipids, fatty acids and related	Fatty acids, monounsaturated
Oleic acid (C18:cis[9]1)	0.997 +/-0.061	0.04	292.6	0.032233	23	19.5067	Complex lipids, fatty acids and related	Fatty acids, monounsaturated
Nervonic acid (C24:cis[15]1)	0.828 +/-0.051	0.017	185.2	0.043385	14.9	12.3467	Complex lipids, fatty acids and related	Fatty acids, monounsaturated
Palmitoleic acid (C16:cis[9]1)	0.961 +/-0.064	0.042	303.4	0.039508	19.7	20.2267	Complex lipids, fatty acids and related	Fatty acids, monounsaturated
Behenic acid (C22:0)	0.906 +/-0.048	0.023	194.7	0.0058042	11.8	12.98	Complex lipids, fatty acids and related	Fatty acids, saturated
Cerotic acid (C26:0)							Complex lipids, fatty acids and related	Fatty acids, saturated
Stearic acid (C18:0)							Complex lipids, fatty acids and related	Fatty acids, saturated
Palmitic acid (C16:0)	1.057 +/-0.072	0.08	294.1	0.00021904	29.7	19.6067	Complex lipids, fatty acids and related	Fatty acids, saturated
Lignoceric acid (C24:0)							Complex lipids, fatty acids and related	Fatty acids, saturated
Heptadecanoic acid (C17:0)	1.272 +/-0.135	0.124	301.2	1.0813e-05	34.6	20.08	Complex lipids, fatty acids and related	Fatty acids, saturated
Eicosanoic acid (C20:0)	0.745 +/-0.050	0.019	228.3	0.00035513	10.9	15.22	Complex lipids, fatty acids and related	Fatty acids, saturated
Myristic acid (C14:0)	1.133 +/-0.103	0.184	274.7	2.4078e-05	33.5	18.3133	Complex lipids, fatty acids and related	Fatty acids, saturated
Tricosanoic acid (C23:0)	0.966 +/-0.052	0.028	197.7	0.032674	11.3	13.18	Complex lipids, fatty acids and related	Fatty acids, saturated
14Methylhexadecanoic acid	1.317 +/-0.115	0.145	268.1	8.3885e-07	30.8	17.8733	Complex lipids, fatty acids and related	Fatty acids, branched
Cholesterol, free							Complex lipids, fatty acids and related	Cholesterol and related
Cholesterol, total	0.941 +/-0.046	0.019	75.9	0.0061367	8.5	5.06	Complex lipids, fatty acids and related	Cholesterol and related
Glycerol phosphate, lipid fraction	1.176 +/-0.150	0.066	298.1	0.042336	17.5	19.8733	Complex lipids, fatty acids and related	Phospholipid metabolites
Phosphate, lipid fraction	1.055 +/-0.070	0.025	355.2	0.041519	13.5	23.68	Complex lipids, fatty acids and related	Phospholipid metabolites
myoInositol2phosphate, lipid fraction (myoInositolphospholipids)							Complex lipids, fatty acids and related	Phospholipid metabolites
Galactose, lipid fraction							Complex lipids, fatty acids and related	Glycolipids
myoInositol, lipid fraction							Complex lipids, fatty acids and related	Glycolipids
1Hydroxy2amino(cis,trans)3,5octadecadiene (from sphingolipids)							Complex lipids, fatty acids and related	Sphingolipids
3OMethylsphingosine (d18:1) (additional: Sphingolipids, erythroSphingosine (d18:1), threoSphingosine (d18:1))							Complex lipids, fatty acids and related	Sphingolipids
erythroSphingosine (d16:0)								Sphingolipids
Phytosphingosine (t18:0), total	0.945 +/-0.073	0.041	256.9	0.0069861	11.9	17.1267	Complex lipids, fatty acids and related	Sphingolipids
erythroDihydrosphingosine (d18:0)	0.624 +/-0.048	0.022	241.6	0.021771	10.1	16.1067	Complex lipids, fatty acids and related	Sphingolipids
threoSphingosine (d18:1) (additional: Sphingolipids)	0.814 +/-0.059	0.02	179.4	0.017651	12.6	11.96	Complex lipids, fatty acids and related	Sphingolipids
5OMethylsphingosine (d18:1) (additional: Sphingolipids, erythroSphingosine (d18:1), threoSphingosine (d18:1))	0.779 +/-0.049	0.022	179	0.036503	10	11.9333	Complex lipids, fatty acids and related	Sphingolipids
erythroSphingosine (d18:1) (additional: Sphingolipids)	0.775 +/-0.043	0.023	176	0.0049762	12.2	11.7333	Complex lipids, fatty acids and related	Sphingolipids
Hentriacontane							Complex lipids, fatty acids and related	Alkane hydrocarbons
Glycerol3phosphate, polar fraction	0.607 +/-0.097	0.033	1.2	0.026636	14.1	0.08	Complex lipids, fatty acids and related	Lipid precursors
OPhosphoethanolamine							Complex lipids, fatty acids and related	Lipid precursors
Sphingomyelin (d18:1,C16:0)							Complex lipids, fatty acids and related	Sphingomyelins
Sphingomyelin (d18:1,C24:0)							Complex lipids, fatty acids and related	Sphingomyelins
Sphingomyelin (d18:2,C16:0)	0.966 +/-0.032	0.026	110.2	0.049379	9.2	7.34667	Complex lipids, fatty acids and related	Sphingomyelins
Sphingomyelin (d18:2,C18:0)	0.791 +/-0.041	0.024	125.1	0.021758	11.6	8.34	Complex lipids, fatty acids and related	Sphingomyelins
Choline plasmalogen (C18,C20:4)	0.937 +/-0.057	0.042	121.3	0.00020026	13.2	8.08667	Complex lipids, fatty acids and related	Plasmalogens
Ceramide (d18:1,C24:0)	0.899 +/-0.067	0.09	295.5	0.010845	19.4	19.7	Complex lipids, fatty acids and related	Ceramides
DAG (C18:1,C18:2)	0.753 +/-0.053	0.089	290.7	0.017506	24.9	19.38	Complex lipids, fatty acids and related	Diacylglycerols
TAG (C18:2,C18:2)	1.170 +/-0.107	0.137	267.4	0.00024494	20.1	17.8267	Complex lipids, fatty acids and related	Triacylglycerols
TAG (C16:0,C18:2)	1.046 +/-0.074	0.117	283.8	6.6823e-05	22.7	18.92	Complex lipids, fatty acids and related	Triacylglycerols
TAG (C16:0,C18:1,C18:2)	1.248 +/-0.124	0.239	272	0.00044381	28.2	18.1333	Complex lipids, fatty acids and related	Triacylglycerols
TAG (C18:1,C18:2)	1.103 +/-0.083	0.118	269.5	0.00034393	21.9	17.9667	Complex lipids, fatty acids and related	Triacylglycerols
TAG (C16:0,C16:1)	1.162 +/-0.107	0.226	279.7	7.8412e-05	33.5	18.6467	Complex lipids, fatty acids and related	Triacylglycerols
TAG (C18:2,C18:3)	1.251 +/-0.186	0.172	236.5	0.013959	24.3	15.7667	Complex lipids, fatty acids and related	Triacylglycerols
TAG (C16:0,C18:1,C18:3) (additional: TAG (C16:0,C18:2,C18:2), TAG (C16:1,C18:1,C18:2))	1.189 +/-0.124	0.16	267.7	0.0036725	21.9	17.8467	Complex lipids, fatty acids and related	Triacylglycerols
Lysophosphatidylcholine (C16:0)							Complex lipids, fatty acids and related	Lysophosphatidylcholines
Lysophosphatidylcholine (C17:0)							Complex lipids, fatty acids and related	Lysophosphatidylcholines
Lysophosphatidylcholine (C18:0)							Complex lipids, fatty acids and related	Lysophosphatidylcholines
Lysophosphatidylcholine (C18:1)							Complex lipids, fatty acids and related	Lysophosphatidylcholines
Lysophosphatidylcholine (C18:2)	1.106 +/-0.062	0.063	285.5	0.0022804	12.8	19.0333	Complex lipids, fatty acids and related	Lysophosphatidylcholines
Lysophosphatidylcholine (C20:4)							Complex lipids, fatty acids and related	Lysophosphatidylcholines
Phosphatidylcholine (C16:0,C16:0)	1.077 +/-0.044	0.033	295.4	0.0029466	12.2	19.6933	Complex lipids, fatty acids and related	Phosphatidylcholines
Phosphatidylcholine (C16:0,C18:2)							Complex lipids, fatty acids and related	Phosphatidylcholines
Phosphatidylcholine (C16:0,C20:4) (additional: Phosphatidylcholine (C18:2,C18:2))							Complex lipids, fatty acids and related	Phosphatidylcholines
Phosphatidylcholine (C16:0,C20:5)							Complex lipids, fatty acids and related	Phosphatidylcholines
Phosphatidylcholine (C16:0,C22:6) (additional: Phosphatidylcholine (C18:2,C20:4))	1.013 +/-0.065	0.035	50.4	0.016661	13.3	3.36	Complex lipids, fatty acids and related	Cholesterol and related
Phosphatidylcholine (C16:1,C18:2)	1.069 +/-0.068	0.047	279.9	0.041164	20.4	18.66	Complex lipids, fatty acids and related	Phosphatidylcholines
Phosphatidylcholine (C18:0,C18:1)							Complex lipids, fatty acids and related	Phosphatidylcholines
Phosphatidylcholine (C18:0,C18:2)							Complex lipids, fatty acids and related	Phosphatidylcholines
Phosphatidylcholine (C18:0,C20:3) (additional: Phosphatidylcholine (C20:1,C18:2), Phosphatidylcholine (C20:2,C18:1))	0.962 +/-0.026	0.022	119.1	0.0062423	10.6	7.94	Complex lipids, fatty acids and related	Phosphatidylcholines
Phosphatidylcholine (C18:0,C20:4)							Complex lipids, fatty acids and related	Phosphatidylcholines
Phosphatidylcholine (C18:0,C22:6)	1.019 +/-0.126	0.055	91.3	0.00030464	15	6.08667	Complex lipids, fatty acids and related	Phosphatidylcholines
Phosphatidylcholine (C18:1,C18:2) (additional: Phosphatidylcholine (C16:0,C20:3))	0.968 +/-0.013	0.014	81.1	0.029167	8.6	5.40667	Complex lipids, fatty acids and related	Phosphatidylcholines
Phosphatidylcholine No 02	0.988 +/-0.048	0.046	82.1	0.00050485	11	5.47333	Complex lipids, fatty acids and related	Phosphatidylcholines
Glycochenodeoxycholic acid (additional: Glycodeoxycholic acid)							Complex lipids, fatty acids and related	Bile acids
Taurochenodeoxycholic acid (additional: Taurodeoxycholic acid)							Complex lipids, fatty acids and related	Bile acids
Pyruvate (additional: Phosphoenolpyruvate (PEP))							Energy metabolism and related	Glycolysis/Gluconeogenesis
Lactate	1.020 +/-0.040	0.077	230.2	0.0003007	18.4	15.3467	Energy metabolism and related	Glycolysis/Gluconeogenesis
Lactaldehyde							Energy metabolism and related	Glycolysis/Gluconeogenesis
Citrate	1.247 +/-0.113	0.036	179.3	0.02504	16.6	11.9533	Energy metabolism and related	Citrate cycle
alphaKetoglutarate	1.117 +/-0.116	0.078	77	1.4057e-06	15	5.13333	Energy metabolism and related	Citrate cycle
Fumarate							Energy metabolism and related	Citrate cycle
Isocitrate							Energy metabolism and related	Citrate cycle
Succinate							Energy metabolism and related	Citrate cycle
3Hydroxybutyrate	0.482 +/-0.058	0.026	246.9	0.03504	16.3	16.46	Energy metabolism and related	Ketone bodies
1,5Anhydrosorbitol							Carbohydrates and related	Polyols
myoInositol	1.069 +/-0.062	0.061	204	0.0012596	24.8	13.6	Carbohydrates and related	Polyols
Erythrol	1.116 +/-0.063	0.101	331.5	1.1036e-08	23.8	22.1	Carbohydrates and related	Polyols
scylloInositol	0.949 +/-0.059	0.042	195.1	0.0019567	19.1	13.0067	Carbohydrates and related	Polyols
Sorbitol (additional: Galactitol, Mannitol)	1.139 +/-0.209	0.622	359.7	1.1014e-08	49.7	23.98	Carbohydrates and related	Polyols
Glucose	0.970 +/-0.019	0.017	7.7	0.047324	15	0.513333	Carbohydrates and related	Monosaccharides
Mannose	0.474 +/-0.083	0.094	59	0.0010746	28.6	3.93333	Carbohydrates and related	Monosaccharides
Glucuronic acid	1.118 +/-0.063	0.068	212.4	2.0713e-06	16.3	14.16	Carbohydrates and related	Sugar acids
Galacturonic acid							Carbohydrates and related	Sugar acids
Glucose1phosphate (additional: Glucose)							Carbohydrates and related	Glycogen metabolism
Mannosamine							Carbohydrates and related	Aminosugars
Glucosamine							Carbohydrates and related	Aminosugars
Sucrose							Carbohydrates and related	Disaccharides
Campesterol							Miscellaneous	Diet related
Pinitol	1.323 +/-0.102	0.336	270.9	8.6597e-14	52.6	18.06	Miscellaneous	Miscellaneous
Glycolate	1.051 +/-0.032	0.073	47	0.0016528	9.8	3.13333	Miscellaneous	Miscellaneous
