# Supplementary material for: The Swine Plasma Metabolome Chronicles "Many Days" Biological Timing and Functions Linked to Growth
Source: PLoS One. 2016 Jan 6;11(1):e0145919. doi: 10.1371/journal.pone.0145919 (PMC4703299; doi:10.1371/journal.pone.0145919)
Supplement: S5 Table — (XLSX) [file pone.0145919.s012.xlsx]

## Sheet: S5_Table
Table S5: Cosinor results are provided for a multidien 5- and 10-day rhythms of serum metabolites from 23:00 serum samples for days 1-14:
Shaded cell denotes the rhythm (or not) for each metabolite
	5 days*	10 days
Number of metaboolites with highest statistical power	N=55	N=11
1,5Anhydrosorbitol
14Methylhexadecanoic acid
1Hydroxy2amino(cis,trans)3,5octadecadiene (from sphingolipids)
2Aminoadipinic acid
2Hydroxybutyrate
3Hydroxybutyrate
3Hydroxyisobutyrate
3Indoxylsulfate
3OMethylsphingosine (d18:1) (additional: Sphingolipids, erythroSphingosine (d18:1), threoSphingosine (d18:1))
4Hydroxyphenylpyruvate
5OMethylsphingosine (d18:1) (additional: Sphingolipids, erythroSphingosine (d18:1), threoSphingosine (d18:1))	1
5Oxoproline (additional: Folic acid, Glutamate, Glutamine)
Alanine
alphaKetoglutarate
alphaTocopherol	2
Arachidonic acid (C20:cis[5,8,11,14]4)
Arginine
Ascorbic acid (additional: Glucose)
Asparagine
Behenic acid (C22:0)
Campesterol
Ceramide (d18:1,C24:0)
Cerotic acid (C26:0)
Cholesterol, free	2
Cholesterol, total
Cholesterylester C16:0
Cholesterylester C16:1
Cholesterylester C18:1
Cholesterylester C18:2
Cholesterylester C20:4
Choline plasmalogen (C18,C20:4)
Citrate
Citrulline
Coenzyme Q10
Cortisol
Creatine
Creatinine
Cresol sulfate
Cysteine (additional: Cystine)
Cystine
DAG (C18:1,C18:2)
Docosapentaenoic acid (C22:cis[7,10,13,16,19]5)
Docosatetraenoic acid (C22:cis[7,10,13,16]4)
Eicosanoic acid (C20:0)
Elaidic acid (C18:trans[9]1)
erythroDihydrosphingosine (d18:0)	1
Erythrol
erythroSphingosine (d16:0)
erythroSphingosine (d18:1) (additional: Sphingolipids)
Fumarate
Galactose, lipid fraction
Galacturonic acid
gammaAminobutyrate (GABA)
gammaLinolenic acid (C18:cis[6,9,12]3)
gammaTocopherol (additional: 2,3Dimethyl5phytylquinol, betaTocopherol)
Glucosamine
Glucose
Glucose1phosphate (additional: Glucose)
Glucuronic acid	2
Glutamate
Glutamine
Glycerol phosphate, lipid fraction
Glycerol, lipid fraction	2
Glycerol3phosphate, polar fraction
Glycine
Glycochenodeoxycholic acid (additional: Glycodeoxycholic acid)
Glycolate
Hentriacontane
Heptadecanoic acid (C17:0)
Hippuric acid
Histidine
Hypoxanthine (additional: Inosine)
Indole3lactic acid
Isocitrate
Isoleucine
Ketoleucine
Lactaldehyde
Lactate
Leucine
Lignoceric acid (C24:0)
Linoleic acid (C18:cis[9,12]2)
Lysine
Lysophosphatidylcholine (C16:0)
Lysophosphatidylcholine (C17:0)
Lysophosphatidylcholine (C18:0)
Lysophosphatidylcholine (C18:1)
Lysophosphatidylcholine (C18:2)	1
Lysophosphatidylcholine (C20:4)
Mannosamine
Mannose
Methionine
myoInositol
myoInositol, lipid fraction
myoInositol2phosphate, lipid fraction (myoInositolphospholipids)
Myristic acid (C14:0)	2
N,NDimethylarginine (ADMA)
Nervonic acid (C24:cis[15]1)
Nicotinamide
Octadecanol
Oleic acid (C18:cis[9]1)
OPhosphoethanolamine
Ornithine (additional: Arginine, Citrulline)
Palmitic acid (C16:0)
Palmitoleic acid (C16:cis[9]1)
Pantothenic acid	2
Pentadecanol
Phenylalanine
Phosphate, lipid fraction
Phosphatidylcholine (C16:0,C16:0)	2
Phosphatidylcholine (C16:0,C18:2)	2
Phosphatidylcholine (C16:0,C20:4) (additional: Phosphatidylcholine (C18:2,C18:2))
Phosphatidylcholine (C16:0,C20:5)	2
Phosphatidylcholine (C16:0,C22:6) (additional: Phosphatidylcholine (C18:2,C20:4))
Phosphatidylcholine (C16:1,C18:2)
Phosphatidylcholine (C18:0,C18:1)
Phosphatidylcholine (C18:0,C18:2)
Phosphatidylcholine (C18:0,C20:3) (additional: Phosphatidylcholine (C20:1,C18:2), Phosphatidylcholine (C20:2,C18:1))
Phosphatidylcholine (C18:0,C20:4)	2
Phosphatidylcholine (C18:0,C22:6)	2
Phosphatidylcholine (C18:1,C18:2) (additional: Phosphatidylcholine (C16:0,C20:3))
Phosphatidylcholine No 02
Phytosphingosine (t18:0), total
Pinitol
Proline
Pseudouridine
Pyruvate (additional: Phosphoenolpyruvate (PEP))	2
Sarcosine
scylloInositol
Serine
Serine, lipid fraction
Sorbitol (additional: Galactitol, Mannitol)
Sphingomyelin (d18:1,C16:0)
Sphingomyelin (d18:1,C24:0)
Sphingomyelin (d18:2,C16:0)
Sphingomyelin (d18:2,C18:0)
Stearic acid (C18:0)
Succinate
Sucrose	2
TAG (C16:0,C16:1)
TAG (C16:0,C18:1,C18:3) (additional: TAG (C16:0,C18:2,C18:2), TAG (C16:1,C18:1,C18:2))
TAG (C16:0,C18:2)	2
TAG (C18:1,C18:2)	2
TAG (C18:2,C18:2)	2
TAG (C18:2,C18:3)
TAG (C16:0,C18:1,C18:2)
Taurine
Taurochenodeoxycholic acid (additional: Taurodeoxycholic acid)
Tetradecanol
Threonic acid
Threonine
threoSphingosine (d18:1) (additional: Sphingolipids)
trans4Hydroxyproline
Tricosanoic acid (C23:0)
Tryptophan
Tyrosine
Urea
Uric acid
Uridine
Valine
*When assessed seperately by trial, significance is achieved only for the trial number appearing in this column (see Supplementary Table 5 for trial details)
