# Supplementary material for: The Swine Plasma Metabolome Chronicles "Many Days" Biological Timing and Functions Linked to Growth
Source: PLoS One. 2016 Jan 6;11(1):e0145919. doi: 10.1371/journal.pone.0145919 (PMC4703299; doi:10.1371/journal.pone.0145919)
Supplement: S6 Table — (XLSX) [file pone.0145919.s013.xlsx]

## Sheet: S6_Table
Table S6: Cosinor results are provided for a multidien 5-day rhythm of serum metabolites from 23:00 serum samples for days 1-14
CAS or HMDB identifier	Metabolite	Outlier pigs removed	Mesor (+/- SD)	Amplitude	Acrophase	pvalue	pr%
*Not mapped by IPA
	Day 2 acrophase group
HMDB31067*	14Methylhexadecanoic acid		0.935 +/-0.129	0.105	102.2	1.4227e-07	17.4
56417	Alanine		0.857 +/-0.069	0.069	120.1	7.0689e-05	21
59029	alphaTocopherol	16	0.861 +/-0.049	0.038	103.5	0.0030197	17.2
506321	Arachidonic acid (C20:cis[5,8,11,14]4)		0.778 +/-0.056	0.078	76.5	6.6784e-08	23.2
74793	Arginine		0.958 +/-0.076	0.078	123.3	7.7759e-05	18.9
70473	Asparagine		0.777 +/-0.069	0.102	116.5	3.0373e-06	19.4
57885	Cholesterol, free	23	0.954 +/-0.026	0.03	28.4	0.011188	22
57885	Cholesterol, total		0.841 +/-0.049	0.04	81.7	0.00032469	20.1
77929	Citrate		0.779 +/-0.092	0.109	108.9	4.7652e-07	20.1
372758	Citrulline		0.956 +/-0.088	0.089	122	3.8108e-06	21.3
HMDB30092	Docosapentaenoic acid (C22:cis[7,10,13,16,19]5)		0.808 +/-0.081	0.076	71.1	7.6933e-06	17.5
149326	Erythrol		0.887 +/-0.063	0.098	122.8	6.0759e-06	18
HMDB00143	Galactose, lipid fraction		0.860 +/-0.052	0.052	99.7	1.4518e-05	16.6
HMDB00127	Glucuronic acid		0.895 +/-0.062	0.052	97.4	0.00039727	16.1
57034	Glycerol phosphate, lipid fraction		0.739 +/-0.097	0.118	100.5	1.2485e-05	16
56815	Glycerol, lipid fraction		0.865 +/-0.094	0.091	88.9	0.0011671	21.2
56406	Glycine		0.848 +/-0.059	0.06	109	2.3822e-05	16.4
HMDB30092	Hentriacontane		0.848 +/-0.050	0.046	85.1	8.4682e-05	23.3
506127	Heptadecanoic acid (C17:0)		0.921 +/-0.135	0.098	103.6	1.2188e-06	16.1
1821529	Indole3lactic acid	16	0.886 +/-0.036	0.041	51.9	0.0054669	18.2
60333	Linoleic acid (C18:cis[9,12]2)		0.832 +/-0.090	0.077	92.7	6.8269e-06	17.8
22252079 *	Lysophosphatidylcholine (C18:2)	22,33	0.898 +/-0.091	0.064	93.8	0.0019864	17.8
87898	myoInositol, lipid fraction		0.806 +/-0.088	0.097	96	2.3959e-06	19
544638	Myristic acid (C14:0)		0.815 +/-0.100	0.083	80.3	4.4488e-05	20.4
30315936	N,NDimethylarginine (ADMA)		1.026 +/-0.058	0.066	95.7	0.001328	17.6
112801	Oleic acid (C18:cis[9]1)		0.790 +/-0.090	0.058	77.4	4.9883e-06	21.4
70268	Ornithine (additional: Arginine, Citrulline)		0.934 +/-0.087	0.075	117.7	6.9814e-06	19
57103	Palmitic acid (C16:0)		0.813 +/-0.067	0.076	87.5	7.5939e-08	19.5
373499	Palmitoleic acid (C16:cis[9]1)		0.796 +/-0.054	0.066	80.1	0.00018277	22.3
79834	Pantothenic acid		0.920 +/-0.087	0.047	118.6	0.00066983	16.2
HMDB01429	Phosphate, lipid fraction	34	0.835 +/-0.054	0.062	90.6	1.2721e-06	17.7
HMDB01429	Phosphatidylcholine (C16:0,C16:0)	4,6,7,11,22,30	1.056 +/-0.049	0.027	87.9	0.032196	19
HMDB07984	Phosphatidylcholine (C16:0,C20:5)	16	0.838 +/-0.044	0.058	97.1	0.00098624	21.5
HMDB08057	Phosphatidylcholine (C18:0,C22:6)		0.951 +/-0.086	0.041	52.1	0.011198	15.8
10284636	Pinitol		0.966 +/-0.112	0.148	118.3	9.0538e-06	18.5
147853	Proline		0.845 +/-0.085	0.085	110.8	4.0451e-06	19.7
127173	Pyruvate	16	0.889 +/-0.047	0.051	136.5	0.0084206	18.5
57114	Stearic acid (C18:0)		0.796 +/-0.062	0.075	89.6	8.1348e-09	21
HMDB44255*	TAG (C16:0,C18:2)	32	0.883 +/-0.061	0.07	93	0.0048254	19.3
HMDB50001*	TAG (C18:1,C18:2)	32	0.872 +/-0.066	0.061	100.7	0.03996	18.4
8001227*	TAG (C18:2,C18:2)		0.899 +/-0.085	0.096	80.2	0.0065951	19.6
72195	Threonine		0.864 +/-0.035	0.043	109.2	0.00013358	17.5
51354	trans4Hydroxyproline		0.874 +/-0.087	0.066	115.4	2.1392e-06	13.3
HMDB30396*	Tryptophan		0.853 +/-0.034	0.028	41.7	0.012572	16.5
60184	Tyrosine		0.931 +/-0.077	0.076	117.4	9.7925e-06	16.2
					95.7826	avgerage	this corresponds to day 2 plus 7hrs 56 minutes
					113.3
	Day 5 acrophase group				290.3
542325	2Aminoadipinic acid		0.800 +/-0.234	0.183	295.7	1.6865e-05	19.6
240491194*	5OMethylsphingosine (d18:1)		0.845 +/-0.069	0.045	355.6	0.022942	18.6
HMDB00885*	Cholesterylester C16:0		1.020 +/-0.091	0.097	302.1	2.0947e-06	15.7
HMDB00918*	Cholesterylester C18:1		1.102 +/-0.113	0.109	301.2	0.00016501	24
3458284	erythroDihydrosphingosine (d18:0)	16	0.859 +/-0.128	0.08	346	0.0058044	17
68940	Hypoxanthine (additional: Inosine)		1.040 +/-0.051	0.099	282.7	1.2884e-07	24.4
3458284	Mannose		1.130 +/-0.242	0.232	273.9	6.2053e-05	21.3
HMDB07973	Phosphatidylcholine (C16:0,C18:2)		1.060 +/-0.026	0.024	258.2	0.0021387	15.4
HMDB08049	Phosphatidylcholine (C18:0,C20:4)	2,4,6	1.008 +/-0.010	0.015	266.3	0.013293	18.4
57501	Sucrose	18	1.476 +/-0.244	0.351	256.7	0.027804	15.9
					293.84	avgerage	this corresponds to day 5 plus 1hr 57 minutes
