# Supplementary material for: The Swine Plasma Metabolome Chronicles "Many Days" Biological Timing and Functions Linked to Growth
Source: PLoS One. 2016 Jan 6;11(1):e0145919. doi: 10.1371/journal.pone.0145919 (PMC4703299; doi:10.1371/journal.pone.0145919)
Supplement: S7 Table — (XLSX) [file pone.0145919.s014.xlsx]

## Sheet: S7_Table
Table S7: Biological functions of the day 2 acrophase group with a 5-day multidien oscillation of
serum metabolites identified from a direct IPA analysis
			ExT circadian time acrophase in decimal hundred hours of peak concentration	Polar Acrophase of 5day multidien rhythm in degrees	Polar acrophase in decimal days of peak concentration
Metabolites relating to proliferation of cells
CAS or HMDB identifier	Genes in dataset	# of Findings
59029	alphatocopherol	1		103.5	1.4375
506321	arachidonic acid	10	4.99333	76.5	1.0625
57885	cholesterol	8	5.06	81.7	1.13472
77929	citric acid	1	11.9533	108.9	1.5125
372758	citrulline	1	18.5933	122	1.69444
79834	Dpantothenic acid	1	10.6067	118.6	1.64722
149326	erythritol	1	22.1	122.8	1.70556
56815	glycerol	3	18.4667	88.9	1.23472
56406	glycine	2	3.32667	109	1.51389
74793	Larginine	4	17.6467	123.3	1.7125
70473	Lasparagine	3	15.7733	116.5	1.61806
60333	linoleic acid	12	18.2933	92.7	1.2875
147853	Lproline	1	17.4733	110.8	1.53889
72195	Lthreonine	6	18.14	109.2	1.51667
30315936	N,Ndimethylarginine	2	23.5	95.7	1.32917
112801	oleic acid	13	19.5067	77.4	1.075
57103	palmitic acid	16	19.6067	80.1	1.1125
HMDB01429	phosphate	4	23.68	90.6	1.25833
127173	pyruvic acid	2
57114	stearic acid	2		89.6	1.24444
			15:49:00		09:36:00
Metabolites relating to apoptosis
57114	stearic acid	14		89.6	1.24444
127173	pyruvic acid	2
HMDB01429	phosphate	9	23.68	90.6	1.25833
57103	palmitic acid	64	19.6067	80.1	1.1125
112801	oleic acid	7	19.5067	77.4	1.075
30315936	N,Ndimethylarginine	1	23.5	95.7	1.32917
60333	linoleic acid	3	18.2933	92.7	1.2875
74793	Larginine	2	17.6467	123.3	1.7125
56406	glycine	2	3.32667	109	1.51389
56815	glycerol	1	18.4667	88.9	1.23472
77929	citric acid	1	11.9533	108.9	1.5125
57885	cholesterol	22	5.06	81.7	1.13472
506321	arachidonic acid	10	4.99333	76.5	1.0625
59029	alphatocopherol	6		103.5	1.4375
			15:05:00		07:12:00
Metabolites relating to quantity of Ca2+
24880453	(all Z)7,10,13,16,19docosapentaenoic acid	1	3.83333	71.1	0.9875
373499	9Zhexadecenoic acid	1	20.2267	80.1	1.1125
506321	arachidonic acid	2	4.99333	76.5	1.0625
57885	cholesterol	4	5.06	81.7	1.13472
77929	citric acid	1	11.9533	108.9	1.5125
56406	glycine	3	3.32667	109	1.51389
506127	heptadecanoic acid	1	20.08	103.6	1.43889
60333	linoleic acid	3	18.2933	92.7	1.2875
544638	myristic acid	1	18.3133	80.3	1.11528
112801	oleic acid	2	19.5067	77.4	1.075
57103	palmitic acid	4	19.6067	80.1	1.1125
HMDB01429	phosphate	1	23.68	90.6	1.25833
127173	pyruvic acid	1
57114	stearic acid	1		89.6	1.24444
			14:04:00		03:36:00
Gene hubs identified from a direct and indirect IPA analysis having more than 25 in and out links (25 links is an arbitrary cut off)*
	gene	No. of links
	TNF	60
	Ca2+	53
	APP	48
	Akt	45
	ERK	38
	ERK1/2	38
	Insulin	37
	JNK	37
	P38 MAPK	37
	cholesterol	36
	P13K (complex)	36
	arachidonic acid	35
	NFkB (complex)	34
	CDKN1A	32
	Pkc(s)	32
	LDL	30
	Mapk	28
	EGF	26
	Il1	26
	Vegf	26
