# Supplementary material for: The Swine Plasma Metabolome Chronicles "Many Days" Biological Timing and Functions Linked to Growth
Source: PLoS One. 2016 Jan 6;11(1):e0145919. doi: 10.1371/journal.pone.0145919 (PMC4703299; doi:10.1371/journal.pone.0145919)
Supplement: S8 Table — (XLSX) [file pone.0145919.s015.xlsx]

## Sheet: S8_Table
Table S8: Cosinor results are provided for a multidien 10-day rhythm of serum metabolites from 23:00 serum samples for days 1-14
CAS or HMDB identifier	Metabolite	Outlier pigs removed	Mesor (+/- SD)	Amplitude	Acrophase	pvalue	pr%
*Not mapped by IPA
	Day 4 acrophase group
56893	Cystine		0.962 +/-0.046	0.036	134.2	0.02484	20.4
61905	Leucine		0.906 +/-0.030	0.056	62.8	0.00055974	24
57136	Urea		0.865 +/-0.063	0.096	93.8	0.00010219	30.6
69932	Uric acid	28	1.001 +/-0.052	0.11	111.5	0.00092884	27
58968	Uridine		0.946 +/-0.046	0.086	149	0.00080323	24.6
					110.26	avgerage	this corresponds to day 4 plus 1hr 32 minutes
	Day 7 acrophase group
557595	Lignoceric acid (C24:0)		0.974 +/-0.050	0.082	200	1.8276e-07	29.1
HMDB10396	Lysophosphatidylcholine (C20:4)		0.919 +/-0.050	0.47	188.4	0.035773	19.1
98920	Nicotinamide		1.086 +/-0.087	0.127	255.7	3.8696e-05	29.7
1071234	OPhosphoethanolamine		1.188 +/-0.062	0.17	254.6	1.4263e-05	29
488595	scylloInositol		0.925 +/-0.052	0.083	317	0.0003325	29.9
HMDB01160*	Tricosanoic acid (C23:0)		0.925 +/-0.046	0.073	192.4	0.00032053	23
					234.683	avgerage	this corresponds to day 7 plus 12hrs 28 minutes
