# Supplementary material for: The Swine Plasma Metabolome Chronicles "Many Days" Biological Timing and Functions Linked to Growth
Source: PLoS One. 2016 Jan 6;11(1):e0145919. doi: 10.1371/journal.pone.0145919 (PMC4703299; doi:10.1371/journal.pone.0145919)
Supplement: S9 Table — (XLSX) [file pone.0145919.s016.xlsx]

## Sheet: S9_Table
Table S9: Cosinor results are provided for the day 2 acrophase group with a a multidien 5-day rhythm of serum sncRNA from 23:00 serum samples for days 1-14
sncRNA sequence (IPA mapped in bold)	Mesor (+/- SD)	Amplitude	Acrophase	p-value	pr%		Omiras Annotation; Pig	Alias	Annotation to pig-sncRNAs	Alias	Annotation to all sncRNAs	IPA mapped Synonym
TGGACGTTGGCTCTGGTGGTGA	26.701 +/- 2.515	9.72926	-63.2928	0.0318094	46.5759		ssc-miR-136-3p		ssc-mir-1306	MI0013148	hsa-mir-1306	miR-1306-3p (sncRNAs w/seed CGUUGGC)
TCACCGGGTGTAATCAGCTG	24.405 +/-1.608	6.6729	-63.471	0.0219	50.08
CACGCTCATGCACACACCCACA	21.777 +/- 1.694	7.13935	-64.9811	0.0199223	50.9331		ssc-miR-574	MI0013161	ssc-mir-574	MI0013161	ggo-mir-574
TCAGGCTCAGTCCCCTCCCGATT	264.293 +/- 20.353	76.7251	-71.8921	0.0350332	45.6299				ssc-mir-484	MI0015929	bta-mir-484	miR-344a-5p (and other sncRNAs w/seed CAGGCUC)
TCTAGCATCGAGCACCCGCCT	408.432 +/- 35.204	126.578	-73.4535	0.0439503	43.3414		ssc-miR-9841-3p	MIMAT0037059
AACGAAAGTTAGGGGATCGAAGACG	32.549 +/- 1.882	11.2444	-80.9326	0.0018952	68.009
GCTCAAATTTGAAATCTG	57.330 +/- 4.265	16.2803	-81.9933	0.0321565	46.4703
AATACAAACCATGAAAGTGTGGCCTATCGATCCTTTAG	18.271 +/- 1.489	9.6963	-82.2997	0.000976734	71.6413
ACAAGTCAGGCTCTTGGGACCTTT	68.091 +/- 4.525	18.4638	-84.266	0.0225403	49.8191
CAGTAATGCATTAAGCTAACCAGTACTAATTGCCCGTACGGCT	20.207 +/- 3.667	14.7075	-84.6861	0.0247574	48.9558
TTCAGTGCACTACAGAACTTTGT	54.530 +/- 4.631	17.043	-86.2415	0.0385415	44.6782				ssc-mir-148a	MI0002418	ptr-mir-148a
AAATCTCCAGTAGAACAAAAGGG	104.747 +/- 5.357	31.8117	-87.9832	0.00197371	67.772
TCACAGTGAACCGGTCTCTTT	316.901 +/- 21.852	86.9122	-88.573	0.0258838	48.5412		ssc-miR-128		ssc-mir-128-2	MI0013094	ppy-mir-128-2
CACCGGGTGTAAAATCAGCTTG	21.710 +/- 1.290	6.72286	-89.2537	0.00500984	61.8244
TCCCTGTCCTCCAGGAGCTC	139.678 +/- 12.228	43.1185	-94.2088	0.0475585	42.5227		ssc-miR-4334-3p	MIMAT0020366	ssc-mir-339-1		ssc-mir-339-1	miR-339-5p (and other sncRNAs w/seed CCCUGUC)
AGCTCTTTCTTGATTTTGTG	19.859 +/- 1.754	8.28402	-97.2855	0.00967946	56.968
TCACAGTGAACCGGTCTCTTTA	19.541 +/- 2.104	11.3909	-97.7487	0.00392334	63.484				ssc-mir-128-2	MI0013094	ccr-mir-128
CAAAGAATTCTCCTTTTGGG	433.796 +/- 35.463	144.4	-98.9316	0.0231776	49.5641				ssc-mir-186	MI0002456	cfa-mir-186	miR-186-5p (sncRNAs w/seed AAAGAAU)
CTAGACTGAAGCTCCTTGAGGAA	191.088 +/- 20.358	80.2925	-99.1304	0.0275133	47.9668				ssc-mir-151	MI0013100	ptr-mir-151
CTCTAGATAGTCAAGTTCTGATCCAG	41.258 +/- 6.535	23.8026	-99.8196	0.0412387	43.9937						mmu-mir-3535	miR-3201 (and other sncRNAs w/seed GGAUAUG)
TGTCAGTTTGTCAAATACCCC	58.017 +/- 3.085	10.8204	-103.443	0.0498056	42.0383						sla-mir-223	miR-223-3p (sncRNAs w/seed GUCAGUU)
ATCACATTGCCAGGGATT	57.145 +/- 4.557	17.9995	-107.071	0.0280806	47.7734				ssc-mir-23b	MI0013112	ssc-mir-23a	miR-23a-3p (and other sncRNAs w/seed UCACAUU)
AACCTTCCTTGGATGTCTGAGTGA	12.426 +/- 1.847	6.64494	-108.546	0.0450505	43.0861
GTCTCCAAGGTGAACAGCCTCTG	39.661 +/- 3.495	12.4383	-110.423	0.0477957	42.4707
TGAGGTAGTAGGTTGTGT	31.841 +/- 3.512	14.885	-113	0.0197156	51.026				ssc-let-7a-2	MI0017984	ola-let-7b-1	let-7a-5p (and other sncRNAs w/seed GAGGUAG)
CGAAACGGTCCTGTAAG	22.851 +/- 1.913	7.49219	-114.674	0.030487	46.9867
CGAAACGGTCCTGTAAGCAGTAGAG	30.754 +/- 2.275	11.4922	-115.843	0.00690636	59.5297
ATGAACCGAACGCGAGG	21.592 +/- 1.212	7.61965	-116.097	0.00145775	69.4996
GTGGCTGTGGCATAGACCTCAG	23.132 +/- 2.709	9.88292	-116.428	0.0437741	43.3828
AATGGCGCCACTAGGGTTGT	34.159 +/- 3.494	12.7024	-118.15	0.0448907	43.1229				ssc-mir-652	MI0015919	mml-mir-652	miR-652-3p (sncRNAs w/seed AUGGCGC)
TTGTGCTACGATCTGCTGAGGTTCAGCCTTTGTTCTCGGATTT	29.550 +/- 3.696	14.0254	-118.851	0.0365869	45.1992
CATGGAATAATAGAATAGGACGTGTGG	67.567 +/- 4.286	18.318	-121.089	0.019801	50.9875
AATTCCGTGAATCATCGAATCTTTG	28.473 +/- 3.208	11.9098	-121.112	0.0412725	43.9853
TCCCTGGTGGTCTAGTGGTTAGGATTCGGCGCTC	21.118 +/- 2.759	10.0161	-121.327	0.0460465	42.8594
ATCTCCAGTAGAACAAAAGGG	35.241 +/- 3.491	12.6842	-123.406	0.0463696	42.7867
CAAAGAATTCTCCTTTTGGGC	117.171 +/- 11.052	41.5838	-123.964	0.039369	44.4641				ssc-mir-186	MI0002456	cfa-mir-186
CAGTGGTTTTACCCTATGGTAA	59.439 +/- 6.742	27.0065	-125.088	0.0288921	47.5021				ssc-mir-140	MI0002437	mml-mir-140
GATCTCTTGGTTCTGG	20.863 +/- 2.353	13.784	-125.731	0.00269533	65.8934
CATTGCACTTGTCTCGGTCT	22.702 +/- 2.004	8.76018	-127.333	0.0182309	51.7182						mne-mir-25
ACTTAGCTGTGCGAAACGGTCCTGTAAGCAG	13.330 +/- 1.772	7.0905	-128.286	0.0296649	47.2496
AACGTGGGCATTCGAATGTATCAACACTAGTGG	20.574 +/- 2.474	10.6907	-131.997	0.0201225	50.8438
CAGATCTTGGTGGTAG	31.627 +/- 2.404	9.01622	-134.258	0.042688	43.6408						sha-mir-716a
CAGTAATGCGTTAAGCTAACTGATACTAATTGCTCGTGCGGCT	53.829 +/- 7.048	31.0974	-137.49	0.0186681	51.5097
TCAGGCTCAGTCCCCTCCCGAT	22.810 +/- 1.608	10.9585	-141.826	0.00101045	71.4658				ssc-mir-484	MI0015929	ptr-mir-484
TAGGGGATCGAAGACG	23.126 +/- 2.020	9.39169	-147.026	0.0148045	53.5116
AAACTTTCAACAACGGATCTCTTGGTTCTGGCATCGATG	26.472 +/- 3.075	14.2642	-149.79	0.0153077	53.2282
ATTCAAGTAATCCAGGATAGGCT	39.409 +/- 4.433	17.3048	-151.116	0.0390091	44.5568				ssc-mir-26a	MI0002429	cgr-mir-26a
ATAGACGGACAAGAATAG	25.388+/- 2.299	9.38415	-151.408	0.0311916	46.7661
TTCACCGTGGCTAAGTTCCG	8.388 +/- 1.581	6.31047	-157.968	0.0361335	45.3233				ssc-mir-27a	MI0002442	hsa-mir-27a	miR-27a-3p (and other sncRNAs w/seed UCACAGU)
CTGACCTATGAATTGACAGACA	4.852 +/- 0.763	4.35604	-160.588	0.004376	62.7518				ssc-mir-215	MI0010687	ssc-mir-215
TGTGCTACGATCTGCTGAGGTTCAGCCCGTGTTTCAAGATTTG	19.533 +/- 3.212	16.8643	-161.33	0.00763024	58.7896
GGCTGGGCCGATGGTAGTGGGGCATCAGAACA	6.477 +/-0.890	4.07836	-167.61	0.0178639	51.8964
			-112.36	avgerage	this corresponds to day 2 plus 13hrs 27 minutes
GAGAAAGACATAGTGG	109.131 +/- 9.330	37.449	-219.59	0.0304795	46.9891		ssc-tRNA-tRNA-Pseudo-TGA
AGGATCCAGCATTGCC	50.700 +/- 5.674	20.4607	-248.779	0.043983	43.3338
CCCACTGAGCGAGGCCAGG	35.194 +/- 3.170	13.1193	-267.95	0.0208328	50.5327
GCGCGCGTGCGCGTCGGGT	13.334+/- 1.634	8.03952	-289.511	0.00786697	58.56		pig-specific (Li et al. 2010; main text))
CGGCGACTCTGGACGCG	39.828 +/- 3.824	16.8235	-294.195	0.0160433	52.8274
CCCCCCCCAACCACGTTTGACTGACTG	26.280+/- 3.108	11.0728	-298.137	0.0493631	42.1322
GTTATATGGTCAAGCGAAT	583.822 +/- 126.957	518.699	-300.994	0.0253253	48.7449
GTCCGCGCCCCCTCGCC	24.116 +/- 4.104	15.8197	-304.021	0.0349371	45.6571
TCTCCCGCCCGTCGCCCGCGCG	19.349 +/- 1.804	6.53271	-307.965	0.0484107	42.3368
GGGTCGGGGCGGGGCGGACTG	36.541 +/- 2.646	10.1834	-310.236	0.036696	45.1696
AAGGACGTGGCAGCCTGCGAAAAGT	108.114+/- 25.831	99.6922	-319.312	0.0383979	44.7158
AGGATCTGGCGTTGCCG	32.605 +/- 2.385	13.2575	-320.591	0.00448969	62.5777
AGGGGCGGCGCGGGGCGGG	65.190 +/- 5.124	23.5985	-327.137	0.0156726	53.0275
GGTCGCCCGGGGACGCCGGG	63.928 +/- 4.653	21.3566	-331.632	0.0164751	52.5991
TGCGGCGTGTCCCGTC	123.733 +/- 13.365	62.2017	-331.985	0.0152195	53.2774
GGGCTGGGTCGGTCGGGCTGGGGCG	47.846 +/- 3.231	13.8438	-333.978	0.0245403	49.0375
CCGGTGAGCTCTCGCTGGCC	32.087 +/- 3.952	16.1208	-341.203	0.0328148	46.2728						hsa-mir-4792	miR-4792 (sncRNAs w/seed GGUGAGC)
CCCGCCCGTCGCCCGCGCG	48.429 +/- 3.409	14.2506	-344.304	0.0292442	47.3864
GGCTGGGCCGATGGTAGTGGGGCATCAAAACT	3.894 +/-0.765	2.84312	-25.0218	0.0487519	42.2632
			-290.344	avgerage	this corresponds to day 5 plus 46 minutes
