# Supplementary material for: The Swine Plasma Metabolome Chronicles "Many Days" Biological Timing and Functions Linked to Growth
Source: PLoS One. 2016 Jan 6;11(1):e0145919. doi: 10.1371/journal.pone.0145919 (PMC4703299; doi:10.1371/journal.pone.0145919)
Supplement: S10 Table — (XLSX) [file pone.0145919.s017.xlsx]

## Sheet: S10_Table
Table S10: Serum 5-day rhythm sncRNA sequences (check marks) together with families of related sequences identified in this study
5-day sequence								IPA mapped
a	TCTAGCATCGAGCACCCGCCT
	TCTAGCATCGAGCACCCGCCTT
	TCTAGCATCGAGCACCCGCCTTT
	TCTAGCATCGAGCACCCGCCTA
	TCTAGCATCGAGCACCCGCCTTA
	TCTAGCATCGAGCACCCGCCTC
	TCTAGCATCGAGCACCCGCCTAA
	TCTAGCATCGAGCACCCGCCTAT
	TCTAGCATCGAGCACCCGCCTAG
a	GTTATATGGTCAAGCGAAT
	GTTATATGGTCAAGCGAATAGATCGGAAACACACGTCTGAACT
a	TCACAGTGAACCGGTCTCTTT
	TCACAGTGAACCGGTCTCTTTT
	TCACAGTGAACCGGTCTCTTTA
	TCACAGTGAACCGGTCTCTTTAA
	TCACAGTGAACCGGTCTCTTTAT
	TCACAGTGAACCGGTCTCTTTTT
	TCACAGTGAACCGGTCTCTTTAG
	TCACAGTGAACCGGTCTCTTTTA
	TCACAGTGAACCGGTCTCTTTC
	TCACAGTGAACCGGTCTCTTTGA
	TCACAGTGAACCGGTCTCTTTGT
	TCACAGTGAACCGGTCTCTTTG
	TCACAGTGAACCGGTCTCTTTTG
a	CAAAGAATTCTCCTTTTGGG							IPA ID
	CAAAGAATTCTCCTTTTGGGCT
	CAAAGAATTCTCCTTTTGGGCTT
	CAAAGAATTCTCCTTTTGGGA
	CAAAGAATTCTCCTTTTGGGC
	CAAAGAATTCTCCTTTTGGGCTTT
	CAAAGAATTCTCCTTTTGGGCA
	CAAAGAATTCTCCTTTTGGGCTAT
	CAAAGAATTCTCCTTTTGGGCTTA
	CAAAGAATTCTCCTTTTGGGCTTTT
	CAAAGAATTCTCCTTTTGGGCTA
	CAAAGAATTCTCCTTTTGGGCGT
	CAAAGAATTCTCCTTTTGGGCG
	CAAAGAATTCTCCTTTTGGGCTG
	CAAAGAATTCTCCTTTTGGGAT
	CAAAGAATTCTCCTTTTGGGAG
	CAAAGAATTCTCCTTTTGGGG
	CAAAGAATTCTCCTTTTGGGCTTAG
	CAAAGAATTCTCCTTTTGGGCTAA
	CAAAGAATTCTCCTTTTGGGCTTTA
	CAAAGAATTCTCCTTTTGGGCTGT
	CAAAGAATTCTCCTTTTGGGCAA
	CAAAGAATTCTCCTTTTGGGCTAG
a	TCAGGCTCAGTCCCCTCCCGATT							IPA ID
	TCAGGCTCAGTCCCCTCCCGATTT
	TCAGGCTCAGTCCCCTCCCGATTA
	TCAGGCTCAGTCCCCTCCCGATTAG
a	TCCCTGTCCTCCAGGAGCTC							IPA ID
	TCCCTGTCCTCCAGGAGCTCA
	TCCCTGTCCTCCAGGAGCTCAA
	TCCCTGTCCTCCAGGAGCTCAC
	TCCCTGTCCTCCAGGAGCTCACT
	TCCCTGTCCTCCAGGAGCTCACA
	TCCCTGTCCTCCAGGAGCTCC
	TCCCTGTCCTCCAGGAGCTCT
	TCCCTGTCCTCCAGGAGCTCCA
	TCCCTGTCCTCCAGGAGCTCAT
	TCCCTGTCCTCCAGGAGCTCCC
	TCCCTGTCCTCCAGGAGCTCATT
	TCCCTGTCCTCCAGGAGCTCCCT
	TCCCTGTCCTCCAGGAGCTCAG
	TCCCTGTCCTCCAGGAGCTCTT
	TCCCTGTCCTCCAGGAGCTCATA
	TCCCTGTCCTCCAGGAGCTCAGA
	TCCCTGTCCTCCAGGAGCTCACG
	TCCCTGTCCTCCAGGAGCTCCCA
	TCCCTGTCCTCCAGGAGCTCTA
	TCCCTGTCCTCCAGGAGCTCAAA
	TCCCTGTCCTCCAGGAGCTCACTA
	TCCCTGTCCTCCAGGAGCTCG
	TCCCTGTCCTCCAGGAGCTCAAG
	TCCCTGTCCTCCAGGAGCTCAGT
	TCCCTGTCCTCCAGGAGCTCACC
	TCCCTGTCCTCCAGGAGCTCAAT
	TCCCTGTCCTCCAGGAGCTCACGT
	TCCCTGTCCTCCAGGAGCTCGA
	TCCCTGTCCTCCAGGAGCTCATG
a	CTAGACTGAAGCTCCTTGAGGAA
	CTAGACTGAAGCTCCTTGAGGAAA
	CTAGACTGAAGCTCCTTGAGGAAT
	CTAGACTGAAGCTCCTTGAGGAAG
	CTAGACTGAAGCTCCTTGAGGAAAG
a	TGCGGCGTGTCCCGTC
	TGCGGCGTGTCCCGTCG
a	CAAAGAATTCTCCTTTTGGGC
	CAAAGAATTCTCCTTTTGGGCT
	CAAAGAATTCTCCTTTTGGGCTT
	CAAAGAATTCTCCTTTTGGGCTTT
	CAAAGAATTCTCCTTTTGGGCA
	CAAAGAATTCTCCTTTTGGGCTAT
	CAAAGAATTCTCCTTTTGGGCTTA
	CAAAGAATTCTCCTTTTGGGCTTTT
	CAAAGAATTCTCCTTTTGGGCTA
	CAAAGAATTCTCCTTTTGGGCGT
	CAAAGAATTCTCCTTTTGGGCG
	CAAAGAATTCTCCTTTTGGGCTG
	CAAAGAATTCTCCTTTTGGGCTTAG
	CAAAGAATTCTCCTTTTGGGCTAA
	CAAAGAATTCTCCTTTTGGGCTTTA
	CAAAGAATTCTCCTTTTGGGCTGT
	CAAAGAATTCTCCTTTTGGGCAA
	CAAAGAATTCTCCTTTTGGGCTAG
a	AAATCTCCAGTAGAACAAAAGGG
	AAATCTCCAGTAGAACAAAAGGGTAAAAG
	AAATCTCCAGTAGAACAAAAGGGTAAAAGTCCCCTTGATTTTG
	AAATCTCCAGTAGAACAAAAGGGA
a	AAGGACGTGGCAGCCTGCGAAAAGT
	AAGGACGTGGCAGCCTGCGAAAAGTA
a	CAGTAATGCGTTAAGCTAACTGATACTAATTGCTCGTGCGGCT
a	GGTCGCCCGGGGACGCCGGG
	GGTCGCCCGGGGACGCCGGGG
	GGTCGCCCGGGGACGCCGGGGT
	GAGAAAGACATAGTGGTTATGACGTT
	GAGAAAGACATAGTGGTTATGACGT
	GAGAAAGACATAGTGGTTATGACGTTG
	GAGAAAGACATAGTGGTTATGACG
	GAGAAAGACATAGTGGTTATGACGTTGG
a	GAGAAAGACATAGTGG
	GAGAAAGACATAGTGGTTATGACGTTGGC
	GAGAAAGACATAGTGGTTATGACGTTGGCTTGAAACCAGTGGG
	GAGAAAGACATAGTGGTT
	GAGAAAGACATAGTGGTTATGAC
	GAGAAAGACATAGTGGTTATGACGTTGGCTTGAAACC
	GAGAAAGACATAGTGGTTATGACGTTGGCT
	GAGAAAGACATAGTGGTTATGACGTTGGCTTGAAACCA
	GAGAAAGACATAGTGGTTATGCCGTT
	GAGAAAGACATAGTGGT
	GAGAAAGACATAGTGGTTATGCCGT
	GAGAAAGACATAGTGGGTATGACGTT
	GAGAAAGACATAGTGGTTATGCCGTTG
	GAGAAAGACATAGTGGTTATGACGTA
	GAGAAAGACATAGTGGTTAT
	GAGAAAGACATAGTGGTTATGACGA
a	CATGGAATAATAGAATAGGACGTGTGG
	CATGGAATAATAGAATAGGACGTGTGGTTCT
	CATGGAATAATAGAATAGGACGTGTGGT
	CATGGAATAATAGAATAGGACGTGTGGTTCTA
	CATGGAATAATAGAATAGGACGTGTGGTT
	CATGGAATAATAGAATAGGACGTGTGGTTCTATT
	CATGGAATAATAGAATAGGACGTGTGGTTCTAT
	CATGGAATAATAGAATAGGACGTGTGGTTCTATTTT
	CATGGAATAATAGAATAGGACGTGTGGTTC
	CATGGAATAATAGAATAGGACGTGTGGTTCTATTT
	CATGGAATAATAGAATAGGACGTGTGGTTCTATTTTGTT
a	TGTCAGTTTGTCAAATACCCC
	TGTCAGTTTGTCAAATACCCCAA
	TGTCAGTTTGTCAAATACCCCA
	TGTCAGTTTGTCAAATACCCCATT
	TGTCAGTTTGTCAAATACCCCAT
	TGTCAGTTTGTCAAATACCCCAAT
	TGTCAGTTTGTCAAATACCCCAAA
	TGTCAGTTTGTCAAATACCCCCA
	TGTCAGTTTGTCAAATACCCCATA
	TGTCAGTTTGTCAAATACCCCAAAG
	TGTCAGTTTGTCAAATACCCCT
	TGTCAGTTTGTCAAATACCCCTT
	TGTCAGTTTGTCAAATACCCCATC
	TGTCAGTTTGTCAAATACCCCC
	TGTCAGTTTGTCAAATACCCCTTT
	TGTCAGTTTGTCAAATACCCCAG
	TGTCAGTTTGTCAAATACCCCCTT
	TGTCAGTTTGTCAAATACCCCATG
	TGTCAGTTTGTCAAATACCCCAC
	TGTCAGTTTGTCAAATACCCCAAACACGGACAGGATTGAC
	TGTCAGTTTGTCAAATACCCCAACACGGACAGGATTGACAGAA
	TGTCAGTTTGTCAAATACCCCGA
	TGTCAGTTTGTCAAATACCCCTA
a	GGCTGGGCCGATGGTAGTGGGGCATCAGAACA
	GGCTGGGCCGATGGTAGTGGGGCATCAGAACAG
a	ACAAGTCAGGCTCTTGGGACCTTT
a	AGGGGCGGCGCGGGGCGGG
	AGGGGCGGCGCGGGGCGGGG
	AGGGGCGGCGCGGGGCGGGGG
	AGGGGCGGCGCGGGGCGGGT
a	GTCTCCAAGGTGAACAGCCTCTG
	GTCTCCAAGGTGAACAGCCTCTGGTTGATAGAACAATG
	GTCTCCAAGGTGAACAGCCTCTGGTTGATAGAACAATGT
a	CCCGCCCGTCGCCCGCGCG
a	CCCGCCCGTCGCCCGCGCGC
	CCCGCCCGTCGCCCGCGCGCGCG
	CCCGCCCGTCGCCCGCGCGCGCGCGCGCCCC
	CCCGCCCGTCGCCCGCGCGCG
	CCCGCCCGTCGCCCGCGCGCGCGCGCGCCC
	CCCGCCCGTCGCCCGCGCGCGCGCGCCCC
a	CAGTGGTTTTACCCTATGGTAA
a	CTCTAGATAGTCAAGTTCTGATCCAG							IPA ID
a	GGCTGGGCCGATGGTAGTGGGGCATCAAAACT
a	TCACCGGGTGTAATCAGCTG
	TCACCGGGTGTAATCAGCT
a	CGAAACGGTCCTGTAAGCAGTAGAG
	CGAAACGGTCCTGTAAGCAGTAGAGT
	CGAAACGGTCCTGTAAGCAGTAGAGTAG
	CGAAACGGTCCTGTAAGCAGTAGAGTAGCCTTGTTG
	CGAAACGGTCCTGTAAGCAGTAGAGTAGCCTTG
	CGAAACGGTCCTGTAAGCAGTAGAGTAGCCTTGTTGTTACGAG
	CGAAACGGTCCTGTAAGCAGTAGAGTAGCCTTGTTGTTACGAT
	CGAAACGGTCCTGTAAGCAGTAGAGTAGCCTTGTT
a	GGGCTGGGTCGGTCGGGCTGGGGCG
	GGGCTGGGTCGGTCGGGCTGGGGCGCG
a	CCCACTGAGCGAGGCCAGG
	CCCACTGAGCGAGGCCAGGGATCGAACC
	CCCACTGAGCGAGGCCAGGG
	CCCACTGAGCGAGGCCAGGGATTGAACC
	CCCACTGAGCGAGGCCAGGGATC
	CCCACTGAGCGAGGCCAGGGATCAAACC
	CCCACTGAGCGAGGCCAGGGATCGAACCC
a	ATCACATTGCCAGGGATT
	ATCACATTGCCAGGGATTTCC
	ATCACATTGCCAGGGATTTCCA
	ATCACATTGCCAGGGATTACC
	ATCACATTGCCAGGGATTACCACT
	ATCACATTGCCAGGGATTTC
	ATCACATTGCCAGGGATTT
	ATCACATTGCCAGGGATTTCCAA
	ATCACATTGCCAGGGATTAC
	ATCACATTGCCAGGGATTACCA
	ATCACATTGCCAGGGATTTCCAT
	ATCACATTGCCAGGGATTTCG
	ATCACATTGCCAGGGATTTCA
	ATCACATTGCCAGGGATTTCCT
	ATCACATTGCCAGGGATTTCCATT
	ATCACATTGCCAGGGATTACCAC
	ATCACATTGCCAGGGATTTCCAAT
	ATCACATTGCCAGGGATTTCCC
	ATCACATTGCCAGGGATTTT
	ATCACATTGCCAGGGATTTCCTT
	ATCACATTGCCAGGGATTTCT
	ATCACATTGCCAGGGATTTCCG
	ATCACATTGCCAGGGATTTCCAG
	ATCACATTGCCAGGGATTTCCAAA
	ATCACATTGCCAGGGATTTCAA
	ATCACATTGCCAGGGATTA
	ATCACATTGCCAGGGATTAA
	ATCACATTGCCAGGGATTTAC
	ATCACATTGCCAGGGATTACA
	ATCACATTGCCAGGGATTACG
	ATCACATTGCCAGGGATTACCACA
	ATCACATTGCCAGGGATTTCCAGGCTGGTCCGATGGTAGTGGG
	ATCACATTGCCAGGGATTTCCAGT
a	CAGATCTTGGTGGTAG
	CAGATCTTGGTGGTAGTAGCAAATACTTCAATG
	CAGATCTTGGTGGTAGTAGCA
	CAGATCTTGGTGGTAGTAGCAA
	CAGATCTTGGTGGTAGTAGCAAATACTTCAAT
	CAGATCTTGGTGGTAGTAGCAAATACTTCA
	CAGATCTTGGTGGTAGTAGCAAATA
	CAGATCTTGGTGGTAGTAGCAAATACTCAAATG
	CAGATCTTGGTGGTAGTAGCAAA
	CAGATCTTGGTGGTAGTAGCAAATACTTCAATGAG
	CAGATCTTGGTGGTAGTAGCAAATACTCA
	CAGATCTTGGTGGTAGTAGCAAATACTTCAA
	CAGATCTTGGTGGTAGT
	CAGATCTTGGTGGTAGTAGCAAATATTCA
	CAGATCTTGGTGGTAGTAGCAAATACTT
	CAGATCTTGGTGGTAGTAGCAAATACT
	CAGATCTTGGTGGTAGTAGCAAATACTCAAA
	CAGATCTTGGTGGTAGTAGCAAATACTCAA
	CAGATCTTGGTGGTAGTAGCAAATATTCAAATG
	CAGATCTTGGTGGTAGTAGCAAATACTTCAATGAGAACTTGAA
	CAGATCTTGGTGGTAGTAGC
	CAGATCTTGGTGGTAGTAGCAAAT
	CAGATCTTGGTGGTAGTAGCAAATATTCAAA
	CAGATCTTGGTGGTAGTAGCAAATACTCAAAT
	CAGATCTTGGTGGTAGTAGCAAATACTCAAATGA
	CAGATCTTGGTGGTAGTAGCAAATATTCAA
	CAGATCTTGGTGGTAGTAGCCAATACTTCAATG
	CAGATCTTGGTGGTAGTAGCAAATACTTCAATGA
	CAGATCTTGGTGGTAGTAGCAAATACTCAAATGAG
	CAGATCTTGGTGGTAGTAGCAAATACTC
a	GCTCAAATTTGAAATCTG
	GCTCAAATTTGAAATCTGGC
	GCTCAAATTTGAAATCTGG
a	AATGGCGCCACTAGGGTTGT							IPA ID
	AATGGCGCCACTAGGGTTGTGT
	AATGGCGCCACTAGGGTTGTG
	AATGGCGCCACTAGGGTTGTGC
	AATGGCGCCACTAGGGTTGTGTT
	AATGGCGCCACTAGGGTTGTGTA
	AATGGCGCCACTAGGGTTGTGA
a	TTCACCGTGGCTAAGTTCCG							IPA ID
	TTCACCGTGGCTAAGTTCCGT
	TTCACCGTGGCTAAGTTCCGC
	TTCACCGTGGCTAAGTTCCGA
a	GATCTCTTGGTTCTGG
	GATCTCTTGGTTCTGGCATCGATGAAGAACG
	GATCTCTTGGTTCTGGCATCGATG
	GATCTCTTGGTTCTGGCATCGATGAAG
	GATCTCTTGGTTCTGGCATCGATGAAGAACGCAG
	GATCTCTTGGTTCTGGCATCGATGAAGAACGCAGCG
	GATCTCTTGGTTCTGGCATCG
	GATCTCTTGGTTCTGGCATCGAT
	GATCTCTTGGTTCTGGCATCGATGAAGAACGCAGCGAAATGAG
	GATCTCTTGGTTCTGGCATCGATGAAGAACGCA
	GATCTCTTGGTTCTGGCATCGATGA
	GATCTCTTGGTTCTGGCATCGATGAAGAACGCAGCGAAATGCG
	GATCTCTTGGTTCTGGCATCGATGAAGAACGCAGC
	GATCTCTTGGTTCTGGCATCGATGAAGA
	GATCTCTTGGTTCTGGCATCGATGAAGAACGC
	GATCTCTTGGTTCTGGCATC
	GATCTCTTGGTTCTGGCCTCGATGAAG
	GATCTCTTGGTTCTGGCCTCGATG
	GATCTCTTGGTTCTGGCA
	CGAAACGGTCCTGTAAGCAG
	CGAAACGGTCCTGTAAGCAGTAGAG
	CGAAACGGTCCTGTAAGCAGTAG
a	CGAAACGGTCCTGTAAG
	CGAAACGGTCCTGTAAGCAGT
	CGAAACGGTCCTGTAAGCAGTAGAGT
	CGAAACGGTCCTGTAAGCA
	CGAAACGGTCCTGTAAGCAGTAGAGTAG
	CGAAACGGTCCTGTAAGCAGTAGAGTAGCCTTGTTG
	CGAAACGGTCCTGTAAGCAGTAGAGTAGCCTTG
	CGAAACGGTCCTGTAAGCAGTAGAGTAGCCTTGTTGTTACGAG
	CGAAACGGTCCTGTAAGCAGTA
	CGAAACGGTCCTGTAAGCAGTAGAGTAGCCTTGTTGTTACGAT
	CGAAACGGTCCTGTAAGC
	CGAAACGGTCCTGTAAGCAGTAGAGTAGCCTTGTT
a	CCGGTGAGCTCTCGCTGGCC							IPA ID
	CCGGTGAGCTCTCGCTGGCCC
a	TTCAGTGCACTACAGAACTTTGT
	AATTCCGTGAATCATCGAATCTTTGAACG
a	AATTCCGTGAATCATCGAATCTTTG
	AATTCCGTGAATCATCGAATCTTTGAACGCACATTG
	AATTCCGTGAATCATCGAATCTTTGAA
	AATTCCGTGAATCATCGAATCTTTGA
	AATTCCGTGAATCATCGAATCTTTGAACGCACA
	AATTCCGTGAATCATCGAATCTTTGAACGCA
	AATTCCGTGAATCATCGAATCTTTGAACGCACATTGCGCCCGC
	AATTCCGTGAATCATCGAATCTTTGAACGCACATT
a	CACCGGGTGTAAAATCAGCTTG
a	AGGATCCAGCATTGCC
	AGGATCCAGCATTGCCGTGAGC
	AGGATCCAGCATTGCCATGAGC
	AGGATCCAGCATTGCCATGAGCTGTGGTG
	AGGATCCAGCATTGCCATGAGCT
	AGGATCCAGCATTGCCGTG
	AGGATCCAGCATTGCCATGAGCTGTGGTGTAGG
	AGGATCCAGCATTGCCATGAGCTG
	AGGATCCAGCATTGCCGTGAGCTGTGGTGTAGG
	AGGATCCAGCATTGCCGTGAGCTG
	CGGCGACTCTGGACGCGAGCC
	CGGCGACTCTGGACGCGAGC
	CGGCGACTCTGGACGCGAGCCGGGCCCTTCCCGTGGATCGCCC
a	CGGCGACTCTGGACGCG
	CGGCGACTCTGGACGCGAG
	CGGCGACTCTGGACGCGCGCC
	CGGCGACTCTGGACGCGCGC
	CGGCGACTCTGGACGCGAGCCGGG
	CGGCGACTCTGGACGCGAGCCGGGC
	CGGCGACTCTGGACGCGAGCCG
	CGGCGACTCTGGACGCGAGCCGGGCCC
	CGGCGACTCTGGACGCGAGCCGT
	CGGCGACTCTGGACGCGAGCCGGGCCCTTCC
	CGGCGACTCTGGACGCGAGCCGGGCCCTTCCC
	CGGCGACTCTGGACGCGAGCCT
	CGGCGACTCTGGACGCGAGCCGG
	CGGCGACTCTGGACGCGAGCCGGGCCCTTCCCG
	CGGCGACTCTGGACGCGAGCCGGGCC
	CGGCGACTCTGGACGCGCGCCGGGCCCTTCCCGTGGATCGCCC
a	AGGATCTGGCGTTGCCG
	AGGATCTGGCGTTGCCGTGAGC
	AGGATCTGGCGTTGCCGTG
	AGGATCTGGCGTTGCCGTGAGCTGTGGTG
	AGGATCTGGCGTTGCCGTGAGCTGTGGTGTAGG
	AGGATCTGGCGTTGCCGTGAGCTGTGG
	AGGATCTGGCGTTGCCGTGGGC
	AGGATCTGGCGTTGCCGTGAG
	AGGATCTGGCGTTGCCGT
a	GGGTCGGGGCGGGGCGGACTG
	GGGTCGGGGCGGGGCGGACTGT
	GGGTCGGGGCGGGGCGGACTGTCC
	GGGTCGGGGCGGGGCGGACTGTCCTC
a	TTGTGCTACGATCTGCTGAGGTTCAGCCTTTGTTCTCGGATTT
a	TCAGGCTCAGTCCCCTCCCGAT
	TCAGGCTCAGTCCCCTCCCGATT
	TCAGGCTCAGTCCCCTCCCGATA
	TCAGGCTCAGTCCCCTCCCGATTT
	TCAGGCTCAGTCCCCTCCCGATTA
	TCAGGCTCAGTCCCCTCCCGATC
	TCAGGCTCAGTCCCCTCCCGATTAG
	TCAGGCTCAGTCCCCTCCCGATG
	TCAGGCTCAGTCCCCTCCCGATAA
a	AACGAAAGTTAGGGGATCGAAGACG
	AACGAAAGTTAGGGGATCGAAGACGATCAG
	AACGAAAGTTAGGGGATCGAAGACGATCAGATA
	AACGAAAGTTAGGGGATCGAAGACGATCAGAT
	AACGAAAGTTAGGGGATCGAAGACGA
	AACGAAAGTTAGGGGATCGAAGACGATCA
	AACGAAAGTTAGGGGATCGAAGACGATC
a	ATTCAAGTAATCCAGGATAGGCT
	ATTCAAGTAATCCAGGATAGGCTA
a	AATACAAACCATGAAAGTGTGGCCTATCGATCCTTTAG
	AATACAAACCATGAAAGTGTGGCCTATCGATCCTTTAGTCCCT
	AATACAAACCATGAAAGTGTGGCCTATCGATCCTTTAGT
a	ATGAACCGAACGCGAGG
	ATGAACCGAACGCGAGGTTAAGGTGCCAGAGTAGACG
	ATGAACCGAACGCGAGGTTAAGG
	ATGAACCGAACGCGAGGT
	ATGAACCGAACGCGAGGTTAAGGTGCCAGAG
	ATGAACCGAACGCGAGGTTAAGGTGCCAGAGTAG
	ATGAACCGAACGCGAGGTTAAGGTGCCAGAGT
	ATGAACCGAACGCGAGGTTAAGGTGCCAG
	ATGAACCGAACGCGAGGTTAAG
a	TCACAGTGAACCGGTCTCTTTA
	TCACAGTGAACCGGTCTCTTTAA
	TCACAGTGAACCGGTCTCTTTAT
	TCACAGTGAACCGGTCTCTTTAG
a	CCCCCCCCAACCACGTTTGACTGACTG
	CCCCCCCCAACCACGTTTGACTGACTGT
a	TGGACGTTGGCTCTGGTGGTGA							IPA ID
	TGGACGTTGGCTCTGGTGGTGAT
a	ATCTCCAGTAGAACAAAAGGG
a	CAGTAATGCATTAAGCTAACCAGTACTAATTGCCCGTACGGCT
a	TGAGGTAGTAGGTTGTGT							IPA ID
	TGAGGTAGTAGGTTGTGTGGTT
	TGAGGTAGTAGGTTGTGTGGT
	TGAGGTAGTAGGTTGTGTGG
	TGAGGTAGTAGGTTGTGTGGTTT
	TGAGGTAGTAGGTTGTGTGGTTA
	TGAGGTAGTAGGTTGTGTGGTA
	TGAGGTAGTAGGTTGTGTG
	TGAGGTAGTAGGTTGTGTGGG
	TGAGGTAGTAGGTTGTGTGGTTAT
	TGAGGTAGTAGGTTGTGTGGTTTT
	TGAGGTAGTAGGTTGTGTGGTAA
	TGAGGTAGTAGGTTGTGTGT
	TGAGGTAGTAGGTTGTGTGGA
	TGAGGTAGTAGGTTGTGTGGTAT
	TGAGGTAGTAGGTTGTGTGGTTG
	TGAGGTAGTAGGTTGTGTGGTTATT
	TGAGGTAGTAGGTTGTGTGGTTAA
	TGAGGTAGTAGGTTGTGTGA
	TGAGGTAGTAGGTTGTGTGGGT
	TGAGGTAGTAGGTTGTGTGGTTTA
	TGAGGTAGTAGGTTGTGTGGTTAG
	TGAGGTAGTAGGTTGTGTGGTG
	TGAGGTAGTAGGTTGTGTGGTTTTT
	TGAGGTAGTAGGTTGTGTGGAA
	TGAGGTAGTAGGTTGTGTGGTTGT
	TGAGGTAGTAGGTTGTGTGGAT
	TGAGGTAGTAGGTTGTGTAGTT
	TGAGGTAGTAGGTTGTGTA
	TGAGGTAGTAGGTTGTGTGGGTT
	TGAGGTAGTAGGTTGTGTGGTAG
a	CACGCTCATGCACACACCCACA
	ACTTAGCTGTGCGAAACGGTCCTGTAAGCAGTAG
a	ACTTAGCTGTGCGAAACGGTCCTGTAAGCAG
	ACTTAGCTGTGCGAAACGGTCCTGTAAGCAGTAGAG
	ACTTAGCTGTGCGAAACGGTCCTGTAAGCAGT
	ACTTAGCTGTGCGAAACGGTCCTGTAAGCAGTAGAGTAGCCTT
	ACTTAGCTGTGCGAAACGGTCCTGTAAGCAGTA
	ACTTAGCTGTGCGAAACGGTCCTGTAAGCAGTAGA
	AAACTTTCAACAACGGATCTCTTGGTTCTGGCATCGATGA
a	AAACTTTCAACAACGGATCTCTTGGTTCTGGCATCGATG
	AAACTTTCAACAACGGATCTCTTGGTTCTGGCATCGATGAAAG
a	AACCTTCCTTGGATGTCTGAGTGA
	AACCTTCCTTGGATGTCTGAGTGAG
a	ATAGACGGACAAGAATAG
	ATAGACGGACAAGAATAGG
	ATAGACGGACAAGAATAGGCTTCG
	ATAGACGGACAAGAATAGGCTTCGGCTT
	ATAGACGGACAAGAATAGGCTTCGGCTTAGTG
	ATAGACGGACAAGAATAGGCTTCGGCTTAGT
	ATAGACGGACAAGAATAGGCTTCGGCT
	ATAGACGGACAAGAATAGGCTTCGG
	ATAGACGGACAAGAATAGGCTTCGGCTTAG
	ATAGACGGACAAGAATAGGCT
	ATAGACGGACAAGAATAGGCTTCGGCTTAGTGT
	ATAGACGGACAAGAATAGGCTT
	ATAGACGGACAAGAATAGGCTTC
	ATAGACGGACAAGAATAGGCTTCGGCTTA
	ATAGACGGACAAGAATAGGCTTCGGCTTAGTGTCTTAG
a	TCTCCCGCCCGTCGCCCGCGCG
	TCTCCCGCCCGTCGCCCGCGCGC
	TCTCCCGCCCGTCGCCCGCGCGCGCG
	TCTCCCGCCCGTCGCCCGCGCGCGCGCGCGCCCC
a	GTCCGCGCCCCCTCGCC
a	GCGCGCGTGCGCGTCGGGT
a	TAGGGGATCGAAGACG
	TAGGGGATCGAAGACGATCAG
	TAGGGGATCGAAGACGA
	TAGGGGATCGAAGACGATCAGAT
	TAGGGGATCGAAGACGATCAGATA
	TAGGGGATCGAAGACGATC
	TAGGGGATCGAAGACGATCA
	TAGGGGATCGAAGACGATCAGA
a	AACGTGGGCATTCGAATGTATCAACACTAGTGG
	AACGTGGGCATTCGAATGTATCAACACTAGTGGG
	AACGTGGGCATTCGAATGTATCAACACTAGTGGGCCATTTTTG
a	GTGGCTGTGGCATAGACCTCAG
	GTGGCTGTGGCATAGACCTCAGA
a	CATTGCACTTGTCTCGGTCT
	CATTGCACTTGTCTCGGTCTGA
	CATTGCACTTGTCTCGGTCTG
	CATTGCACTTGTCTCGGTCTGT
	CATTGCACTTGTCTCGGTCTGC
	CATTGCACTTGTCTCGGTCTGAA
	CATTGCACTTGTCTCGGTCTGAAA
	CATTGCACTTGTCTCGGTCTGAT
	CATTGCACTTGTCTCGGTCTGAG
	CATTGCACTTGTCTCGGTCTGTT
	CATTGCACTTGTCTCGGTCTGATT
	CATTGCACTTGTCTCGGTCTGG
	CATTGCACTTGTCTCGGTCTGTA
	CATTGCACTTGTCTCGGTCTGATA
	CATTGCACTTGTCTCGGTCTGAAG
	CATTGCACTTGTCTCGGTCTAA
	CATTGCACTTGTCTCGGTCTGAAGATCGGAAGCACACGTCTGA
	CATTGCACTTGTCTCGGTCTTA
a	TGTGCTACGATCTGCTGAGGTTCAGCCCGTGTTTCAAGATTTG
a	AGCTCTTTCTTGATTTTGTG
	AGCTCTTTCTTGATTTTGTGGGTGGTG
	AGCTCTTTCTTGATTTTGTGGG
	AGCTCTTTCTTGATTTTGTGG
	AGCTCTTTCTTGATTTTGTGGGTG
	AGCTCTTTCTTGATTTTGTGGGTGG
	AGCTCTTTCTTGATTTTGTGGGTGGTGGTG
	AGCTCTTTCTTGATTTTGTGGGT
	AGCTCTTTCTTGATTTTGTGGGTGGTGGTGCATG
	AGCTCTTTCTTGATTTTGTGGGTGGTGGT
	AGCTCTTTCTTGATTTTGTGGGTGGTGGTGCATGGCCGTTCTT
a	TCCCTGGTGGTCTAGTGGTTAGGATTCGGCGCTC
	TCCCTGGTGGTCTAGTGGTTAGGATTCGGCGCTCT
	TCCCTGGTGGTCTAGTGGTTAGGATTCGGCGCTCTCACCGCCG
	TCCCTGGTGGTCTAGTGGTTAGGATTCGGCGCTCTC
	TCCCTGGTGGTCTAGTGGTTAGGATTCGGCGCTCTCACC
	TCCCTGGTGGTCTAGTGGTTAGGATTCGGCGCTCTCACCGCAG
	TCCCTGGTGGTCTAGTGGTTAGGATTCGGCGCTCTCACCG
	TCCCTGGTGGTCTAGTGGTTAGGATTCGGCGCTCTCACCGCCA
a	CTGACCTATGAATTGACAGACA
