# Supplementary material for: The Swine Plasma Metabolome Chronicles "Many Days" Biological Timing and Functions Linked to Growth
Source: PLoS One. 2016 Jan 6;11(1):e0145919. doi: 10.1371/journal.pone.0145919 (PMC4703299; doi:10.1371/journal.pone.0145919)
Supplement: S11 Table — (XLSX) [file pone.0145919.s018.xlsx]

## Sheet: S11_Table
Table S11: Raw data are provided for serum metabolites following a multidien 5-day rhythm
(see Table S6; non-highlighted are day 2 acrophase group and highlighted are day 5 acrophase group)
Metabolite	14-Methylhexadecanoic acid	2-Aminoadipinic acid	5-O-Methylsphingosine (d18:1) (additional: Sphingolipids, erythro-Sphingosine (d18:1), threo-Sphingosine (d18:1))	Alanine	alpha-Tocopherol	Arachidonic acid (C20:cis[5,8,11,14]4)	Arginine	Asparagine	Cholesterol, free	Cholesterol, total	Cholesterylester C16:0	Cholesterylester C18:1	Citrate	Citrulline	Docosapentaenoic acid (C22:cis[7,10,13,16,19]5)	erythro-Dihydrosphingosine (d18:0)	Erythrol	Galactose, lipid fraction	Glycine	Hentriacontane	Heptadecanoic acid (C17:0)	Hypoxanthine (additional: Inosine)	Indole-3-lactic acid	Linoleic acid (C18:cis[9,12]2)	Lysophosphatidylcholine (C18:2)	Mannose	myo-Inositol, lipid fraction	Myristic acid (C14:0)	N,N-Dimethylarginine (ADMA)	Oleic acid (C18:cis[9]1)	Ornithine (additional: Arginine, Citrulline)	Palmitic acid (C16:0)	Palmitoleic acid (C16:cis[9]1)	Pantothenic acid	Phosphate, lipid fraction	Phosphatidylcholine (C16:0,C16:0)	Phosphatidylcholine (C16:0,C18:2)	Phosphatidylcholine (C16:0,C20:5)	Phosphatidylcholine (C18:0,C20:4)	Phosphatidylcholine (C18:0,C22:6)	Pinitol	Proline	Pyruvate (additional: Phosphoenolpyruvate (PEP))	Stearic acid (C18:0)	Sucrose	TAG (C16:0,C18:2)	TAG (C18:1,C18:2)	TAG (C18:2,C18:2)	Threonine
	0.167142	2.72366	0.801845	0.338318	0.547112	0.448111	0.475718	0.338075	1.07258	0.52622	2.25217	2.02959	0.208707	0.345984	0.301969	1.61912	0.327759	0.614348	0.41491	0.484519	0.206748	1.19563	0.808824	0.231329	0.210198	3.43412	0.271568	0.242641	0.622061	0.473362	0.419905	0.408224	0.350864	0.30807	0.472497	0.961722	1.31808	0.513854	1.03843	0.978328		0.389004	0.418605	0.411667	0.431129	0.40678	0.32783	0.211765	0.561072
	0.923243	0.0569853	0.739854	0.813374	1.03284	0.606082	0.889706	0.587524	0.855385	0.883662	1.21647	0.980695	1.02539	1.1543	0.578916	0.682979	1.12621	0.833211	0.760012	0.981647	1.31044	0.73216	0.471889	1.01435	0.938776	0.594127	1.00858	0.649928	1.05695	0.80022	1.07767	0.872527	0.844545	0.813406	1.02011	1.06915	0.934104	1.00704	1.1137	0.685816	0.974733	0.800527	1.00267	0.828993	0.608899	0.588983	0.600907	0.470389	0.696636
	0.487281	1.49419	0.584874	1.09689	0.780198	0.555172	0.558011	0.536715	1.00952	0.808174	2.00898	1.95652	0.642426	0.601518	0.456801	0.545329	0.92228	0.593471	0.779734	0.817262	0.522441	1.48057	1.02128	0.574821	0.31039	1.44972		0.820343	0.868871	0.72133	0.648267	0.605493	0.61687	1.29054	0.636867	0.867168	1.20737	0.61573	1.05109	1.13018	0.862244	0.612936	1.34733	0.474255	1.91387	0.823649	0.678161	0.797468	0.676201
	1.25199	1.71201	0.859369	1.18425	1.11857	0.949772	1.07418	1.55336	1.0303	0.988195	0.6956	0.791155	1.29162	0.971474	1.22203	1.00245	1.89051	1.3469	1.02832	1.03418	1.37915	0.69437	0.729805	1.34398	1.37787	0.271402	1.37908	1.46027	0.915441	1.12443	1.30654	1.29224	0.972949	0.981481	1.38612	0.975281	1.02207	1.02669	0.96069	0.883721	1.06272	1.33674	0.96766	1.23124	2.15274	1.26959	0.671858	1.27592	1.26557
	1.49732	0.123367	0.84951	1.16743	0.623955	0.743162	1.40326	1.18629	1.02484	0.907141	0.781739	0.778761	1.35706	1.16539	1.10405	0.720274	1.25926	1.06178	0.927397	1.45722	1.54926	0.872544	0.848101	1.23781	1.18079	0.272371	1.46692	1.13821	1.02834	1.05996	1.32153	1.18705	1.15303	0.357604	1.15414	1.50372	0.981221	0.985994	1.11216	0.602446	1.27038	1.42311	1.32134	0.985217	0.4875	1.09831	1.1701	1.18087	1.09463
	1.04395	0.153222	0.58759	0.95333	0.717152	0.583974	1.23894	0.973325	0.998193	0.758088	0.960048	0.805426	0.6265	0.849246	0.623711	0.587234	0.822785	0.795911	1.00402	0.810028	1.01818	0.911565	0.855802	0.882296	0.968271	0.607317	0.91535	0.540938	1.12945	0.756849	1.05261	0.764187	0.736085	1.06523	0.844202	0.987903	1.00871	0.887005	0.969509	0.657669	0.924757	0.905179	0.974429	0.781354	0.624125	1.15077	1.40692	1.24604	0.76061
	0.618228	0.208515	0.813114	1.28913	0.782979	0.900558	0.792727		0.773684	0.84023	1	1.33619	0.868379	0.754209	0.749372	0.744163	0.71564	0.977711	1.03543	0.805983	0.464762	0.752913	0.684091	0.736549	0.610635		0.845091	0.511844	0.567742	0.582009	0.816776	0.68304	0.884493	1.15923	0.706299	0.912371	1.01096	0.909853	0.997324	1.35404	0.57743	0.928902	1.02482	0.707859	5.82045	0.357808	0.232662	0.30669	0.733373
	0.99517	0.851693	0.730204	0.982315	1.17228	1.05831	1.03867	1.00674	1.22381	1.00993	1.61616	1.23478	1.18482	0.939279	1.36316	0.687835	1.41969	1.09434	1.0688	1.00568	1.37856	0.861676	1.02736	1.13539	1.12013	0.440607	1.1926	0.859415	0.930445	1.0628	1.1598	1.17621	0.880225	0.537162	1.28581	1.11278	0.912442	1.28539	1.02555	0.952663	1.19131	1.1455	0.899722	1.15034	0.559217	0.434251	0.397701	0.329958	0.976133
	0.126545	3.59549	0.829165	0.338705	0.541872	0.492974	0.534317	0.356368	1.06112	0.483572	2.25016	1.76889	0.215067	0.341164	0.3605	1.04078	0.348697	0.686234	0.443081	0.462614	0.281967	1.24727	0.78882	0.268323	0.32514	3.36657	0.329346	0.233582	0.550926	0.468978	0.369912	0.446066	0.340299	0.763784	0.535692	0.857143	1.12623	0.609244	0.758937	0.913165	0.0756103	0.493206	0.455153	0.472452	0.645606	0.42327	0.514412	0.276876	0.62963
	1.693	0.282939	0.833333	0.758796	1.23762	1.25762	1.17726	0.918393	1.00965	1.31103	0.867925	0.630267	0.744331	1.38762	1.2827	0.921167	1.20141	1.36064	1.05885	1.40824	1.5619	1.06058	0.845426	1.48328	1.28755	0.534648	1.17932	1.51868	1.60452	1.23839	1.14881	1.46938	1.15926	1.37241	1.2805	1.18106	0.93929	1.20623	0.988171	0.984	1.86542	1.03198	1.16205	1.3458	0.648684	1.09751	1.07995	1.18774	1.01557
		0.575937		0.49213	0.423867		0.505124	0.376456	0.890238		1.60107	2.07406	0.415735	0.55168			0.601046		0.631556			1.80567	0.725891		0.558629	2.88467			0.642237		0.528696			0.634652		1.16305	1.20646	0.534914	0.992085	0.571511	0.853477	0.435085	0.663224		4.55022	0.347441	0.383535	0.301494	0.536511
	0.363636	0.702776	0.618914	0.251458	0.935167	1.24631	0.624427	0.428997	0.688946	0.928923	1.06329	1.45877	1.1597	0.58512	1.309	0.590034	0.60251	0.532001	0.875438	0.934719	0.414025	1.07242	0.664474	0.660901	0.506073	2.06504	0.569179	1.34142	1.11847	1.39257	0.551859	1.14601	1.85866	1.78404	0.797308	0.859296	1.23077	1.00905	1.03934	1.15698		0.436893	0.645219	0.943427	3.24533	1.24217	1.14154	1.1354	0.938123
	1.7766	0.526142	1.10632	1.00363	1.01473	1.47997	1.14692	1.59255	0.950355	1.07587	0.465247	0.454861	1.39486	1.25075	1.14119	0.719022	1.20213	1.2499	1.11777	1.17488	1.36783	0.841847	1.07034	1.3873	1.46154	0.181901	1.49431	1.82859	2.05333	1.23299	1.47174	1.28478	1.12363	0.92228	1.24355	1.18367	0.971239	1.35747	0.96737	1.45455	1.61064	1.20566	1.07815	1.31443	0.899435	1.22105	1.32353	1.8092	1.43347
	1.63673	0.372456	0.749386	1.1246	1.17388	0.792902	1.2938	1.44024	0.979628	0.947054	0.689126	0.524876	1.46221	1.36606	0.762762	0.584712	1.25097	1.30592	1.20232	1.0436	1.84978	0.860922	1.09138	1.6514	1.18404	0.356101	1.67943	1.56782	1.04078	1.30286	1.32994	1.60271	1.42987	1.05648	1.26894	1.3458	0.909669	1.11036	1.01455	0.992189	2.03115	1.3295	0.937785	1.2821	0.875506	2.25259	2.18192	2.03237	1.09361
	1.50739	0.146568	0.854043	1.25573	1.00362	1.19553	1.20959	0.893628	1.01186	1.08389	0.956449	0.683849	1.39324	1.31421	1.26867	0.679767	1.7625	1.13271	0.980783	1.10689	1.90025	0.631789	0.633603	1.2367	1.312	0.84825	1.28668	1.1488		1.18563	1.24934	1.19043	1.19242	1.18065	1.18493	1.315	0.943262	1.2973	0.971098	0.95	1.42019	1.27491	1.08216	1.1334	2.15403	1.12914	1.1419	1.22712	0.924081
	0.777737	0.126504	0.573526	0.956598	0.947702	0.441657	0.794007	0.739253	0.76378	0.639984	0.772878	1.06923	0.817431	1.27561	0.522236	0.579352	0.985075	0.575559	1.01635	0.661742	0.668672	1.03587	0.524615	0.668529	1.19497	0.582889	0.571827	0.453113	1.28	0.467994	0.926826	0.534814	0.389972	0.660538	0.656778	0.876957	1.01822	0.825301	1.07335	0.846906	1.29812	0.823169	0.74095	0.537527	0.636735	0.576098	0.594298	0.503106	0.67063
	1.11697	0.254282	0.957296	0.602663	0.994819	1.40899	0.82	0.486311	1.12653	1.12271	0.8	0.786378	1.23007	1.14662	1.25714	0.752424	0.988372	1.29987	0.899471	1.10629	1.24914	0.715688	0.671463	1.16875	1.04636	0.531081	1.36121	1.19929	1.10333	1.24997	0.8409	1.22884	1.06955	1.02256	1.25334	0.992771	1.00482	1.26562	0.969524	1.24458	0.928683	0.638111	1.10242	1.37049	0.676845	1.02179	0.728754	1.04225	0.547746
	1.57386	0.211841	0.804635	1.06237	1.18702	0.997726	1.42143	1.16287	0.877863	0.936693	0.745833	0.634638	1.32369	1.44014	1.09407	0.514932	1.41667	1.0959	1.18907	0.909331	2.04006	0.740903	0.914826	1.20043	1.08571	0.430666	1.39592	1.15105	1.61219	0.997842	1.22539	1.09145	0.948326	0.908397	1.07632	1.16442	0.978482	1.05138	1.01555	1.16605	1.6708	1.21413	1.02969	1.10904	1.01639	1.19678	1.21592	1.15385	0.936808
	1.01256	0.783729	0.557373	0.755875	0.946535	0.799602	0.922652	0.823596	0.766667	0.93136	1.13356	1.02174	1.0376	0.857685	0.724869	0.542305	1.22798	1.05963	1.05348	0.851884	1.37072	0.752228	0.881459	0.96099	0.827922	0.391674		0.856166	0.656784	0.925696	0.84874	0.996115	0.853983	0.434459	1.47569	0.932331	0.93318	1.34382	1.0438	0.64497	0.9269	0.957369	0.981957	0.874841	1.51582	0.72579	0.726437	0.835443	0.878152
	1.15778	0.132433	0.937614	0.856195	1.01606	1.35469	1.18519	0.903998	0.828283	1.00409	0.764302	0.790055	1.32849	1.2987	0.952726	0.710175	1.07092	1.20749	0.9754	0.975934	1.36356	0.673173	0.790451	1.22112	1.55556	0.260043	1.5932	0.900446	1.22029	1.19362	1.16665	1.22211	0.813973	0.951965	1.41836	0.885993	0.932966	1.09855	1.01616	1.0721	1.77815	1.03332	1.09889	1.34655	1.47132	0.628083	0.60531	0.601361	0.845094
	1.39218	0.20338	0.604337	0.975625	0.765625	0.92924	1.41049	0.946935	0.965278	0.996773	0.872527	0.602878	1.33018	1.11301	1.19963	0.408776	0.857143	0.94746	1.08987	0.981735	1.51207	0.985468	1.03553	1.15161	1.07224	0.70509	1.31148	1.22523	1.32886	1.04647	1.22564	1.15257	0.844278	0.578699	1.13616	1.12299	0.94725	1.02703	0.933707	0.806667	1.64505	1.03395	0.903758	1.01704	7.36204	1.17255	1.20661	1.34906	1.0409
	0.671178	0.178734	0.678081	0.694979	1.0212	0.818096	0.668731	0.675411	0.902439	0.932958	1.28999	1.49675	0.794812	0.974039	1.25217	0.654037	0.633229	0.85061	0.873972	0.951325	0.729302	0.829197	0.628013	0.789234	0.703097		0.78837	0.564416	0.870159	0.707093	0.879849	0.641491	0.689628	0.856849	0.854676	0.979592	1.13397	0.825397	1.05736	1.16992	0.721907	0.666998		0.856827	0.538462	0.616883	0.615741	0.556068	0.515626
	1.57318	0.144381	0.783671	0.870016	1.04332	0.674777	1.1447	0.869038	0.871711	1.05601	0.5857	0.755437	1.01936	1.15168	0.837827	0.637254	1.16144	0.849982	0.856503	1.03195	2.05199	0.82478	0.695168	1.14928	1.50546	0.534931	1.00563	0.915395	1.14741	0.884732	1.15711	0.932179	0.745107	0.576148	0.888012	1.06824	0.978992	0.829681	0.977703	0.796866	1.47378	0.919518	0.759538	0.923958	5.8847	0.744371	0.8269	0.819751	0.811276
	1.2874	0.112733	0.508783	1.21138	1.03211	0.867157	1.25356	1.31631	0.773893	0.92608	0.732265	0.523757	1.57549	1.04069	0.803821	0.368772	1.24113	0.980239	1.11484	0.811007	1.55713	0.679337	0.917772	1.08039	1.09485	0.133204	1.2874	1.19301	1.32174	1.15747	1.21653	1.14599	1.15172	0.89083	1.23179	1.11401	0.980716	0.988691	1.01939	1.21003	1.45979	1.19324	0.981078	1.05525	1.64921	2.03036	1.87611	1.17823	1.03069
	0.211485	2.70225	1.1287	0.351405	0.512733	0.552086	0.413839	0.382411	1.02622	0.648895	1.02905	1.79618	0.207599	0.330435	0.379899	1.96469	0.425532	0.688166	0.408216	0.729113	0.263429	1.27883	0.889976	0.290255	0.121173	3.4263	0.294278	0.323308	0.518741	0.574393	0.424656	0.491598	0.637078	0.429482	0.60163	1.11899	1.21759	0.691756	1.01771	1.04532		0.371159	0.470944	0.439853	0.840206	0.652005	0.451935	0.372932	0.574435
	0.685199	0.281291	1.09739	0.618914	0.687392	0.5446	0.855	0.557875	0.873469	0.715009	1.3253	1.28173	0.426459	0.755048	0.480144	0.721053	0.511628	0.533532	0.710038	0.673199	0.755673	1.01154	0.70024	0.577363	0.609272	1.56489	0.410267	0.582539	0.946667	0.701175	0.716778	0.606024	0.621749	1.11278	0.615376	0.959036	1.10361	0.854167	0.908571	0.519505	0.467465	0.627214	0.901548	0.611048	0.631043	1.122	1.17346	1.04577	0.757543
	0.99687	0.636873	0.741946	0.755746	0.905512	0.722798	1.21538	1.05026	0.730392	1.00758	1.01384	0.966443	0.872534	0.951855	0.690233	0.644549	1.50437	1.10853	0.920137	1.00986	1.31578	0.975635	0.924658	0.956375	1.09827	0.300693	0.870239	1.12651	0.991453	0.958878	0.877591	1.01787	1.09337	0.621754	1.10986	0.886311	0.983425	1.03145	1.05158	0.534959	0.83045	0.932058	0.830668	0.84343	1.21249	1.07909	1.13054	1.1125	0.929529
	0.929884	0.241562	0.876368	0.995484	0.749591	0.922884	1.38389	0.914397	1.02837	0.886331	1.08969	1.11806	0.75296	0.955224	1.03775	0.970529	1.20213	0.951531	0.890154	0.895801	0.881001	1.41323	1.00073	0.856566	1.47009	0.55307	0.896741	0.653717	1.28	0.669532	1.07066	0.675005	0.655393	1.05907	1.16757	0.857143	1.14381	0.806335	0.961612	1.20949	1.11942	0.89651	1.15879	0.898833	0.691525	0.781053	0.807692	0.831346	0.846295
	0.996236	1.02479	0.737122	0.702967	0.708397	0.514159	0.966292	0.958522	0.69969	0.632152	0.920666	0.819905	0.460489	1.02802	0.418869	0.68139	0.907801	0.479366	0.870109	0.64071	0.704101	1.01276	0.746667	0.576131	0.928302		0.500372	0.566139	1.31975	0.574571	0.951675	0.582154	0.595576	0.965699	0.624129	1.04178	1.0771	0.682836	1.06955	1.00361	1.47439	0.791978	0.933526	0.545679	0.86071	1.14815	1.10168	1.10423	0.972125
	0.983305	0.167849	1.08483	1.32591	1.17447	1.02544	1.36	1.32045	0.968421	0.941298	1.14876	1.30621	1.24712	1.2413	1.25181	0.647059	0.729858	0.964701	0.969546	0.95948	1.07165	0.599561	0.916667	1.03438	1.04288		1.33188	0.713398	1.44839	0.788692	1.21613	0.824368	0.534401	0.599702	0.981898	0.984536	1.02851	0.721174	0.884924	0.993789	0.894749	1.04796	0.959927	1.03442	1.26887	0.469493	0.765101	0.744425	0.730799
	1.13655	1.22625	0.815397	1.17133	1.26953	0.992605	1.48993	1.56161	1.09007	0.950298	1.13523	1.07097	1.63222	1.02011	0.979779	0.746545	1.30594	1.21116	1.26705	0.93699	1.23472	0.861907	1.24601	1.21088	1.14872	0.327751	1.27352	1.01508	1.38698	0.955019	1.11052	1.0131	1.15552	1.3961	1.10916	1.18563	0.951249	1.11392	0.919786	1.14535	1.02217	1.23378	1.05849	0.991935	1.36409	1.05979	1.13354	0.866995	1.22776
	0.978488	1.006	0.655426	0.857324	0.69577	0.549514	1.06484	0.793331	0.773666	0.693919	0.927894	1.02523	0.539286	0.915177	0.475946	0.571079	1.02427	0.540025	0.921211	0.692384	0.724493	1.32901	0.846297	0.603168	0.873401	1.29816	0.517616	0.453967	1.04381	0.621991	1.06723	0.556048	0.577247	0.84044	0.678223	0.885216	1.07323	0.746359	1.01426	1.04338	1.42544	0.841149	0.906842	0.553419	0.759062	0.980572	1.05594	0.809937	1.00099
	1.72172	0.0879883	0.597384	1.20436	1.03158	0.796894	1.26844	1.1705	0.965517	0.927782	0.711063	0.457211	1.2511	1.33603	0.893983	0.717833	0.794595	0.914247	0.931406	0.886225	1.18096	0.865804	0.954733	1.26128	1.15385	0.242281	1.12064	1.28089	1.14201	0.997699	1.26491	1.08863	1.02394	1.08893	1.0794	1.28141	0.9383	1.09091	1.07925	0.946372	1.28249	1.16421	1.00495	0.956618	0.840215	1.26518	1.31011	1.66327	0.955382
	0.297179	2.61316	0.676616	0.542554	0.462898	0.631892	0.5387	0.409492	0.795122	0.671774	1.72343	2.04338	0.546392	0.456906	0.425336	1.15282	0.77116	0.669484	0.345321	0.661836	0.339752	1.15853	0.827362	0.455301	0.520947			0.567508	0.599089	0.792793	0.413007	0.647751	0.830882	0.22966	0.699673	0.734694	1.2488	0.619048	0.961759	0.562674	0.218502	0.291844		0.617531	0.927961	0.699134	0.49537	0.29063	0.738521
	1.05808	1.84015	0.611991	1.109	1.55506	0.87378	1.00277	1.45897	1.23256	1.10228	1.49384	1.32	1.21711	1.17994	0.9911	0.734284	1.59452	1.32777	0.936363	1.20068	1.21428	0.760817	0.957983	1.28889	1.52209	0.168499	1.32299	1.21087	0.752399	0.996576	1.14491	1.21031	0.893877	1.52941	1.19288	1.11737	0.930394	1.31532	0.774	1.06993	1.35751	1.32881	1.09109	1.12063	31.1286	0.979263	1.04099	1.09797	1.11042
	0.582482	0.156319	0.595282	0.740723	0.674095	0.771054	0.899767	0.597508	0.84472	0.726691	0.930435	0.99115	0.568182	0.882103	0.987957	0.697434	1.00617	0.766306	0.608396	0.704876	0.962364	1.04654	0.740506	0.599358	0.706215	0.930902	0.714476	0.510199	1.05533	0.542621	0.92186	0.59544	0.551816	0.767742	0.775337	0.952854	1.10094	0.879552	1.00094	1.50459	0.732496	0.693011	1.01314	0.68559	1.16544	0.470705	0.485374	0.442451	0.688785
	0.777172	0.863663	0.628212	0.922249	0.879279	0.876122	0.859107	0.940327	0.979381	0.909071	1.15643	1.1349	1.0481	1.06429	1.13373	0.451997	0.90301	1.0306	1.21856	0.888567	0.897223	0.75567	0.891026	0.985383	0.972777	0.483598	1.28328	0.856441	1.0692	0.924033	1.03248	0.997125	0.861964	0.784566	1.12078	0.792929	1.09242	1.41089	1.01079	0.849057	0.540361	1.0561	0.933643	0.979212	0.480659	0.5	0.397849	0.0830428	1.03364
	0.816457	0.819153	1.38834	0.757741	0.784029	0.544174	0.876147	0.836297	1	0.711117	1.25681	1.67713	0.522378	0.781089	0.365066	1.05666	0.940828	0.565689	0.811716	0.699409	0.662976	1.32465	0.737313	0.542173	0.476628	1.45735	0.456313	0.482235	0.984397	0.545453	0.842398	0.521944	0.613259	1.0405	0.598996	1.12102	1.10638	0.713934	0.948244	0.697976	0.779211	0.687077	0.878316	0.502376	1.29765	0.858369	1.07914	1.03125	0.853626
	0.919936	0.270302		1.7945	0.8519	0.789104	1.39104	1.43261	0.864686	0.750986	0.887435	0.7625	1.0252	0.996289	0.924502		0.909091	0.899033	0.882139	0.7658	1.35899	1.11788	0.868056	0.776951	1.19033	0.273026	0.946338	0.583637	1.36331	0.671901	1.41879	0.787829	0.851095	0.522568	0.920963	0.969412	1.08115	1.11538	1.03565	1.5473	1.08322	1.47589	1.44395	0.802486	18.8961	0.690476	0.722689	0.6	1.16373
	1.06069	0.482452	1.16884	0.694905	0.693846	0.89373	1.06071	0.589172	0.920961	1.02719	1.08186	1.00852	0.922592	1.0718	1.10064	0.715226	0.991041	0.84968	0.972578	1.07834	1.22025	1.39471	0.720361	1.0104	1.08102	1.21246	0.99343	0.95569	1.2035	0.894238	0.984633	0.952978	0.75814	0.836189	1.03997	1.22766	1.01129	0.714614	1.02252	0.911153	1.19115	0.842683	0.951045	0.856414	0.578961	0.926425	0.983101	1.06444	0.930818
	1.02578	1.15025	0.933876	1.0098	0.904908	0.69741	0.986014	0.709193	1.1963	0.895532	2.19658	2.08734	0.924719	0.887218	0.823267	0.683209	0.794224	0.881402	0.946081	0.938575	1.01993	1.02352	0.677966	0.928261	1.12608	0.972086	1.10216	0.562973	1.6046	0.681748	0.819631	0.708542	0.441572	0.494167	0.85974	0.930337	0.984394	0.914611	1.00092	0.892308	0.894023	0.949916	0.863226	0.815943	0.932398	0.160113	0.163121	0.149575	0.863704
	0.191558	4.37408	1.70133	0.383878	0.679831	0.46821	0.425688	0.368982	1.51746	0.628146	1.31188	1.32673	0.325044	0.4	0.335971	1.63088	0.561265	0.476992	0.356182	0.568542	0.287966	1.26234	0.96756	0.266871	0.238298	3.93855	0.312609	0.333048	1.07317	0.441075	0.474161	0.474162	0.404847	0.765909	0.611636	0.996865	0.747519	0.128053	0.880515	0.279692	0.045045	0.435926	0.996046	0.455955	23.0121	0.647059	0.581545	0.355487	0.736489
	0.323733	2.39679	1.43742	0.39341	0.789223	0.962466	0.662172	0.37094	1.16535	0.788292	0.83903	1.33077	0.305051	0.487805	0.642187	2.31837	0.425373	0.806248	0.404621	0.824874	0.387181	1.32555	1.11538	0.458931	0.452201	3.02404	0.491099	0.673132	0.693333	0.944389	0.406987	0.773977	1.00635	0.701248	0.805439	1.03356	1.17768	0.662651	0.963788	1.03583	0.0557164	0.45923	0.546815	0.722147	2.01224	1.09908	1.11623	0.962733	0.956205
	0.616827		0.963731		1.02632	0.686091	0.992042		1.09416	0.771599	1.56706	1.33974		0.936687	0.622629	0.970467		0.83144		0.68787	0.539257		0.591098	0.567301	0.584946		0.560802	0.69161	0.832041	0.588443		0.670424	0.909248	0.726708	0.741896	1.04734	1.09786	0.974441	1.02593	0.967742				0.558822		0.444934	0.687923	0.929961
	1.48037	0.852835	0.831592	1.08178	1.12883	0.862114	1.00699	1.07867	0.988453	1.0166	0.769231	0.620087	1.45717	0.928571	0.791517	0.603845	1.3574	1.20579	1.01553	0.976726	1.60134	0.703443	0.887006	1.26469	1.22625	0.186653	1.4039	1.04668	1.10805	0.926409	0.988945	1.07649	0.872231	0.485	1.09644	1.02022	0.919568	1.08918	1.03779	0.779487	1.02711	1.23713	0.915699	1.1315	0.850765	1.09125	1.18946	1.12748	0.973381
	0.952573		0.364213		0.916571	0.760342	1.25234		0.770311	0.800299	0.961039	0.875		1.15681	0.86412	0.396243		0.805409		0.835679	1.43381		0.914826	0.836158	1.11111		0.953912	0.766034	0.723468	0.77642		0.817463	1.01982	0.850552	0.862431	1.01484	0.977376	1.10204	1.00894	1.48882				0.821638		1.57988	0.835329	0.597368
	1.41903	0.301325	0.998101	0.779637	1.24956	1.05966	1.02994	0.991622	0.891304	1.04622	0.844391	0.839876	0.921835	1.25629	1.03446	0.839894	1.9697	1.07552	0.873426	1.10583	1.0615	1.11007	1.10791	1.13271	0.795775	0.484673	0.950228	1.08174		0.964843	1.00999	1.01166	1.18319	2.2605	1.19335	1.09392	1.05615	1.02422	0.927323	0.734982	2.31143	1.06008	0.870404	0.968029	2.44125	0.815654	0.883117	0.867395	1.01572
	0.786639	0.146776	1.10112	1.06195	1.04845	0.954595	1.00741	0.817391	1.38248	0.871509	0.846743	1.1029	0.704701	1.00336	1.43017	1.21102	0.694737	0.829119	0.768168	0.897888	0.509867	0.827105	0.953678	0.662825	0.733813		0.536218	0.514803	1.02045	0.647166	0.94611	0.549179	0.617832	1.40741	0.751436	1.0033	1.09695	0.871875	0.961758	1.48105	0.666404	0.840922	0.795429	0.835495	0.595989	0.673841	0.899628	1.18689	0.582923
	2.10207	0.102629	0.5439	0.894713	0.964942	1.0016	1.24211	1.08274	0.939189	1.08856	0.424965	0.469636	1.2796	0.940828	1.04806	0.68773	0.940541	0.959727	0.997556	1.11676	1.81733	0.683948	0.700885	1.34888	1.17377	0.480855	1.58513	1.67295	0.888889	1.3409	1.06572	1.31723	1.1167	1.27886	1.27539	1.10649	0.932106	1.07541	1.02193	0.563636	1.69508	0.980295	1.31048	1.32053	1.77405	1.25824	1.26049	1.66723	0.805021
	2.05044	0.172499	1.16553	1.19654	1.19757	1.60605	1.45902	1.65323	1.05926	1.22121	0.604557	0.59451	1.5769	1.51948	1.24185	0.821521	0.969359	1.31635	1.25633	1.2897	1.4207	0.735136	0.757475	1.71351	1.57419	0.356244	1.7276	1.91855	1.12821	1.36337	1.29576	1.4002	1.21005	1.33281	1.19562	1.1831	0.950935	1.01493	0.921201	1.18806	1.4382	1.2708	1.0856	1.39824	0.774825	1.17053	1.18966	1.97956	1.3194
	0.697541	1.25683	0.627321	0.540492	0.88716	0.464018	1.13081	0.619611	0.762887	0.686818	0.779221	0.819905	0.524857	0.9375	0.497462	0.634611	1.20446	0.792424	0.848765	0.623124	0.88587	0.997426		0.652031	0.969298	0.60429	0.427732	0.818037	1.16588	0.687749	0.802313	0.689141	0.733869	0.655738	0.64764	0.987069	1.07277	0.843049	1.02326	0.451095	1.75564	0.692197	0.810923	0.547758	0.568598	0.906844	0.786681	0.722892	0.786659
	0.91793	1.02767	0.793548	1.28609	0.939551	0.622042	1.855	1.43887	0.922449	0.790519	1.46185	1.11455	0.691044	1.30114	0.653729	0.63971	0.906977	1.07515	0.859375	0.784244	0.787761	0.906492	0.968825	0.942926	1.17881	0.327912	0.927757	0.628653	1.65667	0.627688	1.63076	0.839072	0.803942	1.40602	0.700475	1.17108	1.06265	1.09375	1.08	0.873065	1.22436	1.20229	0.789202	0.698677	0.498728	0.651416	0.7078	0.616197	1.10011
	1.41735	0.551839	0.950074	1.37212	1.23359	1.05418	1.04698	1.24212	1.05855	1.00073	0.597357	0.690402	1.17681	0.847107	1.27778	0.705541	0.92	1.02582	1.10675	0.984589	1.46302	0.662786	1.02624	1.30481	1.22101		1.2296	1.26183	0.73913	1.17671	1.13827	1.23779	1.16752	1.30159	1.14566	0.853392	0.953162	1.15094	1.02831	0.913514	1.05506	1.33573	1.11938	1.22754	0.632425	1.1285	1.21118	1.42508	1.0935
	1.92672		0.724133		1.06316	1.20662	1.01857		1.18644	0.876829	0.625882	0.478846		1.05464	0.672171	0.578589		1.08982		0.872207	1.30575		0.72997	1.15609	0.95914		1.43546	1.76155	1.46253	1.27573		1.14736	1.12043	1.09938	1.07436	1	1.02889	0.980831	0.975689	1.53548				1.15444		1.96476	1.62126	2.46693
	1.44559	0.136536	0.672394	0.935788	0.967164	0.857777	0.967901	1.00631	0.961538	0.914635	1.12077	0.743662	1.38428	0.952468	1.01044	0.483547	1.0684	1.10786	1.30274	1.06388	1.10372	0.839228		1.08754	1.0049	0.441135	1.21761	1.23804	1.28139	0.931714	1.00246	1.2059	0.943692	1.37365	1.10343	1.35885	1	1.19088	1.02053	0.602985	1.02613	1.03131	1.14729	0.894797	1.75092	1.09247	1.17004	1.23338	0.923918
	0.814662	2.1996	0.682077	1.15847	1.46966	0.933592	1.27978	1.30803	1.28488	0.933758	2.00145	1.42667	1.36132	0.936087	1.08152	0.548257	1.15616	1.21592	1.287	0.961285	0.953774	0.59964	1.27731	1.02192	1.29719	0.292961	1.10694	0.560957	0.879079	0.854231	1.26439	0.977154	0.883103	1.42081	1.02165	1.08451	0.87471	1.32432	1.114	1.0979	0.978942	1.30309	1.09786	0.960904	1.34263	0.735023	0.544099	0.71719	1.28929
	0.99447	0.988975	0.728332	0.713791	0.801314	0.575709	1.35055	0.844297	0.845966	0.767734	0.785669	0.737778	0.531505	0.868233	0.418859	0.897951	1.02605	0.947278	0.818932	0.784417	0.966965	1.12719	0.863354	0.851756	0.89013	0.328979	0.77685	0.982688	0.935185	0.833058	1.11857	0.860417	0.965798	0.737086	0.811489	0.990148	0.906696	1.10924	1.04308	0.495238	1.1765	0.878761	0.708038	0.760983	0.718131	1.13541	1.18182	1.01991	0.879695
	0.112897	1.32165	1.33259	0.495103	0.713235	0.683285	0.458357	0.274401	1.09302	0.621885	2.73629	2.46186	0.309128	0.430862	0.618391	2.23022	0.577259	0.809006	0.70337	0.625329	0.201906	0.885791	0.513158	0.317666	0.463373	3.19636	0.345082	0.249088	0.722814	0.586369	0.318611	0.489808	0.403681	0.93426	0.59628	0.898396	1.18894	0.477842	0.961913	1.18072	0.113987	0.408434	0.662428	0.559755	1.45864	0.517954	0.390356	0.357595	0.560238
	0.229737	3.26187	1.39878	0.450523	0.638158	0.670128	0.64186	0.373233	1.33051	0.779842	1.8108	1.79389	0.258096	0.333648	0.439841	2.05288	0.421405	0.696796	0.254712	0.874593	0.314977	1.2752	1.1666	0.37965	0.123077	2.92216	0.367535	0.453619	0.578113	0.798004	0.414575	0.661859	0.796331	1.18189	0.571636	1.11005	1.27599	0.484984	1.04762	0.858086		0.376047	0.664914	0.478856	0.548341	1.07541	0.959816	0.694444	0.803922
	0.360645	0.493143	0.627544	0.712208	0.600733	0.392348	0.737481	0.58319	0.923729	0.593274	1.69297	1.74615	0.341824	0.705252	0.293252	0.540448	0.543353	0.661657	0.669228	0.527354	0.30041	1.12106	0.691696	0.349995	0.717105	1.13589	0.398534	0.319388	1.19588	0.436154	0.577513	0.436583	0.573776	0.963134	0.545618	1.31873	1.12963	0.636086	1.03779	0.53945	1.04642	0.570173	0.939906	0.38611	0.457278	0.735707	0.742407	0.6144	0.896491
	0.748065	0.095449	0.823192	0.679155	0.711821	0.433503	0.909363	0.781111	0.90519	0.711352	0.894687	1.00314	0.644083	0.844291	0.470255	0.559517	0.838128	0.782722	1.1673	0.709279	0.645399	1.35643	0.815698	0.66258	0.888428	0.953206	0.395024	0.56347	1.03293	0.579527	0.870994	0.69	0.674975	1.04364	0.773701	1.34368	0.971134	0.767594	0.991883	0.454814	1.03201	0.824501	0.971853	0.463319	0.849555	0.993267	0.957352	1.24733	0.785379
	0.662426	0.182668	0.832497	1.18163	0.848024	0.912371	1.05483	0.885356	1.00806	0.858831	1.73043	1.60947	0.707426	1.09974	1.15854	0.90235	0.77592	0.861814	0.717729	0.799457	0.461519	0.974839	0.803922	0.634332	0.86119	0.450499	0.579324	0.366166	1.01627	0.594774	0.881803	0.491331	0.625876	1.10877	0.749175	0.870813	1.08238	0.720403	0.916589	1.4613	0.750087	0.842092	1.03684	0.782956	0.850551	0.698305	0.766509	0.752941	0.67905
	1.41053	0.275082	0.801938	1.44123	0.880734	1.17785	1.65812	1.61074	0.604507	1.07835	0.832952	0.740331	1.75995	1.74892	1.16851	0.52924	1.04255	1.12937	1.26362	1.03261	1.41951	0.930012	0.965517	1.20091	1.47967	0.198966	1.49979	1.19091	1.26957	1.18461	1.59819	1.21843	1.20091	1.44105	1.22751	1.19218	0.97337	1.063	1.00323	0.871473	1.43298	1.22757	1.48554	1.11704	1.77556	0.8463	0.923894	0.677551	1.07371
	0.879856	0.110286	1.07587	1.25252	0.908425	0.953219	1.10268	1.21518	1.27966	0.96234	1.04591	1.36154	0.769104	1.30761	1.07321	1.14792	0.878613	0.933848	0.815256	0.946101	0.571272	1.18409	0.833922	0.77584	0.613816	0.547045	0.728287	0.552229	0.845361	0.665733	1.12262	0.605543	0.613393	1.34255	1.02029	0.919708	1.27778	0.422018	0.988018	1.0948	1.11509	0.956228	0.786854	0.907349	0.387743	0.539374	0.710911	0.8288	0.758242
	1.1214	0.221537	0.673799	1.18731	1.0206	1.03725	1.78277	1.67449	1.01575	0.832712	0.783903	0.876923	1.36283	1.19756	0.988576	0.643328	1.01493	1.11363	1.1543	0.799322	0.823545	0.941019	0.815385	0.921627	1.18239	0.268669	1.2147	0.817765	1.45067	0.679987	1.22315	0.735275	0.533173	0.849639	0.961964	1.10962	0.924829	0.76506	0.948932	1.41368	1.8097	1.07511	0.943984	0.971774	1.10204	0.966292	1.06798	1.0528	1.03627
	1.03588		0.899225			0.534958	1.17681			0.935429	1.41742	1.00322		1.42171	0.460405	0.672028		1.06711		0.951648	0.867003		0.989761	0.91357	1.18346		0.806586	0.658533	0.89697	0.655325		0.759333	0.58509	1.46939	0.894437	1.23899	1.01771	1.02484	1.01068	0.788235				0.690457
	2.18651	0.966605	0.934035	1.25239	1.11957	1.34003	1.88738	1.8013	1.14625	1.20716	0.623116	0.624284	1.65121	1.19166	1.67759	0.730483	1.5375	1.0552	0.854363	1.29273	1.17463	0.86097	1.45749	1.46476	1.384	0.357111	1.45959	1.33383		0.997462	1.41685	1.02774	0.960114	1.55	1.26344	1.065	0.931442	1.01351	0.930636	1.24375	2.05577	1.34263	0.809627	1.41841	0.816626	1.21878	1.3162	1.42373	1.21436
	1.7284		1.00168		1.00893	1.07845	1.17403		1.17681	1.2811	0.82069	0.746188		1.3075	1.48969	0.66387		1.14735		1.32966	1.7101		0.862745	1.48865	1.04151		1.38305	1.29251	0.822394	1.58346		1.34425	1.19953	1.13267	1.22017	0.655462	1.07834	0.881226	1.11579	0.745387				1.29691		1.19196	1.08806	1.32437
	1.09962	0.132602	0.705632	0.837817	0.785276	1.10008	0.972028	0.920575	0.965358	1.02922	0.957265	0.561863	0.819152	0.947368	1.17152	0.523471	0.722022	1.00533	0.880735	0.999976	1.31438	0.723812	1.0678	0.964655	0.71848	0.377316	1.09769	0.960916	1.10345	0.916044	0.925138	1.0338	0.790257	0.6925	0.90375	0.952809	0.9988	0.933586	0.960369	0.815385	1.03081	0.846381	0.784516	1.04582	1.98469	0.89746	0.915907	0.932011	0.785102
	0.723386	2.24762	1.20828	0.691883	1.1341	0.642756	0.996139	0.713834	0.933673	0.730676	1.19945	1.26512	0.690808	1.02778	0.554125	0.968782	0.811111	1.1099	0.777404	0.707359	0.864019	1.06507	0.84252	0.723319	1.53267	0.452741	0.512154		1.11521	0.623492	1.23677	0.730369	0.584443	1.02885	0.94495	1.12389	0.981595	0.792308	1.02683	0.789286	1.14126	0.946743	1.13237	0.67643	0.55	0.40814	0.380986	0.470195	0.955801
	0.878627	0.160159	0.780663	0.690277	1.02455	0.922978	0.501422	0.486937	0.907801	0.941078	1.61435	2.18056	0.795427	0.737313	0.731597	0.54136	1.09574	0.827681	1.13012	0.969559	0.733726	1.30861	0.791878	0.903483	1.40171	1.37272	0.750294	0.653354	0.986667	0.66944	0.695294	0.705996	0.434186	1.27254	0.766862	0.96793	0.995575	1.00452	0.990403	1.03557	0.918432	0.702766	1.03233	0.717425	0.761582	0.747368	0.760181	0.804089	0.863281
	1.42984	0.111989	0.901997	1.2493	1.2228	1.06335	1.43	1.24912	1.06939	1.11978	0.775904	0.873065	1.02547	1.31343	1.16622	0.855679	1.13953	1.11938	0.842612	1.17765	1.52372	0.647494	0.853717	1.23122	1.0596	0.363126	1.18303	0.929233	1.17333	1.04978	1.45394	1.0726	0.947175	0.954887	1.12664	1.3253	1.03614	1.08333	1.0419	0.891641	1.28162	1.38178	0.77372	1.10805	0.480068	0.995643	1.01513	1.12324	1.03301
	1.44108		1.06822			1.42088	1.65797			1.04829	1.92192	1.13826		1.25445	1.04501	0.659485		1.18007		1.11266	1.11154		1.33106	1.3393	1.1938		1.48719	0.906137	1.55152	0.821761		1.01285	0.795319	1.20635	1.21682	0.924528	1.00093	0.897516	1.00082	1.01765				1.07647
	0.895044		0.919794		0.966226	0.641799	1.18797		0.828221	0.819106	2.14876	1.4502		1.13333	0.774965	0.744075		1.19352		0.902324	0.863256		0.964143	0.898692	0.96124		0.915532	0.579124	0.79596	0.612339		0.817377	0.664683	1.31938	0.898237	1.0565	1.10233	0.750853	1.13027	0.811189				0.692154		0.560825	0.551422	0.488673
	0.506706	0.273829	0.645135	1.33055	0.839695	0.912896	0.595302	0.934625	0.913349	0.669121	1.44493	1.66563	0.703865	0.882231	1.0054	0.511456	0.973333	0.560286	0.787444	0.757599	0.389944	0.822453	0.588921	0.48556	0.84058		0.595439	0.375076	0.993789	0.517444	0.799541	0.482551	0.630207	1.12169	0.599481	0.844639	1.22482	0.626415	0.975342	1.21081	0.806478	0.587591	1.34774	0.579068	0.577897	0.336232	0.356108	0.336391	0.784742
	1.39104	0.243347	0.897776	1.11421	0.614951	1.11682	1.22936	1.30158	1.09841	1.02655	0.44802	0.390099	1.27145	1.17742	1.48666	0.542965	1.13043	0.855776	0.850448	0.936413	1.65686	0.897143	1.13822	1.19691	1.10638	0.272112	1.28978	1.41059	1.1561	1.20968	1.14826	1.2692	1.07144	1.21818	1.1079	1.37304	0.901874	1.0231	0.990809	1.17224	1.54655	1.23556	1.29861	1.14346	0.896261	1.20798	1.25966	1.42813	1.22276
	1.22138	0.201593	0.597663	1.07278	0.925651	1.03161	1.16268	0.908152	0.842105	0.754095	1.02727	0.821053	1.13748	1.284	0.710094	0.434801	0.807547	0.915353	1.23011	0.784256	0.862792	0.795606	1.03205	0.821119	0.606474	0.676426	1.10065	0.83138	0.931245	0.796558	0.890625	0.761758	0.784583	1.51073	0.843014	0.922049	0.992991	0.94186	1.00725	1.29223	0.776563	0.894536	0.927325	0.878666	0.665056	1.13095	1.31126	1.39144	0.980798
	1.71429	0.128753	0.555465	1.2796	1.07504	0.687571	1.50299	1.30084	0.949275	1.06875	0.591074	0.722107	1.24979	1.2673	0.906267	0.578725	1.36364	0.96805	0.996283	1.09369	1.81807	0.913564	1.11511	1.15052	0.887324	0.327802	1.33464	0.937313		1.02144	1.42721	0.988071	0.953219	1.17647	1.37334	1.12707	1.04659	0.878893	0.931003	0.855124	1.27905	1.11899	1.03885	1.01362	0.749347	0.930999	0.97619	0.833073	1.01653
	0.129726	2.82291	0.878879	0.312782	0.662269	0.474762	0.441767	0.291548	0.990415	0.481395	1.79517	1.90871	0.194557	0.322034	0.354421	2.00788	0.407821	0.439794	0.37488	0.510709	0.251274	1.20076	0.858238	0.256747	0.231047	3.69361	0.263553	0.20257	0.741463	0.475687	0.477144	0.42237	0.440575	0.300251	0.500256	0.990741	1.2881	0.25755	1.00485	1.03205		0.356756	0.403912	0.405699	0.384764	0.570833	0.455142	0.295447	0.513875
	0.69206	0.220918	0.864063	0.961219	0.795455	0.82315	0.840093	0.662007	0.936082	0.842506	1.0431	1.03118	0.597029	1.17232	0.761466	0.880866	0.938111	0.58454	0.764675	0.806098	0.464362	0.913	1.19444	0.660958	0.618947	0.631545	0.602402	0.583711	1.5514	0.764637	0.981468	0.681999	0.800931	1.22443	0.736842	1.19121	1.10898	0.766355	1.00276	1.36919	1.12188	0.830642	0.863042	0.734207	1.02406	0.701685	0.918067	1.09091	0.669452
	1.30203	0.761813	0.725035	1.00826	1.25984	0.932084	1.21538	0.898528	1.01471	0.972825	0.729789	0.621924	1.29062	1.23441	1.06457	0.650148	1.55685	1.08079	1.08026	0.996267	1.48176	0.636081	0.952055	1.28993	1.1368	0.261133	1.30048	1.06392	0.92735	0.975455	1.02764	1.1336	0.889549	0.835088	1.11906	0.979118	0.895028	1.18239	1.02986	0.861789	1.04687	1.17231	0.816557	1.13882	0.708963	0.656555	0.916084	0.50625	1.05301
	0.172815	2.44722	1.10414	0.323339	0.551181	0.717196	0.445385	0.349552	0.77451	0.614865	1.86453	1.67785	0.261583	0.427782	0.692685	1.46504	0.495627	0.891783	0.551644	0.93379	0.29445	1.09927	1.06849	0.406911	0.527938	3.47021	0.319292	0.326096	0.457265	0.629452	0.436547	0.52445	0.530536	0.668772	0.546186	0.617169	0.844199	0.536688	0.977376	1.02439	0.0874489	0.397529	0.465663	0.588208	0.755287	0.416035	0.310023	0.315625	0.761588
	1.29137	0.108302	0.821764	0.897705	0.880597	0.538097	1.56543	1.15017	0.910256	0.933206	0.677295	0.709859	0.920783	1.39305	0.546772	0.624901	1.23779	1.10901	1.15094	1.17529	1.37796	0.875502		1.23232	1.39706	0.281212	1.07064	1.06605	1.56133	0.905965	1.3319	1.00604	0.994067	1.00871	0.882056	1.11005	0.992941	1.08262	1.12805	0.764179	1.17631	1.16433	0.756179	0.882901	0.763533	0.99714	1.01012	0.942008	1.01969
	0.948666	0.161275	0.822281	0.788105	0.910781	1.12126	0.866029	0.863536	0.866029	0.994092	0.71	0.814035	0.713041	0.952	1.34569	0.64506	0.573585	0.845506	0.960018	0.994517	1.11919	0.967108	1.05128	0.941982	0.804089	0.610896	0.942896	0.816912	0.75544	0.933078	0.96434	0.918193	0.795891	0.616309	0.914674	0.890869	1.11916	0.817829	0.96558	0.873995	0.975452	0.762917	0.596649	1.04005	1.52392	0.416667	0.836645	0.862385	0.800232
	1.34757	0.20877	0.848946	0.80935	1.17557	1.3823	1.39326	1.42363	0.860681	0.952773	1.10088	0.882464	1.70477	1.53623	1.1953	0.549537	1.28369	1.16964	1.09829	0.950625	1.06379	0.764456	1.05333	1.2875	1.29811		1.48789	1.16119	1.28527	0.99174	1.21488	1.0853	0.914367	1.10818	1.0875	0.779944	0.986395	0.955224	0.990602	1.14079	1.51678	1.12242	1.09277	1.18323	1.14717	1.08497	1.31173	1.57003	1.27345
	0.990891	0.148486	0.380073	1.26192	1.01376	0.643038	1.151	1.24074	0.834499	0.80704	1.09382	0.828729	0.871762	1.28831	0.621644	0.420702	1.23404	0.386374	1.06775	0.643233	0.917256	0.878387	0.657825	0.929092	1.16531	0.309763	0.836221	0.498119	1.35942	0.70405	1.30484	0.755039	0.687267	0.872489	1.06195	1.09446	0.980716	1.08885	1.00646	1.02821	1.27279	1.13808	0.953588	0.776022	0.285121	0.774194	0.60708	0.67483	0.808603
	1.75393	0.0726543	0.444944	1.53101	1.05614	1.06447		1.2218	0.911877	0.841219	0.44898	0.383004	1.62056		0.77141	0.403026	1.44865	1.10891	1.08577	0.827349	1.19237	0.722612		1.08749	1.49231	0.197977	1.23142	1.32501		1.03981	1.12261	1.07294	0.915609		1.05196	1.19095	0.96624	1.22727	1.03962	1.46372	1.0678	1.27624	1.12699	1.00101	0.739677	1.26944	1.35506	1.58844	0.848386
	0.980185	1.90954	0.777716	1.02062	1.0314	1.06072	1.24242	1.22637	0.970387	0.971736	0.922593	0.664948	1.52056	1.27815	1.32462	0.65323	1.49348	1.36229	1.16236	0.929487	1.20848	0.754244	0.975248	1.19791	1.29594	0.351093	1.28887	1.43094	1.41308	0.967337	1.18692	1.13605	0.886436	1.1635	1.04721	0.969121	0.979118	1.2574	0.942016	1.11172	1.70794	1.06046	1.014	1.13767	0.495054	0.896065	0.918919	0.637427	1.08494
	1.48326	0.155103	0.905908	0.987371	1.03949	1.48296	1.22563	1.3849	0.781277	0.992798	1.34584	0.892857	1.34709	1.3228	1.20451	0.60898	0.939227	1.08638	1.15497	0.98599	1.0539	0.776212	0.92011	1.33893	1.40201	0.393084	1.59246	1.11384	1.31285	0.945946	1.30417	1.03412	0.954125	0.953975	1.273	1.02804	0.973468	0.974603	0.987971	1.15457	1.56443	1.12461	0.949773	1.1725	0.688016	1.41274	1.65208	1.79464	1.20009
	1.26839	0.17054	1.05165	0.839383	0.96767	0.639409	1.0137	0.722437	0.922495	0.909246	1.21429	0.685714	1.25851	1.2039	0.650326	0.733934	1.12632	0.893529	0.759443	0.947653	1.22739	0.831712	0.754717	1.16584	1.14674	0.783922	0.962017	0.819684	1.44898	0.768664	1.27539	0.906997	0.89697	1.05607	1.09977	0.985075	0.97786	1.09061	1.02681	0.917431	1.1215	0.873543	1.03133	0.863137	0.444685	0.930018	1.18841	1.62193	0.797937
	1.12597	0.136334	0.656868	0.933808	0.932897	0.697599	1.26066	1.10061	0.971631	0.931016	1.07399	0.909722	0.654961	0.79403	0.649679	0.699263	1.03191	0.653989	0.87323	0.915736	1.12309	1.07873	0.820885	0.865254	1.33333	0.567072	0.791716	0.585655	0.74	0.774548	1.24566	0.795548	0.7484	1.07979	0.901539	0.833819	0.951327	0.541176	0.43762	0.485375	1.31951	1.09511	0.877442	0.783962	0.829379	0.894737	0.868778	0.739353	0.835304
	1.32216	0.249603	0.538996	0.757376	1.15728	0.904404	1.0452	1.14013	0.953771	0.845466	0.651941	0.864706	1.25618	0.70322	1.07209	0.532857	0.887781	0.769307	1.25893	0.8717	1.51298	0.83668	1.11917	0.991364	0.806283	0.433392	1.01013	0.841694	1.08777	0.901469	0.964088	0.905497	0.638874	1.02878	1.0305	1.2562	1.31616	1.08873	1.07963	0.733333	1.32543	0.97229	0.65839	0.984276	1.72294	0.964409	0.759954	0.604811	0.944387
	0.125509	2.30542	1.93111	0.314636	0.596491	0.593311	0.399349	0.287526	1.0364	0.581663	1.19377	1.45308	0.410765	0.391031	0.2949	2.89839	0.520661	0.5845	0.348523	0.558858	0.213365	1.30376	0.61658	0.294961	0.117647	4.3544	0.313139	0.381898	0.76455	0.546768	0.340704	0.537034	0.564689	0.457258	0.572769	0.503632	1.30184	0.514541	1.08475	0.767908	0.0384464	0.36906	0.440988	0.566249	1.26185	0.577646	0.520286	0.304279	0.699486
	1.5358	0.291667	0.990486	1.24246	1.341	0.900579	1.17375	1.58035	1.14116	1.08212	0.721311	0.778295	2.16379	1.07576	0.726418	0.868301	1.32222	1.23844	1.17407	1.09008	1.69385	0.876687	1.06299	1.45347	1.49723	0.277	1.55211	1.65664	1.40553	1.2089	1.4001	1.46534	1.18896	1.04808	1.52425	1.4531	0.895706	1.30769	1.02862	0.852679	1.70167	1.47715	1.06802	1.25984	0.521875	1.3314	1.34507	1.29248	1.08029
	1.56521	0.612035	0.782162	1.08418	1.13557	0.871781	1.22476	0.998098	1.05353	0.831237	0.691057	0.718499	1.54108	0.96861	1.15484	0.569511	1.17355	0.955701	1.03868	0.799809	1.37741	0.682637	0.725389	1.1432	1.15441	0.225188	1.19002	1.11069	1.17196	0.894471	1.05139	1.01125	0.836244	0.601613	1.02819	1.03148	1.0576	1.08725	1.0678	0.916905	0.977246	1.22546	0.810936	1.05586	1.13092	1.16518	1.42243	1.47702	0.98028
	0.939368	0.105062	0.783507	0.501576	0.841871	1.03009	0.566787	0.301455	0.814159	0.942148	1.19853	1.42072	0.838728	0.76284	1.30318	0.551302	0.57041	0.647045	0.689246	0.860176	1.11544	0.75408	0.688172	0.889217	0.5	0.862552	0.860382	0.868933	0.825564	0.926694	0.529329	0.891861	0.755129	0.699301	0.931867	0.920455	1.21319	0.619855	0.956618	1.30383	0.689928	0.443924	0.727426	0.948124	0.331217	0.628176	0.763505	0.932755	0.452711
		3.91635		0.325105	0.979592		0.499016	0.363911	1.04785		0.533942	0.445916	0.197163	0.328934			0.408998		0.461689			1.17769	0.860759		1.35766	3.63911			0.628488		0.390689			0.661277		1.31017	1.02938	1.10132	0.966935	0.806557	0.0935895	0.485212	0.395317		0.292421	1.22573	1.2315	1.32998	0.6587
	0.865604	2.19591	0.82117	0.79679	0.813223	0.530682	0.648485	0.753461	0.76082	0.775251	0.611705	0.716495	0.448499	0.865894	0.779537	0.803657	1.02048	0.851947	0.797327	0.77159	1.00658	1.24149	1.0198	0.769083	0.638298	1.15808	0.496037	1.47422	0.661682	0.747503	0.806935	0.784673	0.896726	0.874525	0.655056	0.940618	1.07889	0.870159	0.963426	0.538965	0.806925	0.812758	0.981201	0.679526	2.17646	1.26942	1.30595	1.34211	1.02951
	1.61411	0.196914	0.879459	0.908367	0.955326	1.12904	1.20635	1.08165	1.10041	1.25964	1.63077	0.995569	1.28727	1.03329	1.38422	0.884837	1.57955	1.10019	1.24945	1.32271	1.7813	0.70652	0.778082	1.48158	0.869191	0.779109	1.6975		1.48041	1.28647	1.06308	1.23218	0.983	1.10809	1.40857	1.34953	0.800407	1.13226	0.982517	0.69378	1.41959	0.986542	1.13145	1.35907	1.48852	1.25797	1.38462	1.38037	0.914833
	1.1666	1.01283	0.886759	1.32138	1.32589	1.04226	1.35135	1.99582	0.926108	1.03778	1.7702	1.41129	1.59652	0.860759	1.23562	0.743698	1.22793	1.30899	1.07228	1.02538	1.34997	1.10904	1.25126	1.23185	0.704641	0.272156	1.29466	0.853111	0.846543	0.952406	1.46204	1.08466	1.01017	1.16318	1.25851	1.11979	0.903448	0.742574	0.809612	0.546043	1.04074	1.43284	1.27241	1.10473	1.63265	0.614256	1.15015	0.167541	1.20184
	1.22238	0.13425	0.655047	1.32207	1.15464	1.10835	1.56846	1.66304	0.956522	1.03787	0.895662	0.803395	1.32199	1.50072	1.15181	0.551217	0.891041	1.03711	1.28655	0.980757	1.20682	0.83797	1.20909	1.12214	0.9	0.292726	1.29146		1.42921	0.797239	1.20812	0.82589	0.730002	1.71429	0.975336	1.27164	0.978044	0.708397	1.00917	1.41071	1.82515	1.17889	1.32276	1.08249	1.37056	1.2	1.32248	1.66571	1.1819
	1.31661	0.402403	0.92002	0.879765	0.677966	1.01779	0.743723	0.639475	0.776074	0.726732	0.454039	0.645646	0.93775	1.01167			0.559633	0.785266	1.03153	1.30731	0.833971	0.672911	0.792453	0.738191	0.727064	0.788348	0.887755		0.630273	1.20163	0.868839	0.849163	0.973302	1.85874	0.97645	1.29234	1.10427	0.789623	0.990187	1.54589	1.10958	0.66659	0.93142	0.881665	0.728	2.15522	2.48227	2.01536	0.863981
	0.727167	0.510536	0.51771	1.53868	0.687117	0.839401	1.33566	1.49243	0.7806	0.637097	0.897436	0.777293	1.50216	1.23684	0.568027	0.406099	1.18412	0.639955	0.72642	0.606334	0.469291	0.801891	0.864407	0.587857	0.749568	0.376964	0.83395	0.634735	1.04368	0.732775	1.2614	0.599969	0.739981	1.95833	0.728377	0.952809	1.10924	0.793169	0.989862	1.51282	1.2939	1.37903	1.42194	0.682817	1.01276	0.965193	1.05978	1.05382	1.04741
	0.983452	0.713217	0.959355	0.808634	1.16357	1.03085	0.770335	0.959102	0.942584	1.06289	1.49091	1.42807	1.11804	0.882	1.28604	0.82515	1.09811	1.19416	1.05649	1.12953	1.31935	0.903651	0.775641	1.16452	1.15503	0.511831	1.24484	0.779572	0.950392	0.931813	0.960775	0.985865	0.832831	1.11588	1.14853	0.904232	1.11215	1.06589	0.972826	0.77748	0.772621	0.96876	0.803004	1.03834	0.548091	0.547619	0.492274	0.547401	0.831969
	0.890681	0.452571	0.81364	1.11871	0.897436	0.835243	1.6085	0.764604	1.05085	0.99267	0.764706	0.674615	0.692687	0.836013	0.916973	1.2767	0.786127	0.813904	0.647648	0.890667	0.854993	1.14758	0.852473	0.799565	0.953947	0.696009	0.455325	0.905711	1.01031	0.684469	1.13325	0.650751	0.621947	0.662058	0.74982	0.963504	1.13889	0.508257	0.82765	1.18654	0.875242	0.861979	0.989671	0.836806	1.33648	1.08306	1.10686	1.0208	0.740163
	0.630187	3.92316	0.956734	0.586833	0.771574	0.52437		0.467365	0.876254	0.882115	0.735818	1.32335	0.343537		0.365753	1.09964	0.497608	0.903461	0.43275	0.77695	0.832637	1.4362		0.551091	0.495429	2.17839	0.377754	0.670228		0.881881	0.437129	0.604516	0.506801		0.583931	0.974478	1.22727	0.621849	1.05104	0.890244	0.232932	0.358971	0.794284	0.56471	4.19315	1.12595	1.23888	0.707214	0.825881
	0.209398	1.9915	1.2206	0.35745	0.58427	0.583266	0.525208	0.372384	1.07558	0.547681	1.58086	1.43556	0.346808	0.420846	0.468138	2.25563	0.586301	0.910217	0.761458	0.507202	0.217437	0.855019	0.851541	0.283817	0.417671	3.65452	0.305512	0.294495	0.754319	0.537523	0.425506	0.464257	0.443347	0.858824	0.501438	0.877934	0.990719	0.536036	0.86	1.18182	0.0786149	0.446037	0.326283	0.566223	0.781475	0.0935484	0.139379	0.226987	0.725029
	0.758713	0.108278	0.300964	1.13768	0.75	0.493579	0.723327	0.648673	0.951389	0.526705	0.703297	0.464029	0.671924	0.732877	0.586966	0.396142	0.600985	0.524375	0.850185	0.491211	0.510287	1.11028	0.674225	0.518804	0.661597	0.755915	0.483892	0.487162	0.959732	0.498123	0.871272	0.490827	0.342871	0.62017	0.611213	1.18717	1.07295	0.790541	1.01774	1.03333	0.557777	0.709302	0.655179	0.550027	1.16634	0.952573	1.03926	0.971698	0.655433
	0.630504	0.20651	0.583536	0.82547	0.775641	0.64547	0.842296	0.791314	0.843137	0.645035	2.17365	1.84387	0.785244	1.18506	0.481806	0.532874	0.969543	0.671609	0.922283	0.644394	0.629755	0.950772	0.717349	0.62916	1.55556	0.499799	0.705494	0.372762	1.67528	0.44426	0.888023	0.537384	0.376155	0.526429	0.63209	0.797927	1.031	0.687285	1.01869	0.703833	1.19111	0.882335	0.712285	0.544811	0.619547	0.150754	0.157632	0.137658	0.86713
	0.759397	1.53555	0.941167	0.686056	0.621212	0.720372	0.886443	0.401819	0.91134	0.896537	0.78202	1.06954	0.446611	0.827684		0.802432	0.781759	0.670784	0.792844	0.805369	0.517734	1.29796	1.32407	0.730179	0.892632	0.674499	0.540455	0.800145	1.30841	0.742805	0.839874	0.663685	0.695826	1.03664	0.676892	1.01538	1.17126	0.630841	1.00829	0.792176	1.22701	0.699855	0.70571	0.750496	0.541038	1.17146	1.22479	1.27922	1.17706
	0.904709	0.373524	0.543298	0.669425	0.613636	0.401206	0.875536	0.640764	0.872483	0.740103	1.08788	1.10924	0.75907	1.03091	0.438634	0.519672	0.894545	0.820552	0.935556	0.705632	0.709909	0.965647	0.746753	0.710025	0.94	0.563972	0.77193	0.58946	0.920152	0.581761	0.921582	0.608286	0.597336	0.802989	0.644655	1.18101	1.01632	0.797546	1.02124	0.753165	0.940741	0.778341	0.676396	0.587086	22.123	0.702532	0.705618	0.555932	0.751731
		0.104669		0.783566	0.730233		1.11297	0.845779	1.00787		0.483633	0.805755	0.633697	1.10582			0.77451		0.817718			1.08346	0.708232		1.40748	0.466695			1.0793		1.0877			0.631629		1.11225	0.965079	0.821705	1.00816	0.934866	1.03942	0.829079	0.716547		0.562451	0.935282	0.976864	0.846154	0.70786
	1.6619	0.169524	0.782214	1.43242	0.894268	1.41338	1.35933	1.29219	0.965106	1.0664	1.11528	0.992857	1.49875	1.2995	1.60443	0.608526	0.972376	1.23351	0.932861	1.03077	1.56338	0.615473	0.804408	1.24135	1.23618	0.319046	1.49632	1.08358	1.37709	1.1249	1.30542	1.1702	1.03387	1.35565	1.28594	1.09034	0.929552	1.04127	0.981556	1.00946	2.04056	1.24412	1.177	1.27475	0.72392	0.877358	1.07083	0.9375	0.938086
	1.03292	0.181357	0.727017	1.14824	0.92511	1.51014	1.6391	1.44412	0.828221	0.845641	1.03471	0.98008	1.18822	1.21667	1.62603	0.503701	0.972973	0.997989	0.99595	0.850633	1.18859	0.924721	0.828685	0.737527	1.15504	0.261777	1.00522	1.03689	1.07475	0.916937	1.27223	0.84326	0.843965	1.33758	0.942148	1.00565	1.07907	1.02389	0.90613	1.86014	1.38647	1.12352	1.09693	1.07672	1.2009	1.02887	1.10503	1.22654	1.26784
	0.569669		0.661524		0.628856	0.565727			1.13327	0.71164	1.44022	1.46711			0.63217	1.0487		0.52367		0.721834	0.523416		1.52667	0.637698	0.33545		0.392519	0.574883	0.679406	0.886565		0.697466	1.05372	0.782658	0.63747	0.927954	1.07303	0.874028	0.987854	0.627566				0.624769		0.751332	1.49805	1.27208
	1.19461	1.8333	0.904238	1.03636	0.841163	0.861539	1.00297	1.7312	0.769231	0.963053	1.71225	1.17445	1.24909	1.13471	0.892852	0.96311	1.50365	1.30174	0.864027	0.975701	1.0302	0.633546	0.91922	1.23975	1.35282	0.146798	1.33834	1.03313	1.52206	0.910377	0.930901	1.02001	0.747582	1.30247	1.10118	0.867416	1.01278	1.2115	1.0604	0.837209	1.09171	1.27202	1.11435	1.01665	0.779059	0.882488	0.974416	1.02988	1.03567
	0.836748	0.294707	0.727728	0.883138	0.947551	0.565497	1.02603	0.841406	0.844784	0.741642	0.589722	0.550987	0.692052	1.25308	0.457522	0.631213	1.08599	0.614635	1.04214	0.733878	0.757296	1.3358	0.712691	0.687449	1.1445	1.05494	0.471611		1.44045	0.687622	1.21079	0.675503	0.525829	1.15341	0.715658	0.968824	1.09105	0.714508	1.01809	0.833906	1.15786	0.910587	1.07583	0.644739	1.65912	1.18699	1.21394	1.22594	0.888905
	0.940547	0.165928	0.701336	0.853087	0.713816	0.56272	1.13488	0.773625	0.974576	0.772563	0.926291	1.16031	0.659085	0.846371	0.617642	0.770384	0.735786	0.602828	0.92322	0.76133	0.912267	1.11366	0.577707	0.605814	0.856187	1.28076	0.493736	0.688495	1.01887	0.678854	0.925417	0.62823	0.55541	2.00823	0.664973	0.966507	1.01075	0.920128	1.08497	0.877888	0.596095	0.847689	1.04487	0.624464	0.50938	0.974863	0.985075	0.885417	0.757811
	1.64954	0.16392	0.558269	1.38679	1.11212	1.11794	1.26234	1.07941	0.763359	0.958315	1.00909	0.780822	1.3197	1.21579	1.52657	0.412249	1.54545	0.901562	1.55653	0.993964	1.26173	0.999104	0.884211	1.2573	1.79091	0.40687	1.01455	1.04273	1.24232	0.884117	1.35047	1.0777	0.808115	1.28889	1.02087	1.27815	0.997506	1.15882	0.922937	1.35273	1.40783	1.2472	1.11796	1.05888	1.22252	1.0257	1.35759	1.19675	1.23129
	0.761155	1.06937	0.693292	0.87315	0.74386	0.490446	0.993117	0.758088	0.773946	0.618778	1.16219	0.886894	0.546843	1.19028	0.449538	0.696968	0.897297	0.673257	0.823988	0.589827	0.635401	1.25964	0.841564	0.564954	0.666154	0.980525	0.464952	0.569803	0.715976	0.555081	0.924363	0.545888	0.531495	1.23993	0.602906	0.849246	1.07101	0.646753	1.01321	0.883281	0.878845	0.777182	0.909566	0.507379	1.22083	1.14164	1.1573	1.07823	0.888023
	0.987056	0.191213	0.744898	0.644797	1.00568	1.35948	0.830901	0.582803	1.01342	1.00433	1.09545	0.865546	1.42202	1.21192	1.21274	0.69815	1.04	1.149	0.946764	1.05383	1.16877	0.8378	0.516883	1.13453	1.06	0.473187	1.37474	0.861894	0.912548	1.16847	0.920669	1.1116	0.980817	0.419837	1.27606	1.03264	0.958042	0.93865	1.10039	1.16456	1.15333	0.737092	1.08076	1.31871	0.740838	0.521097	0.573034	0.542373	0.640455
	1.57958	0.102941	0.87776	1.02213	0.835821	1.13194	1.50735	1.01499	1.08308	1.04889	0.539177	0.510425	1.65563	1.36795	1.32698	0.561559	1.1068	1.11349	0.94402	1.11464	1.82055	0.922037	0.514286	1.23894	1.23265	0.378483	1.45072	1.46789	1.50797	1.2958	1.24911	1.41454	1.40476	0.976449	1.14221	1.30319	0.931792	1.20423	1.03984	0.879433		1.10624	1.12186	1.17385	0.697892	1.20975	1.26304	1.4687	1.05757
	1.62273	0.169259	0.888647	1.08507	0.914186	0.939734	1.207	1.18969	1.01195	1.21825	0.73615	1.10053	0.950651	1.31397	0.90918	0.740008	1.17949	1.35482	1.21957	1.01178	1.77966	0.878271	0.776119	1.34387	1.32245	0.63804	1.36057	1.11838	1.12159	1.03359	1.15042	1.09408	0.96459	1.07801	1.11396	1.28446	0.976526	0.673684	1.08801	0.863813	1.49789	1.27425	0.847131	1.04368	1.09222	0.932432	0.946108	0.868762	0.880041
	0.544033	0.741226	0.88334	0.577502	0.708039	0.57939	0.777982	0.569464	0.888889	0.534234	1.65842	1.32673	0.497373	0.925806	0.566697	0.713872	0.86166	0.66372	0.879876	0.512913	0.535116	1.44961	1.29478	0.424464	0.879433	1.09307	0.568772	0.384653	0.517073	0.343212	0.833572	0.456467	0.370687	0.747727	0.622609	1.08464	0.848953	0.331353	0.869485	0.856555	1.63664	0.67358	0.719615	0.505897	5.58818	0.39916	0.386266	0.304173	1.02
	0.259611	2.95359	1.86642	0.36449	0.738162	0.785385	0.460606	0.330218	1.34161	0.719438	1.96522	2.51917	0.453947	0.346056	0.341165	2.73761	0.395062	0.702303	0.45797	1.13671	0.282931	1.26076	0.708861	0.457375	0.176271	3.42774	0.44294	0.494151	0.607287	0.7784	0.423022	0.677915	0.813801	0.57788	0.500981	1.12655	1.2723	0.50028	0.999057	1.10092	0.0653501	0.40095	0.554756	0.570073	0.514706	0.744786	0.56338	0.51719	0.614019
	1.26514	0.400146	0.702855	0.979971	0.94386	1.09728	0.977384	0.767123	1.08812	1.02654	1.22449	1.35248	1.08722	1.03374	1.16746	0.771033	1.12973	0.878093	0.944057	0.976082	0.864657	0.863093	1.09053	1.05851	0.992308	0.269133	0.894681	0.836595	1.35503	0.646769	0.902577	0.699023	0.658798	1.1594	0.997346	0.954774	1.0454	0.681818	0.926415	1.47003	1.02574	0.892215	0.905992	0.934421	0.804309	0.673056	0.748315	0.846939	0.957765
	1.68248		0.595318		1.14514	1.49392	1.0405		1.01906	0.973002	0.727273	0.690476		1.28451	1.07859	0.476937		0.882638		1.03609	1.16204		0.832808	1.12301	1.1401		1.27735	1.30642	1.21973	1.06695		0.987326	1.05661	0.934804	1.18038	1.03858	0.986425	0.941915	0.950447	1.84026				1.28715		1.85602	1.46707	1.95789
	0.740245	0.633365	0.884172	0.771989	0.669303	0.762071	0.861824	0.593889	0.884479	0.839273	1.24673	1.66965	0.583841	0.77871	0.757523	0.845049	0.663614	0.670452	0.866974	0.827382	0.718669	1.17255	0.838573	0.720277	0.809721	1.68413	0.688377	0.834122	1.01087	0.865836	0.75816	0.726131	1.13049	0.788539	0.823144	0.98091	1.07488	0.767843	1.00382	0.771199	0.660785	0.63344	0.828573	0.743464	0.654063	1.31414	1.084	1.02588	0.722512
	1.72375	0.124133	0.585572	1.17633	1.38947	0.737123	1.32743	1.17575	1.30268	1.13092	0.977444	0.799521	1.26344	1.37652	1.11684	0.644622	0.8	0.873461	0.958353	1.01982	1.59013	0.897597	0.9393	1.26686	1.54615	0.123511	1.24639	1.06696	0.988166	0.98303	1.21852	0.967808	1.00871	0.77349	1.214	1.01508	0.968568	1.04545	1.05094	0.81388	1.12367	1.08151	0.906267	1.00275	0.862956	1.02662	1.17528	1.23129	0.912064
	1.1301	0.435788	0.673701	0.611452	0.8125	0.532209	1.14448	0.715515	0.925581	0.761156	1.11434	0.589691	0.622667	0.88978	0.443678	0.815287	0.763848	0.712224	0.910961	0.770361	0.970537	0.827729	0.836842	0.765374	0.541738	0.641166	0.504451	1.05857	0.940299	0.867116	0.882995	0.906445	0.8922	0.600748	0.733139	1.04278	1.0553	1.02119	1.01329	0.477711	1.09264	0.758141	0.747977	0.685691	0.823037	1.28618	1.10907	0.939873	0.735779
	0.477088	0.182382	0.463549	0.663586	0.746411	0.909947	0.760274	0.708888	0.788599	0.763088	1.03604	1.48016	1.03368	0.904055	0.493933	0.533023	0.625	0.601663	0.819255	0.735695	0.378962	0.54216	1.15016	0.467347	0.600694		0.677816	0.423157	0.954128	0.722761	0.937742	0.539821	0.824738	1.9305	0.587484	0.990431	1.22312	0.683128	1.00355	1.19668	1.08378	0.63835		0.642447	1.97447	0.535332	0.478261	0.492611	0.790431
	1.01988	0.126662	0.609843	0.698795	0.828947	0.778906	0.939535	0.748145	1	0.809308	1.06907	0.739695	0.621014	0.763431	0.802002	0.613551	0.956522	0.812249	0.754633	0.852888	0.712242	1.22837	0.629644	0.893209	1.03679	0.567755	0.871416	0.679635	0.792453	0.679023	0.944327	0.781713	0.763385	0.500412	0.811955	1.00478	1.03704	0.932907	0.978525	0.930693	0.907845	0.770272	0.67613	0.746629	0.800866	1.17596	1.0884	1.16319	0.687783
	1.24892	0.15582	0.6467	1.15009	0.916216	1.54192	1.60902	1.39286	0.913043	0.93441	1.03902	0.816794	1.36257	1.39716	1.04509	0.503254	0.885057	1.02331	1.10466	0.940445	1.2364	0.848654	0.88	0.92353	1.10458	0.335602	1.18517	1.10909	1.38191	1.01746	1.39243	0.910884	0.906092	1.38042	0.958571	1.08612	1.00462	0.988095	0.925	2.02395	0.889197	1.11866	1.11765	1.12154	0.91215	1.05451	1.12743	1.18768	1.39741
	1.52111	0.26946	1.32891	1.35533	1.25329	0.763075	1.33333	1.5833	1.0038	1.01753	0.821944	0.885284	1.26822	1.39055	1.19669	1.11369	1.14504	0.981891	0.787461	1.0736	1.45805	0.895474	0.668103	1.21465	1.27347	0.726712	1.24267	1.06677	1.51032	0.965997	1.697	1.0676	1.13336	1.44511	1.21154	1.23383	0.906103	1.16498	1.14038	0.723684	1.18396	1.38039	1.43215	0.969939	0.990233	0.948718	0.99887	0.911475	1.14013
	0.828943	1.79055	0.726717	0.851614	0.947547	0.634005	1.2129	1.15498	0.802676	0.742842	1.23177	1.23952	0.508503	0.890855	0.670965	0.623467	0.870813	0.826701	0.713591	0.656377	0.875523	1.1312	1.15636	0.71496	1.24	0.248588	0.623649	0.468381	0.8512	0.582905	1.13419	0.658919	0.516041	1.01835	0.713819	1.07193	1.04545	0.87395	1.05482	0.707317	0.889558	1.01979	1.15946	0.639575	0.837577	0.522901	0.616339	0.560113	1.10332
	0.185873	3.23632	1.27373	0.372309	0.5375	0.381041	0.678722		1.125	0.525772	1.40659	1.82734	0.270242	0.270205	0.355209	1.42616	0.541872	0.425417	0.295719	0.515996	0.213106	1.25799	0.81028	0.227526	0.247148	4.0646	0.309697	0.237116	1.08054	0.389608	0.440312	0.391472	0.318011	0.441093	0.542951	1.12834	1.25926	0.433108	1.05509	0.713333		0.342241	0.887993	0.417572	0.414873	0.45005	0.376033	0.190252	0.830613
	0.691887	0.222967	0.410309	1.00212	0.891554	0.561829	0.710887	0.538407	0.900994	0.634261	0.62418	0.694387	0.691421	0.7914	0.635678	0.396229	0.802083	0.527633	0.954711	0.643107	0.562536	1.16069	0.73433	0.55194	0.921267	1.19377	0.426391	0.398227	1.29954	0.46924	0.8667	0.541958	0.4313	1.34252	0.552878	1.19301	1.08291	0.673428	1.07287	1.0933	0.629531	0.794307	0.666765	0.547007	1.00011	1.06801	1.06272	1.33008	0.669935
	0.615412	0.212442	0.62526	1.15979	0.823266	0.848672	0.694362	0.699808	0.839161	0.773181	1.13674	1.1941	0.649432	0.770206	0.714218	0.558414	0.824818	0.610546	0.852975	0.771698	0.466042	0.78491	0.729805	0.588034	0.219624	0.570346	0.555909	0.655738	1	0.638524	0.847093	0.547206	0.655679	0.839506	0.662562	0.844944	0.68525	0.858316	0.801534	1.45515	0.57359	0.854164	0.94145	0.609788	0.636888	0.43318	0.921023	0.724077	0.858996
	1.74508	0.273735	1.21996	1.19101	1.04712	1.34597	1.43114	0.965727	0.992754	1.26118	1.31484	1.17769	1.52846	1.13522	1.70398	1.16107	1.31818	1.10899	1.23162	1.23409	1.296	1.06701	0.964029	1.50143	1.21127	0.595295	1.32645	1.07288		1.02652	1.15456	0.985153	1.00952	1.90756	3.22833	1.20994	0.998805	0.795848	0.910764	1.28622	1.03619	1.12792	1.0884	1.30397	0.644909	0.840371	0.863636	0.858034	0.954857
	0.156034	2.86887	0.758398	0.267911	0.557845	0.465103	0.403745	0.330017	1.12598	0.562691	1.91841	2.12308	0.249587	0.253659	0.250102	1.61752	0.343284	0.498744	0.339441	0.601686	0.236233	1.11906	0.784615	0.259237	0.171069	3.67331	0.225285	0.259332	0.484267	0.532136	0.383473	0.457396	0.517626	0.392646	0.473173	0.850112	1.2164	0.408434	1.02507	0.899023		0.339928	0.384631	0.382136	0.621769	0.531154	0.425439	0.273913	0.467306
	0.799821	0.0987033	0.284611	1.08088	0.911932	0.412697	0.875536	0.688535	0.785235	0.540173	0.833333	0.403361	0.795039	1.01987	0.556741	0.258338	0.741818	0.447013	0.662593	0.412951	0.598715	0.992576	0.544805	0.640553	1.03333	0.377792	0.541489	0.488519	0.509506	0.527969	0.901921	0.516022	0.535524	1.2731	0.54755	1.08605	1.05828	0.730061	1.08301	0.740506	0.982222	0.881415	0.687293	0.529698	15.6064	0.947257	1.11011	1.08136	0.65183
	0.548316	0.458679	0.610147	0.615488	0.685908	0.617991	0.696429	0.607127	0.740075	0.626548	1.84232	1.5414	0.498138	0.93913	0.605348	0.520317	0.778116	0.626969	0.899181	0.598229	0.405589	0.913485	0.782396	0.545271	1.4658	0.562918	0.656195	0.290616	0.818591	0.407854	0.782705	0.438668	0.426832	0.643028	0.688496	0.83038	1.00789	0.953405	1.0233	0.731118	1.02283	0.837551	0.681739	0.469539	0.563918	0.315653	0.289638	0.281579	0.893225
	0.753535	0.15062	0.855179	0.863766	0.854962	0.507852	0.939326	0.903873	0.773994	0.892769	1.61019	1.26066	0.907341	0.985507	0.366373	0.49851	1.24113	0.649652	1.07493	0.922788	0.895847	0.803214	0.68	0.67596	1.22264		0.446153	0.64789	1.35423	0.588237	0.969066	0.652621	0.659294	0.791557	0.672484	1.15877	0.870748	0.768657	1.04135	0.537906	0.982692	0.859917	0.926012	0.50559	0.971091	0.690632	0.386592	0.534202	0.787947
	1.2117	0.212136	0.766882	0.953065	0.734463	1.00413	1.48822	1.10017	0.83871	0.87309	0.617585	0.830189	1.04288	1.61755	1.18797	0.50533	0.84507	1.06298	1.00295	0.895468	1.12668	0.555627	0.956268	0.971357	0.980892	0.184549	1.3029	0.901061	1.00577	0.883362	0.929445	0.906275	0.712331	1.02347	1.03181	1.04762	0.96822	0.878788	0.967914	1	1.03348	0.914028	0.920234	0.976429	1.48139	0.836788	0.842105	0.80456	0.953235
	0.988113	0.148	0.498017	1.99293	0.996337	0.820355	1.44664	1.80133	0.983051	0.806538	0.721664	0.613077	1.2539	1.21758		0.477068	0.947977	1.01812	0.844342	0.871111	1.61341	0.927157	1.0424	0.951154	1.02632	0.272607	1.03439	0.958782	0.657045	0.75794	1.2593	0.94705	1.01519	0.752688	0.921969	1.0365	0.953704	0.948012	1.01014	1.3945	0.895551	1.55998	1.65117	0.884031	0.417207	0.903991	1.07987	0.816	1.20985
	1.6672		0.599675		1.0192	1.3792	1.07784		1.1087	1.11686	0.51146	0.610537		1.43239	1.3469	0.456774		1.27026		1.0267	1.28916		1.23741	1.44436	1.45775		1.75458	1.41512		0.997869		1.24425	0.945353	0.731933	1.43994	1.16575	0.948626	0.934256	0.982521	0.954064				1.2778		1.2173	1.25108	1.4571
	1.44499	0.143991	0.77358	1.1236	1.08523	0.861395	1.33047	1.54331	0.90604	1.04485	1.17273	1.21849	1.02326	1.24724	0.996087	0.611256	1.36727	0.886834	1.08876	0.991096	1.06375	0.815905	0.915584	1.06421	1.48667	0.367748	0.951952	1.00456	1.71103	0.843301	1.17728	0.903467	0.737833	1.52174	1.03185	1.40653	1.09324	0.969325	0.785714	0.797468	1.81037	1.21659	0.847636	0.838781	0.619546	0.685654	0.775281	0.922034	1.09792
	1.32019	0.161877	0.741023	0.964111	0.952715	1.12543	1.04373	0.625026	0.868526	1.09547	1.04601	1.42269	1.08172	1.01413	1.63475	0.690375	0.935897	1.0176	1.01495	0.990539	1.26405	0.851933	0.626866	1.20237	1.34694	0.470694	1.24903	0.686311	1.66253	0.851757	0.879857	0.813286	0.895787	1.71631	1.22953	0.997067	1.05164	0.814035	0.930712	1.50195	1.04075	0.755584	0.814627	1.16544	1.47066	0.686937	0.91976	0.898336	0.741285
	1.52603	0.0882682	1.0917	1.35328	1.09235	1.05644	1.38153	1.4855	1.1246	1.14143	0.868815	0.929461	1.16788	1.32688	1.42194	0.906593	1.32402	1.06901	0.827637	1.21585	1.45455	0.663777	1.08046	1.34064	1.01805	0.286412	1.24708	0.974605	1.2439	1.13792	1.13651	1.04983	0.997605	0.825377	1.17992	1.06944	0.961905	1.03704	0.977692	0.647436	1.16388	1.31208	0.782055	1.18419	0.555448	0.704167	0.846827	0.863422	0.950403
	0.303561	1.47053	0.837024	0.522439	0.545166	0.35662	0.517603	0.346537	0.96063	0.489716	1.6097	2.16154	0.322219	0.490244	0.27295	0.951538	0.395522	0.527657	0.55816	0.533808	0.243819	1.26937	0.830769	0.275883	0.324528	2.28954	0.259742	0.327723	0.896	0.446001	0.410761	0.412409	0.576746	0.478004	0.50486	0.9217	1.2369	0.540964	1.00279	0.501629	0.147612	0.398411	0.632558	0.355927	0.873469	0.678243	0.649123	0.428571	0.715031
	1.8969	0.196489	0.749907	1.60195	1.26778	1.40888	1.35521	1.24016	1.03303	1.09681	0.840176	0.597471	1.63081	1.40034	1.42009	0.693814	1.94735	1.33904	1.12858	1.16505	2.37645	0.748599	0.875968	1.46264	1.15458	0.377214	1.61004	1.64682	1.23479	1.35593	1.40378	1.45654	1.1997	1.18499	1.42289	1.39037	0.971395	1.2401	1.00399	0.945397	1.84772	1.54814	0.958589	1.36506	1.89148	1.30301	1.33971	1.34665	1.06203
	0.847898	1.03915	0.674809	0.78815	0.884565	0.642782	0.84593	0.504804	0.919588	0.872491	1.58578	1.22749	0.528117	0.722222	0.761421	0.859	0.765799	0.939262	0.827757	0.845191	0.672554	1.0103		0.73766	0.557018	1.26815	0.622244	1.02544	0.737441	0.929529	0.750646	0.830996	0.969371	0.437801	0.810499	0.896552	1.07277	0.892377	1.04	0.632603	0.758096	0.717491	0.953689	0.664963	0.923446	1.18061	1.3153	1.3012	0.826036
	0.334382		1.33565		0.745143	0.902733	1.6324		0.990973	0.838612	1.51082	1.19643		1.82535	0.573632	2.44726		0.872514		0.908278	0.310724		1.35016	0.507856	0.269565		0.548341	0.683579	1.49477	1.01657		0.774755	1.08902	0.975928	0.640099	1.21068	1.12398	0.718995	0.963444	1.27796				0.70129		1.21302	1.07635	0.668421
	1.43346	0.174726	0.569559	1.1933	0.822472	1.06968	1.65651	1.24273	0.877907	0.878139	0.744017	0.537778	1.253	1.65388	0.770025	0.487851	0.778082	1.00589	1.08022	0.854809	1.03242	0.662859	1.32773	1.00796	0.871486	0.323861	1.24593	1.0673	1.19002	0.941669	1.21723	1.01121	0.84288	1.63801	1.04296	0.981221	0.918794	1.18919	0.834	1.48951	1.92139	1.04099	1.12352	1.0684	1.20054	0.75576	1.41366	1.30499	1.04739
	1.19156		1.06783		0.966154	2.16068	1.36041		1.11644	1.19355	0.89557	1.04072		1.28684	1.81978	0.584455		1.25671		1.02395	1.22851		1.2638	1.06038	1.23735		1.21238	1.65022	1.23642	1.31568		1.17852	1.38893	1.23416	1.11455	1.08889	0.981701	1.49077	0.900675	2.87137				1.4127		1.31637	1.26545	1.30256
					0.712121		0.687138		1.23299		1.39163	1.84652		0.443503									0.886111		0.345684				0.786916					0.280916		0.989011	1.2503	0.696262	1.03779	0.586797						0.915758	0.819328	0.603896
	1.22344	0.245392	0.706664	1.05414	0.894942	1.06469	1.51163	0.928061	0.870103	0.862773	1.43541	1.38389	1.22467	1.48958	0.771574	0.550231	1.27881	1.16131	1.23636	0.80819	1.24049	0.706535		1.06052	0.929825	0.357835	1.28389	0.954667	1.66825	1.02916	1.14524	1.06801	1.02463	1.25169	1.11396	1.10776	0.99061	1.23767	0.984186	0.982968	0.939647	1.15999	1.13957	1.09869	0.794356	0.382129	0.40999	0.358434	1.14922
	1.47378	0.221811	0.938701	1.06297	1.03289	1.12084	1.10222	1.05046	0.927757	0.920809	1.03176	0.714948	1.12755	1.22139	1.04848	0.631458	1.24427	0.73161	1.05511	0.874493	0.842667	1.17086	0.766379	0.9913	1.37959		0.707843	1.09649	1.57522	0.807959	1.0511	0.753771	0.719681	1.94043	0.840527	0.9801	1.02817	0.727273	0.934615	1.53289	1.8933	0.950712	0.812912	0.949674	1.1991	1.18162	1.2565	1.43934	0.974077
	1.3258	0.280677	0.559533	0.929431	1.10938	1.12892	1.30872	1.26756	0.822171	0.918282	1.06177	0.95914	1.58574	0.711111	1.40699	0.476448	1.09589	1.03585	1.19033	0.926206	1.84019	0.776288	1.00319	1.08987	0.635897	0.356167	1.26467	0.824446	1.01065	0.954381	1.11744	1.06875	0.826953	0.90368	1.30694	1.31737	0.982164	1.16878	1.00357	0.610465	0.976325	1.10766	0.948098	1.07222	0.782211	0.703093	0.71714	0.834154	0.969755
	1.40718	0.145135	0.585929	1.35852	0.864686	1.14764	1.0301	1.22875	0.868167	0.848366	0.8823	0.487834	1.62473	1.35199	0.971386	0.423448	1.11661	0.944435	1.174	0.880252	1.0512	0.91094	0.908517	1.0784	1.20172	0.279745	1.23641	1.0555	1.40113	0.913964	1.29223	1.04639	0.802745	1.27586	0.949252	1.27019	0.96449	1.1751	0.933576	1.44	1.37642	1.13732	1.07897	1.0649	1.3	1.16327	1.19311	1.22605	1.11304
	0.106043		1.29253		0.78806	1.0223			2.25536	0.855956	1.27717	1.42105			0.456762	2.03099		0.827401		0.826523	0.449036		0.86	0.494509	0.281481		0.409293	0.585406	0.755839	0.853054		0.791122	1.16428	1.62008	0.5889	1.21037	1.1236	0.66874	0.97004	1.33138				0.655025		1.373	1.26654	1
	1.38329	0.118467	0.523954	1.08204	0.884808	1.09491	0.905263	0.867612	0.810811	0.844412	0.690042	0.553846	1.23594	1.10947	1.12843	0.386137	0.648649	0.749071	1.29067	0.810837	0.863268	0.801062	0.884956	0.909187	0.872131	0.489466	1.01382	0.952459	1.10648	0.955421	1.01898	0.861037	0.820557	1.5097	0.934768	1.1013	1.03797	0.767213	0.959009	1.37374	0.72869	0.912266	0.641524	0.926812	0.49217	1.2221	1.27373	1.63361	1.03783
	2.27123	0.313113	0.902923	1.51546	0.997015	1.28449	1.69853	1.897	0.855385	1.08249	0.818061	0.46332	1.93157	1.97329	1.12885	0.691204	1.02913	1.39403	1.33307	1.16883	1.81789	0.740333	0.801843	1.59213	1.33878	0.124865	1.70663	2.19389	1.54897	1.53192	1.87695	1.64276	1.66622	1.73913	1.69888	1.41489	0.959538	1.27465	1.03013	0.900709	1.97765	1.32408	1.17593	1.3712	1.02108	1.19915	1.31293	1.59052	1.00032
	1.17273	0.523966	0.487256	1.20419	0.843079	0.852074	1.5107	1.14539	0.866397	0.793735	1.13201	1.15827	1.04358	1.57379	0.813036	0.474063	1.47158	1.08059	1.29852	0.846818	1.16747	0.570401	1.11289	1.04134	1.24717	0.243748	1.39021	0.828699	1.12476	0.75662	1.29135	0.871296	0.699305	0.986867	1.13646	1.12683	0.971721	0.954064	1.06132	0.86148	1.12384	1.33884	1.31134	0.891631	9.50474	0.726407	0.661812	0.556785	1.1883
	1.03953	0.181726	0.384654	0.8258	0.857143	0.785375	1.09225	1.01816	0.889976	0.796265	0.832181	0.924444	1.24788	0.708887	0.968808	0.445213	0.897796	0.787293	0.988998	0.797545	1.38846	0.66974	1.08696	0.846574	0.651769	0.20798	1.09537	0.671439	0.733796	0.782578	0.901227	0.80612	0.785161	0.836912	0.991959	0.871921	0.92865	1.07143	0.920257	0.70028	1.10693	1.0073	0.870014	0.851363	0.497887	0.40321	0.687361	0.744257	0.973076
	1.11957	1.01715	0.891566	1.16111	1.23043	1.07811	0.949555	1.17053	0.965035	1.12357	0.897741	1.14988	1.57768	0.866878	1.43475	0.733838	1.76642	1.1793	1.08856	1.18168	1.5527	0.85502	0.768802	1.27912	0.947808	0.426712	1.24661	0.867902	1.04044	1.00387	1.14697	1.19985	0.960946	0.641975	1.30756	0.853933	0.917538	1.01437	0.972196	1.04983	1.61866	1.28927	1.29233	1.17767	0.355427	0.483871	0.491657	0.544815	1.08979
	0.229239	2.93012	1.60202	0.358428	0.666667	0.595059	0.624609	0.316106	1.14625	0.762423	1.36013	2.02749	0.286957	0.307692	0.316311	2.03532	0.7125	0.641475	0.302935	0.74808	0.256716	1.49566	1.07287	0.330558	0.316	4.7261	0.322192	0.43904		0.75524	0.357292	0.598974	0.980934	0.546774	0.651912	1.165	1.26005	0.441892	1.10597	0.75		0.397587	0.422367	0.468017	3.70416	0.975454	0.884916	0.583051	0.795946
	1.37337	0.108302	0.52646	0.910338	1.13134	0.874201	1.08148	1.11761	0.903846	0.934621	0.429952	0.492958	1.34762	0.981718	0.779033	0.387446	1.16612	1.2092	1.0018	0.981892	1.5033	0.656303		1.12707	1.37745	0.199086	1.36073	1.33584	0.398268	1.09105	1.00248	1.17919	1.01735	0.824193	1.0894	1.0622	0.952941	1.20798	1.02248	1.2	1.45948	0.952265	0.748497	1.06946	0.792023	1.06959	1.10526	1.1768	0.860963
	2.08651	0.134411	0.535562	1.36025	0.914851	1.0826	1.65746	1.58906	0.714286	0.72742	0.47138	0.297391	1.25896	1.25047	0.678138	0.462294	0.637306	0.953701	1.16929	0.74301	1.15103	0.617469	1.00912	1.13071	0.961039	0.213684	1.19812	1.46895	1.09008	1.08281	1.16953	1.09118	0.777132	1.47297	1.1489	0.661654	1.02535	1.2	1.04015	0.923077	1.2386	1.24366	0.942748	1.12345	1.63067	1.0051	1.41379	1.5654	1.1976
	0.666186	0.608456	0.881707	0.926396	0.704478	0.51246	0.955882	0.824468	0.750769	0.769208	0.981408	1.32819	0.709713	0.872404	0.497915	0.770575	0.572816	0.601697	0.699197	0.71062	0.746539	0.961019	0.765899	0.564411	1.22449	0.498744	0.472995	0.566305	0.865604	0.623334	1.07762	0.567376	0.524982	1.45833	0.755105	1.1383	1.05434	0.78169	1.09232	0.787234	0.719145	0.913053	1.1588	0.577997	1.40281	0.92161	1.02268	0.846024	0.908797
	0.817349	0.208233	0.942952	0.975678	0.905512	0.963766	0.563846	0.596991	0.882353	0.936052	1.01092	0.639821	0.525382	1.10024	1.68737	0.771448	0.816327	1.48708	0.755824	0.951298	0.988181	1.03033	0.621918	0.901156	0.65896	0.685548	0.938733	0.918048	0.692308	0.898219	0.788649	0.888216	0.920921	0.729825	0.871369	0.988399	1.09392	0.872117	1.00633	0.98645	1.01982	0.602389	0.619003	0.965074	1.00839	1.19177	1.14685	1.10312	0.658987
	0.735477	0.986193	0.743714	0.871029	0.901515	0.936955	0.791425	0.709161	0.849485	1.05782	1.7734	1.90408	1.16829	0.80791	0.947326	0.702547	0.899023	1.35307	1.32852	0.920465	1.02398	0.814198	0.799074	1.03925	0.884211	0.443374	1.28171	0.622526	1.28972	0.813001	0.847013	0.889797	0.889406	1.36183	1.07696	0.918681	0.936527	1.15421	0.969585	1.022	0.730221	0.951898	0.874555	0.934767	1.27123	0.336967	0.317227	0.308117	0.916274
		0.132984		0.569444	0.836641		0.988764	0.850796	0.866873		1.0715	0.911848	1.07341	0.944928			1.23404		1.02431			0.549236	0.78		0.928302				1.31348		0.990432			1.21372		0.385515	0.904762	0.602239	1.06579	0.561011	1.23349	0.847769	0.99711		0.793693	1.05447	1.11508	1.00326	0.752962
	0.997531		0.994338		0.830357	0.650648	1.02857		0.950725	0.929944	1.39483	1.31839		1.02275	0.692511	0.80356		0.785099		0.909634	0.947883		0.888889	0.777849	0.710943		0.77013	0.635979	1.2278	0.656831		0.687832	0.608226	0.901126	0.792236	0.778711	1.20737	0.50728	1.08708	0.61476				0.705238		0.549107	0.607961	0.521008
	1.16822	0.17523	0.436096	1.42053	0.951456	0.730462	1.40678	1.5758	1.0073	0.737479	0.884873	0.555294	0.782059	1.4691	0.711829	0.583815	0.852868	0.726975	0.89836	0.664209	0.87328	1.17364	0.678756	0.945834	1.51832	0.281698	0.91995	0.829705	1.09091	0.737443	1.21345	0.78427	0.753783	0.668345	0.874416	1.14601	0.981265	0.940048	1.08519	1.13939	0.822739	1.14858	0.920742	0.967317	1.0367	1.26292	1.08987	1.30584	0.83204
	0.30422	0.412041	0.820782	0.267992	0.926625	1.33137	0.514768	0.420682	1.125	0.927678	1.87687	1.83229	1.31575	0.590343	1.27017	0.665884	0.37766	0.619459	0.84735	0.946909	0.524371	1.26245	0.637975	0.770485	0.812977	1.99724	0.755039	1.59478	0.632636	1.75266	0.511966	1.55041	2.2999	1.03965	0.762106	0.773626	1.16136	1.09362	0.950673	1.77617	0.0920502	0.420343	0.65705	1.16129	0.810894	1.07659	1.20539	1.60274	0.859473
	1.16192	0.158653	0.560797	1.27005	0.587973	0.990983	1.13718	1.76691	0.696165	0.745328	1.85049	1.64482	1.27246	1.44562	0.887261	0.500089	1.04813	1.00432	0.917328	0.709758	1.00923	0.855091	0.849462	0.973358	0.282197	0.286914	1.10695	0.94266	0.897744	0.829176	1.42914	0.786934	0.794937	0.672028	1.05688	0.6875	1.0044	0.615012	1.08788	0.766962	1.78012	1.09206	1.23181	1.10887	0.790781	0.621247	1.08523	0.898048	0.99954
		0.597903		1.07064	1.07769		1.5	1.85404	1.04784		0.555066	0.410309	1.46529	0.966887			1.14339		1.04932			0.774153	1.33168		1.1528	0.335647			0.624299		1.05216			0.508745		1.11164	0.944316	1.13895	0.715433	0.66485	1.72994	1.26008	0.746998		0.587927	1.2553	1.3427	1.02924	1.18374
		0.105957		0.956344	0.80102		0.708197	0.658142	0.899522		1.3919	1.06402	0.959137	1.07208			1.05521		0.988391			0.696979	0.835443		0.850365	0.463971			0.945668		0.937876			0.63234		1.0273	1.05767	0.920705	1.01519	1.04918	0.639148	0.802906	1.19399		0.464075	1.28442	1.27446	1.07538	0.712437
	0.818001	1.1827	0.845393	0.693949	0.749601	0.712382	0.684039	0.510065	1.09636	0.735349	0.888889	0.734584	0.456657	0.667265	0.708426	0.714399	0.640496	0.724142	0.533843	0.761865	0.761443	1.22479	0.823834	0.753898	0.863971	1.45005	0.530218	1.40385	0.621693	0.897031	0.566063	0.83575	0.989302	0.235484	0.688054	0.726392	1.13825	0.787472	1.0339	0.727794	0.548058	0.540785	0.80805	0.697614	6.00482	1.26805	1.52029	1.53724	0.883681
	1.03937	0.207252	0.454925	0.867549	1.02725	0.999583	1.1308	0.596227	0.732955	0.713727	1.1847	1.15304	0.96146	1.33022	0.84369	0.369413	0.781915	0.810987	1.11407	0.716864	0.811381	0.706185	0.916456	0.854273	0.916031	0.447034	0.988847	0.809372	1.02594	0.800088	0.962535	0.816596	0.729704	1.60352	0.714738	0.698901	1.07045	1.0383	0.972197	1.45848	0.70096	0.858823	1.11271	0.847606	0.32374	0.882416	0.897868	0.873288	0.850807
	0.842389	0.185464	0.613038	1.25751	0.915179	1.05003	0.871622	1.06506	0.975369	0.759149	1.13131	0.765323	0.851976	1.06329	0.913175	0.371315	0.919918	0.704179	0.863034	0.772864	0.643202	0.832043	0.633166	0.653138	0.43038	0.475088	0.816774	0.668074	1.00843	0.742321	1.09579	0.687945	0.761191	1.09623	0.849325	0.619792	1.18621	0.920792	0.981516	0.848921	0.929819	0.944937	0.98543	0.768571	0.704568	0.285115	0.708709	0.629508	0.991745
	0.314721	0.454709	1.06656	0.299469	1.02913	1.41909	0.779661	0.517197	1.16788	1.0302	1.834	1.61176	1.41288	0.798956	1.20063	0.896562	0.683292	0.702389	0.89236	1.04395	0.331219	1.27897	1.19689	0.720803	0.832461	2.11536	0.658437	1.19869	1.05956	1.53196	0.58706	1.22054	1.94519	1.59712	0.926076	0.831956	1.32553	1.22782	1.05741	1.30909	0.0819158	0.505507	0.597943	1.05512	1.38349	1.35247	1.11718	1.19931	1.00472
	1.01305	0.494062	0.519985	0.796938	0.979266	0.797181	1.11401	0.828023	0.895075	0.791405	1.14228	1.53351	1.09518	0.878924	0.72986	0.49395	1.00413	0.807034	1.12935	0.824973	1.28587	0.638127	1.23834	0.85919	0.871324	0.302689	1.05333	0.613371	0.880952	0.782132	0.98052	0.758514	0.667093	0.558871	0.851742	1.12833	1.02074	1.05593	1.0678	0.659026	1.19419	0.989264	1.06222	0.840684	0.925301	0.589515	0.701671	0.561014	1.00357
	2.2875	0.766567	0.834283	0.926938	1.36824	1.45511	1.69461	1.36481	1.05797	1.23325	0.455971	0.278926	1.70433	1.40881	1.2662	0.764429	1.37879	1.55214	1.02173	1.22337	2.25773	0.725478	1.34532	1.76622	1.33099	0.293349	1.82733	2.52762		2.09591	1.36657	1.96376	1.58684	1.02521	1.59604	1.0884	0.946237	1.53633	1.0138	0.876325	2.23333	1.14492	1.20939	1.98133	1.35509	1.15139	1.27056	1.50702	1.04958
	1.3066	0.248853	1.18477	0.914879	0.782762	1.00294	1.23024	0.962972	1.02095	1.03083	1.17149	0.782921	0.827144	1.44367	1.02714	0.796349	0.845221	1.25188	1.14988	1.10988	1.36179	1.15454	1.09793	1.20568	1.11432	0.943451	1.06104		1.32431	0.930632	1.26265	1.02093	0.936986	1.03402	1.1003	0.852489	1.03074	0.696024	0.944812	0.787647	1.97329	0.935728	0.949766	0.976894	0.820072	1.41701	1.40566	1.40122	0.806161
	1.86305	1.71394	1.03079	1.7267	0.949951	1.10028	1.8062	2.36055	0.985781	0.954299	0.605555	0.474619	1.73142	1.46029	0.921077	0.731886	1.85227	1.41327	1.37222	1.51713	1.91997	0.895298	1.31019	1.5532	1.14475	0.301548	1.70965	2.95085	1.19457	1.35482	1.73613	1.62821	1.33333	1.10666	1.08005	1.26923	0.921779	1.21685	0.980992	0.935256	1.82818	1.65412	1.37265	1.36494	1.07541	1.83979	2.00198	1.81248	1.69659
	0.676997	0.170376	0.787402	0.997468	0.928899	0.88466	0.883191	0.490516	1.21678	0.865369	0.924485	1.02762	0.632344	1.01299	1.23637	0.770409	0.865248	0.661535	0.663857	0.783145	0.562915	1.46346	0.843501	0.730602	0.937669	1.0841	0.704353	0.451769	1.18841	0.695734	0.756575	0.610133	0.713518	1.29258	1.00707	1.29642	1.10193	0.901454	0.959612	1.5047	1.40483	0.701048	1.26241	0.804168	0.516209	0.639469	0.99823	0.829932	0.611165
	1.19157	0.305791	0.676744	0.970838	1.04911	0.951998	0.898649	0.687215	0.916256	0.949475	1.39394	1.28226	0.531815	1.17637	1.31592	0.553888	0.731006	1.07607	0.770611	0.939514	0.971395	1.05327	0.572864	0.878355	0.827004	0.590776	1.00689	1.10823	1.00843	0.993968	0.966723	0.941631	1.00407	0.870293	0.944836	0.890625	1.22069	0.960396	1.05545	1.11511	0.768915	0.653323	0.895143	1.00659	1.78134	1.30189	1.92492	1.31803	0.717803
	0.445097	1.062	1.1418	0.564077	0.633124	0.751346	0.624473	0.477568	0.931818	0.881097	1.74537	1.87421	0.521974	0.647975	0.785797	1.71503	0.345745	0.556536	0.694627	0.881768	0.333711	1.40594	1.4481	0.553637	0.721374	1.98062		0.639233	0.985774	0.772525	0.500154	0.622049	0.930701	1.2511	0.5775	0.443956	0.9	0.177872	0.963229	1.26354	0.177209	0.466784	0.582096	0.740411	8.23334	0.0770227	0.0713805	0.0763699	0.701444
	0.979253	0.253645	0.858146	0.632733	0.641924	1.09393	0.871369	0.488275	1.05217	1.05054	0.686987	0.865629	1.29333	0.855093	1.24774	0.481752	0.939467	0.953876	0.742999	1.09647	1.31428	0.766245	0.880909	1.00095	1.04375	0.63403	1.0814		1.10112	0.989723	0.819441	0.999318	1.01325	1.46286	1.05534	1.10846	0.972056	1.03817	1.03119	0.833036	1.13364	0.760082	0.769311	0.943548	1.01636	1.03467	1.11401	1.56232	0.756819
	0.672853	0.752514	0.700121	0.991413	0.649077	0.569536	0.721285	0.634953	0.86262	0.859505	1.06444	1.77593	0.429534	0.619855		0.819	0.581006	0.506976	0.669323	0.903778	0.595472	1.0764	0.804598	0.648246	0.851986	2.03045	0.549687	0.672425	1.10244	0.818347	0.58058	0.643741	0.920951	0.683417	0.796622	1.01852	1.10476	0.746439	1.05335	0.673077	0.467225	0.575101	1.18938	0.643872	1.07425	1.01458	0.919037	0.759812	0.97225
	1.30886	0.195858	0.549641	1.06671	1.20739	1.10275	1.44206	1.41783	0.872483	0.983705	1.04848	1.05882	1.31659	1.12141	1.27464	0.518499	0.850909	1.11689	1.18897	0.93032	0.733877	0.820687	0.863636	0.947433	0.913333	0.268566	1.20563	0.869452	1.96958	0.763675	1.11881	0.722983	0.606217	1.42663	0.930846	1.25223	1.00699	0.791411	0.965251	1.36709	1.02667	1.01069	0.892781	0.985969	0.855148	0.879747	0.930337	1.08814	0.980465
	0.293614	2.52521	1.23901	0.358919	0.597297	0.631852	0.571429	0.397802	1.08696	0.825018	1.73171	1.8855	0.225529	0.359338	0.461642	1.83957	0.563218	0.70998	0.283935	0.851631	0.3506	1.53053	1.032	0.398303	0.145098	3.42876	0.378672	0.516928	0.603015	0.903524	0.37181	0.695983	1.06422	0.632168	0.621964	1.12919	1.20554	0.472619	1.08654	0.706587	0.0507849	0.413572	0.486588	0.487695	0.594393	1.07547	0.933045	0.697947	0.789491
	1.02255	0.21636	1.27997	0.944411	0.66055	0.677101	1.16418	0.809524	0.844884	0.8973	0.263089	1.16875	0.970994	1.08905	0.754979	0.900045	1.27751	1.02959	0.903876	0.989932	1.30799	0.937557	0.743056	1.16611	2.36858	0.437033	1.17644	0.690313	1.21583	0.842199	1.38423	0.956593	0.907683	0.455366	1.05167	1.31294	0.935561	1.25275	1.0788	0.682432	1.06174	1.08226	0.823969	0.848076	0.661171	1.05357	1.04832	1.04179	0.90219
	0.947796	0.537258	0.605452	1.19339	0.851064	0.590273	1.41514	1.11297	0.770161	0.760143	0.76	0.621302	0.884123	1.38923	0.552616	0.411966	0.923077	0.603754	0.965997	0.675157	0.77973	1.1756	0.941176	0.70897	0.997167	0.318376	0.555802	0.574223	1.45027	0.709956	1.09033	0.699236	0.500514	0.877193	0.636414	1.02392	1.04119	0.881612	1.01593	1.08978	0.93482	1.00753	1.27517	0.694541	2.42837	1.18644	1.28066	1.27731	0.933468
	1.61583	0.18651	0.64113	0.988045	0.983553	0.956681	1.1907	1.02506	0.872881	0.920519	0.364481	0.541985	1.27862	1.02168	1.01018	0.46608	0.916388	1.02068	1.05687	1.00143	1.99519	0.755706	1.10268	1.16	1.07023	0.449489	1.29506	1.0837	1.46415	0.981649	1.14065	1.0348	1.14882	1.15226	1.13569	1.07656	1.01314	1.01597	0.888889	1.16172	1.19904	1.00191	0.868559	1.0679	0.683983	1.08415	1.21699	1.18403	0.838828
	1.14359	0.61098	1.25439	0.554569	0.89313	0.905018	0.95	0.553907	0.969466	0.961145	0.939583	0.986951	0.4969	0.927093	1.09187	1.10914	0.958333	1.12808	0.728169	0.998065	0.856247	1.32371	0.908517	0.902303	0.701224	1.16278	0.796836	1.00016	0.869806	0.841382	0.837478	0.868156	0.791322	1.37405	0.858213	1.08356	1.0419	0.814229	0.986276	0.915129	1.28701	0.64691	0.807801	0.857189	0.945355	1.24511	1.26659	1.19414	0.752117
	1.55494	0.193752	1.03445	0.95473	1.05942	1.43588	1.38839	1.15481	0.898876	0.993863	0.987552	0.872611	1.33896	1.53043	1.13831	0.728937	1.47112	1.20549	1.235	1.02229	1.16603	0.955393	0.963325	1.33007	1.57655	0.449528	1.78923	1.1445	1.88306	0.934593	1.24953	1.13278	0.82526	0.691633	1.14139	1.28101	0.926719	1.29749	0.937558	1.12991	1.62794	1.18625	1.03105	1.17702	0.546392	1.36611	1.26841	1.58271	1.33611
	0.183459	1.45456	0.837028	0.356345	0.813483	0.626484	0.565097	0.341989	1.61628	0.634508	2.39304	2.11111	0.288435	0.412979	0.475258	1.93176	0.465753	0.939778	0.707196	0.537196	0.225863	0.933573	0.728291	0.296753	0.534137	3.36492	0.371365	0.30896	0.754319	0.604948	0.384092	0.50402	0.533669	0.712217	0.569508	0.586854	1.19258	0.644144	1.156	1.53147	0.168928	0.424357	0.401015	0.583552	1.51169	0.278802	0.215901	0.221442	0.717459
	1.16595	0.115933	0.690294	0.931502	0.90818	0.771653	1.13684	0.716785	0.844595	0.925501	0.674614	0.663158	0.788413	1.44379	0.77706	0.577105	0.918919	1.12361	0.820653	0.996452	1.14395	0.695815	0.584956	1.05114	1.02295	0.338565	0.925026	0.891688	1.00463	0.806941	1.2595	0.950083	0.763383	1.11338	0.918761	1.11169	0.888377	0.911475	1.05815	0.713805	1.61715	0.950164	0.639619	0.823477	0.510067	1.06057	1.04194	1.02521	0.800894
	1.42453	0.108126	0.83207	1.13438	0.642978	0.625099	1.45806	1.11147	1.00334	0.987229	0.547812	0.593413	1.14456	1.02655	0.91492	0.656277	1.02392	1.01931	0.811083	0.93952	1.57599	0.776413	0.836364	1.2928	1.2	0.172264	1.24482	1.13706	0.7264	1.06394	1.14765	1.14339	0.936265	0.568807	1.05746	1.21114	1.01196	0.862745	1.08885	0.553049	1.44378	1.12577	1.00564	0.939075	0.737489	1.08588	1.14995	1.29844	0.949526
	0.855229	0.143905	0.599803	1.00111	0.954054	0.669725	1.10526	1.03846	0.934783	0.899978	1.87805	1.48855	1.42522	1.14894	0.620794	0.514806	1.4023	1.07412	1.11634	0.908321	1.26937	0.770519	1.08	1.04288	1.47059	0.319041	1.2481	0.739314	0.788945	0.752822	1.27938	0.866931	0.831975	0.962238	0.849911	1.16268	0.935335	1.05357	1.1	0.898204	1.45522	1.15022	0.951529	0.839581	0.411215	0.450734	0.393089	0.331378	1.06186
	1.44068	0.127832	0.737327	0.769573	0.878289	0.989663	1.20968	0.798368	1	1.05045	0.816799	0.97417	1.19872	1.24247	0.898711	0.705591	1.58503	1.08649	1.14639	1.01235	1.7483	0.666253	0.784861	1.1659	1.07576	0.574847	1.40984	1.0536	1.1596	1.07076	0.963503	1.1132	0.852612	1.33163	1.26658	1.17647	0.960193	1.10219	1.03901	0.67971	1.72501	0.892091	0.970476	1.15936	2.09037	1.03311	0.993103	0.918261	0.768235
	0.493597	0.679193	0.878424	1.11642	0.764865	0.760061	0.75188	0.413736	1.05072	0.662486	1.58537	2.19847	0.636648	0.761229	0.962651	1.06394	0.954023	0.625227	0.577251	0.700579	0.451613	1.73966	0.856	0.49406	0.622876	1.80995	0.379761	0.426541	0.557789	0.522055	0.584323	0.457767	0.511059	1.21678	0.617321	0.976077	1.21478	0.479762	1.01346	1.19162	1.00462	0.588864	1.24424	0.618316	0.452336	0.551363	0.477322	0.41349	0.628201
	1.40139	0.116014	0.726549	0.984771	1.02377	0.833646	1.19101	0.949127	1.0315	0.918056	0.577729	0.527692	1.50941	0.987805	0.663811	0.612164	1.45522	1.25452	1.12356	0.972015	1.53774	0.735255	0.946154	1.20934	1.04403	0.260885	1.49134	1.19369	0.906667	1.06092	1.13791	1.20776	1.0497	0.975706	1.05433	1.11409	0.940774	1.27108	1.06221	1.04886	1.24964	1.14991	0.748231	1.10332	0.926531	1.18693	1.25439	1.33851	0.937037
	0.918339	0.40357	0.545972	1.09535	0.77836	0.636537	0.958084	1.05941	0.811594	0.701081	1.56333	0.705579	0.790994	1.01101	0.818782	0.496257	1.0303	0.65203	0.912527	0.609005	0.681257	1.11298	1.05036	0.655497	0.725352	0.738638	0.75914	0.688382		0.65765	0.930168	0.608649	0.653074	0.92437	0.786662	0.839779	1.22103	0.698962	1.0138	1.11661	1.06381	0.86181	0.837027	0.654545	0.515666	1.00103	1.0974	0.864275	0.983474
	1.72303	1.53825	0.749313	1.23538	1.16961	1.08072	1.6161	1.8383	0.95122	0.905036	0.923633	0.507592	1.70735	1.20042	1.20756	0.754846	1.08464	1.38667	1.01767	0.928415	1.69312	0.383774	1.16612	1.37399	1.32969		1.45042	1.87002	0.801822	1.18244	1.25627	1.40138	1.46827	1.64779	1.1885	1.03401	0.978469	1.15079	1.11281	1.07521	1.41146	1.46522		1.32939	10.952	1.32035	1.49537	1.48387	1.40812
	1.27762	0.248337	0.793232	1.28279	1.03506	1.07519	1.40351	1.6052	0.864865	1.01157	0.684432	0.527126	1.48531	1.24852	1.07674	0.559951	1.30811	0.893278	1.14737	1.01871	1.35156	0.649906	0.838938	1.07585	1.14098	0.326901	1.23309	1.23554	1.05093	1.00366	1.32642	1.09637	0.943683	1.59142	1.03546	1.33506	1.03107	1.08852	1.03908	0.976431	1.69021	1.14925	1.19657	1.08642	0.767338	1.09033	1.07947	1.15294	1.06602
	1.3251	0.277665	0.503793	1.01711	0.906931	1.0308	1.08287	1.24518	1.0619	1.05011	0.6633	0.604348	1.5243	0.834915	1.12335	0.543943	1.6114	0.932748	0.958598	0.953566	1.3541	0.466488	0.911854	1.14386	0.357143	0.23525	1.20834	1.10986	1.50513	1.0526	0.852596	1.2203	0.893721	0.918919	1.64563	1.02256	1.02995	1.20899	1.06204	0.469231	1.0316	1.11085	0.954198	1.13171	0.576835	0.756371	0.666667	1.39662	0.815344
	1.08972	0.160758	0.641234	0.922164	0.966912	1.06598	0.912181	0.62707	0.786047	0.795876	1.22141	1.16701	1.05124	1.05611	0.673276	0.435706	0.810496	0.907375	1.20374	0.864819	0.72487	0.732746	0.784211	0.858314	0.807496	0.733986	1.00803	0.641063	0.812367	0.751583	0.82369	0.716943	0.647502	1.4217	0.874052	0.882353	0.990783	0.847784	0.972542	1.3494	0.650772	0.81563	0.917341	0.874261	0.470157	0.846572	1.14351	1.25	0.846237
	1.32521	0.0942157	0.278625	1.09492	0.968153	1.03921	0.924791	0.767947	0.691064	0.840145	1.64611	1.42143	1.37106	0.93178	0.991108	0.311216	1.0442	0.691531	1.22623	0.743796	0.921075	0.859815	0.710744	0.908102	0.919598	0.577793	0.969005	0.508132	1.34637	0.663655	0.998648	0.76656	0.396297	1.21339	0.950902	1.00312	0.984446	1.05079	0.971933	1.36278	0.768175	0.916215	0.924054	0.90281	0.53081	1.05896	0.985417	1.26786	1.06145
	1.31903	0.464589	0.560653		0.953748	1.14556	1.0274	0.954497	0.964371	0.940648	0.80991	0.984127	1.02449	1.48566	1.30621	0.415469	1.02381	0.945878	1.25256	0.87084	1.24321	0.663942	0.939297	1.04613	0.694444		1.52479	0.938026	1.17169	1.0057	1.21649	1.0833	1.04055	1.42857	1.18946	1.00957	0.927168	1.09053	0.95922	1.01939	1.01372	0.95163		1.13703	0.641285	0.997859	1.05263	1.02463	0.99051
	1.74713	0.149584	1.04229	1.06088	1.27405	1.56472	1.27523	1.40766	1.22148	1.22755	0.488595	0.503139	1.76434	1.17369	1.0262	0.641646	1.10059	1.33106	0.992123	1.25802	1.53302	0.642478	0.91791	1.35049	1.1954	0.194258	1.72197	1.47412	1.16879	1.51249	1.19448	1.46714	1.04146	1.23614	1.46267	0.898089	0.895745	1.47541	0.874307	1.48988	1.37102	0.991942	2.19958	1.69836	0.466667	1.16309	1.30456	1.03125	0.788645
	1.16382	0.225774	0.600587	0.941086	0.724196	0.442337	1.10323	1.22321	0.849498	0.815497	1.11291	0.838323	0.738095	0.995084	0.488268	0.52642	0.832536	0.881446	0.882417	0.685214	1.01389	0.879279	1.11273	0.866719	0.937143	0.194912	0.826471	0.645613	0.6848	0.677089	1.04064	0.722674	0.796304	0.753211	0.662517	0.979118	1	0.997199	1.05671	0.780488	1.23695	0.988152	0.971418	0.679157	1.74363	1.0229	1.08376	0.596888	0.891599
	1.64283	0.201966	0.890947	1.06571	0.728341	1.32164	1.30827	0.875868	1.1411	1.19843	0.757025	0.488446	1.32966	1.30556	1.62044	0.698067	1.37838	1.14514	1.05858	1.23188	2.00566	1.05981	1.13944	1.51112	1.54264	0.542149	1.60321	1.79153	1.4303	1.61978	1.41358	1.70275	1.36414	0.955414	1.26361	1.33898	0.937209	1.16724	0.963602	0.881119	1.40412	1.14836	1.12875	1.42951	0.365785	1.20825	1.23851	1.52427	1.16164
	0.273832	3.09556	1.5074	0.415178	0.881988	0.701788	0.54321	0.464348	1.53513	0.764305	1.05747	1.12929	0.269184	0.398319	0.542077	2.09955	0.536842	0.737722	0.335282	0.789026	0.322459	1.82783	0.948229	0.383274	0.18705	3.70414	0.442531	0.464406	0.574812	0.875742	0.39574	0.753795	0.914164	0.618519	0.722845	1.20792	1.08079	0.703125	1.02197	0.845481		0.483663	0.467591	0.621552	0.398281	0.589404	0.780669	0.370492	1.00394
	0.215127	1.92904	1.27273	0.475431	0.679831	0.957476	0.310092	0.418501	1.09841	0.822595	1.52228	2.11881	0.336252	0.403226	0.522171	2.13328	0.450593	0.762897	0.332354	0.683623	0.356087	1.40623	1.48096	0.45285	0.406383	3.03754	0.416037	0.618839	0.453171	0.788631	0.329871	0.670643	0.735603	0.715909	0.634768	0.984326	1.17089	0.507591	0.897059	1.70694		0.348611	0.694516	0.638933	2.10848	1.12185	0.997854	0.877898	0.578457
	1.07877	0.484464	0.917214	0.549338	0.963289	0.85299	0.984962	0.439449	0.95092	0.92558	0.730579	0.61753	0.460099	1.00278	0.883056	1.1333	0.635135	1.10504	0.748991	0.876513	1.00543	1.23175	0.948207	0.975917	0.976744	1.00627	0.8113	1.01995	0.771717	0.849839	0.797188	0.92044	0.811419	1.505	0.868606	1.0791	1.03953	0.860068	1.01149	0.881119	1.54294	0.67879	0.677762	0.929496	0.758582	1.21649	1.19694	1.2945	0.790287
	1.30621	0.1076	0.798503	0.910273	0.822727	0.697347	1.31025	0.824841	0.901803	0.911511	0.756136	0.635781	1.25709	1.25573	0.760028	0.57959	1.12802	1.0198	0.787263	0.921238	1.6095	0.915005	0.830365	1.06802	0.995268	0.506329	0.938349	0.819099	1.27371	0.797527	1.213	0.879097	0.822679	0.816382	0.98232	1.05838	0.972077	0.864319	1.03856	0.966586	1.4746	1.0642	0.775786	0.887301	3.04081	0.925723	0.941676	0.894566	0.852833
	1.45418	0.153912	0.834423	0.956836	0.986842	0.976091	1.04839	0.77195	1.07042	1.12636	0.93845	0.848708	0.904655	1.13056	0.994475	0.521206	0.768707	1.17419	0.91176	1.07945	1.32478	0.932605	0.812749	1.17604	0.992424	1.00886	1.17038	1.26201	0.913131	0.97283	1.23284	1.19249	1.10005	0.845238	1.27666	1.13165	1.02051	1.08759	1.00856	0.797101	1.1505	0.840882	0.645397	1.04642	0.917955	1.18322	1.15172	1.17565	0.784606
	0.564662	0.402593	0.858771	0.710961	1.20899	0.809824	0.559557	0.476769	1.10465	0.929938	0.916606	0.928889	0.576557	0.814159	1.19295	0.749961	0.871233	0.89254	0.848996	1.00193	0.728379	1.23105	0.49972	0.811157	0.457831	1.11544	0.811416	0.523281	0.892514	0.799183	0.720636	0.733442	0.85545	0.829864	0.785388	0.680751	1.08585	1.04054	1.138	1.22378	0.489939	0.595342	0.677101	0.877732	0.579137	0.451613	0.47205	0.565619	0.540727
	0.166754	2.46442	2.10827	0.271126	0.511025	0.604224	0.44186	0.272481	1.10103	0.608794	1.77717	1.96682	0.327628	0.413194	0.481871	4.31042	0.394052	1.0849	0.311714	0.569597	0.356884	1.12277		0.27618	0.355263	3.1934		0.292148	0.562085	0.502545	0.342976	0.490095	0.409921	0.601736	0.662434	1.00862	1.28404	0.439462	1.01767	0.754258		0.326882	0.341424	0.566886	1.11618	0.357414	0.326743	0.196084	0.701668
	1.17064	1.61589	0.9722	1.1545	1.21691	0.92254	1.1728	1.75428	1.12558	1.03086	1.15532	0.878351	1.11198	1.31463	1.08563	0.948029	1.86006	1.29693	0.989496	1.04657	1.27535	0.70946	0.921053	1.28895	1.18569	0.203895	1.30028	1.32189	0.831557	1.02846	1.11686	1.22669	1.0638	1.17584	1.30188	1.27273	1.03917	1.08671	1.04872	0.813253	1.27884	1.49564	0.957225	1.14786	1.0555	1.08596	1.07922	0.958861	1.23077
	0.188929	1.52786	1.4239	0.403003	0.561404	0.660046	0.589726	0.630389	1.24941	0.601561	1.57658	2.23413	0.298125	0.508408	0.483226	1.88881	0.494048	0.790687	0.73988	0.58481	0.245598	0.599101	0.792332	0.267986	0.3125		0.315081	0.221856	0.752294	0.454838	0.206937	0.43327	0.472907	0.980695	0.637187	0.803828	1.29017	0.55144	1.0195	1.15789	0.392455	0.46461		0.511582	3.33847	0.327623	0.244851	0.238424	0.629696
	1.01095	0.733333	0.534682	1.29896	1.09162	0.897361	1.37643	1.17256	0.965665	0.947093	1.27701	1.06697	1.61034	0.859619	1.17488	0.567379	1.01105	0.886978	1.05119	0.870159	1.12997	0.679737	1.19	1.15754	1.39655		1.36764	0.803372	1.25549	0.814649	1.03383	0.969914	0.760402	0.657845	1.1859	1.01357	0.923259	1.11872	1.00742	0.907801	0.747329	1.25272	0.93422	1.02057	0.680964	0.835882	0.908896	0.780255	0.920572
	1.26918		0.661328		0.702632	0.911794	1.14589		0.849341	1.02369	1.23765	0.935897		1.30616	1.01317	0.403663		1.16221		0.972298	1.15863		0.807122	1.1245	0.860215		1.23234	1.23433	1.09561	0.953973		1.17032	1.08729	1.27329	1.09107	1.18935	0.982293	1.05112	1.00486	0.703226				0.91896		1.26211	1.64251	1.34241
	1.88757		0.74055		1.10647	1.28727			1.00466	1.07348	0.728261	0.75			1.3117	0.725347		1.45456		1.10644	2.06361		0.786667	1.41655	1.49735		1.60463	1.68979	1.06582	1.33541		1.38283	1.28962	0.576155	1.33551	1.16427	0.955056	1.05754	1.00729	0.85044				1.34085		1.70337	1.53891	1.70671
	0.886401		0.500694		1.008	0.774898	1.5514		1.72919	0.853978	1.39827	0.952381		1.43474	0.763863	0.444926		0.911563		0.838411	1.31582		0.921136	0.857866	0.811594		0.88898	0.6648	1.46188	0.790926		0.823357	0.83806	1.58475	0.863294	0.967359	0.997285	1.07378	1.00731	1.53355				0.784362		0.891519	0.435629	0.334211
	0.906998	0.342464	0.906133	1.10304	1.1378	0.889744	0.953846	0.630922	0.926471	1.10906	1.03714	0.711409	1.09953	1.27072	1.17654	0.825463	0.944606	1.08524	0.918458	1.09056	1.25951	0.701659	0.821918	1.17505	1.27168	0.486592	1.21141	0.646034	0.653846	0.779601	0.898168	0.908711	0.786894	0.568421	1.21596	0.87703	0.634254	0.549266	1.01719	0.775068	1.07896	0.981548	1.18313	1.0194	1.12924	0.320693	0.552448	0.559375	0.740167
	1.14719	0.135367	1.0352	1.04644	0.858015	0.664129	1.04719	0.999017	0.891641	0.863749	1.19882	0.976303	0.743682	0.921739	0.519457	0.980447	0.794326	0.647915	0.848559	0.865043	1.03636	1.2721	0.826667	0.734944	1.12453		0.723861	0.67439	1.0721	0.698485	1.11568	0.700317	0.69095	1.24538	0.827687	1.0585	1.04082	0.761194	1.00188	0.758123	1.2893	1.08103	1.19046	0.722065	0.81866	0.827887	0.860335	0.7557	0.785239
	1.0591	0.65409	0.811445	0.688891	0.910426	0.668444	0.81203	0.622806	0.889571	0.97818	1.05455	0.784861	0.827188	1.13056	0.93586	0.708004	0.817568	1.03773	0.806032	0.944901	1.27009	0.899022	1.28287	1.12212	0.782946	0.679545	1.15458	0.882184	0.824242	0.980969	1.12361	1.02	0.816998	0.729754	0.97479	1.16384	0.95814	0.805461	1.06322	0.645455	0.794118	0.794225	0.71068	0.890644	4.3928	1.08866	1.16193	1.1068	0.858965
	1.59691	0.109817		0.761222	0.935275	0.814107	0.677948	0.646932	0.758865	0.918747	0.472593	0.477686	0.506233	1.16515	0.706725	0.245336	0.587302	0.89275	0.938888	0.981704	1.24777	0.766189	0.648905	1.12568	1.03273	0.59238	1.0136	1.36572	0.92827	1.00876	0.937263	1.07212	0.911137	2.3389	0.895585	1.09406	1.15643	0.934579	1.03486	0.993711	1.03654	0.790699	0.915558	0.987066	0.994853	1.35797	1.39173	1.56814	0.753973
	1.02757	0.426048	0.852013	1.33285	0.763573	0.561002	1.10787	1.24335	0.812749	0.668535	0.488263	0.658436	0.779313	1.23391	0.585774	0.744646	1	0.731341	0.947995	0.670357	0.701818	1.1376	0.913433	0.720678	0.946939	0.417089	0.757777	0.64698	0.913151	0.689012	1.14773	0.653366	0.682654	0.907801	0.779471	1.10264	1.05634	0.778947	1.0206	1.11284	1.24778	1.12597	0.914678	0.648345	1.21916	1.07883	1.12814	1.00185	0.946001
	1.14316	0.141621	0.598242	1.16017	0.855124	0.9852	1.08359	1.38922	0.765854	0.759899	0.465428	0.546638	1.06053	1.4081	0.560872	0.45057	0.76489	0.773803	0.984815	0.696457	0.778118	0.800374	1.02932	0.827126	0.710383		0.948693	0.995264	1.03645	0.843382	1.03471	0.694882	0.7113	1.13285	0.771813	0.598639	1.30144	0.75	1.03633	1.27019	0.618615	0.950945	0.817277	1.03789	0.689866	0.839827	1.44676	1.25653	0.679498
	0.401433	0.880377	0.887997	0.635211	0.575758	0.397726	0.732468	0.381786	0.854962	0.583459	1.80909	1.86301	0.203861	0.631579	0.317209	0.91066	0.398601	0.671268	0.542613	0.618817	0.321521	1.25761	0.763158	0.368098	0.399091	1.5221	0.332363	0.244324	0.924915	0.521042	0.544714	0.452459	0.596659	0.539259	0.492086	1.4106	1.41397	0.7	1.01904	0.514182	0.535073	0.553057	0.741687	0.399227	0.916112	0.4847	0.78481	0.43002	0.693651
	1.09225		0.367959			0.518799	1.6058			0.638645	1.74174	0.576206		1.79715	0.636977	0.304434		0.511492		0.637814	0.756624		1.11945	0.743801	0.857881		0.580335	0.554201	0.878788	0.639374		0.635927	0.523555	1.97732	0.666009	1.10692	1.01398	1.13665	1.01561	0.988235				0.64365
	0.781429	0.785296	0.87848	0.648148	0.953073	0.993707	1.15051	0.86441	1.02084	0.858802	0.953047	1.06975	0.949777	1.41455	0.693798	0.733516	0.698606	0.908567	0.755938	0.88777	0.442765	0.655137	1.51753	0.599108	0.814816	0.760163	0.636608		1.06607	1.04128	0.984465	0.678785	1.21667	1.4878	0.706205	1.20839	1.08922	1.04038	0.986128	1.30322	1.26283	0.784517	0.863447	0.760493	1.74088	0.754019	0.919765	1.02079	1.06035
	0.943769	1.07836	0.842356	1.18188	1.08178	0.98128	1.04785	1.33021	1.23445	1.06222	1.30909	1.47368	0.998106	1.226	1.54112	0.81129	1.55849	1.2581	1.21578	1.1145	1.16401	0.597738	1.02564	1.23754	1.25043	0.249556	1.33765	0.592996	0.814621	0.988554	1.20563	1.18417	1.03977	0.853219	1.35218	1.11359	0.988318	1.20543	1.04891	0.707775	0.880487	1.39341	1.09139	1.09872	0.901885	0.309524	0.273731	0.333333	1.30541
	1.47901	0.757525	0.488763	1.55517	1.14198	1.01519	1.48993	1.84428	0.969555	0.835792	0.960352	0.653251	1.03768	1.65702	0.997778	0.388804	1.48	1.13287	1.30562	0.851	1.46458	0.593347	1.07872	1.18874	1.12319		1.53727	1.21483	1.6118	0.977248	1.55431	1.17594	1.0078	0.892063	1.26012	1.05908	0.899297	0.988679	0.995434	0.875676	1.43158	1.49897	1.47432	1.14252	1.50389	1.16908	1.21739	1.25994	1.83714
	1.08745	0.206528	0.520004	0.874928	0.994595	0.910439	1.00344	1.16315	0.860825	0.831333	1.21838	0.899358	1.35811	0.621167	0.892647	0.409725	0.849498	0.91597	1.16403	0.843944	1.48997	0.679317	0.897436	0.941615	0.627949	0.301282	1.05583	0.889946	1.03806	0.862543	0.973535	0.895675	0.661711	0.462379	1.06255	1.02525	1.06872	1.21287	0.856115	0.685535	1.05631	1.12809	0.887599	0.992042	0.610315	0.554688	0.782796	0.795563	0.903385
	1.10882	0.117478	0.647301	1.67016	1.06579	0.634918	1.47556	1.93692	0.912548	0.882996	1.44562	0.807648	1.21866	1.75871	1.07686	0.66449	1.32061	0.677782	1.09582	0.947778	0.821333	0.98464	0.896552	1.02908	1.13469	0.509041	0.838042	0.774235	1.68732	0.725061	1.4012	0.803554	1.00108	1.10468	0.844472	1.34826	0.960094	0.962963	1.1	0.75	1.2465	1.5087	0.977999	0.765776	0.833959	0.92735	1.09831	0.990164	1.24334
	0.783325	0.179955	0.620632	1.18214	0.944858	0.735021	1.11465	1.30291	0.852878	0.767033	1.22544	0.934579	0.667651	1.18083	0.598772	0.494656	0.705336	0.828578	0.875518	0.733437	0.727943	0.870422	0.561111	0.812461	1.00226	0.253079	1.02955	0.605222	1.46316	0.577149	1.08793	0.630691	0.474623	0.438719	0.939362	0.854701	0.977621	0.843091	1.05104	1.04854	0.61611	0.960312	0.663147	0.865092	0.686223	0.449393	0.515508	0.476346	0.717571
	1.13594	0.22262	0.949274	1.11748	1.01024	1.23169	1.27703	0.775959	1.1388	1.24651	0.862731	0.787478	1.00963	1.06082	1.47185	1.56563	1.14284	1.14131	0.783391	1.2074	1.13934	1.31957	1.11528	1.18459	1.2142	0.680351	0.74592	1.08719	1.12856	0.843244	1.13866	0.912951	0.987882	1.03383	0.820846	1.22529	1.03831	0.66768	1.01605	1.49653	1.14978	0.976273	0.90668	1.20832	1.7886	0.668421	0.701135	0.805244	0.737758
	2.03269	0.191314	0.877207	1.71492	1.48515	1.47304	1.3311	1.94374	0.919614	1.22224	0.97035	0.633828	1.75396	1.43851	1.31296	0.855328	1.5265	1.52694	0.923718	1.26785	1.83302	0.725814	0.971609	1.55157	1.6309	0.243889	1.62462	1.6146	1.09605	1.37783	1.34342	1.485	1.07192	1.44138	1.36018	1.34819	0.978236	1.40856	0.920837	1.16	2.15656	1.63598	1.20444	1.42683	1.20658	1.22902	1.27675	1.4023	1.05908
	1.66444		0.747983		0.734349	0.875497	1.30968		0.936455	1.03243	0.361967	0.309581		1.46509	0.962923	0.58047		1.08241		0.91049	1.45516		0.894545	1.22168	1.22857		1.06411	1.36304	1.0016	1.04504		1.13524	1.07349	0.802752	0.938891	1.16473	1.02153	1.07563	1.03781	0.780488				0.969667		1.15267	1.22647	1.46818
	1.29989	0.123335	0.628752	1.06145	0.98091	0.668845	1.30075	1.1749	0.932515	0.874135	0.561983	0.49243	1.45735	1.15	0.684889	0.528444	1.42568	1.23681	1.11253	0.864756	1.57958	0.725495	1.0996	1.18286	1.20155	0.290634	1.23867	1.0955	0.929293	1.01523	1.17962	1.11205	1.04594	1.27571	1.08787	1.00565	0.981395	1.00341	1.04981	0.881119	1.80824	1.2138	1.00914	0.97989	2.17783	1.20825	1.29978	1.43366	1.06598
	1.61453	0.401395	1.20192	0.842905	1.34214	1.23224	1.17293	1.2345	0.932515	1.2137	0.804959	0.450996	0.75454	1.36389	1.19397	0.991305	1.53378	1.619	1.02575	1.18902	1.52502	1.11826	1.41833	1.44544	1.37209	0.582576	1.30692	1.58535	0.993939	1.18271	1.34158	1.46864	1.27915	1.32666	1.24583	1.23164	0.962791	1.13993	1.03065	0.734266	2.22118	1.28193	0.951719	1.33065	0.960045	1.12577	1.08972	1.19094	1.25607
	0.967178	0.150321	0.584828	0.763983	0.694595	0.477569	0.947368	0.937363	0.963768	0.793598	0.970732	0.862595	0.640564	0.903073	0.473755	0.634396	1.09195	0.832314	0.88068	0.727278	0.79303	0.884439	0.88	0.867916	1.20915	0.318319	0.789082	0.701689	0.768844	0.631119	0.952848	0.694194	0.853124	0.555245	0.750089	1.01435	1.08083	0.869048	1.1	0.790419	1.44506	0.935587	0.753882	0.641849	1.24673	0.851153	0.87257	0.674487	0.804789
	1.03332	0.148674	0.745949	1.19865	1.0962	0.917102	1.01484	0.723895	1.03497	0.891888	1.04637	0.982801	1.35492	1.13312	1.17122	0.57532	1.21898	0.777711	0.90951	0.888389	1.03344	0.647475	0.554875	1.04591	0.814196	0.417532	1.0653	0.665685	0.970588	0.784502	1.03676	0.802697	0.55876	0.418519	0.942822	0.867416	0.587689	0.977413	1.07574	1.12957	1.24173	0.954218	0.913126	1.00144	0.483189	0.543779	0.373749	0.710018	0.82545
	0.701487	0.885929	1.03974	0.732334	1.13074	0.633454	0.506502	0.519914	0.960976	1.09466	1.45511	1.89588	0.832391	0.689512	0.771667	0.909906	1.33542	0.919812	1.0188	1.06141	0.882375	1.33627	0.931596	0.864565	0.961749		0.533824	0.723371	0.822323	0.816026	0.716107	0.712084	0.872678	0.892894	0.602883	0.979592	1.10048	1.02381	0.91587	0.568245	0.65891	0.713868	0.824601	0.617403	1.08262	0.530303	0.488426	0.491551	1.02704
	0.713639	1.40301	0.820078	1.02693	0.534351	0.840529	0.691275	0.688896	0.88993	0.861846	1.25991	1.21053	0.472464	1.03512	1.09111	0.652205	0.933333	0.947356	0.717513	0.89834	0.580112	0.844075	0.728863	0.815453	1.21014		0.71422	0.670008	0.776398	0.68037	1.14659	0.795272	0.797376	0.462434	0.893798	1.0547	1.07026	0.950943	1.02466	0.924324	0.690688	0.977532	1.13189	0.667692	18.2678	0.467633	0.3706	0.431193	0.66093
	1.19443	0.334185	0.769836	1.18346	0.58945	0.988283	1.27635	1.23607	0.759907	0.953983	1.12128	0.685083	1.36071	1.15498	1.22682	0.529357	0.957447	0.804688	1.01785	0.839817	1.33633	0.992937	0.72679	1.11568	1.33875	0.335042	1.36327	1.02564	1.13913	1.03163	1.20184	1.12344	0.97685	1.0917	1.34817	1.23779	0.988062	1.0727	1	0.789969	1.4055	1.24547	1.1578	1.02883	1.2685	0.971537	0.984071	1.2381	1.09352
	0.794163	0.122228	0.429452	1.12782	0.911854	0.561436	0.967213	0.753722	0.925926	0.714267	0.72	0.574902	0.846712	1.00779	0.669022	0.406912	0.824513	0.523285	0.919016	0.72391	0.550281	1.20267	0.578073	0.720134	1.09677	0.722725	0.554165	0.392482	1.01632	0.553491	1.1724	0.568537	0.568089	1.35804	0.743021	1.13146	0.992991	0.913433	1.03752	0.949254	0.693748	0.938021	0.587002	0.646468	0.685315	0.698285	0.756466	0.783646	0.869882
	1.12645	0.139215	0.553012	0.880611	0.778125	0.831757	0.892104	0.968435	0.930556	0.869808	1.08791	0.863309	1.29653	0.804795	1.05553	0.434859	0.965517	1.05924	1.29169	0.901964	0.993904	0.847666	0.708995	0.970621	1.14829	0.638309	1.07301	1.03646	1.37584	0.879382	0.799702	1.02617	0.882739	0.882187	0.962362	1.40107	0.942761	1.24324	0.993464	0.643333	1.1097	0.906164	1.19377	0.867238	0.937378	1.11201	1.00207	1.17296	0.808847
	0.749899	0.439932	0.936234	0.821423	0.690789	0.752086	1.10484	0.77467	0.887324	0.6558	1.24547	1.10701	0.795506	1.18221	0.742173	0.841805	0.795918	0.804636	1.00453	0.664297	0.790648	1.58024	1.00398	0.45972	0.893939	1.38017	0.435006	0.470687	1.13131	0.528162	0.923119	0.511617	0.746968	1.19048	0.684123	0.907563	1.19662	0.711679	1.01808	1.63043	0.767001	0.748038	1.03206	0.544491	1.25565	0.618102	0.606897	0.615652	0.863042
	1.01814	0.511554	0.849181	1.46467	1.03423	0.94705		1.68056	0.927835	0.967079	1.04285	1.02355	1.24927		1.13516	0.563773	1.18395	0.967443	0.923015	0.956392	0.983031	0.820346		1.02809	1.16152	0.234739	1.27811	0.651404		0.808684	1.25575	0.789301	0.663495		1.064	0.414141	1.05213	0.50495	0.672662	0.761006	1.55895	1.33065	1.10698	1.02537	1.12178	0.599609	0.55914	0.713154	0.996668
	1.55434	1.23631	0.774808	1.31823	1.3532	0.866566	1.723	1.44409	1.0533	0.889877	0.80424	0.593458	1.51889	1.21793	0.991657	0.59438	1.24826	1.11317	1.02003	0.953243	1.70416	0.738586	0.936508	1.34668	1.40858	0.298735	1.46112	1.06916	1.56842	0.932139	1.19646	1.17162	0.891929	0.523677	1.18773	1.01709	0.918728	0.98829	1.06994	0.752427	1.68212	1.48242	1.27728	1.15721	0.744459	1.10526	1.13155	1.07993	1.25629
	0.984745	0.25	0.53682	0.660042	0.671642	0.387461	0.735294	0.758704	0.910769	0.790177	1.01328	0.779923	0.669978	0.940653	0.380385	0.529481	1.19417	1.0511	0.920583	0.764286	0.871406	1.27067	0.890323	0.755828	1.07755	0.504964	0.857737	0.706305	0.997722	0.618613	0.933611	0.662713	0.67065	0.432971	0.890125	0.93617	1.03121	0.830986	1.03596	0.7	1.32653	0.831842	0.564356	0.616454	5.93213	0.853814	0.643991	0.362098	0.693079
	1.2501	0.277778	0.566014	0.888462	1.03887	1.0285	0.978328	0.910804	0.897561	0.842751	0.883385	0.898048	1.1583	1.25234	0.54112	0.422324	1.53605	1.00845	1.1899	0.807422	0.83503	0.901788	1.04235	0.878978	0.641166		1.01391	0.864707	1.08428	0.818783	0.889605	0.780715	0.774768	1.47271	0.860943	0.970522	1.06459	0.956349	1.0478	1.25348	1.00681	0.847056	0.884883	0.904327	0.765975	1.08225	1.41204	1.46237	0.992393
	1.27623	0.279194	0.556071	0.698463	1.2844	0.909326	1.17612	0.765499	0.930693	0.975958	1.21073	1.00625	0.56253	0.985158	0.866451	0.624889	0.660287	1.06405	0.944383	0.972261	1.02398	1.33384	1.01389	1.22669	1.26888	0.592002	0.735812	1.04057	1.15827	1.00135	1.02152	1.03807	0.94176	1.0331	1.15245	1.19059	1.03103	1.02747	0.981238	0.702703	1.76107	0.862238	0.741766	0.90975	1.13108	1.08532	1.07983	1.16119	0.967893
		0.279906		1.33331	1.23636		1.71429	1.87214	1.00763		0.891818	0.705479	1.45997	1.45614			1.3007		1.06321			0.79791	0.857895		1.70909	0.247862			1.19795		1.56901			1.4		0.0335099	0.187282	0.181765	0.242974	0.0340364	1.88581	1.16795	0.901645		0.879634	1.41248	1.88291	2	1.07687
	1.09613	2.07528	0.405142	1.1594	0.90312	0.992514	1.11439	1.3546	1.06112	0.990087	1.37021	1.33333	1.19458	1.28907	1.11859	0.504428	1.75551	1.11945	1.00314	1.06221	1.02002	0.813872	0.850932	1.12757	1.35196	0.279463	1.37299	0.962273	0.949074	0.957563	1.44068	1.08928	1.07396	1.06094	1.40418	1.0197	0.869374	1.33613	1.05408	0.784314	1.30698	1.38996	0.769791	1.0854	3.06251	0.545637	0.649667	0.56049	1.17901
	1.00715	0.302973	0.735196	0.897184	0.832685	0.896529	0.883721	0.577236	0.870103	0.932068	0.803828	0.744076	0.564521	1.39583	1.5058	0.638577	0.713755	0.839665	0.896133	0.86354	1.04959	0.868317		0.874286	0.574561	0.957244	0.649893	0.943078	1.0237	0.916572	1.05107	0.947517	0.840321	0.692382	0.978595	0.892241	1.11033	0.874439	0.978605	1.03163	0.625613	0.715526	0.547748	0.973321	0.653257	1.12548	1.20708	1.21084	0.722969
	0.956382	0.158785	0.674489	0.885089	0.80303	1.00887	0.822711	0.659144	0.791753	0.772214	0.529557	0.527578	0.817781	0.988701	0.747446	0.530837	0.931596	0.91003	1.00441	0.658629	0.651278	0.857012	1.10185	0.794136	0.863158	0.62839	0.947647	0.68601	1.21495	0.811116	0.811729	0.635317	0.677366	0.552672	0.79507	0.861538	1.07784	0.775701	0.929032	1.35452	0.513542	0.66964	0.971585	0.95614	0.891509	1.09812	1.16597	1.26623	0.703109
	1.66006	0.140223	1.00504	1.56967	1.02111	1.68468	1.68675	1.98122	0.84984	1.01074	0.60069	0.548548	1.74616	1.61017	1.38047	0.824065	1.13408	0.911247	1.16925	1.06308	1.1881	0.768355	1.11877	1.15472	0.706859	0.296049	1.24507	1.28624	1.77561	1.15141	1.3045	0.950781	0.940851	2.11055	1.03097	1.15741	0.971429	0.883191	0.935015	1.94231	1.84031	1.31523	1.08165	1.3486	1.29219	1.19583	1.26258	1.57928	1.20724
	1.06123	0.169651	0.597186	0.867923	0.951782	1.04551	1.02532	0.661519	1.03409	0.836382	1.15362	0.909853	0.891481	1.26636	1.03049	0.383878	0.781915	0.882391	1.04338	0.83115	0.849241	0.743827	0.982278	0.806139	0.732824	0.632096	1.02634	1.02093	0.970711	0.936232	0.758309	0.901664	0.910538	1.38326	0.69154	0.751648	1.10682	0.66383	1.01704	1.03249	1.02387	0.736327	0.831566	0.957819	0.553216	1.27077	1.33109	1.50342	0.826508
	0.495422	0.147285	0.651058	1.268	1.06967	1.0703	0.759358	0.752875	0.917127	0.733149	1.21229	1.79167	1.23396	0.93456	0.911716	0.572309	0.538095	0.611563	0.975142	0.697789	0.415647	1.0123	1.02752	0.456018	1.09009	0.693916	0.857079	0.654306	0.817961	0.850892	0.696745	0.626365	0.823862	1.63717	0.75243	1.59216	1.16345	0.729897	0.780935	0.990881	0.217682	0.794785	1.6478	0.782688	3.08794	0.602922	0.758621	1.00995	0.850194
	1.17684	0.907427	0.976908	1.08476	0.836066	1.21925	1.59358	1.83299	0.972376	1.06376	0.585666	0.519271	1.177	1.85481	1.54497	0.9131	1.18095	1.32305	0.952905	1.11739	1.19178	0.727193	1.0948	1.44643	1.02252	0.220592	1.85783	1.5678	1.15291	1.22474	1.2731	1.6429	1.41153	1.51327	1.51982	0.862745	0.924067	0.680412	0.927589	0.310638	1.56503	1.2997	0.997305	1.46927	1.11555	1.50332	1.21609	0.61194	1.10987
	1.64021	2.09341	0.761386	1.40018	0.45082	1.04864	1.3262	2.33478	0.972376	1.0198	1.76109	1.59375	1.0584	1.49693	1.78548	0.798422	1.28571	1.18686	1.08401	0.96896	1.62036	0.717173	1.44343	1.52139	0.192793	0.177006	1.80245	2.59115	1.12864	1.50115	1.46845	2.17237	1.54924	1.00885	1.54483	0.255686	0.877735	0.486598	1.11641	0.674772	1.48291	1.71481	1.24549	1.54044	1.71439	0.265604	0.192184	0.294527	1.53131
	0.856427	0.192399	0.64876	1.25253	0.870813	1.08357	0.872964	0.861309	0.920771	0.834214	0.892954	0.831099	0.818414	1.24664	0.890244	0.470383	0.72314	0.750182	0.824925	0.781343	0.665642	1.02218	0.777202	0.744449	0.761029	0.489208	0.776754	0.863596	0.917989	0.88121	0.892781	0.811976	0.951632	0.91129	0.784203	1.00726	1.15668	0.738255	1.00942	1.34097	1.04982	0.952707	0.941629	0.877097	1.35502	1.01484	1.3747	1.36926	0.917834
	2.36106	0.290008	0.850925	1.88591	0.980736	1.27555	1.46939	2.00252	1.24303	1.17624	0.323005	0.509112	1.71891	1.40816	1.41078	0.817781	1.75641	1.6649	1.22062	1.10045	2.96823	1.10485	1.01493	1.70711	1.34694	0.255029	1.86269	2.29603	0.918114	1.7023	1.59486	1.81955	1.47624	1.16312	1.35735	1.31965	0.929577	1.29825	1.05431	1.01946	1.85761	1.64966	1.21432	1.5757	1.49701	1.33108	1.44192	1.85582	1.1596
	0.896412	1.43354	0.660206	0.984785	1.21429	0.971995	0.701639	0.735292	0.712919	0.949032	0.783799	0.565121	0.887595	0.828426	1.43113	0.605166	0.871166	1.02044	1.2243	0.955453	1.32325	0.610678	0.93038	1.12502	1.01825	0.314197	1.21526	0.934356	0.845815	0.979288	0.964105	1.17731	0.969982	0.71234	1.14377	1.01241	0.959739	1.04405	0.959786	1.17377	0.987255	1.17334	1.07943	1.03584	1.5327	1.30926	1.07399	1.36683	1.09682
	0.212944	2.19557	1.22851	0.389913	0.767857	0.471457	0.491216	0.312911	0.931034	0.524172	2.43182	2.52419	0.296316	0.344304	0.262546	2.71238	0.38193	0.538182	0.536034	0.562028	0.244614	1.30582	0.537688		0.197046	3.16311	0.27858	0.303493	0.549747	0.502789	0.371748	0.47121	0.517388	0.297071	0.521567	0.802083	1.27586	0.643564	1.06654	0.572662	0.0688121	0.338454	0.546578	0.491673	0.75656	0.584906	0.603604	0.403279	0.735773
		2.18803		0.734546	0.559843		0.748201	0.568461	0.98		0.992718	1.77966		0.466069			0.770764		0.692499			1.73359	0.820444		0.765286	3.3153			0.940711		0.71828			0.678733		0.769784	1.16222	0.733628	1.03243	0.586667	0.190681	0.497439	0.870243		2.41223	1.60622	1.35503	1.01905	1.07589
	0.153702	4.76485	1.0338	0.398581	0.724083	0.514954	0.588925	0.354256	1.07495	0.539984	1.2981	1.47989	0.296317	0.29417	0.201404	1.40248	0.46281	0.635439	0.42709	0.479255	0.196334	1.39155	0.896373	0.30752	0.234559	4.3168	0.388595	0.314557	0.62963	0.583941	0.355517	0.517906	0.505075	0.862903	0.47071	1.00242	1.31567	0.572707	1.02448	0.69341		0.544388	0.387909	0.514233	0.893173	0.597428	0.642005	0.393027	0.704487
	1.65529	0.2	0.923631	1.04708	1.11877	1.02595	1.27413	1.04352	0.931973	0.930743	1.18852	0.747287	1.47632	1.04798	0.867734	0.680612	1.06667	1.49689	1.16857	1.00541	1.86823	0.657061	0.753543	1.29273	1.66556	0.409553	1.97834		1.34562	0.982084	1.19303	1.173	1.21482	1.16346	1.46539	1.14336	0.93047	1.18269	1.02683	1.1875	1.30762	1.09531	0.939317	1.11205	2.87812	0.906977	1.17606	1.31476	0.790055
	1.11051	0.328139	1.13182	0.727862	1.03243	1.47172	1.07519	0.760989	1.02899	1.18868	0.685366	1.10687	1.49726	1.34988	1.06157	1.01253	1.12644	1.35923	1.05374	1.21932	1.19119	0.684833	0.4344	1.35964	1.53595	0.387932	1.69641	1.03433	1.0201	1.23454	1.16981	1.2453	0.976329	0.843357	1.16545	0.990431	0.935335	1.45238	1.02308	1.08383	1.10526	0.879048	1.00753	1.47979	1.19439	0.666667	0.615551	0.604106	0.86731
	1.41659	0.143614	1.43557	1.26788	1.23732	1.18651	1.27014	1.33797	1.1844	1.18502	0.774664	0.840278	1.59902	0.961194	1.26954	1.17214	1.20213	1.1406	1.18592	1.27871	1.43112	1.05843	0.758521	1.42532	1.36752	0.425228	1.1755	1.10985	1.50667	0.98278	1.42065	1.06018	0.950411	1.29534	1.16203	0.956268	1.07301	0.771946	0.994242	1.32016	1.30059	1.18082	1.04973	1.27628	1.1887	1.08842	0.929864	1.07666	1.05545
	1.55135	0.54946	0.772719	1.40787	1.10022	1.07972	1.8917	1.61382	0.867257	0.922619	0.410539	0.414376	1.54246	1.87311	1.39236	0.599504	1.2549	1.04826	1.32189	0.896071	1.44775	0.656168	1.3871	1.24052	1.30682	0.289524	1.44505	1.21553	1.72932	1.07863	1.36653	1.25695	1.09594	1.55245	1.29251	0.909091	0.461538	0.8523	1.30145	0.979351	1.65679	1.35431	1.23688	1.24566	0.598951	1.37182	1.55822	2.13015	1.34604
	1.26822	2.52673	0.778384	1.37548	1.04098	0.94694	1.29412	2.10688	1.05525	0.853819	0.967918	0.692708	1.50216	1.04499	1.1349	0.760052	1.05714	1.17411	1.07516	1.09922	1.25894	0.899104	1.17431	1.23159	1.47748	0.146777	1.40183	1.46802	1.08981	0.953938	1.2057	1.19264	1.08089	1.71681	1.1886	1.93725	1.37709	1.29897	1.03391	0.826748	1.19136	1.45163	1.13985	1.04433	1.26308	1.41567	0.731034	1.77612	1.44538
	0.850521	0.318263	0.418432	1.45982	1.11111	0.784726	1.19409	1.13205	0.727273	0.590136	1.50628	0.968553	1.52197	1.36604	0.493632	0.452494	1.1117	0.53977	0.658376	0.580689	0.492179	0.610633	0.76962	0.548654	0.80916	0.240376	0.719699	0.577408	0.9841	0.702358	1.13982	0.610028	0.719516	2.13216	0.623733	0.791209	1.14318	0.740426	0.977578	1.87726	1.2951	1.21802	1.75194	0.640952	0.647479	0.968716	1.04153	1.07534	0.877315
	0.913942	0.54349	0.688853	1.37875	0.943689	0.72174	1.19774	1.44277	0.914842	0.774818	0.733601	0.705882	0.837838	1.18016	1.00955	0.631579	0.802993	0.81957	0.825835	0.780482	0.697619	1.1951	0.751295	0.951372	1.30366	0.144916	0.910932	0.693329	0.877743	0.677995	1.18976	0.643025	0.671675	0.81295	0.844772	0.743802	1.03044	1.0024	1.07593	1.0303	0.769919	1.15371	1.18335	0.889888	0.651376	0.911596	0.951081	0.835052	0.859886
	0.708026	0.127126	0.600588	0.902095	1.01887	0.681553	0.852321	0.765908	1.08523	0.758513	1.17513	1.03983	0.656525	0.971963	0.808568	0.514434	0.521277	0.68958	0.844668	0.729703	0.661755	0.788868	0.572152	0.780587	0.633588	0.405435		0.548744	0.895397	0.551336	0.831825	0.635524	0.539531	0.588546	0.741179	0.887912	1.07045	0.970213	0.886099	1.41516	0.635491	0.744417	0.687032	0.80928	0.372416	0.509169	0.460157	0.44863	0.540357
	0.226015	1.28942	0.847907	0.39095	0.48913	0.430111	0.645464	0.441044	0.924901	0.576344	1.74204	2.11913	0.218357	0.615385	0.459223	0.883924	0.6625	0.625871	0.504723	0.531533	0.241294	1.458	0.779352		0.1576	3.31636	0.31705	0.31573		0.482897	0.500014	0.417872	0.303748	0.833871	0.63944	0.905	1.17021	0.312838	1.13487	0.385625	0.378846	0.425951	0.474122	0.387207	0.860636	0.446105	0.522905	0.355932	0.753006
	0.20783		1.0642		0.643979	0.524374	0.565779		1.20601	0.486613	2.08251	1.62587		0.281109	0.420393	1.72025		0.672628		0.428336	0.278181		0.675	0.284272	0.319397		0.350443	0.275622	0.538191	0.485788		0.446578	0.348171	0.964083	0.648528	0.895928	1.28926	0.497717	1.02968	0.964539				0.506919		0.472987	0.390139	0.297771
	1.68128	0.130316	1.10655	1.29083	1.07578	1.84624	1.32346	1.43722	1.08933	1.04956	0.789272	0.585752	1.68984	1.37479	1.35049	0.955437	1.41053	1.01985	1.15412	1.00312	1.25279	0.76545	0.93733	1.10789	1.41007		1.24942	1.34047	1.72874	1.26735	1.35792	1.05849	1.01935	1.56481	0.975787	1.08911	0.980251	0.846875	0.947111	1.74927	1.36593	1.0783	0.857999	1.40383	0.762178	0.975166	1.98885	3.07213	0.921511
	0.957523	0.347269	0.633201	0.929436	0.905512	0.912047	1.23077	1.23784	0.960784	0.871758	1.63146	1.23937	1.41609	0.816101	1.00695	0.501685	1.09621	0.838945	1.22473	0.932812	1.62873	0.637636	0.808219	0.922855	1.37572	0.273631	1.04265	0.604506	1.19658	0.835013	1.00643	0.920625	0.788194	0.877193	1.06122	1.06729	0.954696	1.16562	1.0371	0.644986	1.1123	1.13445	0.969897	0.926459	0.71232	0.673889	0.48951	0.60625	0.99217
	1.17608	0.0633937	0.91494	0.747451	0.89771	0.593244	0.889888	0.687635	0.996904	0.859184	1.82762	1.0237	0.580024	0.915942	0.544053	0.678042	0.822695	0.911273	0.873864	0.89495	1.2488	1.04364	0.7	0.876601	1.15472		0.820398	0.630466	1.19122	0.656973	1.02444	0.729225	0.640625	0.667018	0.804582	1.11421	1	0.753731	1.06767	0.902527	1.63617	0.831348	0.915896	0.692584	2.48752	0.620915	0.507263	0.491857	0.524094
	1.56839	0.171343	0.826991	1.11162	1.20833	1.56392	1.12266	1.35127	1.13072	1.10527	0.401943	0.361338	1.77695	1.32767	1.28006	0.780696	1.24365	1.43471	0.964547	1.17215	1.74766	0.654509	1.06693	1.48844	1.31801	0.249921	1.86265	1.62694	0.797048	1.59822	1.43636	1.65892	1.1488	0.979504	1.45068	0.963731	1.13662	1.47766	0.960748	1.24042	1.74253	1.22526	1.60952	1.76507	4.0751	0.916583	0.874351	1.24051	0.949714
	0.633372	0.40466	0.754462	1.0853	0.892638	0.905654	0.748252	0.555847	1.1224	1.06931	1.31624	0.972344	0.546294	0.823308	1.32209	0.721596	0.642599	1.02033	0.731951	1.12016	1.16078	0.964597	0.632768	0.912775	1.18135	0.856419	0.885856	0.966946	1.25977	0.81632	0.931549	1.0601	0.938227	0.425833	1.00096	1.08315	1.06363	0.963947	1.04885	0.897436	0.692545	0.79987	1.24559	0.8692	0.705357	0.654751	0.492401	0.543909	0.650063
	1.87555	0.168265	0.821787	1.43862	1.09294	1.05729	1.06699	1.82525	0.894737	0.727208	0.318182	0.290526	1.1852	1.37	0.801354	0.599763	1.06792	0.958692	1.06892	0.805157	0.999011	1.01015	0.884615	1.13318	0.919932	0.253944	1.14495	1.67347	0.986945	1.18838	1.13845	1.00997	0.921787	0.803433	0.833753	0.837416	1.03505	0.926357	0.96558	1.33512	1.15965	1.15291	1.20716	1.29268	1.16578	1.09127	1.32892	1.78899	1.05659
	1.29704	0.119015	0.778682	1.0115	0.984293	1.13067	1.04192	0.921173	0.985507	1.14585	1.46924	0.913223	1.80374	0.97327	1.02303	0.564719	1.42424	1.38604	1.13633	1.16209	1.43881	0.72742	1.01439	1.28602	1.02113	0.352726	1.76295	1.17679		1.13502	1.08729	1.24338	1.13869	1.38655	1.42913	1.19337	1.00597	1.19723	1.01564	0.975265	1.8619	1.02669	1.00078	1.2402	3.68277	0.875386	0.88961	0.74883	0.872632
	0.542051	0.546454	0.633178	0.583822	0.488449	0.389313	0.632776	0.402782	0.688103	0.561564	1.39802	2.06528	0.509475	0.659881	0.441049	0.60618	0.614841	0.548934	0.59572	0.575223	0.422831	1.50113	0.555205	0.357083	0.725322	1.74392	0.360684	0.298283	0.689266	0.518626	0.59318	0.441604	0.518253	0.882759	0.462142	1.20891	1.2142	0.596109	1.00455	0.492	0.822785	0.434069	0.773333	0.393716	0.903947	0.566893	0.528905	0.364751	0.503269
	1.15559	0.200044	0.852234	0.816734	0.908563	1.73054	1.26263	0.67884	0.989091	1.05512	0.85118	0.82984	1.10441	1.23645	1.34475	0.569655	0.651357	1.20221	1.20726	0.97053	1.27289	1.0049	0.991667	0.933211	0.837736	1.1007	1.34382	1.0941	2.54795	1.09354	1.25899	1.01237	0.870011	0.908669	1.07062	0.986175	1.04841	0.948718	0.928983	2.14521	0.965569	0.805627	1.31036	1.18483	0.475478	1.00538	1.0872	1.18443	1.23803
	2.30952	0.144661	0.493719	1.54807	0.984848	1.27232	0.945455	1.09421	0.847328	0.863183	0.420909	0.328767	1.5707	1.11404	1.17922	0.383702	1.46853	0.812447	1.18571	0.829809	1.61034	0.607164	0.805263	1.36328	1.82727	0.273831	1.37912	1.78955	1	1.58282	1.35016	1.50827	1.5136	1.11852	1.44974	1.5298	1.0798	1.16471	1.06981	1.67273	1.25449	1.17629	1.53203	1.2898	1.30694	0.971848	1.99684	2.10142	0.846032
	0.7694	0.312557	0.502069	0.870266	0.767568	0.504555	1.39098	0.740659	0.956522	0.683114	0.679268	0.770992	0.670321	1.34515	0.680686	0.508786	0.954023	0.802447	1.01884	0.597379	0.752531	1.27873	0.6368	0.679261	1.0719	0.793388	0.422379	0.758999	0.864322	0.548227	1.26512	0.639528	0.608071	0.91049	0.592768	1.06699	1.0485	0.75	1.075	0.856287	1.19391	0.86241	0.705882	0.50637	1.08785	1.07547	1.04104	0.970674	0.849019
	0.699077	1.0334	0.763692	0.618764	0.958696	0.797959	0.934125	0.572212	0.963563	1.04446	1.60225	2.35896	0.558758	0.745958	0.842325	0.642568	0.622012	0.730415	0.784615	1.00098	0.921883	1.2945	0.977294	0.803514	1.03553	2.36708	0.544404	0.876035	1.05817	1.05238	0.737518	0.842779	1.09168	0.677702	0.918211	0.926333	1.06344	0.955081	1.03188	0.743459	0.473069	0.524537	0.610938	0.844884	0.779272	0.805395	0.662326	0.52883	0.806845
	1.69738		0.64061		0.923383	0.892658			1.55638	1.05762	0.815217	0.648684			1.03105	0.501055		1.19609		1.03358	1.44027		1.3	1.38506	1.40212		1.0707	1.34137	1.08705	1.14041		1.27083	1.44315	1.38049	1.04909	1.10663	0.966292	1.06065	0.995951	0.609971				1.05188		2.13144	3.38521	3.33922
	1.3897	0.168653	0.795665	1.04144	0.859459	0.958675	1.2406	0.953297	1.26087	1.12955	0.839024	0.7	0.884103	1.36879	1.30215	0.890661	1.16092	1.17463	0.791324	1.12795	1.34683	0.710112	0.792	1.26229	1.15686	0.497832	1.1362	0.972851	0.974874	0.997934	1.19394	1.02418	0.901242	1.03357	1.04446	1.06699	0.981524	1.01786	1.01923	0.934132	0.999077	1.09516	0.775529	1.07152	0.775701	0.955975	0.924406	0.958944	0.8856
	0.515976	0.148605	0.352249	0.852582	0.909317	0.410933	0.903704	0.652522	1.03903	0.418365	1.09579	0.881266	0.351949	0.914286	0.479857	0.433093	0.842105	0.487774	0.57366	0.383077	0.370788	1.008	0.675749	0.383983	0.628297	0.60901	0.386071	0.260631	0.751346	0.400241	0.839576	0.398993	0.338122	1.03704	0.574419	1.32673	1.07181	1.05313	1.01871	0.962099	1.00079	0.770336	0.70326	0.423129	0.593123	0.567881	0.923792	0.87541	0.797373
	1.30705	1.46825	0.80582	0.743185	0.742633	0.634518	0.992366	0.763801	0.781491	0.730768	0.557806	0.477801	0.45017	0.940731	0.929144	0.940819	0.916318	0.80387	0.852502	0.743539	1.36194	1.18761	1.04605	0.832898	0.672065	1.20167	0.628093	1.9949	1.17073	0.943469	0.86225	1.00305	1.01771	1.05728	0.806597	1.07538	1.04794	1.0181	1.05032	0.709302	0.700109	0.813237	0.727882	0.848642	0.949065	1.26305	1.47756	1.71941	1.07434
	1.89132	0.156261	1.10308	1.21425	1.26316	1.19207	1.9469	1.35179	1.16475	1.13463	0.685285	0.663076	1.52952	2.24831	1.17096	0.740528	1.06486	1.43758	1.14706	1.11989	1.6539	0.760074	0.998971	1.52557	1.4	0.191642	1.57379	1.76961	1.32544	1.32459	1.51582	1.5196	1.54065	1.13758	1.20824	1.35176	0.924331	1.35714	1	0.788644	2.56183	1.31712	0.954645	1.19513	0.867744	1.28009	1.2809	1.64286	0.945636
	0.213948	0.457974	0.889584	0.915158	0.527881	0.363969	0.636364	0.47301	0.861244	0.380345	1.73636	1.74737	0.359803	0.566	0.281845	1.06288	0.486792	0.704943	0.884401	0.378067	0.21817	1.43716	0.852564	0.207836	0.691652	1.78842	0.299834	0.235343	0.779809	0.372805	0.565557	0.356568	0.372597	1.08155	0.54064	0.797327	1.28738	0.554264	1.06522	0.686327	0.368393	0.652923	1.04079	0.382737	1.14113	0.230159	0.218102	0.140979	0.703282
	0.748722	0.0859716	0.88098	1.06041	1.03404	0.830503	0.901818	0.914084	0.957895	0.872292	1.04132	1.11777	0.633127	0.942761	1.06757	0.801784	0.763033	0.885038	0.857074	0.847862	0.789277	0.966729	0.765152	0.873584	0.699828		0.955798	0.603209	1.04839	0.721135	0.997022	0.72026	0.604458	0.849702	0.884376	0.876289	0.962719	0.897275	0.893845	1.06832	1.18257	0.924786	0.612693	0.890544	2.02954	0.620476	0.610738	0.57976	0.714494
	0.957643	2.04074	0.992428	0.756005	0.845295	0.892714	0.587671		0.783848	0.865897	0.646847	0.753968	0.585151	0.530168	1.22091	1.02198	0.571429	1.01487	0.809559	0.920577	0.990571	1.38047	1.06709	0.847035	0.885417		0.647033	1.60298	0.731324	1.2387	0.495656	1.06711	1.08184	1.57014	0.767985	0.789474	1.11214	0.843621	1.01418	0.930748	0.704557	0.485275		0.854928	0.604313	1.33191	1.43936	1.57307	0.786675
	1.26826	0.115092	0.568246	1.05412	0.728341	0.799247	0.909774	1.11529	0.809816	0.857225	0.795041	0.584064	1.22675	0.908333	0.973443	0.461668	1.08784	1.13236	1.24243	0.841172	1.05592	0.714123	0.804781	1.01804	0.914729	0.41126	1.18292	1.16854	0.610101	0.946024	0.987277	1.16109	1.05393	0.979072	1.05591	1.42373	0.962791	1.01024	1.07854	0.576224	1.38882	1.15002	1.0962	0.870003	1.70512	1.23711	1.18381	1.25243	1.01104
	1.54609	0.117502	0.757835	1.04886	1.23551	0.953297	1.07404		0.806324	0.937043	0.78727	0.60252	1.43865	1.58018	0.745427	0.530204	1.5	0.932938	1.18396	0.914416	1.03955	0.947864	0.906883	1.05806	1.328	0.196456	1.07729	1.02265		0.943253	1.35037	0.927133	0.707648	1.23065	1.02811	1.215	1	1.06081	1.00578	1.25625	1.83077	0.990014	1.40246	0.958623	2.41565	1.06297	1.12626	1.09492	0.88698
	1.88513	0.274806	0.974645	1.12199	0.901863	1.27447	1.48642	1.19826	0.735473	1.16656	0.51341	0.476517	1.39092	1.12437	1.4342	0.712512	1.2	0.957158	0.945455	1.17773	2.029	0.925113	0.877384	1.43376	1.44365	0.286884	1.43974	1.75161	1.44241	1.48545	1.31553	1.71039	1.37956	1.10185	1.27319	1.43894	0.924596	0.9875	1.00407	0.699708	2.45899	1.26115	1.09854	1.32437	1.2192	1.09768	1.61524	1.79344	1.28801
	1.62114	0.188113	0.973233	0.76023	0.940299	0.911545	1.30147	0.814313	1.05846	1.0837	0.573705	0.965251	0.907285	1.06825	0.754814	0.788567	0.951456	0.948901	1.03437	1.18996	1.27636	0.82364	0.759447	1.18959	1.34694	0.724734	1.15752	1.06243	0.965831	1.0804	1.07505	1.02853	0.919131	0.771739	1.16132	1.12766	0.917919	0.922535	1.069	0.730496		0.930646	1.01561	1.05779	1.20375	0.997881	0.975057	0.862944	0.87969
	1.57242	0.173415	1.20934	1.22775	0.970874	1.15002	1.49563	1.27592	1.07092	1.30891	0.874074	0.761157	1.18189	1.06788	1.39882	0.687777	0.904762	1.36363	0.819884	1.36964	1.69164	0.64517	0.751825	1.47912	1.64364	0.248085	1.32745	1.10876	0.911392	1.20353	1.07184	1.21652	1.01735	1.17263	1.2001	1.07426	0.924681	1.13396	0.959633	0.773585	0.974701	1.17321	0.949335	1.32466	0.70379	1.09931	1.25547	1.30265	0.930547
	1.15656	0.447839		0.970827	0.895775	0.643873	0.958313	0.870635	0.906481	0.897679	0.645953	0.869213	1.08282	1.37569	0.909383	0.434921	0.815886	0.951545	1.07028	0.857497	0.945694	0.892392	0.607547	0.977331	1.0025	0.675545	0.97271		1.19132	0.784511	1.21186	0.95189	0.72664	0.975318	0.890724	1.27703	0.985892	0.911858	1.04025	0.92104	1.25821	0.980486	0.724201	0.805526	0.603696	0.997203	1.07595	0.974846	0.869129
	1.16459	1.77528	0.789946	1.18399	1.10879	0.975446	1.69649	1.64324	1.3049	1.05609	0.917314	0.803738	1.19569	1.31685	1.26523	0.82865	1.40139	1.25649	1.0037	1.0827	1.32461	0.7954	1.05556	1.25929	1.24153	0.351878	1.52084	1.53107	1.35789	1.0707	1.27277	1.29085	1.23287	0.889972	1.29188	1.0812	0.892815	1.35363	1.01323	0.762136	1.49116	1.39952	0.908999	1.18316	0.821817	1.06073	1.03743	1.08972	1.28855
	0.846552	0.131879	0.630906	0.84296	0.953125	0.998955	0.879195	0.741374	0.812933	0.916088	0.953812	1.1914	1.05873	0.901587	1.28419	0.540193	0.840183	0.710504	0.851143	0.907014	1.06397	0.873886	0.766773	0.816947	0.618803	0.541944	0.759575	0.641199	0.849704	0.820063	0.818981	0.845269	0.79733	0.746753	0.628915	0.652695	1.11296	0.696203	0.944742	0.738372	0.72717	0.688161	0.874049	0.841835	0.929343	0.746392	0.6898	0.669951	0.620355
	2.04238	0.184267	0.718465	1.65889	1.08553	1.47248	1.50806	1.96076	0.950704	0.984683	0.725561	0.397048	1.52103	1.49785	1.17726	0.521206	1.08844	1.27248	1.35479	0.918036	1.65157	0.859873	1.13944	1.36548	1.36364	0.362316	1.5238	1.6476	1.3697	1.08596	1.60812	1.41083	1.12757	2.27891	1.17598	1.29972	0.998794	1.14599	1.01047	1.81884	2.28986	1.4914	1.1073	1.31863	1.51962	1.27594	1.34943	1.68696	1.07343
	1.05488		0.618313		0.8875	1.1164	1.31404		0.972222	0.907094	1.17582	1.23022		0.84589	1.27123	0.558484		1.09145		0.876111	0.749301		1.00076	0.940215	1.03422		1.18067	0.620504	1.28859	0.671337		0.706616	0.437852	0.895382	0.866565	1.17647	0.95174	0.75	0.97479	1.55333				1.02322		0.69223	0.719008	0.805031
	0.373467	1.83379	0.672645	0.721305	0.608586	0.576445	0.816918	0.441058	0.783505	0.557366	1.26847	1.61151	0.224002	0.516949	0.502704	0.634457	0.400651	0.565162	0.533945	0.456133	0.318883	1.42695	1.5	0.372826	0.72	1.73907	0.317444	0.322873	1.1215	0.509843	0.520603	0.390585	0.375686	0.928244	0.572167	0.778022	1.09701	0.574766	1.02304	0.850856	0.665716	0.551379	0.885153	0.536684	0.991038	0.632309	0.621849	0.49026	0.927851
	0.311024	2.10611	1.05259	0.380558	0.608126	0.998305	0.464478	0.414645	1.08251	0.741102	1.81937	1.86875	0.331907	0.32282	0.680562	1.97395	0.535885	0.803399	0.358211	1.14008	0.323079	1.40573	0.979167	0.482748	0.433233	3.276	0.39976	0.651858	0.791367	0.933607	0.363211	0.794217	1.05473	0.527583	0.634387	1.06824	1.25537	0.571429	0.981238	1.12162	0.17047	0.382732	0.725436	0.654075	1.95548	1.12698	1.01261	0.892537	0.600468
	2.05277		1.50336			1.39776	1.28696			1.30013	0.696697	0.829582		1.62456	1.3624	0.82122		1.67513		1.45889	2.02792		1.02389	1.80199	1.7416		1.78744	1.78608	1.51515	1.42421		1.74698	1.30334	1.18821	1.54837	1.27044	0.959925	0.913043	1.00904	0.658824				1.36657
	1.032	0.191091	0.538255	0.88731	0.835871	0.438507	1.13548	0.869729	0.896321	0.772453	0.607239	1.11976	0.784864	0.892822	0.497582	0.577016	0.947368	0.829644	0.930669	0.664602	0.787593	1.05258	0.792727	0.811598	1.70857	0.324972	0.711445	0.443701	0.7488	0.572657	1.10142	0.659302	0.490889	0.412844	0.753804	1.22042	1.02392	1.05322	1.04726	0.768293	1.35141	1.02103	1.00903	0.628439	0.556629	0.709924	0.717684	0.548798	0.813347
	1.57401	0.123639	0.836231	1.22622	0.802632	0.817705	1.31556	1.40408	0.980989	0.873731	0.733397	0.596756	1.3812	0.975124	1.17186	0.52199	1.06107	0.937305	1.33683	0.955329	1.05231	1.00204	1	1.11182	1.15102		1.08773	1.40126	1.43953	0.927967	1.12756	1.11873	1.0751	1.21362	1.05117	1.46269	0.943662	0.942761	1.08846	0.580921	1.45916	1.34479	1.33355	0.913352	1.23366	1.3312	1.33559	1.4918	1.02401
	1.18482	0.61083	0.741248	1.06587	0.868421	0.60138	1.42326	1.17262	0.807627	0.843021	0.402786	0.552672	0.677874	1.16494	0.475056	0.527028	1.11706	0.753349	0.976827	0.811364	0.948728	1.24429	0.998801	0.784436	1.01672	0.640836	0.6453	0.921565	1.04151	0.78194	1.17964	0.768645	0.684201	1.19506	0.682559	1.0622	1.02748	0.773163	1.02521	1.0429	1.4135	0.966809	1.03645	0.677081	4.33189	1.19344	1.3318	1.27431	0.97953
	1.23098	0.127266	0.846859	1.109	1.04937	1.65649		0.714237	0.87619	0.941742	0.710396	0.745875	1.40105		1.11536	0.560905	1.17787	0.77767	1.06214	1.05407	1.03842	0.751169		0.932188	1.00709	0.237612	1.1392	0.996776		1.07521	1.00593	0.89754	0.98996		1.05739	1.05329	1.06725	0.629703	1.07721	1.66581	1.08258	0.851543	0.920062	1.29665	1.93681	1.13235	1.03433	1.27975	0.822959
	0.525753	1.4648	1.21854	0.518025	0.603053	0.885369	0.785714	0.439517	1.01527	0.815259	1.30833	1.39976	0.52253	0.675068	0.852611	1.27401	0.541667	0.919974	0.54479	0.764401	0.468184	1.21832	1.02839	0.527651	0.641633	2.41365	0.471547	0.717439	0.891967	0.869492	0.506568	0.745309	1.03488	0.877863	0.681104	1.06739	1.21631	0.768379	0.964318	0.863469	0.082713	0.454127	0.736295	0.653314	0.91439	1.25662	1.23522	1.08425	0.856352
	1.75939	0.223156	0.677307	1.43245	1.2716	1.37609	1.32098	1.36102	0.933877	1.0108	0.8741	0.66075	1.47184	1.26472	1.49461	0.362593	1.14184	1.32235	1.33493	1.01132	1.58578	0.742523	0.936086	1.30108	1.20721	0.443855	1.59318	1.39807	1.12344	1.04167	1.56293	1.25844	0.963148	1.29806	1.16743	1.46342	0.912273	1.19721	0.977203	1.72595	1.49044	1.26178	1.37299	1.18662	1.28438	1.8733	1.9804	2.32942	1.06361
	1.05111	0.222845	0.677065	1.1515	1.02432	0.749382	0.877285	0.925188	0.967742	0.905577	1.13043	1.08876	0.927657	1.08032	0.844639	0.616667	0.655518	0.903407	0.981705	1.03085	0.94073	0.775128	0.612745	1.04039	1.17847	0.439271	0.879678	0.604908	0.972875	0.82387	0.875259	0.836774	0.860159	1.12281	0.905061	0.956938	1	0.992443	1.01406	1.02167	0.61206	0.858114	1.03378	0.840399	0.940083	1.06667	1.13679	1.15294	0.773838
	1.92799	0.145826	0.967071	1.40144	1.13687	0.998058	1.09322	1.3583	0.933976	0.919107	0.807979	0.553328	1.33109	1.29858	0.787979	0.837529	1.53112	1.07352	1.54619	0.917615	1.68163	0.675613	0.952291	1.31085	1.22012	0.212493	1.53758	1.76649	1.23524	1.18328	1.28142	1.27961	1.07515	1.19648	1.164	1.16289	0.933703	1.17716	0.985432	1.37034	1.67206	1.38478	1.30052	1.16071	1.75162	1.57833	1.6131	2.0594	1.10397
	0.819457	0.0954357	0.577726	0.642804	0.846658	0.553294	0.943284	0.611411	0.924092	0.894834	1.24476	1.03125	0.637185	1.04824	0.713911	0.489092	0.636364	0.761207	0.579791	0.829452	1.01064	0.975023	0.686111	0.834408	0.888218	0.847203	0.810681	0.506727	1.03957	0.648747	1.26124	0.703078	0.731929	0.774323	0.787939	0.917647	1.06205	0.961538	1.0469	0.912162	0.842282	0.724263	0.9261	0.687384	0.501237	0.527778	0.478992	0.483582	0.749309
	1.46566	0.13352	0.947199	1.52588	1.14248	1.30632	1.26908	1.49449	1.04153	1.16744	0.700806	0.749378	1.54729	1.33898	1.38933	0.806527	1.67039	1.24072	1.02479	1.31672	2.18277	0.882417	0.827586	1.38024	1.61011	0.383129	1.45743	1.13909	1.2	1.22487	1.34825	1.26641	1.02156	1.36935	1.25576	1.13889	0.954762	1.19658	1.01649	1.05128	1.17573	1.4814	1.36014	1.27349	0.712633	1.09375	1.10941	1.15542	1.05196
	1.27583	0.126185	0.532819	1.00095	0.894886	0.737949	1.06438	0.918471	0.85906	0.91288	0.737879	0.62605	0.96124	1.58499	0.923515	0.508468	0.930909	1.11278	0.90523	0.886813	1.16976	1.19215	0.688312	1.06829	1.14667	0.597343	0.89932	1.10647	0.973384	0.867133	1.24777	0.985502	0.818117	1.20245	0.967595	1.18694	0.941725	0.944785	1.05019	0.574684	1.54963	0.875696	1.2948	0.85852	0.644852	1.21941	1.11461	1.39322	0.8227
	1.28908	0.11784	0.592368	0.991438	1.00229	0.700062	1.23647	1.14269	0.588967	0.951616	0.773455	0.756906	1.49779	1.26061	0.754406	0.420819	1.33333	0.9483	1.04443	0.81532	1.62337	0.681649	0.949602	1.16471	1.16531	0.259425	1.30495	0.965172	1.12174	0.997753	1.27161	1.11439	0.870194	0.668996	1.33377	1.22476	0.958678	1.17932	0.974152	0.865204	1.58579	1.18419	0.872903	1.02361	0.719036	1.21822	0.789381	0.761905	1.00072
	0.146035	3.39841	1.99249	0.299571	0.621931	0.574705	0.550711	0.23791	1.35461	0.71962	1.74888	2	0.291548	0.250149	0.484334	2.1636	0.574468	0.534395	0.311379	0.717887	0.333293	1.14066	0.817984	0.428839	0.188889	3.75363	0.410876	0.381998	1.29333	0.647918	0.414224	0.637849	0.633684	0.532642	0.676708	0.862974	1.26327	0.447059	1.06718	0.366008		0.354366	0.419538	0.584624	0.422599	0.922105	0.762443	0.562181	0.733056
	1.77993	0.139204	0.596663	1.96428	0.921191	1.11643	1.42274	1.84615	0.844622	0.773528	0.358685	0.365667	1.41729	1.28728		0.44283	0.807692	0.963744	1.25155	0.741721	1.06147	0.788789	0.871642	0.98625	0.922449	0.200616	1.14486	1.52883	1.35484	1.34521	1.22327	1.03549	1.24406	1.39716	0.96236	1.18475	1.17371	0.85614	0.964419	1.64981	0.751288	1.21241	1.13408	1.08763	2.10299	1.35135	1.38443	2.15157	1.20848
	0.568459	0.305823	0.752634	0.890169	0.823695	0.468379	0.752294	0.616575	0.907937	0.579503	0.903465	1.0033	0.538704	0.780645	0.487948	0.59996	0.83004	0.426374	0.995383	0.553172	0.529486	1.44935	0.943583	0.51153	1.15603	0.778454	0.406906	0.38309	0.77561	0.382952	0.887773	0.456021	0.407155	1.00455	0.583263	1.11599	1.18633	0.543894	1	0.66838	0.752252	0.737901	0.725116	0.4306	0.778304	0.546218	0.506438	0.414219	0.743198
	1.06329	0.162794	0.668346	1.01738	1.43185	0.884061	1.14206	0.999205	0.740426	0.857014	1.04021	1.31429	1.07499	1.38436	0.878483	0.561443	1.0884	0.758387	1.18878	0.882062	0.973114	1.02333	0.710744	0.900386	1.31658	0.712559	0.989237	0.675774	1.21229	0.522737	1.27189	0.833324	0.566372	0.870293	0.889343	1.15888	0.958829	1.05079	0.987971	1.31861	1.29548	0.901324	1.12859	0.899732	0.302766	1.17925	1.06875	1.09524	0.899201
	1.32765	0.175229	0.910704	0.793396	0.74093	0.57378	1.25314	0.72554	0.948629	0.895153	0.539252	0.534141	0.660204	1.35246	0.419841	0.666866	1.02032	0.921653	0.911192	0.868801	1.16548	1.45435	0.930909	0.868821	0.984399	1.07176	0.454152	1.26893	1.25651	0.916563	1.16593	0.927678	1.14721	1.60429	0.645311	1.25326	1.11885	0.757674	0.841863	0.576327	1.80648	0.868573	1.02531	0.678949	0.742845	1.6656	1.86946	2.336	0.7685
	1.93965	0.142536	1.02078	1.1956	1.11538	1.14768	2.1148	1.46982	1.13725	1.16467	0.714026	0.432714	1.62997	2.07131	1.22985	0.617863	1.47208	1.47703	1.25872	1.12369	2.11371	0.69322	0.931774	1.56304	1.54789	0.468004	1.75491	1.92932	2.53875	1.3684	1.62672	1.66712	1.3512	1.06365	1.2518	1.11399	0.969001	1.189	1.04112	0.622997	2.44592	1.3565	1.03657	1.31675	1.38266	1.21005	1.1838	1.56329	0.91251
	1.70326	0.167677	0.58687	1.13342	0.858144	0.943403	1.48688	1.33725	1.05179	1.14756	0.696714	0.784245	1.38729	1.12245	1.00812	0.565906	1.35897	1.4557	1.00521	1.07932	1.71222	0.588891	0.81791	1.31443	1.38776	0.329903	1.84944	1.36266	1.11166	1.23368	1.19301	1.27193	1.17727	1.04965	1.33553	1.12023	1.02347	1.15088	1.0618	0.775097	1.73021	1.18444	1.32098	1.26693	1.88743	1.23423	1.30539	1.36044	0.97676
	1.96886	0.418645	0.826548	1.70532	1.03803	1.13356	1.69139	2.44792	0.932401	0.932929	0.606421	0.408354	1.7323	1.53249	1.22298	0.51448	1.43796	1.0413	1.40295	0.91623	1.76883	0.726407	0.902507	1.35098	1.53236	0.294487	1.49263	1.72649	1.67647	1.26175	1.79231	1.44029	1.23468	0.975309	1.10347	1.0427	0.97561	0.911704	1.07191	0.514286	1.93319	1.59619	1.57937	1.36216	0.847262	1.20046	1.35706	1.7891	1.65761
	1.31798	1.7355	0.875318	1.22666	1.11284	1.20089	1.28634	1.47376	1.06804	1.19958	1.22215	0.772512	1.12795	1.49306	1.35134	0.99295	1.35316	1.58779	1.01966	1.09673	1.51155	0.629505		1.5038	1.23684	0.289176	1.81074	1.29547	1.09953	1.22494	1.37488	1.55316	1.20964	0.499518	1.57282	1.125	0.950704	1.49327	1.04186	0.759124	1.37978	1.47232	0.945385	1.4249	0.330832	0.952471	1.03226	1.0512	1.33211
	0.657061	0.192588	0.481923	0.490545	0.864775	0.693447	0.581053	0.396217	0.851351	0.657237	1.22581	0.91498	0.483627	0.721893	0.758885	0.48696	0.605405	0.701518	0.680036	0.556523	0.577117	0.983448	0.585841	0.58566	0.60918	1.2513	0.739267	0.476139	0.967593	0.521774	0.577646	0.567411	0.391006	0.86619	0.756282	0.846753	1.04258	0.603279	1.01811	0.794613	0.471505	0.477539	0.710476	0.614278	1.0604	0.805526	0.830022	0.652101	0.600413
	0.707326	0.0910628	0.578241	0.996424	1.08115	0.738735	0.877567	0.640562	0.888412	0.796826	1.26785	0.942263	0.526393	0.935875	0.672743	0.606651	0.740331	0.729724	0.92971	0.779133	0.728289	0.53688	0.725	0.826574	0.956897		0.949062	0.508269	1.05356	0.595863	0.876593	0.676337	0.575617	0.36673	0.953524	1.00452	0.942149	0.872146	0.996289	1.07329	0.46261	0.797023	0.795324	0.904861	7.73243	0.627931	0.555198	0.557325	0.454357
	1.32922		0.629042		1.07657	1.06947	1.20249		1.17954	0.801488	0.731602	0.591667		1.69014	0.770107	0.45793		0.786029		0.830877	1.06239		0.88959	0.914349	0.884058		1.07272	0.999198	0.624813	0.982651		0.905693	0.859301	0.889669	0.866009	1.11573	0.973756	1.00471	0.950447	1.45048				0.931208		1.96055	1.64671	1.75
	1.5066	0.80314	0.853259	1.31625	1.39764	0.840145	1.70769	1.629	1.07843	1.06128	1.12017	0.85906	1.43826	1.20758	1.09563	0.685605	1.24198	1.22543	1.09879	1.07927	1.7649	0.652929	1.10274	1.37775	1.33333	0.304194	1.48187	1.04545	1.83333	0.906184	1.23522	1.1739	0.874141	0.698947	1.32946	1.07193	0.972376	1.04403	1.00814	0.764228	1.52941	1.46928	1.21762	1.12049	0.418933	1.07259	1.01632	0.978125	1.22743
	0.699808	0.209068	0.712136	1.07039	0.817121	1.09517	0.630814	0.505543	0.940206	0.813528	0.863978	1.09953	0.72752	0.885417	1.10769	0.418374	0.579926	0.73419	0.874325	0.758916	0.597373	0.89802		0.652308	0.609649	0.793736	0.606484	0.589125	0.534597	0.862521	0.585765	0.702608	0.791244	1.06654	0.718989	0.978448	1.17606	0.704036	0.963721	1.23601	0.455839	0.710796	0.712871	0.77541	0.781747	0.971483	1.04058	1.01205	0.843034
	1.06997	0.892573	0.650009	1.02041	0.778626	1.12537	1.35	1.03441	0.969466	0.884487	0.729167	1.04389	1.1203	0.982898	1.0954	0.524323	0.927083	1.03068	1.08173	0.870196	0.852705	0.731807	0.940063	0.879833	1.13469	0.390902	1.0921	0.875884	1.22992	0.738576	1.0198	0.728532	0.77989	1.0687	0.925663	1.09434	1.05096	0.72253	0.920403	1.52768	1.04384	0.941366	0.96468	1.02516	1.30419	0.895282	0.92883	0.952381	0.959283
	1.42678	0.500739	1.12898	0.695232	1.03343	0.931189	1.53279	0.789082	1.00741	1.13535	0.651139	0.471373	0.642672	1.14286	0.820573	0.974323	0.969359	1.14115	0.84855	1.18328	1.19685	1.34655	0.983389	1.26513	1.2	0.840092	0.802156	1.48087	1.0303	1.02425	1.21001	1.19649	1.16937	1.73502	1.03365	1.01408	0.974299	1.05075	1.04503	0.80597	1.19793	0.885918	1.07372	1.02936	1.84196	1.22704	1.26293	1.54685	0.985423
	0.556444		1.0938		0.886905	0.561297	0.950649		0.857971	0.839537	2.2931	1.90135		0.972199	0.651278	0.946539		0.976341		0.888232	0.810073		1.05229	0.66984	1.21509		0.541986	0.431384	1.02703	0.512931		0.588551	0.53067	0.529412	0.690497	1.08683	1.09447	0.689655	1.12153	0.664945				0.574039		0.207366	0.221713	0.253782
	1.45019	0.926009	0.47445	0.694184	0.729306	0.764639	0.890208	0.536835	0.848485	0.639432	0.633769	0.457985	0.773134	0.858954	0.760928	0.373911	0.810219	0.663003	0.746997	0.696521	1.39465	1.13268	1.18663	0.728278	0.617954	1.34854	0.76683	1.10539	1.10662	1.01312	0.764929	0.885324	0.790577	0.82716	0.802692	0.777528	1.07085	0.903491	1.06999	0.89701	1.04885	0.652079	1.24371	0.897065	1.83093	1.4447	1.40156	1.71529	0.861456
		1.82814		1.1947	1.11962		1.46575	1.61948	0.978622		0.746847	0.670635	1.7367	1.48368			1.04762		1.01164			0.54543	1.16294		0.951389				1.04325		1.22197			2.00772		0.803828	0.936416	1.16461	0.996454	0.786704	1.72024	0.947143			3.36356	0.745182	0.764302	0.926108	1.20166
	1.42882		0.868896		1.21842	0.927618	1.04509		0.981168	1.03892	0.945882	0.74359		1.16912	0.694042	0.723555		1.28512		1.07638	1.58427		0.62908	1.30252	1.07097		1.55401	1.20233	1.1938	1.1411		1.2579	1.23912	1.04348	1.14105	1.19527	0.971109	1.08626	0.982172	0.858065				1.14192		0.830396	1.01256	1.03502
	1.52628	0.143862	0.516859	1.39422	1.15599	1.10283	1.05361	1.10779	0.857143	0.8685	0.566087	0.515044	1.6555	1.11111	0.860415	0.419992	1.46296	0.864174	1.16477	0.826219	1.12353	0.752572	0.753165	1.07901	1.22599	0.358313	1.15031	1.05432	1.23077	0.884722	1.14217	1.01057	0.856901	1.447	1.09147	1.19107	0.969484	1.05882	0.961357	1.45566	1.26176	1.24521	1.03254	1.0405	0.441176	1.16385	1.25894	1.31241	1.2757
	2.18443	0.166767	0.81827	1.47893	1.28691	0.765356	1.37995	1.53925	0.931677	1.16529	0.518261	0.581711	1.47667	1.14504	1.09694	0.64208	1.22222	1.22781	0.95661	1.12199	1.95307	0.776193	0.835443	1.40164	1.42373	0.241376	1.49179	1.25402	1.07962	1.17873	1.28906	1.14283	1.30097	0.733641	1.30632	1.16625	0.953052	1.05322	1.02356	0.746177	1.59354	1.32999	1.12516	1.17365	0.796324	1.06653	1.21777	1.17489	0.986215
	0.751948	0.472312	0.485207	0.936881	0.555626	0.498503	1.10698	0.781919	0.783162	0.684874	0.942172	0.801755	0.509617	0.898485	0.482851	0.391946	0.956499	0.412174	0.986282	0.624536	0.512438	1.37854	0.740294	0.524567	1.08355	0.966136	0.41443	0.480701	1.26482	0.515266	0.998102	0.514377	0.499452	1.37886	0.679309	1.0396	1.1804	0.624109	1.0354	0.980208	0.751909	0.914586	0.726127	0.46225	1.44381	0.798892	0.807481	0.806174	0.998627
	1.49075		0.991364		1.05	1.70759	0.732095		0.981168	1.06095	0.536471	0.903846		0.367736	1.49788	0.595485		1.16108		1.02348	1.41238		0.884273	1.11412	1.2043		1.134	1.46516	0.620155	1.20115		1.12611	1.13007	0.478882	1.05976	1.11243	1.01212	0.929712	0.95624	1.85161				1.29068		1.15198	1.44734	2.25292
	0.878462	0.153009	0.910291	0.772953	0.78511	0.544927	0.76129	0.423852	0.923077	0.861116	1.7288	1.94611	0.606293	0.79646	0.468565	0.757987	0.61244	0.513068	0.849904	0.799594	0.773297	1.14595	0.586909	0.607905	0.765714	1.1917	0.542949	0.486433	0.9312	0.638598	0.738113	0.599938	0.714518	1.25688	0.725261	1.02088	1.19617	0.784314	1.02268	0.908537	0.61245	0.664892	1.21324	0.615492	0.546093	0.534351	0.579111	0.435644	0.629743
	0.806484	0.227443	0.325493	0.515913	0.67658	0.568612	0.669856	0.605481	0.741627	0.512365	0.746364	0.557895	0.884989	0.676	0.467914	0.272712	0.916981	0.561672	0.57998	0.495221	0.729869	0.3642	0.75641	0.594887	0.947189	0.244803	0.743257	0.620249	0.516971	0.618639	0.561347	0.670278	0.612137	0.612876	0.73476	0.77951	0.981308	1.05039	1.00362	0.664879	0.889446	0.634872	0.609128	0.650848	0.556791	0.958333	0.97351	0.776758	0.581407
	1.38917	0.102767	0.711521	1.22279	1.15371	0.677823	1.035	1.17972	1.09388	0.982029	0.907631	0.798762	1.13311	1.26427	0.622821	0.743911	1.17442	0.959166	0.833793	1.04147	1.49805	0.677114	0.647482	1.16495	0.997792	0.346116	1.30096	0.889303	1.16333	0.931991	1.3447	1.07647	1.17887	1.16541	1.00464	1.17108	1.01928	1.1875	1.06476	0.693498	1.41801	1.15968	1.10123	0.964495	0.778626	0.867102	0.945285	0.742958	0.862265
	1.12564	0.334455	0.602376	1.51855	0.992126	0.876652	1.40769	1.97183	0.857843	0.762748	0.496723	0.316779	1.24806	1.8311	0.890887	0.449951	1.07289	0.979776	1.06533	0.720494	1.03237	1.14749	1.11644	0.971623	0.423892	0.201547	1.12989	1.06424	0.884615	0.797174	1.4481	0.788328	0.726564	0.919298	0.997255	0.969838	0.844199	1.06918	0.953846	1.21951	1.20604	1.32643	0.978677	1.06756	1.19168	1.22427	0.191142	1.22188	1.17289
	0.853065	0.917328	0.683372	1.14693	0.979798	0.917491	1.10313	0.838498	0.94433	0.920475	1.76108	1.88969	1.21448	1.0452	1.22732	0.58303	1.74593	1.02342	1.06654	0.851893	1.22779	0.891959	0.885185	0.967445	1.02316	0.327023	1.18924	0.629316	1.48598	0.807577	0.967844	0.897918	0.871279	0.824427	1.14896	1.03736	0.965269	1.35514	0.995392	0.938875	0.960798	1.1674	1.10078	0.938525	0.734434	0.27552	0.243697	0.267208	1.01283
	0.299157		1.49752		0.701714	0.524769	1.14642		1.41625	0.794308	1.10823	1.54167		1.21127	0.472273	2.46938		0.583267		0.859685	0.345148		0.914826	0.455686	0.12657		0.332446	0.391416	1.13602	0.662215		0.610023	0.817694	1.70512	0.60074	1.30564	1.10769	0.797488	0.999188	0.875399				0.548107		1.01972	0.552395	0.552632
	0.930324	1.4173	0.959816	0.815433	1.29787	0.941379	0.712	0.767472	1.04211	1.1204	1.33058	1.4818	0.745793	0.857464	1.1971	0.782644	1.01422	1.09267	1.09304	1.03895	1.23601	0.693802	1.18182	1.19669	0.898799		1.21051	0.942663	0.783871	0.975644	0.953729	1.16361	1.08386	0.627976	1.23051	1.0567	1	1.14465	0.963426	0.670807	0.715978	0.974231	1.07506	1.07376	0.727902	0.370217	0.348993	0.377358	0.90157
	0.173573	4.32809	1.21678	0.330042	0.575261	0.473562	0.74619	0.384104	0.946695	0.45472	1.96466	1.57944	0.298701	0.324575	0.270738	1.54585	0.450116	0.751555	0.448372	0.454716	0.252556	1.3745	1.15079	0.264435	0.388262	3.551	0.335459	0.295584	0.661053	0.455063	0.362784	0.474375	0.497365	0.888579	0.530319	0.901709	1.24853	0.571429	1.05671	0.883495		0.475159	0.481649	0.464126	0.380704	0.48583	0.509091	0.325938	0.715586
	1.93412		0.83561		1.01053	1.13167	1.12467		0.676083	0.813253	0.545882	0.542949		1.19514	0.685115	0.528042		0.8162		0.844733	1.09629		0.94362	1.10317	0.847312		1.07745	2.57782	0.894057	1.51135		1.15721	1.40331	0.410559	0.867607	0.970414	1.07549	0.939297	0.951378	1.62581				1.14395		2.95154	3.82609	4.55253
	1.5064	0.219813	0.675733	1.0154	1.21884	1.42902	1.16393	0.807382	1.23704	1.1737	0.753418	0.708235	1.23822	1.36883	1.19552	0.488211	0.97493	1.32945	0.980233	1.16191	1.50461	0.820541	0.730897	1.23445	1	0.554135	1.25623	1.20586	0.965035	1.25009	1.23358	1.20832	1.11444	1.5694	1.16755	0.798122	0.759346	0.877612	1	0.335522	1.11438	1.06408	1.00105	1.24862	0.53986	1.06155	1.09698	1.29813	0.838156
	1.237	0.154408	0.760453	1.16843	0.862876	0.882462	1.28219	1.46905	0.990548	0.969982	0.907563	1.06667	1.20795	0.904955	1.06857	0.502159	0.715789	0.975529	1.36102	1.02897	1.08275	0.977011	0.824798	1.09104	1.25	0.285327	1.06733	1.13213	1.35569	0.935346	1.08254	1.10832	1.00943	1.25234	1.05434	1.27761	0.97048	1.0356	0.992689	0.703364	1.1057	1.21372	1.16716	0.876546	0.841649	0.998158	1.86473	1.30447	1.03235
	1.69239	0.291388	0.656708	1.27181	1.27023	1.23635	1.1745	1.09297	0.98829	0.86453	1.11894	0.823529	1.33237	1.33264	1.0527	0.411874	1.40667	1.12198	1.49511	0.893487	1.03799	0.743035	1.03207	1.20516	1.19203		1.46747	0.987852	0.776398	0.90329	1.3438	1.08391	0.939904	0.994709	1.16374	0.989059	1.03981	1.09057	1.04475	1.27568	1.54413	0.975973	1.19117	1.16839	0.418695	1.05894	1.09938	1.32722	1.03442
	0.729849	0.261748	0.646752	1.23239	0.855446	0.925628	0.900552	0.938539	1.09048	1.08077	0.808081	0.786957	0.732884	1.33776	1.44068	0.713035	0.782383	1.02111	0.97882	1.05031	0.951425	0.751337	0.893617	0.972336	0.912338	0.586589	1.06236	0.834036	1.27708	0.962404	1.11519	1.01541	1.07591	0.831081	1.25964	1.07268	0.965438	1.21798	1.03467	1.02367	0.79035	0.953483	0.915684	1.03497	1.60783	0.505607	0.586207	0.704641	0.877959
	0.932741		1.32272		0.875	0.455196	0.857143		0.8	0.900374	1.02931	1.13004		0.95535	0.335154	0.634957		0.690153		0.888561	0.890003		0.712418	0.626924	0.973585		0.453796	0.666802	1.07722	0.596953		0.630034	0.619741	0.948686	0.655609	1.13165	1.14055	0.781609	1.11388	0.546125				0.507181		1.0067	0.998794	1.07899
	0.980215	0.971098	0.80396	0.980346	1.01523	0.647409	1.49677	0.994897	0.876254	0.876133	1.44787	0.97006	0.516156	1.19961	0.804944	0.708859	0.803828	1.05733	0.922347	0.877879	1.08914	1.02113	0.952727	1.00217	1.38286	0.511086	1.03408	0.682851	0.9792	0.62597	1.54775	0.807127	0.748567	1.01835	0.981768	0.895592	1.21053	0.969188	1.0983	0.926829	1.08032	1.06669	0.703272	0.724618	1.08341	0.625954	0.514995	0.500707	1.1372
	1.0778	0.226826	0.548368	1.19978	0.874189	0.766682	1.11047	1.02168	0.91134	0.797153	0.712235	0.549763	0.555284	1.27083	1.00544	0.551113	0.914498	0.917928	0.878708	0.661219	1.01993	0.881188		0.970325	1.08333	0.315934	1.07527	0.743379	0.803791	0.734238	1.18207	0.825621	0.841381	0.447445	0.948485	0.905172	0.957746	0.874439	1.01209	1.10462	0.837586	0.996961	0.763334	1.00356	0.529571	0.948669	1.08429	1.01506	0.703604
	1.42334	0.0855429	0.709597	0.850345	1.02273	0.80229	0.935622	0.867516	0.778523	0.948918	0.760606	0.89916	1.46853	1.06402	0.736748	0.521105	1.08364	1.27746	1.06853	1.01106	1.36966	0.791745	0.766234	1.20262	1.08	0.273067	1.42184	1.02859	0.904943	1.00442	1.00412	1.05997	0.772114	0.724185	1.03474	1.0089	0.958042	1.21472	1.08301	0.886076	1.41037	0.992695	0.663553	1.04622	0.582897	1.09283	1.1573	1.17966	0.835559
		0.219232		1.35661	1.13249		1.17431	1.28545	0.986577		0.59897	0.75426	1.59371	1.20863			0.964497		1.17596			0.812137	0.910448		1.28736	0.300655			1.10071		1.31092			1.33333		1.3121	0.919149	1.13115	0.907579	1.27126	1.69651	1.22334	1.54526		2.11737	1.06223	1.22782	1.44922	0.981149
		2.08854		1.31978	1.03786		1.7148	1.56709	1.02655		0.789216	0.511628	1.88155	1.60121			1.08734		1.04305			0.594648	1.22581		1.16667	0.147385			0.990977		1.33165			1.72028		0.238636	0.971429	1.33172	1.25028	0.684366	1.77968	1.478	1.1714		0.61496	1.10393	1.51741	1.43601	1.27703
	0.728064	1.07722	0.946652	0.674154	0.914046	0.541171	0.540084	0.550679	0.693182	1.02155	1.18231	0.997904	0.330291	0.668224	0.572366	0.736478	0.867021	0.886237	0.930477	1.00447	0.766266	1.09917	0.911392	0.826651	0.291603	1.09316	0.413598	0.67214	0.768201	0.754817	0.64887	0.665698	0.756235	0.837885	0.601509	0.874725	1.20682	0.73617	0.991928	0.61083	0.600541	0.63221	0.855042	0.556198	0.543558	0.893204	0.682379	0.59589	0.775701
	0.853712		0.600437			0.70087				0.871591					0.469327	0.533897		0.68005		0.840793	0.934358			0.833902			0.597838	0.480727		0.768751		0.744542	0.685197		0.782984									0.704002
	0.627699	0.720843	0.76045	0.863474	0.582064	0.54621	0.76129	0.396992	0.889632	0.729607	1.19935	1.77844	0.437075	0.566372	0.737955	0.928423	0.583732	0.53685	0.599013	0.709019	0.666487	1.23604	0.785455	0.555957	0.267429	2.46555	0.515719	0.638527	0.9664	0.811613	0.523847	0.637177	0.860467	0.719266	0.567333	1.03944	1.13636	0.728291	1.0586	0.658537	0.389558	0.446881	0.871004	0.604572	1.68745	1.01718	0.949328	0.701556	0.890583
	1.86411	0.294643	0.715608	1.30446	1.09579	1.31983	1.50579	1.38779	1.2381	1.37951	0.748634	1.12248	1.84401	1.67677	1.21197	0.418857	1.05556	1.71587	1.42518	1.32144	1.71094	0.835432	1.00787	1.75433	1.59911	0.427999	2.47653		0.967742	1.40257	1.61295	1.7091	1.33912	1.60577	1.41496	1.17168	0.858896	1.25	1.03757	0.814286	1.21283	1.25373	1.26842	1.36667	2.475	1.12209	1.33803	1.45961	0.899816
	1.2059	1.77973	0.815153	1.31317	1.14711	1.12434	1.18939	1.59072	1.02506	0.988885	0.917558	0.953608	1.3775	0.900662	1.83941	0.683639	1.60521	1.18676	1.20305	1.05773	1.49631	0.942672	1.14356	1.232	1.26499	0.26968	1.35271	1.00622	1.25607	1.07839	1.41175	1.26087	0.887746	1.10266	1.20739	0.850356	1.02088	1.15718	1.02052	0.833787	1.08065	1.46371	1.31263	1.27619	2.11226	0.754793	0.668108	0.695906	1.25715
		0.159398		0.72075	0.869767		0.805858	0.491022	1.0252		1.18268	1.13381		1.02116			0.637255		0.960314			1.07599	0.939113		1.39501	1.31382			0.661509		0.657347			1.13712		1.06236	1.04974	1.4186	0.843155	2.62069	0.577635	0.591875	0.876404		0.571877	1.63674	1.69666	1.41958	0.826843
		0.200103		1.10591	0.813953		1.39749	1.27404	0.889764		0.730729	0.647482	1.43111	1.10847			1.05882		1.10629			0.795611	0.993668		1.52183	0.362929			1.38491		1.31439			0.913521		1.1416	0.971429	1	1.01541	1.14943	1.74899	1.19204	1.05158		0.670856	1.22756	1.3419	1.32168	0.880011
	1.35128	0.796605	1.01504	1.22478	1.02149	1.19973	1.22727	1.98661	0.952164	1.13893	0.820642	0.793814	1.32011	1.55795	1.44712	0.868515	1.36685	1.43048	1.07301	1.11645	1.40556	1.04311	1.01485	1.37549	0.88588	0.341525	1.76705	1.21546	0.923364	1.20152	1.44737	1.42316	1.2623	1.20913	1.37527	1.02613	0.979118	1.33941	0.970562	0.768392	1.36864	1.30307	0.996273	1.37889	0.692913	1.00908	1.08324	0.991228	1.17435
		0.233131		1.15987	0.976378		1.43885	1.14427	0.875		0.424757	0.432203	1.08331	1.25736			1.15615		0.924499			0.676166	0.792889		1.31361	0.266797			1.18577		1.02566			0.776471		1.53957	0.924025	1.26549	1.02703	0.925	1.48804	1.16173	0.745604		1.26614	2.08808	2.36095	2.37143	0.884198
	0.272034	1.37113	1.21648	0.361137	0.963115	0.544912	0.518182	0.368897	0.773481	0.605484	1.21229	1.13021	0.364456	0.390593	0.563531	2.33679	0.37619	0.553664	0.547213	0.609411	0.268636	1.2155	0.66055	0.367063	0.689189	2.90766	0.306645	0.596014	0.674757	0.700868	0.356501	0.627142	0.938119	0.240708	0.541225	1.19216	1.20978	0.585567	0.978918	0.869301		0.323884	0.411749	0.53086	0.68314	0.605578	0.531034	0.9801	0.635276
	1.86063	0.150401	0.542028	1.17084	1.22034	0.722974	1.21212	1.10906	1.02301	1.34881	0.593315	0.690691	1.16564	1.10765	0.69711	0.522811	1.17431	1.23228	0.901069	1.44238	1.58828	0.76608	0.769811	1.51589	1.54817	0.277143	1.23327		1.40943	1.24667	1.04502	1.16235	1.20197	0.789166	1.11904	1.47796	0.933466	0.943396	0.950937	0.707246	1.51682	1.00854	0.877432	1.17387	1.32267	1.5403	1.80851	1.63148	0.824869
		0.1915		1.0846	0.96063		1.28777	1.11424	1.02667		1.24757	1.07345	1.22466	1.06018			0.983389		1.00687			0.865527	0.820444		1.3787	0.416923			1.083		1.11881			0.725792		1.97842	0.87269	1.18584	0.98018	0.891667	1.13611	1.07611	0.929001		2.44621	1.1399	1.12426	1.28571	1.01753
	1.08478	0.907985	0.674644	0.641554	1.03061	0.505833	1.16721	0.831693	0.679426	0.687999	1.38049	0.865342	0.468777	0.97868	0.380165	0.786173	0.907975	0.780714	0.765746	0.638709	0.899766	0.939138	1.17722	0.771611	1.03285	0.339388	0.654487	0.865088	0.825257	0.735918	1.01268	0.727749	0.722718	0.513191	0.645012	0.873449	1.09032	0.986784	0.979446	1.5082	1.5195	0.86594	0.706382	0.641261	1.99642	1.19413	1.34129	1.31658	0.880652
		3.72362		0.287703	0.655814		0.490377	0.280584	1.25354		1.83105	1.77554	0.715553	0.280423			0.529412		0.332828			1.06922	0.887482		0.413721	3.4922			0.998066		0.431855			0.59914		1.13426	1.14286	0.505426	1.01723	0.896552		0.355274	0.439734		6.90338	1.10647	0.915167	0.741259	0.65153
	1.28646	1.22028	0.885483	1.15718	0.596939	1.02475	1.02951	1.51857	0.913876	1.03641	2.04221	2.46358	1.05857	1.28122	1.2405	1.00051	1.6319	1.28527	0.975814	1.04061	1.14167	0.767824	0.924051	1.40708	0.241606	0.219913	1.47514	1.1555	1.26872	1.09911	1.13855	1.16227	1.06252	1.08936	1.31299	0.808933	1.17301	0.559471	0.968722	1.2459	1.27183	1.36905	1.0388	1.14867	2.16915	0.410835	0.353222	0.296817	1.13625
	1.37653		0.621702		1.16343	1.38259	1.09034		1.14544	1.14466	0.418615	0.56369		1.34648	1.1704	0.600978		1.26575		1.21507	1.61046		0.895899	1.3236	1.50725		1.54875	1.55713	0.765321	1.43986		1.4548	0.979744	0.962889	1.35472	0.961424	0.955656	1.13658	0.979691	1.07987				1.55335		0.873767	1.25898	1.2
	1.20049	0.184461	0.705591	1.11715	0.735878	0.798176	1.09213	1.23373	0.873065	0.95941	1.60823	0.822749	1.30205	0.87343	1.05984	0.433278	0.851064	0.889335	1.35711	0.918023	1.10803	0.761305	0.846667	0.956589	1.13208		1.01909	1.02473	1.26019	0.878587	0.987801	1.09083	0.821023	1.07652	1.00063	1.1922	1.05669	0.985075	0.832707	0.488087	0.829389	1.12851	1.30809	0.849975	1.20237	1.14815	1.10391	1.10749	0.862205
	0.687249	1.90206	1.28077	0.776467	1.11962	0.864202	0.533562	1.11549	0.969121	1.1024	1.31532	1.85714	1.24263	0.702275	1.05211	0.800386	1.19643	0.864813	1.00241	1.19434	1.04851	1.18758	1.00958	1.03506	1.07292		0.890632	0.808252	0.846658	0.86616	0.949052	0.958731	1.18591	0.701416	0.912667	0.976077	0.968786	1.18519	0.964539	0.731302	0.89221	0.78963		0.823282	1.11356	0.51606	0.455378	0.522167	0.85607
	2.0951	0.148522	0.65641	1.7919	1.19551	1.19331	1.82477	1.92406	1.00654	0.858885	0.482089	0.277323	2.08579	1.40238	1.13404	0.555939	1.15228	1.069	1.32315	0.89557	1.53269	1.25599	0.964263	1.38767	1.39464	0.312707	1.44631	1.63223	1.38745	1.10944	1.46088	1.30915	1.02796	1.56419	1.21951	1.2228	0.932262	1.03093	0.990654	1.4007	1.71068	1.57945	1.16772	1.24441	18.2109	1.1598	1.24818	1.66139	1.37899
	1.53045	0.170057	0.921859	1.15733	0.752475	1.2854	1.3913	1.33447	1.08039	1.22573	0.952381	0.432047	1.53774	1.18914	1.44959	0.674791	1.14488	1.10593	1.06061	1.3256	1.79747	1.00316	1.06625	1.35354	1.15021	0.419008	1.53009	1.57177	1.37853	1.40039	1.49551	1.56649	1.14235	0.8	1.17329	1.42618	0.946163	1.23735	0.949955	1.016	1.77082	1.2814	1.22017	1.28322	1.65921	1.3288	1.39729	1.61303	1.24926
	0.544729	0.549968	0.831821	1.00408	0.818182	0.484505	1.00779	0.563481	0.89313	0.720753	1.54545	1.5137	0.457694	0.633333	0.553132	1.12178	1.30769	0.720789	0.58482	0.664518	0.448762	1.12925	0.668421	0.47636	1.27273	0.573678	0.378541	0.38341	1.0785	0.488363	0.900056	0.520927	0.778043	0.563704	0.596504	1.64238	1.22195	0.870588	0.866727	0.456727	1.03507	0.96043	1.0119	0.407772	2.3575	0.416157	0.5	0.490872	0.754422
	0.489957	1.04433	0.693387	0.512515	0.743421	0.354003	1.07907	0.50427	0.872881	0.58421	1.09925	1.43511	0.299135	0.674835	0.333506	0.723308	0.64214	0.628018	0.617309	0.587963	0.509685	1.29954	1.10268	0.389501	0.929766	1.08059	0.345707	0.299679	0.66717	0.352564	0.796227	0.366223	0.338824	0.640329	0.529848	0.880383	0.810036	0.531629	0.993464	0.578218	1.12573	0.676201	0.784788	0.364037	1.886	0.281967	0.342135	0.288194	0.899591
	0.894078	0.718286	0.947396	0.922576	0.772894	0.439796	1.29489	1.11166	0.949153	0.76026	1.35438	0.976923	0.504519	1.12755	0.335378	0.748203	0.99422	0.571067	0.809498	0.806949	0.804104	1.35939	0.875442	0.566478	0.953947	0.630147	0.337913	0.57127	1.00344	0.588394	1.13041	0.551671	0.597636	0.585253	0.579472	1.25547	1.03704	0.636086	1.07834	0.563303	1.11219	0.906347	1.04085	0.488243	0.351208	0.960086	1.02137	0.8832	0.933002
	0.841424	0.198926	0.816161	0.96448	0.908277	0.764371	0.724036	0.557591	0.946387	0.812286	1.54578	1.44472	0.588548	0.812995	0.849298	0.564153	0.781022	0.654078	0.867729	0.799429	0.563462	1.09576	0.522006	0.72295	0.872651	0.911493	0.698353	0.534485	1.12132	0.589375	0.921172	0.691001	0.539054	0.95679	0.699408	1.01573	1.16376	0.928131	1.09108	1.66777	0.801765	0.755072	0.886916	0.685007	0.705091	0.638249	0.498331	0.558875	0.510791
	1.39159	0.20847	0.362818	0.971571	1.2807	0.982214	1.23894	0.850772	0.965517	0.944078	0.771214	0.564931	1.15184	1.29555	0.825852	0.379843	1.10811	0.959666	1.08252	0.923141	2.01071	0.739372	0.742798	1.06998	1.24615	0.215388	1.37179	1.03839	1.30769	0.931116	1.19916	1.0175	0.837507	0.701342	1.06932	1.24623	0.977881	1.14286	0.988679	1.15457	1.37979	1.02686	0.961517	1.04081	13.4327	1.08413	1.12809	1.16327	0.845354
	0.186466	1.58231	0.940046	0.362827		0.446288	0.614958	0.289014		0.510426			0.320899	0.381514	0.268423	2.18707	0.372603	0.595726	0.562475	0.465606	0.205968	1.34559	0.705882	0.2734		3.52488	0.276635	0.310235	0.600768	0.505414	0.330624	0.466131	0.420363	0.297738	0.398529							0.347048	0.450367	0.525347	0.583633				0.7117
	1.07781	0.47524	0.561878	0.56948	0.835644	0.485239	1.12707	0.547734	0.733333	0.771752	0.326599	0.286957	0.517559	1.03985	0.438689	0.698545	0.963731	0.6376	0.800776	0.704932	1.15219	1.082	0.81459	0.747518	0.707792	0.52718	0.457151	1.50631	0.848347	0.836243	0.861689	0.930271	0.794564	0.541892	0.845263	0.766917	1.09908	0.575281	0.983577	0.295266	0.852593	0.680416	0.897988	0.725662	0.97814	1.25994	1.28276	1.73418	0.719876
	0.281391	2.32076	2.00866	0.368683	0.710112	0.699154	0.436565	0.343552	1.25581	0.748568	1.13706	1.13778	0.201967	0.373648	0.600214	3.85181	0.531507	1.01188	0.410595	0.767513	0.40983	1.25859	0.952381	0.415767	0.223695	3.03862	0.366237	0.457134	0.639155	0.687679	0.370345	0.662201	0.572096	0.646154	0.676306	0.577465	1.34571	0.472973	1.134	0.706294		0.423986	0.433164	0.69359	0.545863	0.237327	0.439752	0.278004	0.832319
	1.32601	1.11128	0.858157	1.07109	1.20221	0.856855	0.906516	1.14312	0.944186	0.946812	1.18837	1.16701	1.4357	0.911824	1.05632	0.610265	1.17201	1.01369	0.81616	0.920451	1.20884	0.715894	0.784211	1.2653	1.31175	0.16828	1.33575	0.884584	0.889126	0.863893	0.825889	1.01073	0.681507	0.647782	1.21864	1.34225	0.937788	1.0289	1.02569	0.831325	1.1535	1.25959	0.946243	1.0444	1.04817	1.02938	1.01952	0.917722	1.00008
	1.25314		0.681752		0.893532	1.12491			0.93383	0.89939	1.28261	0.888158			1.18611	0.530006		0.998654		0.807531	0.765089		0.986667	0.923286	1.03175		1.12824	0.88362	1.18896	0.808436		0.788244	1.03603	1.11922	0.887426	1.12392	1.00187	0.930016	0.945749	1.45455				1.01791		0.831261	0.892996	0.946996
	1.05083	2.28581	0.788712	1.08971	1.15613	1.09105	1.15789	1.25819	1.1244	1.10644	1.58182	1.2	1.23293	1.434	1.39923	0.807995	1.50566	1.25375	0.985557	1.13588	1.09063	0.74546	1.07051	1.27539	1.19932	0.420158	1.37517	0.953846	1.10009	0.99598	1.21091	1.22581	1.17452	0.918455	1.34625	1.06459	0.974299	1.28295	1.03623	0.863271	1.33274	1.30574	0.975159	1.1748	1.01595	0.396825	0.450331	0.461774	1.18948
	1.41056	0.593341	0.736063	1.0605	1.25957	0.937797	1.21455	0.963347	1.01579	0.861252	0.719835	0.599572	1.38282	1.09764	0.879196	0.593246	0.876777	0.983897	0.939138	0.908899	1.47647	0.710015	1.03788	1.23152	1.07719		1.48024	1.01202	1.34194	0.884674	0.840629	1.15044	0.805751	0.775298	1.1875	1.10825	0.901316	1.06499	1.00803	0.782609	0.993073	1.2655	1.5177	1.14041	1.84445	1.10858	1.16555	1.1012	0.844074
	0.705564	0.195411	0.735756	0.725007	0.91623	1.00722	1.09202	0.652174	0.948498	0.842404	1.99083	2.56813	0.793255	0.97747	0.878667	0.521883	0.690608	0.907065	1.08725	0.870515	0.680651	0.971164	1.35	0.795545	0.724138	0.996492	1.06501	0.588639	1.05356	0.852568	0.922489	0.753789	0.679699	1.18526	0.980442	0.877828	1.03188	1.09132	0.953618	1.08274	1.0274	0.771867	1.05042	0.880431	0.677288	0.307849	0.325831	0.270382	0.955581
	1.60495	0.48337	0.589136	0.909314	1.08848	1.04022	1.18596	0.911111	0.797297	0.848606	0.295933	0.309312	0.894207	1.07692	0.84168	0.549449	1.2	0.665892	0.874671	0.745686	1.12032	1.14678	0.627434	0.927623	1.06885	0.646595	0.550785	1.33627	1.12963	0.933974	1.13893	0.913838	0.871949	0.88049	0.878657	1.09091	1.09551	0.681967	0.939943	1.45455	1.57428	0.842725	0.782095	0.974969	1.21253	1.25824	1.31788	1.6437	0.894773
	0.645401	1.24555	0.740666	0.964412	0.966912	0.767586	0.583569	0.599315	0.930233	0.836183	1.32188	0.94433	0.462165	0.723447	1.03793	0.761839	0.804665	0.784904	0.75273	0.843115	0.563475	1.04313	0.573684	0.803887	1.20273	0.730711	0.645147	0.583226	0.776119	0.655902	0.850505	0.76401	0.786854	0.815607	0.798815	1.02139	1.03226	0.83237	1.031	1.10241	0.78247	0.812095	0.876879	0.721886	1.29948	0.452666	0.507463	0.702532	0.664403
	0.204885	2.75409	0.86937	0.270149	0.538827	0.477603	0.490637	0.331143	1.06299	0.587282	1.97354	2.42308	0.227798	0.25122	0.231334	1.67861	0.335821	0.452802	0.344002	0.593951	0.177371	1.06506	0.815385	0.251589	0.255346	3.58101	0.254	0.242868	0.506667	0.505171	0.428738	0.44625	0.52945	0.332239	0.491601	0.979866	1.31435	0.460843	1.05107	0.899023	0.0376266	0.327467	0.390293	0.375944	1.02857	0.54954	0.449561	0.31677	0.487929
	1.27869	0.227814	0.756294	1.02103	0.903553	1.15303	1.48387	1.27424	1.13043	0.885392	0.78336	0.610778	1.02211	1.11898	1.17464	0.686928	0.966507	1.08924	1.25831	0.835882	1.07647	0.784603	0.989091	1.06205	0.651429	0.488141	1.20852	1.13017	1.1168	0.81454	1.26618	0.926275	0.836513	0.981651	0.882937	1.01624	1.08373	0.745098	1.01323	1.34146	1.2761	0.997125	0.74953	1.1207	0.653205	1.04962	1.04654	1.06931	0.966125
	2.55105	0.127168	0.859692	1.16283	1.10321	0.940241	1.14839	1.35214	1.0301	1.00445	0.353323	0.12994	1.49575	1.3648	1.05678	0.700052	1.11005	1.12326	1.35457	0.945713	2.17964	0.581818	0.8	1.5816	1.30286	0.284848	1.62934	2.43075	0.944	1.37429	1.36103	1.62241	1.43417	1.3211	1.18823	1.35499	0.976077	0.862745	0.952741	1.12195	1.999	1.14648	0.774351	1.35099	0.962248	1.05153	1.16029	1.55587	0.994241
	1.66107	0.208961	0.742432	1.34793	1.20891	1.46382	1.63636	1.73333	0.89441	1.03797	0.921739	0.778761	1.79007	1.67939	1.31214	0.653634	1.16667	1.49358	1.10977	1.02493	1.40824	0.923761	1.12658	1.05589	1.38418	0.287579	1.45915	1.34194	1.59514	1.12044	1.45134	1.08946	1.07458	1.54839	1.32266	1.11663	0.985915	1.09804	0.936852	2	1.67469	1.23522	1.61202	1.14118	1.12353	1.1281	1.22644	1.26457	1.3715
		1.94695		0.51872	0.459364		0.526935	0.408538	0.892683		1.76471	2.09544	0.275025	0.307373			0.401254		0.35575			1.32293	0.918567		0.174499				0.719818		0.378408			0.428424		0.952381	1.40191	0.452381	1.09751	0.674095	0.0658343	0.280311			0.932031	0.391775	0.303241	0.238095	0.960682
		0.166561		0.815632	0.935665		0.781149	0.765669	1.00508		0.982557	1.02486	0.956265	0.995586			0.833826		0.863104			0.895356	0.861605		1.18115	0.723617			0.660077		0.864636			0.770193		1.118	0.979884	0.989302	0.967474	0.87784	1.08653	0.754272	0.942514		0.901566	0.544885	0.486436	0.545514	0.633753
	1.35033	0.323671	0.478943	1.15307	1.03403	0.991088	1.39468	1.37213	0.922747	0.896784	0.586771	0.39261	1.19135	0.928943	1.29678	0.422319	1.1989	0.861044	1.10927	0.773702	2.03156	0.353245	1.43	1.15572	1.25862		1.30367	1.21503	1.16769	1.16151	0.768426	1.2755	1.09299	0.616257	1.19636	1.21267	0.880756	1.24658	1.02041	0.567376	1.65072	1.34561	1.11827	1.24036	0.688317	1.19062	1.23473	1.3535	0.962356
	1.32221	0.29619	0.861928	0.802249	0.971875	1.43173	0.998192	0.81656	0.965278	1.12441	0.737363	0.820144	1.2429	1.62671	1.06104	0.529819	0.916256	0.928806	1.20282	1.08812	1.00152	1.00667	1.07634	1.20362	1.35361	1.00778	1.48454	1.27073	1.14765	1.04357	1.0803	1.07307	0.92894	1.1065	1.10642	1.02674	1.00561	0.966216	0.928105	1.08667	1.20527	0.810696	1.04675	1.14671	1.09002	1.20484	1.22107	1.54403	1.11216
		0.150019		0.902629	0.753173		0.620183	0.448762	1.1619		1.12748	1.55776	0.69282	0.758065			0.600791		0.798469			1.07844	1.05783		0.780142	1.6245			0.926829		0.659599			1.21136		1.05956	1.129	0.483168	0.957721	2.12853	0.318318	0.611975	0.711363		0.746709	0.644958	0.583691	0.463679	0.610262
	0.162845	4.38205	1.10515	0.409359	0.650307	0.466336	0.577622	0.417011	1.04388	0.474342	1.7094	1.47889	0.305163	0.383459	0.317748	1.36869	0.433213	0.558216	0.469729	0.541294	0.345846	1.113	1.22599	0.278522	0.397237	3.53747	0.351231	0.35552	1.12184	0.553575	0.424846	0.499732	0.697629	1.05833	0.47876	0.817978	1.2605	0.56167	1.0341	0.94359	0.149723	0.528276	0.501935	0.49697	4.41964	0.464722	0.419453	0.269405	0.733006
	0.276025	0.572804	1.07522	0.459845	0.610837	0.823588	0.517343	0.36567	0.982885	0.74518	2.47643	2.67556	0.402403	0.629213	0.461118	1.30143	0.52505	0.794576	0.755151	0.738614	0.284687	0.848953	0.819876	0.427366	0.592179	1.70826	0.678875	0.267552	0.645833	0.640907	0.510286	0.521556	0.648666	0.774231	0.683106	0.871921	1.21844	0.668067	0.911091	1.45658	0.422553	0.492911	0.542013	0.656399	1.1475	0.230692	0.191574	0.110567	0.685711
	1.63508	0.132966	0.768472	1.07419	0.850746	0.798171	0.897059		0.941538	0.930007	0.742364	0.535907	0.84106	1.75074	0.82033	0.583149	0.786408	1.13954	0.854851	1.01818	1.32375	0.871424	0.500461	1.23352	1.36327	0.374776	1.16012	1.20938	1.20729	0.88237	1.24234	1.06345	1.07902	1.09058	0.905139	1.1117	0.954913	0.964789	1.0826	0.815603	1.55102	0.984356	0.771896	0.922157	1.43794	1.26695	1.35601	1.60406	0.74903
	1.32626	0.096475	0.918475	1.13025	1	0.93815	1.08446	1.15956	1.01186	1.11247	0.668342	0.571592	1.87923	1.103	1.1128	0.626036	1.3375	1.25432	1.09254	1.15555	1.52935	0.801593	0.902834	1.25995	0.976	0.389494	1.45235	1.29359		1.0966	1.19064	1.20565	1.08109	0.895161	1.2523	1.125	1.25059	1.06757	1.16185	0.8	1.94808	1.32713	1.06225	1.08917	1.02934	1.06297	0.773184	0.918644	0.939196
	0.145987	2.06535	0.728674	0.410978	0.590551	0.507092	0.576154	0.31274	0.946078	0.532425	1.35033	1.48098	0.278874	0.293607	0.338374	0.778601	0.326531	0.493223	0.335115	0.547547	0.263875	1.06921	1.00685	0.301949	0.277842	3.13766	0.322287	0.419233	0.525641	0.596107	0.453255	0.510057	0.695192	0.452632	0.442004	0.839907	1.24199	0.457023	1.02805	0.585366		0.331279	0.413296	0.529662	2.53844	0.704225	0.554779	0.289062	0.934029
	1.18483	0.131362	1.02263	1.23554	1.13266	1.12128	1.6	1.95422	1.26654	0.976712	0.92437	1.11111	1.47214	1.23314	1.34316	0.770445	0.842105	1.07047	1.34282	0.951658	0.85776	1.01032	1.02965	1.05015	1.2663	0.287729	1.27417	0.817476	1.41983	0.690435	1.14385	0.744951	0.581145	1.30841	0.973789	1.00896	0.983395	1.04854	0.984565	1.1315	1.18077	1.12617	1.05479	1.03347	1.03905	1.14549	0.983575	0.897547	1.05992
	2.31964		1.3845			1.64336	0.956522			1.17755	1.20721	0.509325		1.17972	1.08954	0.642957		1.43749		1.15751	1.56055		1.07167	1.73954	1.44186		2.04976	1.88368	1.24848	1.34108		1.48814	1.18753	1.95918	1.75206	1.06918	1.01584	0.97205	0.994248	0.952941				1.41752
	1.51639	0.152785	0.783043	0.922718	1.18237	1.1959	1.06557	0.653536	1.11111	1.37399	1.37722	1.89804	1.39461	1.57143	1.13977	0.388722	0.874652	1.36198	1.3682	1.36141	1.5973	0.916895	0.65515	1.41014	1.2	0.661804	1.58438	1.16581	0.825175	1.15781	1.04013	1.27977	1.17031	1.49054	1.13005	1.03756	0.941589	1.11642	0.984991	0.865672	1.63411	0.907186	1.03704	1.11711	0.836364	0.940464	0.905172	1.13118	0.648446
	1.48147	0.80636	0.776568	0.912813	1.03125	1.06134	0.993289	1.39479	0.937644	0.924893	1.10295	0.731183	1.77889	0.835979	1.29853	0.694421	1.3653	0.989193	0.865572	0.884001	1.61379	0.660723	0.913738	1.17897	1.28889	0.259082	1.30775	1.1168	0.899408	1.05113	0.942405	1.19617	1.03807	0.945887	1.03299	1.25749	0.958383	1.33755	0.991087	0.837209	1.70011	1.12944	0.943555	1.14052	0.9202	1.13814	1.15457	1.1954	0.961071
	1.348		0.695809		0.901493	0.807562			0.775396	0.951128	1.30978	1.28947			0.895282	0.481529		1.15572		0.929226	0.957175		1.05333	1.058	1.5873		0.998071	1.018	1.42675	0.905357		1.04115	1.04141	1.24358	1.01753	1.21037	1.03184	1.1042	1.02186	0.674487				0.821514		1.2984	1.26654	1.15194
	1.05024	0.494551	0.573383	0.990544	1.04021	0.967492	1.07558	1.09608	0.973196	0.887986	1.62679	1.65877	1.36919	1.69097	0.85388	0.475325	1.29368	0.951997	1.31921	0.855824	1.16599	0.704158		0.932086	0.973684	0.347395	1.18407	0.54238	1.53555	0.751569	1.13267	0.834153	0.656545	1.28833	1.01695	0.948276	0.974178	0.986547	1.0214	0.939173	1.05839	1.03297	1.17502	0.920907	1.69619	0.347909	0.430801	0.430723	1.04013
	1.44549	0.176117	0.999466	0.991175	0.951586	1.07827	0.664561	0.771631	1.02703	1.16398	0.805049	1.00405	0.975651	1.13609	1.36511	0.987747	0.983784	1.18634	0.822518	1.2556	1.6305	0.705184	0.700885	1.19146	0.983607	0.439023	1.18576	0.881698	0.726852	1.1485	1.1116	1.05858	0.907709	0.958121	1.2074	1.08052	0.948216	1.05574	1.02193	0.794613	0.779347	1.01668	0.581333	1.12549	0.903803	0.816153	0.83223	0.823529	0.838721
	1.37749	0.111199	0.667886	1.33328	1.14338	0.981311	1.16055	1.52531	0.912752	1.08285	0.66961	0.734529	1.33497	0.986639	0.837846	0.46981	1.29586	1.3419	1.21346	1.06608	1.568	0.71732	0.925373	1.17655	1.03448	0.194523	1.56453	1.22516	1.38156	1.11923	1.18159	1.2398	1.09093	1.23863	1.1619	1.3758	0.908511	1.2541	1.04067	1.20648	1.82625	1.20989	1.82484	1.17898	0.791549	1.16738	1.27578	1.4375	0.997782
	1.13803	0.491643	0.717765	0.585597	0.875	0.553084	0.959732	0.720887	0.752887	0.834737	0.533111	0.619355	0.70603	0.87619	0.429412	0.867152	0.926941	0.834353	0.862973	0.814878	1.05898	1.0409	0.747604	0.847397	0.748718	0.530158	0.592825	1.16221	0.818935	0.925761	1.00148	0.919895	1.02639	0.478355	0.766391	1.13174	0.891795	1.04641	0.932264	0.587209	1.01315	0.703607	0.608745	0.752993	1.8404	1.0866	1.25973	1.41872	0.760615
	1.04851	0.118291	0.54029	1.21112	0.926316	1.06243	1.02262	0.846109	0.835249	0.796555	0.943072	0.688211	1.46667	1.08232	0.75581	0.387652	0.8	0.804429	1.28054	0.759274	0.785989	0.797782	0.703704	0.841476	0.823077	0.35447	0.930081	0.819122	1.06509	0.796231	0.989794	0.761493	0.749697	1.59564	0.808853	1.10553	1.01048	0.850649	0.967925	1.41325	0.421218	1.00968	0.797966	0.823056	0.689408	1.20128	1.27865	1.63265	1.04895
	1.44644	0.120996	0.84219	0.799314		1.31327	1.06696	1.07081		0.926175			1.21927	1.19304	0.939142	0.709334	0.905775	1.24899	0.79779	1.0565	1.4026	0.615246	0.694377	1.14596		0.199255	1.47492	1.36304	0.983508	1.2774	0.967094	1.27797	0.928481	1.2749	1.27328						1.30562	0.909328	1.14249	1.43741	0.74433				0.737338
	1.33387	0.282604	1.31336	0.938701	1.23684	1.37279	0.812444	1.00111	1.02662	1.01988	1.69971	1.0533	1.42784	1.42289	1.29247	0.827924	1.58779	1.09404	1.26909	1.1073	1.11774	0.73916	1.10345	1.27377	1.27347	0.31228	1.61063	0.898916	1.06785	0.858318	1.20366	0.994922	0.739534	1.06894	1.30835	1.1791	0.976526	1.03704	0.961538	1.30921	1.18911	1.11362	1.01461	1.07406	0.49737	0.882479	0.955932	1.06557	1.25768
	1.92185	0.626816	1.00343	1.79222	0.98153	1.48718	1.88755	2.01388	1.13738	1.05136	0.561565	0.59917	1.77203	1.5109	1.39571	0.815905	1.32402	1.2244	0.996077	1.12709	1.78618	0.721756	0.850575	1.34403	1.51625	0.2865	1.5128	1.49367	1.04878	1.42666	1.63141	1.33643	1.23604	1.21608	1.20747	1.18056	0.947619	1.25926	0.967992	1.16667	1.59066	1.61106	1.25334	1.41235	0.75217	1.22292	1.26696	1.50078	1.19524
	1.38931	0.149378	1.26527	0.778222	1.15072	1.52437	1.09254	0.995508	1.06271	1.24658	0.26178	0.66875	1.35949	1.18367	1.19314	1.08326	1	1.51468	1.07203	1.18089	1.20599	0.842522	0.770833	1.39533	1.90937	0.444506	1.72645	1.1607	0.888489	1.37494	1.27223	1.33659	0.97976	0.871615	1.51963	1.04	0.945107	1.48901	0.986867	1.28378	1.14564	0.94283	1.22142	1.51962	0.9662	1.02579	1.11765	1.23582	0.969594
	1.17973	1.00171	0.930107	1.1317	1.04024	1.02461	1.41816	1.5533	0.950959	1.08079	1.79505	0.962617	1.01122	1.4745	1.36691	0.764265	0.951276	1.24222	1.26138	1.05849	1.25018	0.773222	0.81746	1.14819	1.25959	0.299176	1.33048	1.2508	1.42105	1.05604	1.19889	1.17488	1.26967	0.841226	1.18235	1.00855	0.961131	1.40984	1.03592	0.737864	0.777603	1.26335	0.831574	1.08703	0.658844	0.827935	0.919786	0.854812	1.27035
	1.82019	0.606438	0.745321	1.08967	0.998255	1.06671	1.1497	1.16832	0.869565	0.884556	0.410133	0.36157	1.0051	1.30189	0.697018	0.603598	1.45455	0.666517	0.950287	0.872112	1.16445	1.2742	0.827338	1.01179	1.08451	0.518659	0.594474	1.67573		0.962862	1.1301	0.941058	1.10805	1.52941	0.657096	0.961326	1.07049	0.733564	0.962282	1.4629	1.80762	0.979266	1.03207	1.02077	0.462141	1.2276	1.28788	1.56006	0.960097
	0.738815	0.173477	0.512151	1.058	0.728546	0.46113	0.827988	0.653951	0.868526	0.544399	0.833803	0.587889	0.61666	0.973312	0.616786	0.487978	0.794872	0.555674	0.862942	0.537997	0.581657	1.05757	0.602985	0.539753	0.84898	0.635801	0.526045	0.372111	0.774194	0.478746	0.97955	0.477147	0.311071	0.907801	0.638033	1.02053	1.14085	0.682105	0.996255	1.00389	0.647307	0.808156	0.57745	0.52756	1.36527	0.740991	0.749701	0.584104	0.61825
	0.592231	0.334286	1.05419	1.32499	0.915751	0.648324	1.1128	0.891792	1.05085	0.743838	1.70732	1	0.668036	0.713826		0.945429	0.786127	0.868118	0.657915	0.712404	0.52394	1.20579	0.761484	0.543245	1.05263	0.418729	0.504788	0.594483	0.701031	0.551437	0.934623	0.649108	0.745076	0.966206	0.703361	1.26034	1.00926	0.819572	1.03594	0.691131	0.590909	1.04887	1.4385	0.547959	0.527991	0.586839	0.670416	0.5824	0.84899
	0.680851	0.327653	0.77648	0.784523	0.660066	0.531417	0.653512	0.477898	0.73955	0.768214	1.1159	1.13709	0.827586	0.707379	0.453034	0.528675	0.614841	0.582172	0.711427	0.822709	0.866191	1.33115	0.81388	0.567601	0.866953	2.16663	0.363761	0.851441	1.16949	0.816921	0.75285	0.653216	0.8302	1.63448	0.636925	1.13092	1.16151	0.74786	1.03367	0.856	0.377748	0.572632	1.24923	0.603456	1.30921	1.04762	1.06765	0.823755	0.758112
	0.825429	0.899596	0.91553	0.907748	1.17139	1.0406	0.90391	0.754015	1.04904	1.05576	1.22544	1.5	1.0186	1.01082	1.44782	0.668505	0.904872	1.72978	1.30879	1.04992	1.30892	0.654665	0.888889	1.06538	1.09255	0.585967	1.20202	0.797787	1.16842	0.951487	0.957279	1.11747	1.00804	0.743733	1.21736	0.876068	0.923439	1.48946	1.01512	0.825243	0.652652	0.96369	0.949975	1.02127	0.446762	0.392713	0.417112	0.375204	1.00215
	2.47072		0.636572		1.24107	1.10661	1.07013		0.881159	0.91979	0.627586	0.24843		1.35973	0.891278	0.462158		1.12276		0.939767	1.82435		0.764706	1.44089	0.677736		1.43137	2.33019	1.34363	1.61369		1.58872	1.64512	1.47685	1.31404	1.36695	1.08295	0.988506	0.935885	0.811808				1.35002		1.17188	1.37998	1.80168
	1.67022	0.212849	0.87505	1.49268	1.30871	0.761912	1.1245	1.7354	0.971246	1.07943	0.851554	1.01245	1.36459	1.14286	0.936381	0.720341	1.02793	0.91554	0.940462	1.18189	1.50978	0.775941	0.789272	1.24005	1.41516	0.220848	1.19357	0.839207	1.35122	0.956579	1.16462	0.928066	0.914502	0.746231	1.08113	1.19907	1.00238	1.20798	1.06887	0.916667	1.34589	1.23881	1.0978	1.00273	1.54195	0.791667	0.943107	0.854003	1.00197
	0.783617		0.953996		1.01842	1.02703	0.997347		1.02637	1.04468	1.00706	1.25641		1.51258	1.28677	0.955701		1.03591		1.05107	0.636271		0.578042	0.806714	0.696774		0.796705	0.741627	1.61757	0.670698		0.632982	0.528437	1.10559	0.911779	1.05325	1.10158	0.990415	0.948136	1.46452				0.897773		0.762115	1.00097	1.45914
	1.17581	0.155568	0.75826	1.75553	1.22553	1.03831	1.48364	1.89723	0.789474	0.698097	0.884298	0.783726	1.14756	1.21661	0.597959	0.537729	0.938389	0.839288	1.11886	0.703853	0.732381	0.807296	1.24242	0.856263	0.83705		1.06182	0.914594	1.33548	0.811514	1.36674	0.680511	0.860562	1.10268	0.764545	0.798969	1.08333	0.737945	0.925959	1.45342	0.716425	1.22739	1.06123	1.03708	0.807293	0.98242	1.19016	1.08748	1.33116
	0.791241	1.12236	1.20112	0.662776	1.0585	0.667853	1.21678	1.04673	0.89441	0.890173	1.29565	1.54572	0.376196	0.982188	0.846594	1.10896	0.981481	1.03164	0.786684	0.905612	0.864069	1.0138	1.03165	0.820277	1.28814	0.48358	0.674734	0.587769	1.09312	0.652028	1.14316	0.669238	0.771913	1.07834	0.921441	1.00248	1.0493	0.784314	1.07823	0.685015	0.860323	0.917541	0.940864	0.666236	0.283824	0.476663	0.546046	0.481315	1.05841
		0.409603		1.0892	1.12713		1.28955	1.53774	1.24092		1.10995	0.74375	1.21731	1.27644			0.822967		0.910421			1.1057	0.868056		1.34743	0.318522			1.27338		1.34321			1.6349		0.677647	1.10024	0.906593	0.984991	1.10135	1.68993	0.973349	0.623028		1.3479	1.14286	1.23529	1.43284	0.984903
	0.998239	0.230453	0.854521	0.712101	0.61859	0.609638	1.6435	0.700082	0.908497	0.94482	0.894961	0.988848	0.945954	1.0798	0.713035	0.747728	1.10152	1.5689	0.866063	0.934448	1.32855	1.02752	0.580897	0.987716	0.728736	0.486396	1.07278	0.919343	1.09225	0.799619	1.36677	0.902376	0.756007	0.908306	0.812021	1.27461	1.01493	0.859107	1.03925	0.666899	0.958859	0.952414	0.660716	0.778796	0.770845	0.988945	0.94704	0.882911	0.83749
	1.10072	0.552571	0.683725	0.906488	1.1027	0.765518	0.934708	0.889652	0.809278	0.832601	0.738255	0.865096	1.37707	0.735905	0.881181	0.470979	1.27759	1.02804	0.936139	0.856483	1.15715	0.720638	0.846154	1.06201	1.30309	0.305168	1.2635	0.699386	1.22145	0.75915	0.88291	0.882466	0.748978	0.47717	0.988355	1.01515	1	1.12376	1.0054	0.962264	1.03024	1.14279	0.705359	0.920902	1.07808	0.695312	0.735484	0.58954	0.890489
	1.24461	0.295351	0.589853	0.836654	1.02178	0.924288	1.07182	0.970837	0.861905	0.974135	1.21212	1.10435	1.20078	0.764706	0.980257	0.3717	1.20207	0.894227	1.2278	0.854494	1.65063	0.643672	0.948328	1.07515	1.04545	0.3698	1.27063	0.732387	0.941847	0.998948	0.903872	1.01544	0.844236	0.736486	1.55824	1.15789	0.951613	1.26742	1.03102	0.715976	1.31677	1.04952	0.870576	1.04408	0.264274	0.79103	0.822989	0.987342	1.06638
	0.709513	0.602177	1.03294	0.870022		0.52861	1.05778	0.854174		0.721643			0.549563	1.05224	0.537249	0.768965	0.847328	0.547021	0.659586	0.763214	0.660513	1.21762	0.862069	0.655752		0.989649	0.414459	0.585952	1.00885	0.580311	1.00738	0.574786	0.678248	1.31915	0.762989						1.13319	0.871368	1.42605	0.588291	20.2104				1.01135
	1.70688	0.090243	0.840616	0.692458	1.35966	0.745626	0.666972	0.551582	1.05397	1.12629	0.691832	0.666667	1.08441	1.28065	0.917387	0.605755	0.869565	0.920199	0.865656	1.04673	1.9969	0.799221	0.767278	1.22454	1.03546	0.740233	1.14136	0.91799	1.1561	1.06758	0.895211	1.02572	0.914945	0.715909	1.14952	1.26019	0.963616	0.90429	1.04228	1.15167	1.21847	0.689321	0.740932	1.04348	0.556082	0.859244	0.892704	0.7017	0.642316
	1.0738	0.311791	0.812424	0.910215	1.4275	1.03369	0.855219	1.01187	0.973118	0.970813	1.36653	1.23585	1.30876	0.879833	1.48192	0.762427	1.18662	1.2355	1.097	0.915477	1.26169	0.866595	0.962099	1.20946	1.32484	0.41383	1.36553	0.835603	0.581315	0.983987	0.924438	1.13133	0.878289	1.34272	1.36382	1.35119	0.908898	1.03409	1.02852	0.951351	1.26885	1.07475	1.18787	1.13708	0.407413	0.668394	0.530994	0.553746	0.890728
	1.65847		0.820199		1.02381	0.862393	1.34026		0.944928	0.946068	0.751724	0.704036		1.31087	0.92511	0.469981		1.18004		0.966683	1.93811		0.869281	1.18622	1.16226		1.23715	1.04747	1.31274	0.954202		1.01883	0.910458	0.899875	1.09201	1.05322	0.900922	1.11877	1.01818	0.811808				1.01172		1.05357	1.11942	1.03193
	1.12264		0.805685			0.772491	0.333913			1.02333	1.36336	1.00965		0.341637	0.851498	0.782853		1.24879		1.02148	1.07432		1.09898	1.12883	1.46253		0.934974	0.902842	0.781818	0.807568		1.01811	0.928478	0.46712	0.983974	1.03145	0.974837	0.978261	1.02219	0.870588				0.797808
	1.30734	0.456715	0.601226	1.00124	1.0314	1.00855	0.962121	1.00504	1.07062	0.829289	0.860919	0.572165	1.66468	0.81457	1.40353	0.547053	1.71695	0.790211	0.908629	0.877415	1.54544	0.54964	0.772277	1.10647	1.2766	0.393416	1.19931	2.09722	0.990654	1.10108	0.940043	1.22728	1.02788	0.574144	1.00646	1.05938	0.937355	1.36219	0.958073	0.866485	1.42729	1.14876	1.11503	1.12756	0.951746	1.25126	1.29946	0.991228	1.03102
	0.557993	0.15415	0.590443	0.647401	1.21311	0.816026	0.780749	0.636758	1.09392	0.75516	1.3215	1.42188	0.737563	1.09611	0.420792	0.512646	0.642857	0.563286	0.762217	0.726181	0.402031	0.686237	1.0948	0.488471	1.66216	0.563622	0.603562	0.646479	1.0801	0.750698	0.791894	0.59736	0.823862	1.36283	0.608169	1.23137	1.24067	1.27835	0.868928	0.644377	0.863261	0.637961	0.989491	0.630444	2.52544	1.01726	0.82069	0.78607	0.790365
	1.237	0.588435	0.610715	0.941088	1.03786	1.03515	0.790614	0.893091	0.99115	0.940123	0.647059	0.676533	1.50356	0.738671	1.11656	0.562378	1.42959	0.744939	0.926002	0.930544	1.65242	0.419713	0.774194	1.15875	0.632576	0.264069	1.0916	1.24168	0.857143	1.10198	0.863636	1.19649	1.16316	0.628671	1.14813	1.22159	1.01099	0.808717	1.15462	0.99115	1.16041	1.12896	0.925335	1.16351	0.765664	1.20554	1.27251	1.56616	0.948012
	1.52678	0.234613	0.898277	1.3022	1.04732	1.72283	1.18584	1.62459	1.01642	0.915973	0.482574	0.615599	1.65258	1.29146	1.12301	0.830368	1.02532	0.812788	1.08057	0.899225	1.04424	0.801658	0.813992	1.08625	1.05696	0.286587	1.36001		1.21538	1.14224	1.17303	0.953564	0.933837	1.45283	1.05865	0.799639	0.998008	0.698522	0.941071	2.01932	1.19032	1.08437	0.973648	1.34208	1.80078	1.50649	1.76176	1.80734	0.97679
	0.695312	0.251458	0.698972	0.876074	0.857143	1.02047	0.548852	0.39954	0.885167	0.772993	1.25499	0.838852	0.770947	0.832487	1.17603	0.449836	0.625767	0.537449	0.781962	0.778688	0.512237	0.831584	0.577215	0.592924	0.627737	0.737754	0.603778	0.597881	1.01615	0.748835	0.691406	0.647726	0.619032	0.72766	0.702641	0.848635	0.937976	0.982379	1.03843	0.845902	0.579037	0.607978	0.931589	0.718604	0.480201	0.708804	0.706444	0.609715	0.706957
	0.175579	1.46823	0.940116	0.292469	0.567939	0.365217	0.377852	0.405059	0.894614	0.327622	1.50661	1.75542	0.192271	0.283058	0.290476	1.13562	0.393333	0.330971	0.300851	0.40596	0.156872	0.750104	0.827988		0.192754		0.20649	0.201772	0.478261	0.370658	0.412567	0.303182	0.307924	0.481481	0.490999	0.700219	1.2904	0.45283	1.01918	0.691892		0.232398		0.439078	0.272639	0.139903	0.122153	0.0697248	0.745954
	1.0576	0.243012	0.823572	0.862167	0.864353	0.665918	1.0354	0.780742	0.740899	0.589654	0.289544	0.543175	0.787167	1.25126	0.369874	0.608997	1.09494	0.908152	0.934806	0.692863	0.851112	1.18601	0.62963	0.732693	0.93038	0.642536	0.584461		1.35385	0.721503	1.03746	0.698998	0.566233	1	0.761115	0.837545	1.02988	0.676847	0.944643	0.966184	1.3296	0.883317	1.20164	0.680533	0.566537	0.992208	1.04702	1.06422	0.826481
	1.27203	0.121135	0.691988	1.0065	0.942943	0.793225	1.20536	1.30813	0.884227	0.915333	0.737226	0.988439	0.693913	1.06049	0.807063	0.484803	1.24138	0.859	1.04764	0.953671	0.904483	0.70738	0.869565	1.05877	1.70576	0.429857	0.833293		1.28436	0.858383	0.955867	0.960891	0.843863	0.871817	1.37913	1.62762	0.928144	0.894737	1.03285	0.727826	1.74206	1.06619	1.00825	0.779832	1.24468	1.32967	1.17123	1.2287	0.973067
	0.830603	0.666459	0.821163	0.681734	0.96875	0.484407	1.10811	0.73519	0.802956	0.730683	0.919192	0.814516	0.641125	0.879325	0.279114	0.761848	1.12115	0.702533	0.860284	0.752465	0.883579	0.98562	1.12563	0.719395	0.259916	0.644928	0.435208	0.97067	0.782462	0.737352	0.99373	0.736879	0.708287	0.543096	0.716403	1.125	0.905747	0.717822	0.918669	0.405755	1.46251	0.808581	1.06954	0.590156	0.75413	1.21384	1.58559	0.940984	0.912704
	1.11333	2.56217	1.22362	0.630513	0.650334	0.92521	0.548736	0.512545	0.884956	0.951771	1.3848	1.73784	0.70315	0.646526	1.25573	1.60216	0.595365	1.07419	0.627933	0.907665	1.169	0.960346	1.06452	1.12829	0.439394	1.73167	0.779835	2.00002	0.908271	1.47745	0.534406	1.32479	1.44688	0.881119	1.00071	0.988636	1.22857	0.692494	1.29032	0.625369	0.314242	0.620996	0.771782	1.06201	0.47088	1.03002	0.854742	0.872017	0.93329
	1.10758	0.977402	0.835367	0.799596	0.954813	0.619146	1.35878	1.20341	0.781491	0.736647	0.755274	0.676533	0.654108	0.935687	0.540665	1.0344	1.06276	0.996748	0.876493	0.864499	1.22303	0.873403	1.04605	0.941758	1.2834	0.339279	0.805118	1.09987	0.74216	0.870763	1.11495	0.958867	0.922281	0.585915	0.991896	1.03518	0.925307	1.1086	0.914913	0.50407	1.55289	1.05026	0.822609	0.82324	0.920561	1.13779	1.13924	1.00489	0.978267
	1.44824	0.175289	0.857357	1.05883	0.664474	1.09899	1.35484	1.42813	1.16197	1.13674	0.686459	0.676015	1.43307	1.11047	1.43416	0.567395	0.870748	1.03369	0.938325	1.06731	1.44048	0.946754	1.10757	1.18101	1.13636	0.322868	1.2486	1.37333	1.15556	1.12621	1.1577	1.26713	1.09095	1.10034	1.25478	1.18207	1.10012	1	0.943863	0.913043	1.36232	1.20519	0.995873	1.07083	1.3912	1.24945	1.30575	1.63826	1.1719
	1.42009	0.169204	0.589243	1.05051	1.23312	1.35744	1.09192	1.16636	0.520851	0.883489	1.07239	0.95	1.45972	1.203	0.813278	0.507271	0.994475	1.10113	1.03744	0.872448	1.26948	1.09769	0.76584	0.967132	1.38693	0.492243	1.17698	1.09852	0.949721	0.969004	1.28883	0.984842	0.775913	0.861925	0.947225	1.14642	0.973468	0.987302	0.949479	1.77918	1.11388	1.04412	1.22057	1.06942	0.380398	1.10849	1.61458	1.56548	1.13667
	1.19187	0.551594	0.621653	1.23115	1.06096	0.999504	1.0218	1.25302	0.989691	0.945101	1.06494	0.800948	1.77669	0.725694	1.12001	0.486561	1.83643	0.942963	1.00535	0.981651	1.29733	0.49703		1.05719	1.38596	0.224328	1.12878	0.877688	1.18483	0.962573	0.973656	1.11658	0.889222	0.788814	1.12012	1.01724	0.971831	1.35874	0.963721	0.783455	1.03533	1.29528	1.46535	1.03509	0.392074	0.946768	1.02393	0.915663	1.0341
	0.716312	0.465128	0.852888	1.21639	1.11152	0.903708	0.727273	0.782704	1.07177	1.0165	1.22727	0.901754	0.816564	0.874	1.24153	0.832671	0.822642	0.872497	0.901302	0.987188	0.781281	1.31541	0.711538	0.927796	1.00852	0.760813	0.869218	0.67228	0.868581	0.861119	1.18735	0.928766	1.22823	0.724464	0.942366	0.98441	1.0257	0.968992	1.05616	1.00804	0.987995	1.04045	1.20069	0.924165	0.441759	0.488095	0.410596	0.379205	0.886892
	1.86798	0.798521	1.41354	1.08589	1.29934	1.43054	1.25333	1.65863	1.11787	1.18095	0.712223	0.487833	1.84985	1.49254	1.16318	1.09852	1.67939	1.37367	1.0912	1.39361	1.72944	0.787277	1.11207	1.52731	1.39592	0.837261	1.56466	1.68027	1.52802	1.51304	1.56707	1.46567	1.34117	0.954894	1.66911	0.915423	1.14789	0.996633	1.11923	0.953947	1.98749	1.31654	1.35924	1.51303	0.815928	1.17949	1.23616	1.36721	1.37283
	0.646824	0.165721	0.553111	1.08218	1.13393	1.11606	0.75	0.486835	0.945813	0.786306	1.99747	1.74194	0.876356	0.886076	0.93293	0.366688	0.710472	0.728875	0.836465	0.806276	0.625544	0.941957	0.572864	0.652501	0.751055	0.758942	0.801067	0.716428	0.940978	0.863333	0.77236	0.720445	0.917129	1.01255	0.837441	0.838542	1.14253	0.707921	1.07948	1.45324	0.474153	0.724124	0.94989	0.822555	1.39116	1.07757	1.51952	1.07213	0.83863
	0.205879	1.67581	2.14905	0.369635	0.528155	0.569349	0.615819	0.371065	0.900243	0.579126	0.637216	1.18824	0.26912	0.374238	0.45753	3.60116	0.379052	1.29166	0.568744	0.548749	0.27115	1.32495	0.61658	0.331979	0.129843	3.58444	0.273487	0.350369	0.874608	0.609093	0.361987	0.503189	0.513173	0.228058	0.498524	0.666667	0.868852	0.276739	0.6	0.411515	0.100269	0.343416	0.434663	0.517672	27.4367	0.208037	0.203413	0.460481	0.711691
	1.62185	0.113058	0.519463	1.05656	1.231	0.665957	1.05483	0.742427	1.03226	0.977269	0.991304	0.887574	1.23431	1.30097	1.23732	0.543697	1.3311	0.906285	0.938933	1.01613	1.66157	0.803056	0.544118	1.09595	1.16714	0.443215	1.09088	0.66418	1.07776	0.890046	1.07239	0.927296	0.831948	0.708772	1.05842	1.25359	0.979405	1.04282	1.05155	0.786378	1.26455	1.00394	0.820574	0.960062	1.00826	0.729944	0.778302	0.655462	0.777665
	1.16515	0.324373	0.996144	0.955803	1.07721	1.099	0.917847	1.09353	0.948837	0.989908	1.03371	0.956701	1.6644	0.801603	1.21868	0.683744	1.62099	0.983792	0.972808	0.957697	1.32799	0.465416	0.7	1.17839	1.22658	0.205473	1.27321	0.953365	0.842217	0.992668	0.838052	1.13947	0.885188	0.91395	1.22955	1.14973	0.93318	1.26397	1.00266	0.753012	1.19301	1.11315	1.03382	1.13863	0.655497	0.900979	0.741676	0.905063	0.823218
	1.34947	0.110684	0.545171	0.969182	0.970297	0.744328	1.07692	1.08624	0.823151	0.956466	0.999102	0.55905	1.52532	1.05683	0.595356	0.425874	1.23675	1.27167	1.06376	0.995409	1.41219	0.8316	0.914826	1.2047	1.09871	0.298913	1.3441	1.25878	0.915254	1.01754	1.15878	1.16721	0.957525	0.889655	1.03899	1.25905	0.971363	1.20623	1.02821	0.952	2.02332	1.18008	0.86359	1.03769	1.12895	1.18367	1.22755	1.2069	0.960656
	1.33149	0.892916	0.70704	0.912875	1.24138	1.02036	1.11439	1.19247	0.973105	1.08787	0.980515	0.831111	1.42351	1.09295	1.2077	0.580746	1.23447	1.27758	1.06075	1.06797	1.62476	0.964619	0.888199	1.25827	0.767225	0.396729	1.46401	0.990927	0.983796	1.06565	1.24428	1.14218	1.05299	1.03076	1.22621	1.09852	0.926454	1.0042	0.971586	0.901961	2.01944	1.15448	1.20449	1.22231	1.71034	0.884654	0.880266	0.759571	0.965852
	1.43879	0.335002	0.673483	1.37613	0.901515	1.04843	1.81924	1.45217	0.969072	0.825797	0.833744	0.671463	1.2941	1.52542	1.18286	0.527772	1.47883	0.862223	1.25459	0.746151	1.31855	0.464733	1.05556	1.0602	1.06947	0.305934	1.27189	1.07468	0.816822	0.962799	1.38292	1.05442	0.857808	1.3084	1.17953	1.28352	0.950898	1.20093	0.984332	0.977995	1.25944	1.44749	1.28259	1.10714	1.49717	1.14172	1.15756	1.22078	1.41362
	1.31763	0.309994	0.929287	0.996662	1.19933	1.17565	1.00187	0.842455	1.02911	1.09262	1.26162	0.992879	0.935215	0.970328	1.20752	1.02881	1.16001	0.891402	1.00054	1.0799	0.976713	0.981457	0.811104	1.1842	1.05437	0.610892	0.944814	0.870795	1.37929	0.778922	1.05244	0.800841	0.791026	1.46913	1.02039	1.11349	0.991364	0.743897	0.965779	1.59814	1.20264	0.932387	0.825738	1.04146	0.931962	0.825029	0.853397	1.03131	0.852696
	0.792889		0.500077		0.806548	0.551136	0.961039		0.881159	0.812302	0.741379	0.90583		0.973884	0.579031	0.641079		0.580886		0.757131	0.973941		0.718954	0.647893	0.943396		0.540836	0.659083	1.33591	0.663905		0.68193	0.707403	1.01752	0.640484	1.05322	1.11751	0.858238	0.974163	0.608856				0.686267		0.928571	0.858866	0.786555
	1.67409	0.181643	0.871245	1.51213	1.06629	1.60352	1.54128	1.61073	0.977778	1.01507	0.856436	0.494389	1.49772	1.43871	1.37994	0.675134	0.901186	1.12327	1.37137	0.954201	1.51274	0.77039	1.12694	1.15263	1.12057	0.17408	1.40334	1.55578	1.1561	1.3313	1.68434	1.26734	1.14761	2.95455	1.17948	1.04075	0.987872	0.818482	0.922794	2.51928	1.3521	1.20988	1.48908	1.26126	1.29858	1.25	1.27897	1.59815	0.991428
	1.06373	0.161691	0.522337	1.45618	0.995646	0.873363	1.15152	1.56477	0.872727	0.88149	0.827586	0.72873	1.2326	1.31949	0.944606	0.585339	1.08977	0.938725	0.966401	0.906373	1.54514	0.823793	0.958333	0.906594	0.784906	0.533081	1.13326	0.79905	1.89726	0.83649	1.2722	0.904909	1.06063	0.518576	0.991186	0.949309	1.09091	1.04487	1.09213	1.47195	0.821108	1.3725	1.14906	0.891836	0.550837	0.64155	0.779162	0.707276	1.15224
	1.07925	0.950337	0.87367	1.48007	1.00188	0.954243	1.00337	1.77259	1.01613	1.08849	1.05403	0.976415	1.24954	1.34378	1.17893	0.765002	2.14789	1.27126	1.25774	1.13323	0.97926	0.652233	0.804665	1.14142	1.45648	0.321311	1.26802	0.886337	0.89504	0.929139	1.35622	1.07625	0.793649	1.5493	1.25947	1.33333	0.891949	1.21591	0.99287	0.735135	1.47719	1.6139	1.11621	1.09714	1.21225	0.57772	0.460819	0.446254	1.39773
	1.14276	0.26596	0.783767	1.08685	0.891259	0.955259	1.31811	1.10052	1.02973	0.883992	0.863156	0.731391	0.73234	1.16649	1.01539	0.545515	1.10277	1.05712	1.09941	0.82572	0.889613	1.1422	0.943144	0.90824	1.17252	0.701237	1.02346	0.755685	0.969231	0.676936	1.42605	0.928728	0.7891	1.44408	1.03176	1.12867	0.967953	1.00838	0.998027	1.46867	1.2518	1.00072	0.970408	0.809599	1.24648	0.922818	0.850108	0.841673	0.782407
	1.77854	0.130462	0.766785	1.11843	1.00329	1.2812	1.57209	1.0581	1.11017	1.30997	0.573418	0.839695	1.1466	1.73798	1.27015	0.567948	1.35117	1.56276	1.22239	1.2538	1.66933	0.60892	0.990811	1.45976	1.66555	0.385401	1.65921	1.43531	1.6	1.21077	1.2948	1.50172	1.50281	2.58436	1.40207	1.27273	0.996416	1.36741	1.01401	0.811881	2.16992	1.03905	1.07256	1.23722	1.08514	1.04044	1.06085	1.03819	0.779573
	1.21865	0.13459	0.434241	1.67184	1.07767	0.915123	1.29913	1.69465	0.907801	0.852981	1.14519	0.6	1.32027	1.15502	1.13356	0.396271	1.02646	0.951375	0.849254	0.866875	1.21192	0.887208	0.80292	0.935119	1.12727	0.281911	1.11999	0.995725	1.13924	0.849566	1.29742	0.916009	0.984554	0.641209	1.01036	0.915842	0.966396	1.06542	0.99633	1.54088	0.699227	1.45724	1.07787	0.9079	1.72578	1.14088	1.18735	1.17876	1.16814
	1.45874	0.233456	0.727273	1.48008	1.03284	0.653538	1.375	1.81915	0.775385	0.967915	0.800797	0.589189	1.48455	1.62315	0.730197	0.782707	1.09709	1.15704	1.04947	0.84135	1.12247	1.12952	0.848848	1.18175	1.34694	0.335247	1.10759	0.846926	1.04328	0.813608	1.46341	0.958783	0.949212	1.03442	0.920048	1.21277	0.947977	1.09155	1.1001	1.02128	1.88338	1.2677	1.37205	0.893875	0.679157	0.989407	1.03855	0.950931	1.02005
	1.65453	0.16973	0.674479	0.998921	0.949254	1.605	1.80882	1.04207	0.978462	1.12082	0.359894	0.505792	1.63135	1.87537	1.17649	0.460289	1.09709	1.36183	1.14075	1.14839	1.55618	0.877083	1.08756	1.08987	1.17551	0.455029	1.3101	1.47023	1.53986	1.25381	1.54212	1.18398	1.11157	0.998188	1.25854	1.06915	1.04971	1.11972	0.936832	1.87234	1.85131	1.11258	1.21325	1.26588	1.19438	1.16314	1.26757	1.35364	1.31695
	0.200865	2.08683	0.87778	0.360576	0.509687	0.441711	0.474486	0.286995	0.827292	0.40909	1.5689	1.41589	0.237308	0.220711	0.241146	1.12515	0.329466	0.426196	0.290966	0.441433	0.297503	0.955849	0.84127	0.231766	0.148081	2.67464	0.226283	0.243261	0.942105	0.449427	0.514213	0.367545	0.437275	0.384401	0.478626	0.675214	1.24617	0.448244	1.04348	0.445146		0.304013	0.267471	0.470279	5.49718	0.193117	0.206203	0.106362	0.762574
	1.61624	0.111143	0.571566	0.768921	0.975	0.961246	1.05485	0.745654	0.840278	0.930505	0.649451	0.456115	1.36593	1.13014	0.963286	0.471539	0.945813	1.06872	1.04898	0.889533	2.12675	0.842537	1.13228	1.13214	0.828897	0.904888	1.28898	1.29009	0.892617	1.0675	1.02708	1.14065	0.973499	0.993402	1.10695	0.839572	1.12233	0.837838	1.09057	1.04667	1.2706	0.866743	0.857562	1.15938	0.616438	1.13219	1.19215	1.43396	0.794453
	2.16491	0.252203	0.433556	1.99532	0.96051	1.14331	1.34262	1.89139	0.622979	0.889386	0.836461	0.543571	1.93922	1.19301	0.671804	0.387021	1.22099	0.928973	1.37975	0.835546	1.79482	0.962587	0.892562	1.31608	1.39196	0.199302	1.26973	3.06727	1.65084	1.4295	1.48119	1.43735	1.24687	1.07113	1.02526	1.1215	0.991766	1.02857	1.00882	1.33754	1.55819	1.57658	1.39818	1.30547	1.34207	2.75943	2.85417	1.59524	1.17602
	1.71344	0.334286	1.06794	1.29796	1.09158	1.49153	1.51745	1.98521	1.04237	1.20006	1.02009	0.568462	1.65078	1.43837	1.22986	0.80652	1.20231	1.38146	1.20245	1.24396	1.43611	0.851042	1.13958	1.58479	1.30921	0.287699	1.96203	1.83735	1.47766	1.19959	1.47852	1.37525	1.00236	1.00614	1.31008	0.817518	0.93287	0.911315	0.910599	0.88685	2.53868	1.39213	1.02911	1.36302	0.626989	1.26645	1.32958	1.7184	1.47146
	1.52616		1.03809		0.941538	1.06329	1.49746		1.10274	1.27417	1.11551	1.04072		1.81343	1.23468	0.694196		1.42979		1.08695	1.48838		0.96319	1.64894	1.50973		1.3932	1.30178	0.860499	1.15154		1.4001	1.46356	1.19008	1.27296	0.75	0.970936	0.811808	0.99325	0.539419				1.13603		0.988938	0.963387	0.697436
	0.986025	1.91178	1.02153	0.901642	1.02392	0.592697	1.09589	0.901277	0.831354	0.968982	1.09009	1.32143	1.15461	0.973294	0.696288	0.691578	0.553571	0.794488	0.966777	0.914592	1.02965	1.01049	0.888179	0.959021	1.36111		0.783336	0.582634	1.15072	0.651478	0.737001	0.685393	0.522795	0.785071	0.825938	0.866029	1.01965	1.02881	0.984043	0.753463	1.10191	0.982688		0.669546	5.37324	0.458244	0.569794	0.577997	0.931594
	0.257319	2.26372	1.15613	0.538303	0.628684	0.509899	0.565649	0.377131	0.904884	0.560008	1.5443	1.59831	0.358775	0.537201	0.321627	1.15788	0.60251	0.678642	0.665888	0.572947	0.319032	1.61337	0.710526	0.346964	0.433198	3.10059	0.313976	0.288279	0.710801	0.612929	0.468935	0.514588	0.547947	1.14742	0.539974	0.81407	1.23746	0.529412	0.925892	0.726744	0.302799	0.44847	0.847632	0.458849	0.730374	0.609603	0.52244	0.388254	0.678987
	0.752599	1.92356	1.22381	0.685633	1.20624	0.555477	1.01918	0.997099	1.43478	0.742385	1.34454	1.64444	0.432921	1.05605	0.513497	0.919329	0.973684	0.949412	0.746667	0.69402	0.737587	1.58208	1.27224	0.751436	1.59783	0.64527	0.568198	0.473313	1.00875	0.54785	1.09807	0.606151	0.697868	0.851402	0.866475	1.0209	1.03506	1.0356	1.00731	0.746177	1.56865	0.94491	0.883778	0.57718	2.2444	0.449355	0.548792	0.380952	1.06835
	0.667205	1.23857	0.682575	0.769508	0.695966	0.357571	0.928207	0.695867	0.720243	0.553885	1.10844	0.924111	0.529177	0.823398	0.391969	0.433115	0.810516	0.515886	0.883072	0.52242	0.60822	1.62355	0.675349	0.450989	0.435788	1.86994	0.257865	0.357278	1.05313	0.505306	0.845373	0.433022	0.451313	1.41115	0.378175	0.996649	1.10944	0.497175	0.961889	0.832021	0.718609	0.656911	1.05405	0.376298	0.870276	1.18225	1.1976	1.05835	0.885004
	1.20165	0.303552	0.866558	0.933924	0.996183	1.41916	1.40714	1.19101	1.05344	1.07459	0.772917	0.80427	1.45432	1.30873	1.16634	0.738916	1.47917	1.41844	0.995605	1.10667	1.33697	0.622647	0.933754	1.31997	1.55918	0.201758	1.55509	1.06725	1.14681	1.22775	1.19455	1.2694	0.913799	0.762595	1.2693	1.0027	1.01019	1.58893	0.977127	0.96679	1	1.07186	1.2	1.47063	2.04007	0.685846	0.651387	0.571429	1.0228
	2.38152	0.235294	0.925753	1.18758	1.44554	1.18381	1.82609	1.39413	1.09968	1.30599	1.12129	0.424926	1.50171	1.89992	0.906667	0.649379	1.25088	1.35258	1.26425	1.33878	2.22055	0.808996	1.07886	1.76396	1.25322	0.356544	1.67231	2.42596	1.08475	1.55032	1.55373	1.7684	1.40953	1.14483	1.11176	1.32033	0.932417	1.29183	0.99727	0.848	2.93671	1.10724	0.98735	1.40944	1.14737	1.3356	1.47355	1.85824	1.00963
	0.764274	0.17137	0.691762	0.773862	0.676819	0.578384	0.883871	0.712866	0.842809	0.744439	1.33982	1.16766	0.559524	0.890855	0.527315	0.743913	0.688995	0.703438	0.928356	0.696923	0.870128	0.817035	0.610909	0.650833	0.8	0.523153	0.973843	0.473592	0.6304	0.561863	0.871792	0.585296	0.541364	0.655046	0.710801	1.04872	1.09809	0.823529	1.08696	0.652439	0.843373	0.833503	0.878526	0.653529	0.56014	0.557252	0.525336	0.44413	0.607046
	1.85384	0.276054	1.13154	1.18215	1.1	1.89426	1.18442	0.987887	1.03053	1.2056	0.838182	0.586986	1.54571	1.33509	1.4096	0.907286	1.30769	1.04795	1.2662	1.30818	1.4333	0.814925	0.936842	1.37231	2.12727	0.408614	1.59779	1.41098	1.39249	1.21893	1.16529	1.13896	1.02721	1.65926	1.32716	1.45033	1.07481	0.935294	0.748867	2.08727	1.61175	1.0754	0.958348	1.60813	0.57739	1.18972	1.55696	1.63489	1.02404
	1.3084	0.146695	0.787468	1.14694	0.683891	1.06168	1.46736	1.19531	1.20161	1.00054	0.76	0.680473	1.47567	1.14916	1.60971	0.552991	0.929766	1.08848	1.03526	1.13545	1.52761	0.935055	0.867647	1.2217	1.04249	0.32067	1.40143	0.930513	1.30922	1.06982	1.0985	1.20205	1.01205	0.891228	1.19285	0.684211	0.965675	1.13854	0.982193	0.736842	1.38027	1.1759	1.04736	1.09372	0.464187	0.650847	0.0908019	0.867227	1.05572
	1.46015	0.262004	0.385924	1.14834	1.04063	1.0368	1.15224	1.06918	1.17492	0.944344	1.09162	0.81875	1.42273	1.24304	0.97576	0.415405	1.09091	1.09944	1.07234	0.939144	1.68043	0.736521	0.847222	1.11292	1.2568	0.343516	1.34816	0.948997	1.53597	0.917701	1.30986	1.00646	0.950021	1.06319	1.17936	1.18118	1.16229	1.2033	1.06004	1.18919	1.47315	1.06792	1.31636	1.05618	2.56472	1.01786	1.07353	1.02687	0.934935
	0.708168	1.14442	0.876077	0.939165	0.760305	0.673746	0.961798	1.00609	0.854489	0.783016	1.46131	1.39336	0.967509	0.631884	0.818649	0.816018	1.05674	0.809188	0.819089	0.798583	0.758183	0.928628	0.88	0.757193	0.680755		0.923051	0.578568	0.793103	0.608885	0.914663	0.72	0.727273	0.767282	0.895247	1.18663	1.12472	0.704478	1.04887	0.423105	0.853409	1.36725	0.949711	0.685646	0.676741	0.398693	0.373184	0.368078	0.93556
	1.44347	0.138405	0.957241	1.02678	1.15135	1.70863	0.984962	1.01538	0.956522	0.992167	0.587805	0.615267	1.52388	1.1513	1.19616	0.857794	1.02299	0.96622	1.00693	0.980494	1.00706	0.713395	0.7048	1.09658	1.15686	0.464049	1.27095	1.18614	1.07538	1.08164	0.958559	0.924948	0.790842	1.88811	0.904107	1.11005	0.969977	0.875	0.95	1.79042	1.19483	0.857954	0.804706	1.32831	0.760748	1.2348	1.2419	1.51613	0.824077
	1.19456	0.121095	0.692353	1.55014	0.987306	0.892042	1.19266	1.19395	0.933333	0.899731	0.654703	0.50165	1.02417	1.27419	1.22282	0.541377	1.50988	1.14628	0.958	0.891784	1.20422	0.869091	1.0677	1.12589	1.38298	0.233159	1.14336	0.945245	1.20488	0.814423	1.42658	1.10654	1.06797	1.57955	1.01873	1.29154	0.899669	0.666667	0.834559	1.65553	1.07508	1.46957	1.34743	0.898816	0.518167	1.04832	1.06009	0.887172	0.777736
	1.34458	0.182401	0.610049	1.199	0.875676	1.20173	1.24812	1.01868	0.949275	0.791931	0.879268	0.648855	1.39702	1.37589	1.06965	0.43752	0.942529	1.11368	1.24945	0.787565	1.27737	0.840775	0.5088	1.06873	0.986928	0.359448	1.26224	1.24127	0.98995	0.850324	1.1995	0.962675	0.852542	2.15385	0.755982	1.0622	1.0485	1.02381	0.928846	1.61677	1.32595	0.931874	1.15576	0.965489	0.813084	1.19706	1.24406	1.35484	0.772531
	0.770663		0.682999		1.44914	0.603137	1.1838		0.631896	0.832125	1.05628	1.17857		1.27324	0.748439	0.57797		0.812062		0.798427	0.884611		0.820189	0.834174	1.51691		0.503073	0.623043	1.23468	0.663758		0.742778	0.719807	0.808425	0.787909	1.28783	0.990045	1.02983	0.997563	0.683706				0.647957		0.814596	0.610778	0.660526
	1.46099	0.826695	0.755471	1.52114	1.07807	0.888453	1.44019	1.93831	0.77512	0.74015	0.550909	0.435088	1.02538	1.714	0.869397	0.564776	1.16226	0.91129	0.995606	0.716341	1.05394	1.48071	1.08974	1.04548	1.23339	0.257287	1.06208	1.15731	0.979983	0.857413	1.48187	0.867825	0.800792	0.715021	0.964934	0.917595	1.06308	0.918605	1.05254	1.0992	1.47572	1.25878	1.26054	1.0901	1.10826	1.22421	1.36424	1.42813	1.07746
		0.143848		0.767082	0.859649		0.809243	0.64879	1.06513		0.964554	0.648713	0.703671	0.995951			0.854054		0.932922			0.843869	1.11111		0.953846	0.292592			0.55858		0.955617			0.463087		1.08543	0.982538	0.746753	1.05283	0.832808	0.635907	0.86931	0.637438		0.915619	1.04153	1.07865	0.952381	0.768464
	2.24234	0.101813	0.633242	1.46048	0.947814	1.04736	0.917431	1.34354	0.806349	0.852168	0.402228	0.258086	1.59019	1.2	0.89678	0.471602	1.47036	1.09421	1.12353	0.846142	1.77537	0.595844	0.699577	1.2275	1.38298	0.203676	1.38557	1.8214	1.08293	1.31582	1.04121	1.34659	1.26855	1.00227	1.18145	0.76489	0.897464	0.90429	1.13419	1.18252	1.29955	1.30522	0.914217	1.20977	1.99157	1.23529	1.24249	1.5456	0.859237
	1.77188	0.319084	0.743252	1.04466	1.21581	1.37899	1.55091	1.38042	1.00806	0.966025	0.869565	0.692308	1.50064	1.61871	1.23732	0.57297	1.15719	1.25041	1.12327	1.08689	1.23139	0.715321	1.04902	1.4367	1.64873	0.284087	1.57431	1.11327	1.76492	1.00035	1.22138	1.20174	0.958804	0.736842	1.11683	1.21053	0.90389	1.04282	0.920337	1.13932	2.29836	1.28848	1.07384	1.22486	0.347107	1.2791	1.32783	1.62689	1.38467
	1.34329	0.154144	0.418251	1.14245	1.12977	0.849144	1.22857	1.13626	0.908397	0.894859	0.933333	0.812574	1.69988	1.17192	0.895351	0.368534	1.13542	1.04899	0.982044	0.901504	1.6103	0.688833	0.776025	1.04599	1.20816	0.257731	1.26289	0.921241	1.07479	0.819674	1.03924	0.933309	0.818617	1.08397	0.982201	1.07278	0.928652	1.0751	1.00091	1.04059	1.32754	1.13184	1.01798	0.948226	2.00546	0.932106	1.00121	0.937729	0.831596
	0.907259	0.127117	0.516838	0.962707	0.806026	0.966907	0.734007	0.647096	0.741935	0.8058	0.454449	0.627358	0.937462	1.09927	0.941397	0.410708	0.929577	0.855649	0.833023	0.805453	1.0124	0.672097	0.793003	0.787054	1.04883	0.427217	0.902689	0.722435	0.7797	0.767754	0.800603	0.832423	0.594871	0.653521	0.760776	1.30357	0.963983	0.863636	0.682709	0.578378	1.34051	0.873258	0.908203	0.878595	0.413215	0.865285	0.636257	0.651466	0.660377
	0.728555	1.2623	1.06995	0.668166	0.720848	0.798442	0.681115	0.396136	0.970732	0.785658	0.674923	0.83731	0.415032	0.689512	0.825132	1.45797	0.639498	0.713991	0.65334	0.793002	0.695695	1.02909	0.944625	0.681597	0.943534		0.410894	1.14082	0.95672	1.01409	0.38932	0.894056	1.13584	0.899073	0.640763	0.698413	1.27512	0.777778	1.05927	0.746518		0.605046		0.756619	0.646317	1.15801	1.4375	1.44086	0.852534
	1.33285	0.157111	0.857346	1.04866	1.09182	0.862227	1.29825	0.987707	0.939189	0.962469	0.622721	0.603239	1.56423	1.33728	0.737076	0.612988	1.41622	1.1391	1.22936	1.18013	1.50098	0.76015	1.0177	1.1629	1.0623	0.316641	1.32545	1.29037	1.64352	1.06799	1.18836	1.19102	1.14111	1.05414	1.12857	1.30909	0.955121	1.19344	1.05624	1.01684	2.16464	1.21306	0.840762	1.10307	0.794183	1.23698	1.2053	1.35462	0.969739
	1.32683	1.3598	0.644422	1.00403	0.578379	0.713124	0.938927	0.624579	0.906197	0.913986	1.01847	0.700908		0.738204	1.03032	0.658168	0.477064	0.551011	0.510878	1.22367	0.999043	0.792307	1.1055	0.978322	1.01034	0.868055	0.415282		0.888337	1.17045	0.874629	0.918009	1.14713	1.00182	0.927484	0.931984	1.10951	0.78912	1.01245	0.548181	0.293356	0.597888	0.967899	0.653448	1.07733	1.74514	1.87803	1.84501	1.05166
	1.11634	0.383416	0.787201	0.910897	0.861963	1.00598	0.93007	1.08168	1.04388	0.95086	0.547009	0.614265	1.51658	0.836466	0.972839	0.623796	1.31408	0.945815	0.870789	0.978231	1.36396	0.593841	0.830508	1.06417	1.07081	0.184626	1.1195	1.15437	1.28736	0.995129	0.869997	1.1477	0.810393	0.8225	1.07319	0.867416	1.02281	1.16888	0.954839	0.825641	0.967961	1.03369	0.980215	1.11203	0.880102	1.0762	1.19352	1.15297	0.858906
		3.08719		0.284371	0.770642			0.404144	0.960373		1.38215	0.823204	0.366393				0.411348		0.312425			1.06537			0.218428	2.98011					0.332804					1.21824	1.10009	0.704362	1.00969	1.04702	0.0428954	0.377235	0.258122		0.315877	1.11575	1.07434	0.707483	0.743838
	1.51133	0.125327	0.622402	1.23221	0.996795	1.13808	0.829003	0.926523	0.849673	0.822583	0.665452	0.602974	1.2668	1.02207	0.936895	0.527107	1.28426	0.945194	1.23697	0.848373	1.17152	0.798389	0.805718	1.03156	1.10345	0.415238	1.15787	0.898474	1.12177	0.861191	1.09597	0.967989	0.674908	1.45847	0.918703	1.18135	0.929966	1.08591	0.953271	1.39373	0.744526	1.05436	1.09111	1.02812	0.887907	1.13568	1.17342	1.41772	1.1435
	0.695506	0.319077	0.738735	0.986831	0.692913	0.857455	0.688462	0.792894	0.843137	0.959155	1.5295	1.12304	0.794946	0.805051	1.26767	0.688404	1.09621	1.01387	0.811942	0.882599	0.833248	1.31363	0.463014	0.877278	0.593449	0.493838	0.944593	0.614796	0.538462	0.769333	0.832316	0.7468	0.757379	0.613333	0.873795	1.0116	0.996685	0.716981	1.01357	0.98645	0.88833	0.768144	0.889307	0.952551	20.0712	0.608884	0.613054	0.596875	0.659707
	0.223358	3.3257	2.07454	0.467332	0.710306	0.688387	0.550117	0.458255	1.40373	0.898051	1.34783	1.9233	0.260766	0.361323	0.43001	2.69098	0.555556	0.658822	0.283107	0.928059	0.340934	1.31852	1.00633	0.459918	0.079661	2.90016	0.334813	0.44228	0.537112	0.945173	0.423195	0.719983	1.09419	0.573272	0.650883	1.18114	1.2277	0.470028	1.06126	0.746177		0.404532	0.748123	0.523283	0.491912	1.06058	0.975081	0.798206	0.858411
	0.959397	0.361236	0.814113	0.973649	0.75	0.867739	0.727694	0.802459	0.989691	0.898622	0.435961	0.561151	0.530873	1.12712	1.59664	0.684256	0.716612	0.867121	0.905511	0.791582	0.958901	1.03632	1.18519	0.873246	0.656842	0.885614	0.824658	1.08085	1.00935	0.953814	1.00857	0.898611	0.916348	0.767939	0.921429	0.958242	1.1018	0.864486	0.995392	1.12469	0.484676	0.684977	0.941069	0.986715	0.56934	1.14767	1.29412	1.38312	0.812317
	1.61225	0.212583	0.790284	0.940538	0.937405	1.01774	1.53258	1.85414	1.08978	1.05741	1.37316	0.83128	1.69595	1.04734	0.968429	0.680328	1.08511	0.941464	1.1204	1.09339	1.60357	0.755317	0.993333	1.18146	1.32075		1.59881	1.22203	1.1442	1.23282	1.49645	1.14152	1.23438	1.20317	1.29076	1.07521	0.9161	1.09701	1.04511	0.659206	1.35359	1.30261	1.76503	1.21573	1.89093	1.13725	1.12849	0.983713	1.15608
	2.20901	0.188744	0.956385	1.44041	1.14242	1.83875	1.6	1.53477	1.10687	1.01648	0.65	0.368493	1.8728	1.56491	1.42268	0.719133	1.66434	1.06672	1.14404	1.03239	1.46313	0.903881	1.03684	1.45591	1.85455	0.227417	1.47633	1.99496	1.23891	1.40561	1.54512	1.35245	1.23413	1.42222	1.22613	0.907285	1.14713	0.788235	0.883046	1.89818	2.26264	1.26554	1.10676	1.72252	1.48204	1.08201	1.8038	1.62677	1.15238
	1.69265	0.251187	0.896639	1.23235	1.10877	1.67851	1.16028	0.807053	0.965517	1.11231	1.22664	0.513465	1.10132	1.33603	1.30818	0.724788	0.778378	1.27149	1.3822	1.09852	1.38322	0.843869	1.1214	1.25328	0.992308	0.412466	1.45826	1.64842	1.46154	1.47295	1.26719	1.3786	1.54396	2.23154	1.25998	1.31156	0.98021	1.2013	0.909434	1.89905	0.638418	0.99634	1.98488	1.24334	1.10473	1.21193	1.30562	1.78912	0.708036
	1.69258	0.368683	0.749838	1.27063	0.92638	0.74481	1.18182	1.11019	1.27483	0.93754	0.841026	0.509461	1.55985	1.04887	0.917028	0.639202	0.888087	1.0213	0.897188	0.922509	1.37974	0.714355	0.694915	1.20073	1.41278	0.221948	1.18314	1.21208	1.55402	0.959338	1.10178	1.12458	0.749594	0.445833	1.01713	1.06067	0.9988	0.937381	1.04332	0.85641	0.966728	1.30213	1.13161	1.09778	0.904337	1.11947	1.25025	1.44193	0.973838
	0.178595	3.4974	1.33755	0.319241	0.577997	0.493782	0.505535	0.36412	1.04645	0.495197	2.53928	1.81778	0.247728	0.31665	0.25557	1.51077	0.336673	0.635854	0.470318	0.570653	0.339876	1.1733	0.782609	0.297421	0.205214	3.73957	0.312504	0.266699	0.5	0.52395	0.378859	0.490332	0.395398	0.798607	0.422675	0.669951	1.1899	0.563025	0.907424	0.929972	0.0782026	0.501455	0.398866	0.510979	1.27519	0.459378	0.381375	0.324655	0.686893
	1.3225	0.141634	0.956375	1.2541	0.690846	0.76018	1.825	1.79995	1.02857	0.923239	0.670683	0.823529	0.642564	1.05356	0.573585	0.75936	0.872093	0.746491	0.887171	1.01297	0.944075	1.04185	1.07434	0.951854	0.759382	0.452296	0.84947	0.998605	1.07	0.930019	1.32717	0.859188	0.97651	0.992481	0.890131	1.3012	1.07229	0.96875	0.88381	0.586997	1.038	1.34015	1.36483	0.846781	0.810857	1.23747	1.24563	1.39437	1.26163
	0.656816	3.80148	0.595639	1.02926	0.633124	0.52775	0.683544	0.722706	0.772727	0.61542	1.19426	0.792453	0.3881	0.676012	0.636434	0.609507	0.728723	0.461167	0.52337	0.635306	0.738155	1.59414	1.2962	0.535287	0.255725	2.28237	0.331631	1.38341	0.723013	1.06212	0.513585	0.905521	1.19389	1.55066	0.382351	0.953846	1.20909	0.774468	0.830493	0.758123	0.219542	0.702112	0.97214	0.507516	7.0508	1.27508	1.46128	1.64726	1.46559
	1.02897	1.26358	0.676744	0.776622	0.950893	0.600512	1.30405	1.04861	0.802956	0.923025	1.33081	0.919355	0.633891	0.995781	0.410387	0.747613	1.1499	0.916759	0.898268	0.924266	1.00035	1.01368	1.1005	0.807313	1.04641	0.399731	0.637623	0.943846	0.728499	0.809853	1.03422	0.800196	0.884758	0.589958	0.858715	0.770833	0.958621	0.945545	0.606285	0.441727	1.46388	1.00691	0.979029	0.637678	0.964529	0.685535	0.750751	0.688525	1.02754
	0.776102	0.21131	0.569298	0.711441	0.8659	0.51295	0.795367	0.619985	0.972789	0.764897	1.90437	1.11938	0.524791	0.777778	0.347372	0.373862	1.18889	0.681238	0.95477	0.901058	0.783798	1.19399	0.555118	0.613992	1.06312	1.25798	0.543923	0.272767	1.20737	0.630301	0.696708	0.591086	0.545455	1.16346	0.608551	1.42301	1.13292	0.6125	0.976744	0.608929	0.830855	0.664796	1.12842	0.534984	0.853125	1.27907	1.52113	1.58217	0.647882
	1.33448	0.778033	0.64468	0.870552	1.27934	0.860929	0.94697	0.811406	0.98861	0.9355	1.32159	0.974227	1.25162	0.877483	1.27277	0.526342	0.938547	1.10567	0.876016	1.03429	1.22862	0.826238	0.811881	1.23539	1.39652	0.29267	1.31472	0.841665	0.75514	0.852059	0.854391	1.03252	0.855379	0.836502	1.13607	1.05463	0.937355	1.09795	1.00803	0.790191	1.35356	0.952331	0.758261	1.02049	0.551989	0.879919	1.07892	1	0.786572
	1.35145	0.123108	0.351203	1.10868	1.10413	0.922512	1.34351	1.26243	0.843188	0.610043	0.414346	0.443975	1.34298	1.81084	0.67098	0.347223	1.11297	0.808153	1.05876	0.650952	1.01983	0.570598	0.710526	0.899783	1.16194	0.290087	1.11727	0.977159	1.31707	0.768778	0.969561	0.877933	0.62833	1.53803	0.846595	1.07035	1.02564	1.15837	0.94236	0.988372	1.70156	1.06626	0.846291	0.954602	2.86308	1.29436	1.37399	1.40946	0.951689
	1.72413	0.683249	0.749899	1.35506	1.33482	0.969838	1.52027	1.84063	0.970443	0.834736	0.911616	0.673387	1.41433	1.75527	0.909352	0.477371	1.04723	0.932642	1.18725	0.868964	1.42884	0.722245	1.30151	1.21277	0.995781	0.226612	1.29377	1.82829	0.893761	1.10615	1.41225	1.2654	1.02201	1.33891	1.16975	1.34375	0.921839	1.20792	1.02218	1.19424	1.57446	1.42857	1.11148	1.19773	1.19776	1.33543	1.8979	1.72787	1.48177
	1.409	0.116081	0.655869	1.31674	0.729508	0.963778	1.40107	1.99397	0.895028	0.684053	1.25324	1.16667	1.16691	1.96933	1.04538	0.468439	1.05238	1.16827	0.947791	0.76609	0.95892	0.841448	0.892966	1.02037	1.14865	0.229609	1.08156	1.5608	1.23301	0.960924	1.24393	0.965518	0.886754	1.04425	0.844272	0.807843	1.37967	0.820619	0.870761	1.00912	1.18821	1.11931	1.0194	1.1727	2.27326	1.7344	1.38391	1.99005	0.956022
	0.111726	2.27237	0.637193	0.272545	0.567783	0.464184	0.460586	0.356633	1.02784	0.467631	1.25474	1.90349	0.217564	0.306726	0.276423	1.10203	0.38843	0.3795	0.333715	0.399482	0.211236	1.20794	0.647668	0.266093	0.204412	3.34961	0.260176	0.193072	0.650794	0.437616	0.52066	0.393143	0.322575	0.409677	0.383847	0.542373	1.21198	0.451902	1.04143	0.641834	0.0682621	0.344689	0.564144	0.519075	3.68755	0.352127	0.319809	0.216799	0.823235
	1.52595	0.116192	0.54723	1.20898	0.874003	1.08189	1.35505	1.19084	0.899358	0.794614	0.752033	0.782842	1.07535	1.70583	0.588322	0.431281	0.971074	0.998651	0.993936	0.761752	1.06115	0.760065	1.07254	0.996069	0.669118	0.167265	1.24109	1.23172	0.78836	0.995936	0.942592	0.933389	0.877389	1.34677	0.943014	1.10412	0.751152	0.903803	1.01318	1.18625	1.33072	1.13901	1.1092	1.00566	1.96064	1.2186	1.49881	1.57528	1.15733
	1.74293	2.28187	0.836653	1.42061	1.26954	1.12337	1.557	1.83896	1.12206	0.933018	1.08672	0.557641	1.7221	1.22511	1.25203	0.851678	1.40083	1.38137	1.1858	1.00771	1.8181	0.719728	0.84456	1.35816	1.21691	0.162962	1.52405	1.91725	0.867725	1.20069	1.34506	1.41915	1.32523	1.62903	1.21899	1.1138	0.903226	1.19911	1.02825	1.10029	1.64692	1.67723	1.42736	1.30425	0.508434	1.23442	1.48687	1.45166	1.6166
	1.39856	0.228586	0.841622	1.25745	1.02102	0.692761	1.07143	1.14859	0.988345	0.852311	0.489051	0.797688	1.11739	1.28958	1.19379	0.780878	1.32184	0.747974	1.02618	0.90804	1.18594	0.849823	0.814229	1.28617	1.54321	0.475554	0.981423		1.09479	0.929707	1.45688	0.948064	0.761047	0.802762	1.24233	0.958042	0.94012	0.947368	0.990876	0.844348	1.20561	1.13017	0.746667	0.94381	0.812057	1.00549	1.13014	1.00981	0.99115
	0.816022		1.14234		1.07077	0.659957	1.16244		0.931507	0.969528	1.28639	1.42986		1.20139	0.605126	0.973074		1.03116		0.889888	0.922151		1.09202	0.898974	1.16732		0.546983	0.598863	1.1072	0.568678		0.765356	0.791886	0.933333	0.795379	0.588889	0.871905	0.726937	1.04725	0.404149				0.64904		0.294248	0.197025	0.22188
	1.28461	0.166327	0.599484	1.39666	1.10156	1.02121	1.38255	1.05453	0.951501	0.976234	0.670006	0.576344	1.47739	1.51746	1.15074	0.556327	1.33333	1.04511	0.945769	0.943954	1.32319	0.604914	0.760383	1.19526	1.3641	0.396731	1.20533	0.918697	0.956213	0.984419	1.25017	1.04846	0.781475	0.622294	1.14942	1.07784	0.965517	0.71308	0.932264	0.715116	1.5979	1.18838	0.896309	1.19117	1.03824	0.884536	0.977918	1.00493	0.932519
	1.20375	0.143102	0.920871	1.04843	1.0462	0.73026	0.864107	1.12167	0.950735	1.03887	0.752221	0.875138	0.923964	1.05019	0.69134	0.786544	1.12101	0.879792	0.950068	0.949477	1.14544	0.90178	0.844411	1.10103	0.95191	0.752636	1.10012	0.891923	0.888313	0.752802	1.45511	0.881236	0.7926	1.19579	0.977969	1.08772	0.933053	0.835203	1.05794	0.851376	1.34156	1.14761	1.32098	0.890283	1.56827	0.881851	0.791227	0.964297	0.90749
	1.39453	0.174651	0.8918	0.959037	0.835669	0.965143	1.11978	0.978013	0.595745	1.08348	0.986595	1.34286	0.837469	1.24459	1.51788	0.853481	0.911602	1.04673	0.821994	1.05796	1.52943	0.688915	0.798898	1.18131	1.47236	0.55648	1.03456	0.874539	0.888268	0.918735	1.29388	0.972531	0.771641	0.779916	0.99966	1.17757	0.977127	0.904762	0.989575	0.839117	1.29735	1.035	0.697731	0.993247	0.423096	0.490566	0.575	0.535714	0.740192
	0.641309	0.2957	0.705613	0.716762	1.03786	0.811782	0.628159	0.417455	0.890855	0.70216	1.26225	1.18393	0.470315	0.777946	0.758599	0.61501	0.524064	0.587909	0.867636	0.673597	0.527179	0.996247	0.602151	0.532682	0.537879	0.950187	0.560445	0.638224	0.833083	0.802405	0.565536	0.626212	0.790397	0.86014	0.715198	1.06818	0.826374	0.64891	1.2614	1.22124	0.641211	0.578222	0.878234	0.618461	0.46122	0.702079	0.993998	0.342299	0.58416
	1.4199	0.850214	0.83925	1.03951	1.08929	1.05117	1.08784	1.54025	0.965517	0.992472	0.75	0.76129	1.82344	0.801688	0.915087	0.615339	1.47844	0.906978	0.947414	1.03236	1.42602	0.569832	0.904523	1.23135	0.780591	0.245245	1.4052	1.22338	0.907251	1.08534	1.17236	1.21346	0.975953	0.878661	1.38835	0.661458	1.05977	1.13861	1.04991	0.884892	1.28312	1.28073	0.983002	1.17932	2.51652	0.84696	0.762763	0.895082	1.0629
	1.27048	0.658997	0.669186	1.03528	0.825893	1.00664	1.06757	1.14544	0.945813	0.814632	0.719697	0.776613	1.66323	0.78481	1.01386	0.538941	1.76181	0.826207	0.886836	0.828098	1.36009	0.510916	0.758794	1.06071	1	0.258028	1.00867	1.33818	1.13997	1.13667	0.917765	1.18234	1.0444	0.887029	0.967723	1.11458	1.23448	1.25248	1.04067	0.971223	1.13831	1.17703	1.39294	1.10605	1.29397	0.672956	1.46246	1.11803	1.03616
	0.782444	0.475269	0.814259	0.839411	1.59471	0.431706	0.977444	0.794292	0.828221	0.634429	1.39835	1.03586	0.578976	1.15833	0.371176	0.691906	0.858108	0.593329	0.949575	0.659733	0.690061	1.26564	0.572112	0.534506	0.821705	1.26773	0.464479	0.434353	0.933333	0.554875	0.959376	0.50019	0.434443	0.882621	0.606596	1.0565	1.10465	0.627304	1.07471	0.748252	0.975882	0.744593	0.772129	0.471111	3.10073	1	1.07002	1.04207	0.772872
	0.76704	0.100328	0.391278	1.28614	1.03899	0.517598	0.854701	0.712868	0.581197	0.540016	1.24027	0.81768	0.692988	0.902165	0.475045	0.319649	0.680851	0.495864	0.840802	0.457086	0.572133	1.06768	0.478515	0.628221	0.850949	0.433553	0.566779	0.347869	0.733333	0.543572	0.929657	0.51454	0.386317	1.21397	0.535582	1.0684	1.04316	1.08239	1.01292	1.26019	0.633378	0.834023	0.735095	0.596431	0.700748	1.05503	1.54159	1.2517	0.677139
	0.57999	0.279393	0.4126	0.861572	0.441791	0.486661	0.82963	0.568106	0.623077	0.575657	1.09179	0.912676	0.576577	0.667276	0.400597	0.592178	0.65798	0.565623	0.806999	0.605631	0.489965	1.47662		0.434359	0.745098	1.10594	0.442136	0.397937	1.21789	0.431296	0.785507	0.463808	0.54114	1.19938	0.63558	1.26794	0.943529	0.735043	1.10655	0.943284	0.735031	0.65047	0.740147	0.445444	0.997151	0.667302	0.702429	0.599717	0.658726
	1.2256	0.188431	0.596549	0.873235	1.04713	0.713187	0.807799	0.739073	0.92766	0.920246	1.02413	0.892857	1.25565	1.29118	1.06303	0.565534	0.685083	0.77894	1.02396	0.947899	1.06753	0.882217	0.61157	1.1687	1.1407	0.613956	1.08068	0.974321	1.1648	0.949935	1.0876	1.00691	0.653647	1.00418	0.941914	1.03427	0.982617	1.00635	0.981556	0.952681	1.47145	0.822754	0.86233	0.967643	0.846191	1.4316	1.525	1.00893	0.721676
	1.00607	0.335414	0.756473	1.11462	0.935115	0.641079	1.35	1.09191	0.854962	0.763573	0.933333	0.934757	0.692848	1.18452	0.85922	0.650708	1.28125	1.27927	0.963912	0.801513	0.923832	1.02321	0.902208	0.938466	1.2898	0.418611	0.987005	0.751786	1.32964	0.687925	1.56089	0.866545	0.765193	1.23664	0.862953	1.1159	0.983012	0.988142	1.03202	0.98155	1.03143	1.18253	0.693824	0.727304	0.788707	0.867664	0.921592	0.666667	0.979479
	2.00205	0.488337	1.04466	1.09899	1.33333	1.15419	1.42338	1.39076	0.992366	1.13654	0.447273	0.44589	0.881317	1.66667	1.19389	0.907416	1.7972	1.1993	1.00837	1.13113	1.58271	0.977612	1.06842	1.55777	1.99091	0.317773	1.1527	1.8961	1.23208	1.3008	1.18684	1.59103	1.20955	1.63704	1.16475	1.88079	1.06484	0.929412	1.02992	0.930909	2.95922	1.47658	1.19041	1.35747	0.68995	1.25337	1.54747	1.76471	1.2644
	0.735107	0.209287	1.418	0.978668	0.915152	1.15894	0.919481	0.567968	1.10687	1.01187	1.73636	1.63699	0.79841	0.878947	1.71967	1.5422	0.965035	0.921419	0.899304	0.950665	0.653167	1.14985	0.973684	0.809948	0.805455	1.37099	0.735157	0.656569	1.13652	0.797604	0.924417	0.627942	0.826969	1.02222	0.847456	1.06623	1.21945	0.7	0.990027	1.64364	0.449429	0.698185	0.810291	1.00347	11.7771	0.75153	0.851266	0.563895	0.688662
	0.956405	0.264616	0.478861	0.846831	0.992126	0.865511	0.853846	1.0144	0.877451	0.91983	0.993445	1.02908	1.41343	0.716654	0.984471	0.444974	1.18367	0.784837	1.2224	0.920547	1.52621	0.645931	1.0411	0.956649	0.470135	0.361294	1.13875	0.728328	0.602564	0.85165	0.877541	0.908725	0.801931	0.870175	1.0556	0.974478	0.963536	1.22013	0.731222	0.579946	1.09028	1.01418	0.839448	0.953715	0.894931	0.559047	0.608392	0.256563	0.925749
	0.214278	2.7066	1.83786	0.281402	0.593301	0.645598	0.44589	0.565194	1.07838	0.541163	0.918919	1.3254	0.344049	0.389713	0.461456	2.60401	0.940476	0.562224	0.351749	0.507541	0.226059	1.06879	0.747604	0.250354	0.158681		0.364955	0.376883	0.53211	0.560025	0.453593	0.572709	0.445441	0.621622	0.582554	1.14833	1.19306	0.62963	0.962766	0.759003	0.044586	0.299321		0.579637	0.747359	0.683084	0.535469	0.364532	0.705813
	0.380429	0.39661	0.726402	0.255469	0.741894	1.2157	0.693314	0.546194	1.17938	0.880684	1.14833	1.58294	1.12361	0.711806	1.10877	0.589557	0.736059	0.705889	0.857755	0.842396	0.475091	0.96495		0.634646	0.592105	1.9509	0.591	1.13403	0.830332	1.34788	0.520952	1.11181	1.7193	1.28062	0.760097	0.823276	1.20188	1.13004	0.95814	1.37713		0.445402	0.495688	0.94814	0.637646	1.12167	1.05931	1.44277	0.969123
	1.4281		0.86878		1.01846	0.764604	1.05076		1	0.99663	0.697785	0.817195		1.3252	0.770124	0.76253		1.04047		1.12831	1.64632		0.600613	1.3445	0.817121		1.27098	1.09214	1.15419	1.00448		1.15723	0.843977	1.15702	1.14323	0.95	1.17761	1.05535	0.676953	0.565145				1.07744		0.785398	0.79405	0.673504
	1.30105	0.281788	0.549366	0.75288	0.698864	0.937961	0.927039	0.869108	0.832215	1.00494	0.659091	0.612605	1.22791	1.29581	1.1206	0.399297	0.8	1.02158	1.0495	1.04	1.56042	0.932931	0.637662	1.1175	0.866667	0.864263	1.22364	1.19901	0.813688	1.02958	1.10558	1.09196	0.905329	1.65761	0.952227	1.25223	0.951049	1.02454	1.0444	0.632278	1.48148	0.904479	0.696244	1.00541	0.557592	1.24051	1.24719	1.45085	0.929525
	0.415365	0.73642	1.09576	0.556738	0.607886	0.613013	0.918387	0.432651	1.10809	0.698301	1.82634	2.1541	0.300368	0.964852	0.713571	0.954478	0.602716	1.02923	0.652275	0.832354	0.524307	1.28806	0.822091	0.409351	0.487014	2.24459	0.472814	0.234505	1.09688	0.574743	0.546763	0.605695	0.561236	0.651526	0.746396	1.5259	1.09146	0.765327	0.997259	0.714036	0.625279	0.482493	0.691698	0.49601	1.28055	0.347597	0.366356	0.272354	0.760992
	1.59536	0.143224	1.06527	1.31599	1.05263	1.21489	1.76613	1.56216	1.07042	1.17389	0.860246	0.900369	1.68796	2.33286	1.12661	0.729614	1.34694	1.45146	1.32462	1.17802	1.66894	0.816433	0.89243	1.39982	1.59091	0.23826	1.47748	1.31856	0.89697	1.13696	1.6798	1.37524	1.17607	2.19388	1.28465	1.18207	0.962606	1.24818	0.999049	0.789855	2.03642	1.23367	1.15587	1.19255	2.12366	0.997792	0.983908	0.998261	0.997923
	1.49941	1.04017	0.843528	1.21219	1.39802	1.19227	1.26519	1.49938	1.28095	1.03066	1.16723	0.630435	1.14154	1.32258	1.20087	0.724375	1.3057	1.34737	1.01432	1.48087	1.62063	0.575045	0.699088	1.53077	1.28896	0.184576	1.71521	1.42027	0.962372	1.28691	1.305	1.5247	1.16007	0.709459	1.86409	1.13784	0.9447	1.32584	1.01277	0.840237	1.2275	1.4705	1.02776	1.42227	7.97781	1.17635	1.26897	1.59494	1.20417
	0.755837	0.801625	0.746972	0.758852	0.888158	0.506166	0.951613	0.81857	0.760563	0.620942	0.738595	1.04059	0.581059	1.16786	0.350368	0.461024	0.918367	0.523786	0.940039	0.583503	0.628724	1.27144	1.21116	0.61559	1.13636	0.714421	0.339958	0.615142	0.791919	0.489699	0.877759	0.497819	0.52542	0.928571	0.54275	0.997199	1.10253	0.674453	1.0295	0.68913	1.17726	0.824057	1.11429	0.433817	0.82283	1.19426	1.2069	1.42609	1.05119
	1.26591	0.366255	0.937519	1.16672	0.295652	1.11698	1.50617	1.52	0.867303	0.938265	0.831418	0.612137	1.5002	1.16471	1.21128	0.775074	1.15789	1.07767	1.30545	0.898013	0.870184	1.05366	1.01907	1.04979	0.992806	0.374762	1.15263	0.793399	1.23358	0.756278	1.24937	0.798505	0.748664	1.21296	0.963748	1.10231	0.996409	0.865625	0.968267	1.25364	1.58596	1.17589	0.882728	1.05401	1.04871	0.662252	0.806691	0.931148	1.11494
	1.75251	0.134389	0.846127	1.39077	0.815152	1.22476	1.21039	1.07716	0.977099	1.11288	1.08182	1.04795	1.37819	1.21053	1.34655	0.74249	1.6993	1.14396	0.945778	1.06444	1.84512	0.937015	0.852632	1.37453	0.772727	0.276495	1.56927	1.03596	1.07509	1.12558	1.12739	1.21587	1.03723	1.37037	1.24109	1.1457	1.22943	1.15294	0.957389	0.814545	1.79853	1.32508	1.38117	1.21737	0.865043	0.430845	1.12342	0.953347	0.985261
	1.01886	0.140966	1.03054	1.15817	0.92635	1.06902	0.932701	0.949972	1.11348	1.02585	0.868834	0.930556	0.713761	1.07164	1.37146	1.2438	0.797872	0.96787	0.800537	1.0792	0.664902	1.35304	1.19797	0.973264	1	0.66691	0.710051	1.01749	1.04	0.866057	1.03006	0.77509	0.832267	1.40725	0.851479	1.23615	1.05088	0.848869	0.978887	1.25692	1.01037	0.883503	0.695204	1.01898	0.691525	1.10316	1.23982	1.50937	0.723064
	0.934836	0.239057	0.546019	0.554054	0.685897	0.434245	0.704532	0.397159	0.856209	0.776747	1.20461	1.15242	0.746926	0.960951	0.376785	0.445879	0.827411	0.973706	0.906397	0.763924	0.889671	1.03446	1.02274	0.696759	1.14943	0.908906	0.82162	0.559495	0.547601	0.584305	0.78759	0.63943	0.63817	0.880259	0.744106	0.948187	1.03789	0.872852	1.03925	0.780488	0.818845	0.652048	0.626007	0.634031	1.0381	0.715578	0.724818	0.607595	0.638389
	0.638616	1.76757	0.759761	0.752117	0.79391	0.510623	1.11154	0.877217	0.830326	0.617484	1.37777	1.42348	0.518519	0.935315	0.547245	0.709082	0.978196	0.743197	0.740105	0.708061	0.54218	1.30223	1.10556	0.552559	0.799821	0.762389	0.503375	0.304663	1.0103	0.380063	1.06175	0.476398	0.546468	1.01385	0.688181	1.13591	1.04215	0.737889	0.980921	0.755989	1.35243	0.996402	0.859807	0.447563	0.540493	0.270454	0.276597	0.257889	1.1699
	2.31228	0.173164	0.748459	0.645419	0.857343	0.940534	1.20473	0.757162	0.987882	1.05138	0.716237	0.615284	0.616343	1.05115	0.870853	0.487987	0.75267	0.777862	0.875374	1.41736	1.5433	0.804336	0.990392	1.35314	1.03406	0.871866	1.16298		0.905623	1.32106	1.08805	1.46768	1.52439	1.09525	1.24924	0.925008	0.993612	0.939329	1.0094	0.71826	1.0911	0.712545	1.04468	1.23604	0.998894	1.57087	1.62209	1.6027	0.886031
	1.12745	0.132966	1.00308	0.958024	0.78209	0.566949	0.919118	0.902321	1.02154	0.795523	0.621514	0.787645	0.835541	1.02967	0.557078	0.795147	0.902913	0.654866	0.810995	0.74863	0.881257	1.04055	0.625806	0.755297	1.2898	0.471594	0.803988	0.646418	0.993166	0.654722	1.026	0.70596	0.655815	1.06884	0.918788	1.08511	1.02197	0.915493	1.07872	0.900709	1.54227	0.946015	1.05864	0.714313	1.01405	0.756356	0.793651	0.632826	0.728978
	1.73187	0.150143	0.662511	1.55968	1.18779	1.1072	1.48315	1.72204	0.904025	0.898269	0.904995	0.451185	1.7858	1.30821	1.0815	0.453607	1.51773	0.892702	1.47412	0.841782	1.6178	0.926737	0.926667	1.26716	1.44151		1.36127	1.29768	1.12853	1.02099	1.31736	1.20303	1.14509	1.39314	1.0678	1.02507	0.893424	1.09701	1.04323	1.22744	2.11939	1.44707	0.971098	1.15157	1.04336	1.27233	1.31173	1.48534	1.1563
	1.94114	0.0878169	0.699321	0.610017	1.13406	0.925177	1.05318	0.590065	1.01186	1.06611	0.659966	0.449026	1.06667	0.946545	0.975229	0.510714	1.0625	0.891153	0.946102	0.995945	1.72363	0.637219	0.874494	1.22562	1.16	0.938211	1.30435	1.74946		1.21654	0.763816	1.15585	0.915187	0.88871	1.07698	1.085	0.990544	0.97973	1.0578	0.6375	1.31731	0.680849	1.03076	1.18568	1.23961	1.28922	1.28045	1.55254	0.649605
	0.97047	0.616476	0.708883	0.990147	0.824089	0.589083	1.16854	0.90933	0.913386	0.765371	0.520397	1.11538	0.639815	1.13902	0.756018	0.614635	0.880597	0.973231	0.884384	0.769946	0.853107	0.898942	0.753846	0.84734	1.12579	0.390686	0.901961	0.593653	1.04	0.575252	1.44225	0.787116	0.832494	0.885095	0.890387	0.975391	0.993166	0.96988	1.05292	1.08795	0.791606	1.05162	0.639434	0.662902	1.16327	0.516854	0.416667	0.381988	0.913988
	1.2896	0.257051	0.509144	0.786758	0.557252	1.04957	1.32143	0.632818	0.916031	0.963254	0.69375	0.466192	2.40843	1.0261	1.13241	0.408405	1.1875	0.926411	0.684807	0.945124	1.55607	0.885822	0.845426	0.992229	1.06939	0.396221	1.07918	1.14589	1.71191	1.09885	1.06852	1.12791	1.13239	0.725191	1.07037	1.20755	0.983012	1.20158	0.973468	0.944649	0.736146	0.905206	1.2585	1.06088	27.9654	1.26582	1.34379	1.40293	0.914658
	0.878223	0.715093	0.835846	0.720383	0.819018	0.641356	0.832168	0.561101	0.86836	0.68357	0.839316	0.608443	0.425728	0.776316	0.581669	0.818007	0.642599	0.67541	0.691342	0.715593	0.878073	1.13725	0.757062	0.682723	0.56304	0.79636	0.483612	1.27867	1.03908	0.755115	0.794119	0.759875	0.81468	0.326667	0.604573	0.813483	1.18367	0.812144	1.00092	0.579487	0.709797	0.721614	0.630538	0.650899	2.20918	1.15334	1.28065	1.43343	0.857763
	1.39614	0.132372	0.455642	1.03281	0.841424	0.842709	1.81223	0.897022	1.04255	1.03241	1.14963	0.764463	0.896973	1.66363	0.802304	0.363717	0.830688	1.18075	0.857658	1.07734	1.26113	0.802548	0.810219	1.2498	1.38909	0.370388	1.02922	1.11494	1.62869	0.899956	1.33279	1.10317	0.945461	0.962609	1.07409	1.27228	0.964079	0.766355	1.07706	0.716981	1.40126	1.127	0.83007	0.933906	0.831072	1.13395	1.20195	1.2885	1.00392
	0.843972	0.165989	0.709396	1.21486	0.750929	1.0122	0.799043	0.769347	0.851675	0.750056	0.981818	0.817544	0.787022	1.096	0.96485	0.48145	0.645283	0.736964	0.899018	0.790337	0.574536	0.837221	0.621154	0.669065	0.763203	0.422169	0.718246	0.728813	0.786771	0.776218	0.826543	0.711308	0.846212	0.944206	0.7754	0.98441	0.983645	0.872093	0.971014	1.29759	0.840351	0.854992	0.931716	0.800282	0.553407	0.960317	0.944812	1.0581	0.889791
	1.02049	0.177852	0.722179	0.82106	1.03883	0.674127	0.826419	0.797273	0.921986	0.860046	1.02815	0.780992	0.944289	1.25025	0.787671	0.559485	0.925926	0.915625	1.11485	0.941322	0.975272	0.95276	0.660584	1.02121	0.756364	0.695692	1.05954	0.955798	1.4346	0.815834	0.934334	0.871012	0.878528	1.13922	0.954702	0.990099	0.977984	0.903427	1.01101	0.72956	1.435	0.857944	0.983411	0.834649	1.02948	1.194	1.15815	1.08673	0.788503
	1.40533		1.22698		1.00373	1.07383	1.25432		0.896791	1.12611	0.927203	0.992084		1.11261	0.989257	0.779419		0.987252		1.0395	1.33924		0.93188	1.24084	1.47242		1.26384	0.999731	1.03767	1.00791		1.11862	0.916301	1.2963	1.3788	1.46535	0.980251	0.971875	1.00732	0.851312				1.06652		0.576159	1.28439	1.40656
	1.21688		0.583137		0.878947	0.795568	1.35809		0.685499	0.719405	1.13412	0.612821		1.00954	0.623968	0.652847		0.683412		0.720588	0.851857		0.789318	0.960517	0.649462		0.830673	1.49183	1.14212	0.804012		0.881437	0.813304	0.857143	0.814279	1.0355	1.00652	1.13419	1.01135	1.03871				0.836237		2.42291	1.83575	2.92996
	0.996302		1.12661			0.813689	1.55362			0.96078	1.21922	1.02894		1.5516	0.855575	1.16506		0.735463		1.05703	0.835724		0.989761	0.843817	0.661499		0.659513	1.42854	1.44242	1.23453		1.05828	1.3098	1.28798	0.850075	1.07547	1.07735	0.940994	1.01233	0.717647				0.83548
	1.50427	0.357587	1.04855	0.9601	1.11344	1.46006	1.26347	1.30655	1.05797	1.30384	0.979493	0.728306	1.90229	1.30503	1.35726	0.802825	1.36364	1.61345	1.15754	1.3065	1.44785	0.831984	1.1295	1.42044	1.27465	0.288218	1.79682	1.31956		1.39887	1.34334	1.32014	1.148	1.26891	1.35363	0.895028	0.905615	1.14187	0.956762	1.13074	1.42286	1.11813	1.05241	1.57114	1.42689	0.883625	0.965368	0.98908	0.971383
	1.28956		0.795866			1.16913	0.689855			1.02841	1.44144	1.27331		0.814947	1.28179	0.672619		1.20432		1.06962	0.892594		0.812287	0.951345	1.11628		1.24114	0.780151	0.866667	0.691947		0.705288	0.523353	1.33333	1.10127	1.1195	1.00839	1.04658	0.966311	1.42353				1.00082
	0.364189	0.763912	0.835798	0.424196	0.621359	0.468358	0.487991	0.405813	0.893617	0.600801	2.62222	2.04132	0.39481	0.385005	0.42061	0.747115	0.666667	0.639	0.598496	0.683678	0.308853	1.40154	0.60365	0.374271	0.241455	2.82157	0.325983	0.38445	0.995781	0.633705	0.394848	0.515053	0.620709	0.913286	0.548944	1.29703	1.18192	0.604361	0.983486	0.438994	0.0857344	0.417974	0.495292	0.432469	0.507253	0.773672	0.861314	0.60885	0.703355
	0.370157	2.11229	1.35231	0.403681	0.559284	0.762137	0.472997	0.31877	0.843823	0.755375	0.709869	1.00246	0.352259	0.442155	0.474988	1.58581	0.540146	0.55896	0.575547	0.755498	0.404258	1.02589	0.544847	0.473256	0.333612	3.2731	0.321872	0.861604	0.830882	0.998775	0.518515	0.790475	1.05589	0.230247	0.591924	0.853933	1.30314	0.546201	1.0604	0.837209		0.405599	0.416402	0.674701	2.23823	1.38479	0.912125	0.453427	0.91826
	0.566951	0.513646	1.40043	0.553679	0.880851	1.00858	0.701818	0.460106	1.11053	1.01747	1.14876	1.74732	0.588131	0.585859	0.865001	1.62972	0.2891	0.689773	0.811297	1.06312	0.533365	1.10589	1.33333	0.690854	0.692967		0.592	0.856815	1.00968	1.13964	0.576609	0.894855	1.482	1.01935	0.826932	0.912371	1.19518	0.763103	0.979483	1.47826		0.508687	0.680228	0.812526	0.555273	1.01758	0.914989	0.960549	0.622157
	0.603902	1.90301	0.811735	0.836417	0.839695	0.907659	0.615436	0.642247	0.918033	0.87305	2.26432	2.34056	0.729469	0.671488	0.747619	0.858882	0.593333	0.608421	0.770723	0.859089	0.585475	0.916424	0.746356	0.648025	0.688406		0.677943	0.742287	0.714286	0.900775	0.742559	0.707652	1.02978	1.42857	0.762833	0.778993	1.14052	0.762264	0.977169	1.54595	0.511741	0.696092		0.734063	0.449367	0.821256	0.745342	0.666667	0.662471
	0.636852	0.178821	0.719278	0.8893	0.596182	0.887913	0.947368	0.548554	0.858896	0.793984	0.882645	0.996016	0.72262	1.07778	1.18932	1.08272	0.614865	1.00662	0.82642	0.770488	0.585239	1.16216	0.828685	0.647593	0.346512	1.10685	0.741003	0.648767	1.26061	0.672998	0.820043	0.558436	0.667659	0.895359	0.66304	0.745763	1.31395	0.440956	1.00383	1.1958	0.495882	0.712839	0.775786	0.865761	0.716939	0.610309	0.630197	0.556634	0.66961
	0.45094	0.464024	0.668355	0.233737	1.33933	1.23358	0.598338	0.393226	1.36628	0.967041	2.55257	1.79111	1.15311	0.633235	1.07298	0.63082	0.580822	0.69999	0.900361	0.975571	0.434406	1.17174	0.896359	0.726091	0.546185	2.15215	0.608596	1.40874	0.694818	1.43645	0.497849	1.26131	2.00952	1.70136	0.7908	0.981221	1.16937	1.08108	0.836	1.88811	0.106692	0.439572	0.539763	1.03697	0.994604	1.38479	1.35155	1.78558	0.920355
	1.90271	0.2047	0.809555	1.31827	1.07609	1.59051	1.39729	1.66533	1.12253	0.954354	0.455611	0.356243	1.88599	1.37419	1.30069	0.631313	1.4	0.892958	1.07578	0.919161	1.40846	0.701303	0.975709	1.20455	1.232	0.529819	1.26306	1.86327		1.17092	1.24833	1.09738	0.828841	2	0.989879	1.085	0.950355	0.966216	0.872832	1.78125	2.08077	1.18707	0.885993	1.42786	1.56479	1.23799	1.34972	1.58983	1.0371
	0.640132	0.890468	1.05504	0.764032	1.07786	0.864567	0.628859	0.384691	1.03981	0.809358	1.36564	1.08359	0.509179	0.595041	0.756508	1.26864	0.573333	0.609709	0.688997	0.770796	0.503017	0.457796	0.874636	0.591812	0.76087		0.504056	0.803249	0.987578	0.941554	0.37681	0.735805	1.03953	0.686772	0.674004	0.888403	1.16159	0.758491	0.960731	0.972973	0.298785	0.44727	0.673279	0.746254	0.426972	1.10531	1.1118	1.1682	0.789879
	1.34312		0.483062		0.939929	0.909765	0.95356		0.8	0.656521	0.916409	0.655098		1.26272	0.535672	0.454466		0.753991		0.695359	0.802404		0.957655	0.841426	0.925319			1.16672	0.888383	0.823042		0.669223	0.887964	1.05046	0.823062	0.76644	1.13876	0.900794	1.06883	1.32591				0.969862		1.37446	1.44444	1.64977
		0.127347		0.917783	0.971591		1.07296	1.06783	1.04698		1.06667	1.15126	1.32031	1.09492			1.12		1.09847			0.637222	0.818182		1.10667	0.463033			1.29278		0.992764			1.3288		1.21068	0.937063	1.05521	1.05985	0.689873	1.17556	0.951882	1.17688		0.938045	0.886076	0.939326	0.850847	0.888971
	1.19615	0.32377	0.54349	0.974222	0.946996	0.880342	1.2322	1.6933	0.907317	0.937767	1.50671	1.24512	1.5138	0.764278	0.984505	0.525373	1.279	0.910516	1.22846	0.994291	1.50055	0.773152	1.11401	0.952253	1.13297		1.13773	0.803908	0.943052	0.835845	0.978066	0.883554	0.796827	1.22554	1.13349	0.870748	0.976077	1.09127	1.03059	0.635097	1.18388	1.16567	0.846197	0.945679	1.18315	0.666667	0.685185	0.635945	1.11227
	0.328828	0.981015	1.48137	0.489187	0.561404	0.495225	0.441495	0.365783	1.21073	0.775752	2.38453	3.44704	0.482819	0.566802	0.377587	2.21768	0.210811	0.578918	0.559959	0.773043	0.343768	1.07652	0.8107	0.390821	0.284615	2.09278	0.367559	0.489856	0.923077	0.662879	0.395013	0.589898	0.8492	0.833893	0.702956	1.28141	1.1362	0.564286	1.09434	0.656151	0.135593	0.362895	0.651732	0.514154	1.06284	0.619808	0.503371	0.414966	0.468919
	0.64474	1.31294	0.812477	0.595664	0.994746	0.559023	1.06122	0.567596	0.940239	0.707218	1.11362	1.30511	0.591394	0.929356		0.681871	1.41026	0.753034	0.602876	0.673176	0.889968	1.35269	0.925373	0.62801	1.39592	0.356457	0.495491	0.506353	0.942928	0.5661	1.00709	0.603723	0.597714	0.93617	0.70881	1.03812	1.06808	0.736842	1.01873	0.785992	1.05012	0.778646	1.29507	0.576301	0.641916	0.533784	0.51497	0.524954	0.885167
	1.77514	1.34203	0.973315	0.890467	1.16118	1.00479	1.64516	1.46737	0.971831	0.937846	0.574946	0.320295	0.699197	1.22812	1.01565	0.949415	1.13605	1.22269	0.906904	0.906506	1.46025	1.30992	1.37052	1.29096	1.06061	0.354939	0.950313	1.82824	0.779798	1.1912	1.28308	1.36259	1.21875	1.11735	1.08255	1.04202	1.01568	1.06569	1.05614	0.855072	2.25864	1.23768	0.925397	1.24248	1.24376	1.26932	1.28506	1.40522	1.22981
	1.13946	0.129171	0.827087	0.678878	0.923664	1.72715	0.814286	0.496406	0.885496	1.01009	1.01667	1.0427	1.29558	0.988299	1.79599	0.518165	0.864583	1.27026	0.949587	0.98074	1.31244	1.06619	0.712934	0.853336	0.677551	1.18041	1.19477	1.5557	1.24654	1.34158	0.726867	1.08675	1.24227	0.870229	0.983303	0.824798	1.12118	1.13043	0.938701	2.28782	0.643507	0.603885	0.949079	1.31943	0.659381	1.28654	1.37756	1.41392	0.844951
	1.57057	0.192918	0.895327	0.997419	0.970701	0.924929	1.06964		0.542979	1.10874	0.949062	0.885714	0.971843	1.19135	1.18079	0.815579	1.07182	1.29952	1.06127	0.972438	1.70933	0.706236	0.865014	1.31122	1.12563	0.477008	1.19463	1.15017	1.17039	0.952164	1.16177	1.09364	0.74377	1.17992	1.07838	1.21495	0.931382	1.11746	1.01043	0.763407	1.16069	1.14891	0.82118	1.06711	0.656963	2.38208	1.37292	1.34226	0.875593
	1.64107	0.165999	0.883739	1.2635	1.11083	1.05467	1.60446	1.35894	0.575319	1.00842	1.55496	1.00714	1.61193	1.35275	1.04011	0.576259	1.0884	1.1189	1.16489	0.927754	2.01462	0.928868	0.892562	1.23026	1.33166	0.426123	1.39225	1.08645	1.53911	0.959133	1.47471	1.07229	1.0237	0.903766	1.15015	1.1838	0.964318	1.0254	0.999198	1.09148	1.6649	1.30598	1.11952	1.13288	1.20718	1.22642	0.972917	0.991071	1.01354
	0.888582	0.161703	0.68133	0.727018	0.791461	0.700903	0.833948	0.478627	0.684597	0.740773	1.11251	0.826667	0.679402	0.990807	0.666092	0.653263	0.937876	0.845179	1.06079	0.769968	0.761757	1.14764	0.726708	0.786992	0.845438	0.815168	0.874557	0.557352	0.847222	0.60278	0.878775	0.611288	0.546451	0.776553	0.77611	0.773399	1.05598	0.903361	0.826764	1.05882	0.962195	0.710472	0.916987	0.817267	0.346607	0.631896	0.536585	0.058193	0.738639
	1.1671		0.490643		0.715532	0.816722	1.02994		0.862319	0.940229	1.55609	1		0.902516	1.34083	0.315021		1.03509		0.919277	0.928475		1.19424	0.902595	0.830986		1.00902	0.838391		0.817236		0.922801	0.859242	1.11765	0.928221	1.23757	1.26165	0.913495	0.99724	0.616254				0.808033		0.930999	1.06494	0.936037
	0.921976	0.621725	0.830718	0.643776	1.02128	0.857203	0.952727	0.755215	1.04211	0.899445	0.742149	0.830835	0.869796	0.969697	0.737247	0.632729	0.995261	0.981231	1.06888	0.868893	1.21306	0.609357	1.30303	0.946541	1.07376		1.06343	0.995178	1.12903	0.977249	0.948318	1.04043	1.03638	0.41369	1.08784	0.953608	1.01535	1.14046	0.950937	0.63354	0.974749	0.913471	0.856387	0.919765	0.592199	0.854188	0.709172	0.682676	0.674161
	1.47074	0.204724	1.10182	1.37304	1.12598	0.99788	1.3863	1.51999	1.03781	1.03679	0.722689	0.88254	1.94634	1.04955	0.927707	0.75663	1.42632	1.26059	1.27394	1.05011	1.72655	0.789272	1.18059	1.44245	1.36413	0.339296	1.74309	1.55385	1.53644	1.23901	1.35083	1.44813	1.36094	1.09346	1.24907	1.25373	0.946494	1.14563	1.01219	0.917431	2.34574	1.37046	1.33477	1.21024	1.46276	1.05525	0.823188	0.978355	1.0978
	1.08711	0.142812	0.834433	1.14077	0.973684	1.18884	1.71163	1.49741	0.991525	1.01706	1.33488	1.17557	1.19258	1.0443	1.29294	0.769257	0.90301	1.26431	1.41831	0.961842	0.837321	1.04811	0.910907	1.00098	0.614047	0.564394	1.15318	0.758676	1.63774	0.689306	1.08612	0.707392	0.666979	1.16708	0.900452	0.971292	0.996416	0.798722	0.870215	1.18812	1.16752	1.0599	0.851735	1.05346	1.44877	0.721311	0.725603	0.78125	1.00366
	1.14668	0.511523	0.696302	0.770626	0.671141	0.907845	0.854599	0.678796	0.792541	0.838016	0.482759	0.707617	0.769268	0.805071	0.912104	0.550587	0.722628	0.790445	0.825075	0.888773	1.13479	0.857342	0.891365	0.811323	0.818372	0.841927	0.959983	0.752114	0.716912	0.910787	0.905041	0.823003	0.713544	0.82716	0.845361	0.638202	0.910569	0.566735	1.093	0.950166	0.978884	0.727737	0.983724	0.90456	0.682997	1.03456	0.94772	1.0826	0.931231
	0.968476	0.136517	0.618263	1.05331	0.896332	0.737927	0.965753	0.982704	0.888361	0.76858	0.805405	0.72619	0.451206	1.08605	0.851892	0.583906	0.85119	0.645379	0.899859	0.759277	0.845394	0.875902	0.658147	0.865385	0.96875		0.885748	0.588141	0.880734	0.62932	1.1222	0.719723	0.884155	0.544402	0.821612	1.12919	1.03815	0.99177	1.00177	1.24654	0.723175	0.888166		0.932773	0.53081	0.706638	0.594966	0.719212	0.638592
	2.60441	0.121996	0.624886	0.994448	1.08224	1.02936	0.832889	1.09054	1.0038	0.979797	0.460058	0.232908	1.33965	1.25124	1.27434	0.734012	1.36641	1.07581	1.35283	0.985454	2.09949	0.708985	0.974138	1.49653	1.30612	0.106779	1.4392	2.96938	1.07965	1.39888	1.00736	1.54882	1.73716	1.41106	1.27871	1.06468	0.962441	1.08418	0.903846	1.18421	1.69389	1.03157	0.840533	1.32686	0.958678	1.18376	1.27006	1.77705	1.03763
	1.71034		0.860104		0.960526	0.961891	1.72944		0.781544	1.08619	0.64	0.653846		1.28534	1.20777	0.617067		1.14245		1.07273	1.64079		1.00297	1.3865	1.05376		1.07982	1.84114	1.15245	1.09874		1.29378	1.19139	1.55901	1.1267	1.11243	0.99534	0.974441	1.00648	0.748387				1.07798		1.61454	1.51111	1.59533
	0.809016	0.152202	0.59865	1.30855	1.16447	0.842174	1.20968	1.08664	0.943662	0.86005	1.22085	0.97417	0.939968	1.36872	0.950276	0.654449	0.938776	1.00451	0.798321	0.825539	1.24569	0.986223	0.812749	0.814418	0.916667	0.424928	0.920019	0.680871	0.832323	0.723148	1.30139	0.788074	0.716418	0.595238	0.87971	0.845938	1.09288	0.854015	0.99334	1.14493	0.755853	1.23654	1.04571	0.789145	4.6635	0.622517	0.588506	0.525217	1.03262
	0.55981	1.86831	1.0981	0.494362	0.911801	0.830104	0.632099	0.614261	1.33218	0.730775	0.900383	1.65699	0.316593	0.663866	0.564906	1.71847	0.631579	0.95061	0.546942	0.730784	0.508793	1.43784	1.04632	0.457229	0.414388	1.92923	0.523654	0.520993	0.643703	0.727129	0.570332	0.609449	0.636828	0.746296	0.681669	1.28053	1.0754	0.790625	0.956876	1.1895	0.727918	0.540859	0.872611	0.638922	0.601719	1.24338	1.58178	1.00984	0.749425
	0.163268	1.36184	1.39389	0.350737	0.615183	0.500891	0.631179	0.453146	1.05579	0.467728	1.44073	2	0.0780792	0.412478	0.470806	2.64157	0.392265	0.596547	0.591514	0.54736	0.281317	0.808567	1.06	0.287505	0.287069		0.314356	0.263084	0.817384	0.492868	0.414371	0.433674	0.391098	0.213611	0.576975	0.886878	1.29162	0.675799	1.03711	0.524823		0.360656	0.46138	0.501448	0.870507	0.538226	0.463023	0.321656	0.740072
	1.76893	0.441826	0.609447	0.897503	0.961538	0.894905	0.704532	0.81617	0.875817	0.99124	0.433515	0.503346	0.859022	1.10357		0.626011	0.685279	0.881835	1.01665	0.983363	1.36429	0.897069	0.548408	1.24786	1.58621	0.995159	1.12861	1.4919	1.23247	1.14237	1.09039	1.20685	1.18299	0.975189	1.10159	0.943005	0.985075	0.975945	1.01869	1.00348	1.26344	0.770904	0.827817	1.076	0.759801	1.18593	1.21288	1.51899	0.773508
	1.10917		1.18237		0.978462	1.36775	1.35025		1.19863	1.05317	1.09019	0.977376		1.10724	1.1698	0.871139		1.22663		1.01129	0.947914		1.05521	1.19639	1.11284		1.29334	1.08029	0.919236	0.858495		0.884377	0.904333	1.46556	0.99951	1.31667	0.968784	0.616236	0.958534	1.64315				1.20982		1.06858	1.12815	1.24103
	1.17098	0.131822	0.9572	1.12753	0.767075	1.05792	1.23032	1.01656	1.13147	1.07362	1.02911	1.09465	1.51757	1.15071	1.27492	0.661152	1.12821	1.13607	1.04371	0.978963	1.59789	1.01469	1.01493	1.20039	1.28163	0.383695	1.44892	0.957636	1.29529	1.0484	1.21221	1.16589	0.891304	1.15603	5.13474	1.25513	0.969484	1.13684	1.00936	0.801556	1.61874	1.16631	1.02235	1.05719	1.34371	1.02477	1.02275	1.02403	0.965824
	0.263854	2.24348	1.09735	0.316802	0.625	0.640153	0.437613	0.361391	1.22222	0.74115	1.0978	1.60432	0.338591	0.407534	0.520422	1.81728	0.453202	0.768054	0.279222	0.740515	0.309373	1.48743	1.15193	0.342209	0.188593	4.42217	0.418326	0.462559	0.718121	0.776886	0.378784	0.623935	0.845919	0.412818	0.656965	1.16043	1.18967	0.523649	1.03828	0.813333		0.383113	0.372502	0.559603	0.681018	0.825429	0.743802	0.477987	0.893102
	0.966971	0.362291	0.709416	0.83656	1.03676	1.09739	0.878187	0.554168	1.11628	0.819832	1.24521	1.20412	1.08314	0.991984	0.887931	0.47743	0.629738	0.865337	1.0678	0.829733	0.841205	0.727997	0.957895	0.857947	0.361158	0.684405	0.921039	0.96746	1.08529	1.09795	0.713246	0.846991	0.904996	1.34687	0.870726	0.962567	1.02074	0.971098	0.968999	1.18072	0.874205	0.755073	0.964451	0.928883	1.91309	1.321	1.3938	1.31962	0.783804
	0.702593	0.188199	0.980101	0.760029	0.803949	0.441516	0.697248	0.580468	0.838095	0.718097	1.58416	1.37294	0.769877	0.709677	0.409568	0.561461	0.909091	0.518527	0.965179	0.678162	0.792963	1.08026	0.600846	0.559262	0.787234	0.840295	0.337179	0.575368	0.780488	0.53851	0.685539	0.531234	0.625274	0.806818	0.615788	1.08464	1.07387	0.629043	1.02022	0.565553	0.5503	0.66963	0.915592	0.457968	0.300158	0.894958	0.896996	0.83153	0.586408
	0.805465	0.275504	0.581701	1.02645	0.883415	0.825066	0.767528	0.692359	0.855746	0.975688	1.13011	1.25333	0.760438	0.909091	1.24306	0.641329	1.14629	0.86985	0.877596	0.948648	0.842596	1.36634	0.63354	0.856799	0.875233	0.607245	0.842478	0.58762	0.842593	0.81086	1.01369	0.778785	1.11294	0.875218	0.843474	0.926108	1.00988	1.06723	1.01008	0.929972	0.958306	0.894301	0.936019	0.900306	1.44961	0.421264	0.372506	0.249617	0.743236
	0.224179		1.33783		0.992	0.579377	1.31464		1.8997	0.762991	1.05628	1.63095		1.16432	0.410944	1.55574		0.498084		0.848758	0.306874		0.750789	0.486494	0.149275		0.331217	0.485993	1.0852	0.698466		0.66055	0.797328	0.603811	0.588155	1.1632	1.10407	0.731554	1.00406	0.952077				0.528258		1.05917	0.703593	0.6
	0.761596	0.313754	0.58298	0.682246	0.715596	0.931079	0.769231	0.393055	0.615385	0.729444	1.2357	0.585635	0.53127	0.8	0.671059	0.627251	0.687943	0.692325	0.737097	0.619253	0.891961	1.51637	0.70557	0.529695	0.720867	1.21006	0.698225	0.505761	0.776812	0.611206	0.716386	0.617875	0.537205	0.849782	0.678949	1.08143	1.03765	0.901454	0.956381	1.89342	0.769437	0.660724	0.898251	0.638466	1.07731	0.483871	0.323894	0.446259	0.643548
	1.21482	0.133279	0.817223	0.921745	0.902711	0.779618	0.821918	0.843268	1.03088	0.889223	1.02703	0.781746	0.661309	0.973294	1.05746	0.620592	1.05952	1.00556	0.905923	0.950263	0.782233	0.836671	0.830671	0.955931	0.864583		0.977801	0.737119	0.844037	0.74013	0.643433	0.886043	0.658072	1.51866	0.910353	1.04306	1.0104	1.07407	0.828014	1.24654	0.648212	0.803016		0.912136	1.42033	0.942184	1.07323	1.07718	0.665283
	1.1213	0.13792	0.741323	1.05378	0.986784	1.6273	0.601504	0.784442	0.840491	0.966269	1.49752	1.34661	1.51293	0.933333	1.2971	0.799225	1.15541	1.10563	1.21587	0.932795	0.940457	0.856038	0.795219	0.953674	1.17054	0.634366	1.35987	0.764959	1.82626	0.769075	0.994742	0.75426	0.783894	1.70519	1.08097	1.11299	0.993023	0.744027	0.890805	1.76224	0.871765	0.816635	0.871251	1.25972	0.806978	0.701031	0.814004	0.867314	0.833456
	1.30865	0.862578	0.583914	1.02698	1.37978	0.865769	1.14127	0.937907	1.34884	0.947989	1.16171	0.915556	1.61604	1.01868	0.822713	0.488373	1.12329	1.00519	0.990695	0.922452	1.40831	0.697285	0.778711	1.18699	0.271486	0.351276	1.2404	0.896675	0.990403	0.851607	1.08129	1.06379	0.796014	0.593665	1.07188	0.535211	0.99768	0.806306	0.888	0.762238	1.19747	1.25114	1.16723	1.05334	0.811151	0.642857	0.526708	0.103142	0.972519
	0.767406	0.276094	0.721997	0.75989	0.849359	0.723208	1.4139	0.652281	0.947712	0.683174	1.12083	1.00372	0.585073	0.974533	0.837402	0.978502	0.918782	0.741811	0.820249	0.722966	0.666847	1.3023	0.873294	0.627788	0.766284	0.883538	0.557974	0.564045	1.22509	0.520973	0.984132	0.511357	0.490758	0.914779	0.672477	0.968912	1.08611	0.639175	0.992523	1.22648	0.913736	0.770782	0.922772	0.682723	0.644948	0.888442	0.922118	0.987342	0.808463
	1.75048	0.266071	0.381332	0.965451	1.30268	1.66291	1.19691	1.27595	1.18707	1.61898	0.437158	0.536434	1.99331	1.32576		0.366279	1.15556	1.16099	0.993557	1.51637	1.88716	0.677385	1.04724	1.65677	1.56811	0.297036	2.44621	2.77495	1.21198	1.76589	1.41324	1.88967	1.91507	0.980769	0.990892	1.00531	0.965235	1.49038	0.996422	1.16964	1.83829	1.19821	1.23229	1.89112	0.734375	1.32558	1.23944	1.33705	0.912339
	1.45383	0.493239	0.550353	1.10795	1.19672	1.03963	1.01604	1.4509	0.961326	0.908033	0.682594	0.583333	1.66871	0.815951	1.43111	0.504972	1.5	0.728925	0.983214	0.959845	1.4595	0.486377	1.14985	1.18089	0.477477	0.295414	1.18019	1.5974	1.32282	1.17366	1.01742	1.41353	1.20202	1.10619	1.12449	1.29412	0.924067	1.10928	0.896425	1.28267	0.953635	1.21609	1.0927	1.15533	1.68023	1.69987	1.41149	2.61692	1.05051
	1.32465	1.15942	0.854253	1.41845	1.27225	1.06158	1.20608	1.71969	1.11588	1.05657	0.806811	0.785219	0.839809	1.12998	1.85788	0.895527	1.47514	1.22157	1.20166	1.03712	1.60792	0.349089	1.19	1.39402	1.22414		1.61308	1.30539	1.07112	1.21065	1.46383	1.49667	1.13882	0.725898	1.44316	1.25792	0.970484	1.42922	1.02412	0.718676	1.10311	1.71498	1.31125	1.31132	0.939542	1.07238	1.02036	0.993631	1.39187
	0.667001	0.187526	0.517526	0.766898	0.731343	0.620219	0.893827	0.572425	0.826923	0.56632	0.826087	0.715493	0.519416	0.914077	0.585979	0.550088	0.65798	0.502364	0.756735	0.562123	0.602098	1.10973		0.575948	0.519608	0.698244	0.548323	0.476285	0.741703	0.461467	0.961815	0.531795	0.38688	0.636597	0.581574	0.971292	1.04235	0.797721	1.0694	0.853731	0.558386	0.719265	0.904476	0.568942	0.290598	0.957102	1	0.936351	0.794604
	1.48525	0.26795	1.14355	0.74441	1.30584	0.911955	1.25311	1.18733	0.97971	1.01259	0.583822	0.826025	0.737573	1.19082	1.01357	1.09847	1.00242	1.17651	0.947718	0.974299	1.29504	1.25372	1.12727	1.24162	1.13125	0.715384	0.844583		0.94382	1.15072	0.919295	1.12907	1.40795	1.98857	1.08332	1.78706	0.966068	1.00865	0.862385	0.669643	1.76209	0.998612	1.26731	0.952223	1.04907	1.424	1.61564	2.0448	1.02515
	0.758825	2.28948	1.12045	0.56617	0.739796	0.936142	0.695082	0.50686	0.708134	0.824904	0.454079	0.364238	0.333212	0.771574	1.34408	1.27706	0.421268	0.914738	0.673221	0.839682	0.744186	1.02544	0.981013	0.717596	0.580292	1.72328	0.669898	0.995709	0.910426	0.903917	0.638877	0.854691	0.905379	0.685106	0.694346	0.615385	0.657236	1.09692	0.873995	1.08852	0.18832	0.642195	0.755739	0.787623	0.836051	0.711061	0.949881	1.39028	1.03638
	1.51099	0.269413	0.666217	1.21017	0.995536	0.950452	1.60811	1.60658	1.02956	0.809373	1.16414	0.66129	1.14293	1.75527	0.782858	0.452103	1.01848	1.08498	1.08055	0.805801	1.34667	0.685219	1.05025	1.0404	0.932489	0.225999	1.25065	1.50257	0.988196	1.01645	1.14304	1.05189	0.930263	1.17992	1.06059	0.770833	0.547126	0.474257	0.933457	0.748201	1.56522	1.25885	0.909492	1.03176	1.28474	0.834382	1.28829	0.655738	1.3028
	1.03553	0.223117	0.409555	0.795524	0.807767	0.946923	0.920904	0.728298	0.86618	0.793237	0.682731	0.988235	1.51323	0.793734	0.822998	0.284606	1.09227	0.738178	1.19312	0.925369	1.45818	0.664247	0.958549	0.994539	1.06283	0.352078	1.03851	0.602834	1.61129	0.869222	0.861816	0.917455	0.855148	0.664748	1.1294	1.19008	1.00234	1.14149	0.814815	0.812121	1.21576	0.990619	0.930524	1.02132	1.47615	0.771527	0.577929	0.714777	0.845163
	0.752194	0.132307	0.891276	0.858764	1.15164	0.826598	0.550802	0.696136	1.00552	0.796007	0.906485	0.471354	0.567412	0.787321	0.988449	0.629053	0.57619	0.679414	0.893918	0.806553	0.536349	1.12498	1.13761	0.792046	0.986486	0.608216	0.802754	0.638438	0.849515	0.632676	0.764307	0.614468	0.60728	0.770796	0.855084	1.48235	1.02445	1.00206	0.51879	0.796353	0.3611	0.745966	0.748585	0.808431	0.805233	1.72112	1.05287	2.60199	0.711888
		0.18297		1.48475	1.11111		1.61607	1.63295	1.20435		1.50608	1.0578	2.31913	2.03604			1.29885		1.295			0.875927	1.05929		1.4177	0.292308			0.995261		1.62941			1.75227		1.42308	0.914172	1.10526	1.0219	0.774783	1.85047	1.39537	1.32952		0.716312	1.04945	1.46575	1.36293	1.05425
	1.88786	1.00812	0.676777	1.17036	1.38756	0.893047	1.17264	1.23062	1.01071	0.841892	0.672087	0.492761	1.43286	1.00628	1.04878	0.669696	1.23967	0.954041	0.892221	0.803637	1.66316	0.716019	0.849741	1.27198	1.32353	0.260622	1.28477	1.4318	0.798942	1.02351	0.930709	1.17822	0.940477	0.646774	1.07199	1.03632	0.956221	1.13199	0.845574	0.722063	1.53393	1.40377	1.07184	1.18045	1.12691	0.969337	1.16706	1.59429	1.12532
	1.77398	0.234159	0.608253	1.56705	1.04407	1.11861	1.48918	1.7191	0.888037	0.788898	0.406685	0.447447		1.29442	0.612201	0.404562	0.880734	0.967929	1.2227	1.20694	1.20502	0.968403	0.807547	1.28099	1.97477	0.299986	1.14665		1.38958	1.24213	1.18168	1.26418	0.865061	1.3914	0.738082	1.29698	0.967229	0.900943	1.00268	1.40097	1.50906	1.27893	1.18288	1.14181	0.818667	2.43582	2.91489	2.69674	1.31378
	1.30492	0.246768	0.682643	0.800181	1.36082	1.53367	0.995851	1.05081	1.03768	1.13977	0.790152	0.93918	1.79131	1.22525	1.13889	0.663082	1.20581	1.41598	1.09498	1.11197	1.56493	0.733894	1.00909	1.55106	1.22917	0.409204	1.60507		0.948315	1.38847	1.13257	1.39215	1.45809	1.24571	1.57312	0.977114	0.924152	1.57761	1.04404	1.13393	1.13436	0.970892	1.11595	1.53419	0.783982	0.944	0.944625	1.30959	0.891428
	1.09563	0.247429	0.782396	1.38703	1.18347	0.68478	1.57576	1.75429	1.03417	0.775886	0.770296	0.613402	0.755256	1.32616	0.847442	0.635551	1.0838	0.958843	0.835182	0.69885	0.92254	1.05608	0.930693	1.02928	1.1412	0.102444	1.08534	1.12626	1.03551	0.761114	1.29542	0.833425	0.707203	0.703422	0.901605	1.07363	0.976798	1.00228	1.02409	1.00272	1.16538	1.29993	0.720166	1.00149	0.771654	1.09788	1.15027	1.08187	0.935119
	0.620504	0.710934	0.861281	0.986571	0.915702	0.776317	0.713636	0.571376	1.00683	0.905371	0.803021	0.835052	0.805236	0.827815	1.06768	0.736576	0.856611	0.780534	0.644674	0.940004	0.702376	1.26709	0.544554	0.805475	1.00967	0.732459	0.634007	0.983075	0.971963	0.680547	0.882214	0.760994	0.793639	0.611407	0.756946	0.864608	1.05568	0.546697	0.876004	0.93188	0.722607	0.770925	1.10791	0.77753	0.47446	0.621594	0.553514	0.526316	0.736012
	1.50843	0.341434	0.696056	1.06872	1.23198	1.325	1.48657	1.02695	1.24092	1.04173	1.93717	1.35625	1.19971	1.14657	1.59796	0.705031	0.971292	1.10355	1.00736	1.03321	1.30027	1.07554	0.951389	1.40178	1.20242	0.298829	1.27964	0.889583	1.38129	0.885186	1.09607	0.943324	0.807518	1.32397	1.16416	0.762353	1.03819	0.857143	0.962477	1.42568	1.57114	1.05948	0.730418	1.32878	1.10387	0.795635	0.85084	0.868657	1.11014
	0.820773	0.398385	0.685203	0.990251	0.715428	0.572077	1.21465	1.02606	0.937985	0.873719	0.707746	0.922557	0.656656	0.990632	0.73779	0.705438	0.890448	0.961977	0.87636	0.988569	0.880878	0.799314	0.806401	0.766021	0.963955	0.549763	0.95669	0.672106	0.971142	0.643326	1.0534	0.698712	0.504917	0.832911	0.777799	0.911525	0.925746	0.607885	0.958967	0.552849	0.970031	1.04501	0.950828	0.710074	0.861996	0.766914	0.708584	0.584882	0.847631
	1.63428	0.167353	1.18986	1.05047	0.991304	1.29842	0.997531	1.05322	0.940156	1.13964	0.816092	0.633245	1.48654	1.08235	1.71755	1.14163	1.03158	0.909927	1.11612	1.20322	1.39965	1.02399	0.762943	1.44345	1.10312	0.405116	1.10082	1.12717	1.13671	1.07357	1.0206	1.01672	1.02315	1.62963	1.02353	0.943894	0.951526	1.08438	0.999186	1.21866	1.1112	0.958137	0.855002	1.3223	2.09312	1.25993	1.93309	2.26885	0.968801
	0.551755	3.20167	1.19448	0.538968	0.748031	0.972976	0.660769	0.515365	1.07843	0.870908	1.23234	0.738255	0.6544	0.587214	1.09808	1.64999	0.658892	1.07698	0.571978	1.01191	0.668808	1.49611	1.15068	0.707764	0.524085	2.4018	0.546911	1.23238	1.00427	1.42533	0.505691	1.16415	1.15983	1.42456	0.535844	0.816705	1.15801	0.708595	0.999095	1.05691	0.0352312	0.566307	0.653496	0.914689	0.705606	1.36078	1.41958	1.55	0.712807
		0.212354		0.981809	0.97446		1.17557	1.50423	0.930591		1.06329	0.866808	1.48906	0.640605			0.958159		1.0875			0.708143	1.02632		0.874494	0.307229			1.18118		1.05871			1.03286		0.979899	1.05909	1.13122	0.986276	0.627907	1.47074	1.16715	0.911528		1.56822	0.870564	1.04258	0.80261	0.957226
	1.75955	0.26369	0.500386	1.87321	1.18774	1.55614	1.96911	2.13664	1.0068	1.07346	1.11749	0.533333	2.31421	1.48232	1.08562	0.321916	0.988889	1.24869	1.35776	1.1019	1.63887	0.665554	1.08661	1.40471	1.56811	0.379913	1.88857	2.51656	0.97235	1.24251	1.86174	1.60853	1.13144	1.91346	1.2093	1.65664	0.856851	1.18269	0.9839	1.58929	1.98606	1.55627	1.37623	1.31395	1.4125	1.68023	1.83099	2.13928	0.99337
	0.896991	0.1188	0.777492	0.756944	1.22959	0.978149	0.521967	0.456289	0.856459	0.736263	0.985739	0.949227	0.702316	0.93401	0.880441	0.488231	0.674847	0.663877	0.973709	0.708532	0.709658	0.769756	0.696203	0.750167	0.452555	0.767105	0.899453	0.751987	0.854626	0.743178	0.618953	0.59388	0.467396	0.66383	0.793364	0.8933	0.992383	1.07489	1.07239	1.11475	0.881491	0.579675	1.06061	0.935944	7.42448	0.93228	0.735084	0.730318	0.637844
	0.783114	3.54819	1.04352	0.75893	3.87528	0.926478	0.530686	0.437636	1.27434	0.983689	0.960784	0.735729	0.569313	0.787009	1.05541	1.39296	0.959002	1.09385	0.661298	0.911441	0.777664	1.15552	0.827957	0.86029	1.70076	1.05317	0.826727	0.90737	0.633083	1.01047	0.735684	0.863547	0.889044	0.676224	0.865051	1.32955	0.876923	2.73123	1.2881	1.9469	1.00154	0.736272	1.19548	0.957343	1.45625	1.40185	1.47179	2.10846	0.824581
	1.75469	0.171925	0.822216	1.24955	1.32422	1.76163	1.44691	1.3273	1.14484	1.13649	0.969349	0.754617	1.61993	1.36134	1.44808	0.660626	1.13684	0.967607	1.15653	1.16198	1.25413	0.710775	0.817439	1.25357	1.20384		1.44393	1.20303	1.64693	1.08049	1.26449	1.10139	1.0336	1.73148	1.16881	1.17492	0.958707	0.925	0.948739	1.66181	2.03076	1.08191	1.02585	1.48209	2.67622	0.725166	1.24721	1.0918	0.940887
	1.02425	0.276066	0.800078	1.35185	1.07652	0.824051	1.59884	1.14092	0.894845	0.875102	1.08681	1.07109	1.14534	1.42014	1.07397	0.47213	1.14498	0.958746	0.947027	0.830852	1.23234	0.680198		0.995448	1.19298	0.221977	1.24919	0.760354	1.07109	0.70817	1.08573	0.788674	0.554859	0.505304	0.913006	0.935345	0.992958	0.955157	0.984186	0.914842	1.83611	1.26142	0.918237	0.960208	0.761333	0.610266	0.693028	0.692771	0.986552
	0.580645	0.257802	0.991748	0.921191	0.848684	0.74513	0.727419	0.508547	0.985915	0.782467	1.35409	1.18819	0.464848	0.645624	0.751842	1.0439	0.741497	0.8188	0.666874	0.854926	0.541082	1.10537	0.576892	0.572347	0.833333	0.915392	0.580862	0.580067	0.880808	0.596096	0.726127	0.701593	0.8118	0.566327	0.789723	1.14286	1.0953	0.729927	1.07897	0.804348	0.584913	0.738341	1.28127	0.602454	2.93698	0.653422	0.528736	0.434783	0.610141
	0.805908	0.89917	0.401602	1.07772	0.764007	0.511989	1.26339	1.15148	0.951311	0.729744	1.16183	0.88535	0.644152	0.746087	0.806823	0.389329	0.942249	0.845808	0.726349	0.756162	0.622626	1.10503	0.973105	0.73511	1.35505	0.312686	0.833627	0.557963	0.653673	0.546933	0.91533	0.698184	0.730662	0.667729	0.867301	1.05316	1.03946	1.11828	0.986021	0.570393	0.82385	1.40586	1.38067	0.617798	0.586598	0.615783	0.674157	0.597744	1.13308
	0.998466	0.137904	0.559659	1.23324	0.963235	0.917705	1.06516	1.05782	0.846512	0.689232	0.573695	0.808247	1.2321	1.43687	0.84569	0.539647	1.16035	0.879537	1.00405	0.706828	0.715555	0.720031	0.742105	0.819411	1.02215	0.194068	1.02497	0.480399	1.17697	0.646019	1.03715	0.622208	0.494303	0.850882	0.923932	0.877005	0.956221	0.828516	0.999114	1.1506	0.71208	0.955025	1.17601	0.944879	0.742408	0.718172	0.760046	0.623418	0.720378
	1.37382	0.899233	0.936858	0.870502	1.25263	0.993303	1.17994	1.04693	0.957854	1.0813	0.683136	0.609216	0.899853	1.65992	0.910856	0.811665	1.15135	1.12281	0.755359	1.04439	1.18981	1.05632	1.28601	1.2776	1.33077	0.226096	0.82758	1.29969	1.21893	1.04547	1.12478	1.10626	1.17044	1.67785	1.10495	1.28141	0.961583	1.12338	1.0283	0.731861	1.86441	1.26355	1.35734	0.967878	0.935966	1.17572	1.20899	1.34694	1.11934
	1.7973		1.63721			1.69509	1.64638			1.19794	1.02703	0.562058		1.66192	1.33699	0.869771		1.9399		1.22735	1.30774		0.846416	1.49543	1.23514		1.60392	1.72747	1.12121	1.29081		1.33334	1.0915	1.29705	1.34328	1.03145	1.01025	0.959627	0.992605	0.988235				1.3848
	1.3795	0.389713	0.61532	0.946401	0.853535	0.917028	0.852839	1.22028	0.97732	0.994505	0.387931	0.70024	1.10005	0.768362	1.3575	0.511875	0.895765	0.984881	1.15546	0.939476	1.94415	0.706431	1.66667	1.1844	1.37263	0.193513	1.31299	1.07542	1.24299	1.09747	1.01223	1.17311	0.970896	0.868702	1.17738	1.28791	0.982036	1.24766	1.05438	0.621027	1.34319	1.18964	0.895203	1.13828	1.25755	1.10406	1.11765	1.1039	1.14627
	1.2366	0.249679	0.95531	1.00965	1.375	1.57933	1.76613	1.35548	1.10563	1.207	0.779146	0.782288	1.31043	1.45194	1.42081	0.897901	1.36735	1.30195	1.11898	1.16848	1.36299	0.709693	1.19522	1.41369	1.35606	0.296869	1.58775	1.18425	0.905051	1.41305	1.43232	1.42146	0.810401	1.29762	1.45934	1.15966	0.993969	1.62044	0.972407	1.26812	1.35712	1.20806	1.22603	1.5808	0.554102	0.940397	0.862069	0.897391	1.07245
	1.12939	0.61601	0.428405	0.55323	1.23301	1.05819	1.16812	0.792609	0.801418	1.12134	1.15407	1.18182	0.641058	1.30294	0.911582	0.539361	1.01058	1.1665	0.891305	1.03015	1.06405	1.12898	0.956204	1.16096	1.05455	0.543719	0.996876	0.942301	0.987342	0.922271	0.946447	1.00045	1.02613	2.00477	1.11603	1.13861	1.03824	0.928349	0.979817	0.691824	1.20871	0.868352	0.746376	0.986899	0.92934	0.584296	0.579075	0.438938	0.879341
	0.239375	4.39083	1.89715	0.290094	0.753799	0.609777	0.479508	0.294665	1.23704	0.83892	1.58987	2.47059	0.28638	0.272727	0.30742	2.13069	0.406685	0.648816	0.304897	0.772231	0.286164	1.05683	0.584718	0.48644	0.207097	3.15589	0.371681	0.449972	0.815851	0.685969	0.445166	0.668307	0.74623	0.569401	0.616913	1	1.25467	0.280597	1.03565	0.740299		0.317434	0.400419	0.626074	0.654545	0.849647	0.700431	0.596252	0.648875
	0.748954	0.832491	0.530583	0.725399	0.586139	0.945331	0.745856	0.574333	0.857143	0.751163	1.0752	1.04348	0.680738	0.620493	1.02952	0.398664	0.450777	0.57929	0.682295	0.712125	0.852198	1.2451	1.02128	0.606236	0.873377	2.29783	0.506733	1.00178	0.652223	1.13739	0.605747	0.896618	1.09297	0.399324	0.868418	0.626566	1.11751	0.786517	0.981752	0.727811	0.116767	0.545781	0.693269	0.789463	5.17847	1.31498	1.4092	1.64979	1.06851
	2.00575	0.158544	1.14764	0.966481	1.28394	1.35093	1.13234	0.846509	1.1753	1.15601	1.00441	0.675895	1.36448	0.912988	1.62888	0.915239	1.00958	1.02719	0.916828	1.1945	1.80479	0.985869	0.987015	1.57088	1.18332	0.725891	1.17956	1.51513	1.03434	1.22162	1.19936	1.31667	1.27896	1.53594	1.30495	1.00924	0.966535	0.857511	0.984453	1.35691	1.19566	0.934279	0.750555	1.49197	0.652338	1.79079	1.7254	1.96289	0.925571
	1.75288	1.87607	0.834923	1.44793	1.13281	0.990971	1.81879	2.28435	1.12702	0.961843	0.498609	0.430108	1.17023	1.33968	1.35699	0.755232	1.08219	1.08514	1.13997	1.00611	1.93103	0.874974	1.25879	1.4321	1.09744	0.147984	1.39191	2.31523	0.975148	1.45077	1.50321	1.64753	1.4503	1.01623	1.35405	1.46707	0.901308	1.28692	1.00178	0.761628	1.1056	1.70247	1.08847	1.31172	1.1995	1.27835	1.13565	1.31691	1.55405
	1.69354	0.205219	1.04272	1.29665	0.991511	1.02424	1.08482	1.3677	1.10861	1.13838	0.687137	0.694268	1.01117	1.48	1.284	0.856809	1.20365	1.33583	0.903332	1.2605	1.53798	0.796246	0.743276	1.29985	0.990228	0.398757	1.18801	0.995829	1.03148	1.12293	1.25728	1.07952	0.943698	1.0757	1.06458	0.911392	1.23112	1.16129	0.980429	0.503927	1.73356	1.30514	0.82057	1.20745	0.958763	0.771022	0.649189	0.526316	0.93576
		1.96998		1.25057	1.14468		1.71636	1.56794	0.984211		0.690909	0.543897	1.42675	1.51291			1.52133		1.06059			0.74582	1.32576		0.998285				1.23226		1.29463			1.51786		1.15979	0.921053	1.11111	0.970562	1.14907	1.47307	1.48607	0.94284		0.933764	1.16443	1.23266	1.26587	1.21462
	0.895592	0.0780448	0.641354	0.768853	0.970395	0.535158	1.08444	0.755473	0.760456	0.890553	0.895091	0.787949	0.71793	1.36816	0.528183	0.586326	0.938931	0.687648	0.579803	0.89039	1.01805	0.689955	0.896552	0.965401	1.16735		0.666257	0.769121	1.41003	0.695313	1.15656	0.759131	0.758308	1.19149	0.80435	1.24876	1.03286	0.882155	1.06346	0.690789	1.17513	0.831196	1.25229	0.700768	1.23065	0.897436	0.845198	0.901639	0.78318
	0.741284	0.363371	0.874621	0.909234	0.912844	0.461226	1.1453	0.883863	0.777001	0.738926	1.24027	0.98895	0.583702	0.881385	0.394334	0.513801	0.822695	0.629481	0.850364	0.701717	0.652733	1.24567	0.647215	0.559261	0.905149	0.715959	0.390744	0.388589	1.41159	0.554455	0.886336	0.530503	0.38301	0.89083	0.803114	1.40717	1.045	1.00162	1.00323	0.752351	0.607909	0.854361	1.02642	0.493917	0.9335	0.870968	0.635398	0.533333	0.827695
	0.333453	0.550245	0.710991	0.592468	0.558209	0.303901	0.464706	0.390232	1.01538	0.56071	1.28685	1.80695	0.479029	0.543027	0.270399	0.662417	0.417476	0.687596	0.544203	0.535357	0.291267	1.32348	0.661751	0.29763	0.396735	1.65817	0.319376	0.262068	0.810934	0.451909	0.418827	0.410479	0.578758	0.831522	0.509003	1.04787	1.2	0.521127	1.03401	0.414894	0.526725	0.459683	0.77837	0.334952	1.54098	0.618644	0.659864	0.453469	0.611578
	1.18198	0.461392	0.789184	0.531047	0.570992	0.596885	1.02921	0.713977	1.06502	0.854224	0.648384	0.621801	0.697152	1.01836	0.776432	0.559089	1.0922	0.724044	0.789115	0.944481	1.46643	0.840712	0.88	1.05891	1.01132		0.984544	1.06016	1.49216	0.973586	1.1567	1.01295	1.12784	0.71029	1.00951	0.880223	0.798186	0.91791	1.0188	0.636823	0.695161	0.852379	0.678613	0.834752	0.86071	1.07407	1.05922	1.27687	0.770342
	0.947988	0.14951	0.808931	1.07187	0.967164	1.02351	1.24265	1.10203	0.984615	0.893727	1.48738	1.42085	1.36313	0.982196	1.13877	0.67095	0.640777	1.02999	1.29415	0.960685	0.671459	0.925495	0.894009	0.862831	1.11837	0.358271	1.07568	0.474611	0.587699	0.60341	0.917724	0.599083	0.417637	1.03986	0.858418	0.904255	1.01272	0.725352	0.94655	1.5461	0.825073	0.91577	1.00152	0.921436	0.75644	0.622881	0.705215	0.741117	0.796895
	1.28575	0.722232	0.659119	0.869784	1.27964	0.79352	1.31157	1.22255	0.839161	0.833624	0.93698	0.579853	1.16163	0.919176	0.835727	0.671432	1.58394	1.0326	1.07762	0.881744	1.54044	0.764248	0.835655	1.05116	1.06472		1.0208	1.46683	1.44853	1.1299	1.09473	1.21564	1.17664	0.443827	1.02243	0.966292	1.05459	1.17454	1.08341	0.757475	1.16861	1.18405	0.97696	0.994313	1.2123	1.43318	1.31924	1.56766	1.10589
	0.640566	0.727886	1.00011	0.888482	0.81336	0.901597	0.78626	0.699297	0.951157	0.864678	1.35021	1.18393	0.499757	1.02648	1.07055	0.937257	0.543933	0.832818	0.830862	0.917016	0.621709	0.967952	0.736842	0.739884	0.959514	0.912539	0.716535	0.662612	0.891986	0.650082	0.917082	0.782523	1.02319	0.828169	0.757026	1.05025	0.985507	1.02715	1.03019	0.930233	0.652126	0.879684	1.22453	0.685331	0.503271	0.588727	0.513234	0.515498	0.923726
	0.975745	0.0978459	0.576009	0.667701	0.596491	0.543	0.974435	0.550568	1.03448	0.82809	1.01826	0.850987	0.770631	0.923077	0.731933	0.600451	0.8	0.727714	0.794472	0.768414	1.17212	1.12163	0.802469	0.835213	0.8	0.661449	0.678056	0.677002	1.01183	0.659704	1.00576	0.776189	0.719029	0.798658	0.792658	1.22613	1.0454	0.805195	0.94717	0.637224	0.602637	0.855647	0.74519	0.630454	0.667864	0.815761	0.889888	0.887755	0.545809
	0.551989	0.672705	1.06235	0.574871	0.730366	0.898752	0.815209	0.490143	0.944206	0.932067	2.03012	1.84296	0.43695	0.745234	0.796924	1.0773	0.430939	0.622068	0.660384	0.921926	0.48069	0.580516	0.955	0.591936	0.668103		0.472642	0.752442	0.930641	0.877762	0.502252	0.748628	1.06591	0.627599	0.716112	1.00452	1.19481	0.826484	0.974026	0.874704	0.161635	0.511082	0.638093	0.675018	3.28922	1.04383	0.904609	0.859873	0.743083
	0.96902	0.290149	1.02476	0.739539	0.851419	0.580075	0.764912	0.580142	0.864865	0.799965	0.98317	1.03644	0.669186	0.846154	0.549273	0.84229	0.767568	0.600217	0.899793	0.775198	0.780354	1.10837	0.631858	0.643074	0.714754	1.46376	0.56712	0.628156	1.44444	0.728331	1.02641	0.647121	0.693362	1.2523	0.616351	1.06494	1.02417	0.747541	1.07912	0.841751	0.956649	0.763644	0.946286	0.647452	0.304251	0.950053	0.891832	0.779832	0.726616
	1.71384	0.137681	0.615361	1.519	0.953368	1.15987	1.14	1.3955	0.897959	0.865621	0.662651	0.601238	1.76993	1.38367	0.845283	0.467723	1.16279	1.0268	1.14271	0.858175	1.1994	0.851386	0.772182	1.11185	1.17439	0.293056	1.28451	0.981632	1.18667	0.950691	1.23095	1.05368	0.803942	1.6015	1.18356	1.34458	0.983133	1.10417	0.990476	1.39319	2.15305	1.20532	1.28305	1.10266	0.756573	1.24401	1.28056	1.40141	1.15513
	1.43492	0.115614	0.793901	1.24582	1.44259	1.16645	1.09041	1.23662	1.54442	0.881888	1	0.965079	1.57224	1.14216	0.998449	0.46355	1.26316	0.973765	1.33484	0.943648	1.05949	0.962275	0.889488	1.16403	1.59239	0.225124	1.17075	0.872446	1.47813	0.832169	1.14532	0.992254	0.826263	1.74766	1.35227	1.04478	1.01292	1.08414	0.995938	1.44954	0.802107	1.11831	0.911252	1.03158	0.993492	1.20258	1.06667	1.13709	1.23882
	0.991011	0.0869752	0.589173	0.931789	0.770992	0.785791	0.85	0.851506	0.946565	0.815193	0.975	0.792408	1.02191	0.747075	1.08923	0.389624	0.989583	1.08832	1.26143	0.812154	0.884317	0.683187	0.66877	0.900808	0.922449	0.370337	0.93809	0.938093	1.29086	0.828466	0.727956	0.926003	0.867141	1.20611	0.88268	1.09434	0.996602	1.04348	0.995425	0.639852	0.837055	0.850405	1.03662	0.770049	1.40619	1.14384	1.20386	1.21978	0.768404
	0.553481	1.47288	0.921188	0.818269	1.02564	0.535267	1.14079	0.910953	0.823529	0.7994	1.65149	1.50929	0.505004	1.08659	0.661907	0.798746	0.979695	0.868276	0.802346	0.765009	0.727494	1.11121	0.692658	0.65041	1.21073	0.799949	0.462362	0.39322	1.29889	0.509465	1.27257	0.591233	0.587338	0.796117	0.729438	0.989637	1.093	0.769759	1.01308	0.584669	1.17651	1.08398	1.15161	0.549583	0.378796	0.426131	0.375909	0.392405	1.15004
	1.31874		0.541085			0.555005	0.782609			0.89986	1.46547	1.1254		0.992883	0.867179	0.547628		0.736612		0.884543	1.04407		0.548805	0.987981	1.52455		0.739432	0.671235	1.23636	0.712767		0.739497	0.699687	1.22449	0.80943	0.993711	0.974837	1.12422	1.03205	0.858824				0.714115
	1.34956	0.158452	0.581353	0.978442	0.929825	0.66343	1.05211	1.04897	0.835249	0.794364	0.524168	0.463196	0.724229	1.1498	0.759631	0.608627	1.13514	0.624336	0.996446	0.737254	1.059	0.865804	0.911523	0.89424	1.21538	0.472668	0.816309	0.927827	1.15385	0.738019	1.07971	0.828967	0.957088	0.961409	1.05151	1.1407	1.00815	0.850649	1.01509	1.14826	1.55807	1.02356	0.696537	0.778815	0.986236	1.14803	1.17753	1.2585	0.803985
	0.796797	0.198102	0.885714	1.24736	0.845501	0.83044	1.52679	0.904928	0.876404	0.839471	1.06224	1.10828	0.879066	1.35478	1.1337	0.695054	1.23404	1.0255	0.95171	0.960342	1.12588	1.34696	1.01711	0.698548	1.16612	0.668203	0.880269	0.5608	0.845577	0.631203	1.32303	0.722256	0.730662	0.588845	0.888315	1.16962	1.02818	1.15412	1.02144	1.58912	1.27087	1.21951	1.34182	0.7488	4.68761	0.489004	0.426966	0.37594	1.05591
	0.695082	0.600476	1.02689	0.5352	1.02538	0.596448	0.877419	0.630674	0.929766	0.882688	1.94489	2.07186	0.416667	0.794494	0.809601	0.949491	0.813397	0.967977	0.80542	0.807529	0.866082	1.02277	0.836364	0.738969	0.874286	0.664269	0.558462	0.431208	0.544	0.555867	0.870204	0.620471	0.562238	0.738532	0.760719	0.928074	1.08134	0.778711	1.06049	0.664634	0.97992	0.724908	0.752162	0.604243	0.523266	0.295802	0.239917	0.152192	0.901762
	2.30891		0.936411		1.18421	0.847393	1.19894		1.11299	1.20125	0.574118	0.585897		1.05291	1.38808	0.745989		1.14485		1.20748	2.41311		1.29377	1.58992	1.24301		1.31573	1.07763	1.25065	1.27307		1.28608	1.25321	0.658385	1.26936	1.04734	0.958062	1.0639	0.995138	0.806452				1.28998		1.64537	1.01256	0.957198
	0.394705	2.45191	1.81444	0.308734	0.656304	0.629295	0.483	0.298726	1.22449	0.771556	1.45382	1.41176	0.268694	0.368745	0.480863	2.15071	0.406977	0.687934	0.246517	0.738816	0.288563	1.42552	0.829736	0.430732	0.0931567	3.09439	0.443167	0.634669	0.493333	1.01191	0.36621	0.765997	1.05764	0.560902	0.544255	1.11807	1.2747	0.546875	1.03429	0.447059		0.384797	0.431123	0.598712	0.424088	1.09368	1.07101	0.785211	0.787362
	1.64428	0.148282	0.863299	1.26327	1.08635	0.841507	1.16084	1.58349	1.02484	1.04371	0.835652	0.731563	1.16567	1.44529	0.955577	0.872498	1.11111	1.11602	1.09697	1.17176	1.26367	0.98246	0.841772	1.30079	1.23164	0.470196	1.28353	1.19824	1.1336	1.01915	1.53685	1.14548	1.36877	0.921659	1.25809	1.15633	1.00235	1.07003	1.04241	0.923547	1.76014	1.2085	0.893617	1.04968	0.805882	1.14796	1.28927	1.36024	1.02991
	1.95119		0.503472		1.00571	1.11875	1.33333		0.782347	0.788371	0.91342	0.4625		1.35962	1.09438	0.397355		1.07774		0.837252	1.36043		1.05994	1.12586	0.961353		1.19623	1.47164	0.914798	0.989487		1.08927	0.938793	0.83651	1.11808	1.1454	0.973756	1.00471	0.987815	1.68051				1.07057		2.03156	1.72156	2.19737
	1.84361	0.112007	0.917442	1.7219		1.45769	1.44444	2.01633		1.05816			1.91009	1.39331	1.17784	0.795437	1.7453	1.37696	0.885288	1.05816	1.8579	0.703429	1.06667	1.47929			1.74325	2.01301	1.85616	1.37672	1.28086	1.45233	1.46732	1.5356	1.61687						1.94985	1.90569	1.6625	1.39071	0.677632				1.23925
	0.696273	0.234566	0.249311	0.969984	0.661932	0.39762	0.729614	0.574522	0.631544	0.533268	0.630303	0.464706	0.592248	1.02649	0.491996	0.257298	0.625455	0.439435	0.831696	0.389612	0.516185	1.1013	0.398701	0.503651	0.72	1.13464	0.457405	0.519299	1.11787	0.477219	0.870683	0.474034	0.443517	1.52174	0.543318	0.937685	1.08392	0.674847	1.10039	0.917722	0.662222	0.724441	0.635921	0.510812	0.697208	0.864979	0.894382	0.688136	0.655539
	2.08703	0.783429	1.03093	1.30097	1.13553	1.3534	1.55792	1.82204	1.08475	1.21648	0.549498	0.493077	1.58998	1.49196	1.70102	0.934292	1.09827	1.0816	0.945045	1.17543	1.68153	0.996039	1.29859	1.63743	1.26316	0.241854	1.52252	1.62735	1.25086	1.22697	1.49548	1.215	0.909173	1.99693	1.46615	1.11922	0.93287	0.923547	0.993548	1.19878	2.01934	1.24896	0.869014	1.55627	0.754272	1.30529	1.34758	1.5616	1.16944
	1.4569	0.13595	0.675166	1.38256	0.987842	0.928596	1.7389	1.51933	0.862903	1.01965	1.26957	0.816568	1.6991	1.24625	0.666401	0.437821	1.1505	1.12328	1.13752	0.973793	1.53065	0.778817	0.784314	1.14926	1.59207	0.22867	1.36409	0.780542	1.89873	0.92882	1.19469	1.05957	0.827837	1.01754	1.12629	1.03828	0.956522	1.0932	1.05342	1.15789	1.36424	1.31852	1.19029	1.06986	0.98416	0.901695	1.00708	0.961345	0.947653
	2.12938	0.226733	0.91984	1.84922	1.0683	1.42582	1.38192	1.61601	0.996016	1.23568	0.749296	0.44562	1.55152	1.41287	1.52203	0.84252	2.08974	1.7676	1.17655	1.20906	2.83058	0.719905	0.913433	1.71087	1.0449	0.366655	1.92214	2.00223	0.962779	1.63962	1.60525	1.83487	1.42582	1.01418	1.49671	1.3607	1.22066	1.22105	1.0206	1.03502	2.2192	1.78126	1.12189	1.57149	0.505389	1.28153	1.39162	1.57116	1.09569
	1.42992	0.147494	0.937039	0.959049	0.860647	0.809671	1.12877	0.959059	1.55766	0.956325	0.87395	0.692063	1.22136	0.867587	0.940118	0.488343	0.852632	1.03694	1.3015	0.88301	1.21564	0.86089	0.824798	1.16417	1.2663	0.428068	1.03349	1.20969	1.53644	0.966408	0.940409	1.216	1.1156	1.01869	0.837244	1.31343	0.98524	1.13269	0.994314	0.629969	1.39809	1.02795	0.990585	0.88498	1.47433	1.9337	1.47633	1.27561	0.91383
	0.811983	1.5342	0.57519	0.984074	1.11417	0.863917	1.33846	1.2484	0.887255	0.837238	1.25419	0.850112	1.14564	1.04499	0.977932	0.504691	1.25364	1.20214	1.03896	0.838873	1.14414	0.618455	1.39041	0.95841	1.21387	0.40383	1.1687	0.896968	0.74359	0.790951	0.996508	0.967125	0.775942	1.46667	1.0639	0.807425	0.906077	1.11111	0.955656	0.845528	1.17836	1.14717	0.887426	0.937164	1.04465	0.84507	0.794872	0.7875	1.18675
	1.42465	0.183135	0.741354	1.01367	1.17933	1.03669	0.89295	0.990126	0.975806	1.10196	0.853913	0.715976	1.57875	1.01677	1.52178	0.705449	1.07023	0.980054	1.04814	1.06413	1.24605	0.900013	0.848039	1.27346	1.38244	0.43754	0.998931	0.779737	0.893309	0.855193	1.00917	0.899433	0.763568	1.23509	0.906161	0.933014	0.979405	0.982368	0.9597	1.36842	0.974556	0.990138	0.668817	1.15205	0.489669	1.04633	1.06132	1.1563	0.864348
	1.43858	0.121913	0.646542	0.969786	1.00329	0.657431	1.38605	0.944701	1.15254	0.956377	0.665119	0.778626	1.19357	0.957587	1.0126	0.582167	0.983278	0.949682	0.921775	1.04349	1.48981	0.886574	0.79185	1.0766	1.15719	0.342399	1.06525	0.891169	1.2	0.912555	1.15742	0.862753	0.938787	0.763786	0.939093	0.889952	1.14934	1.02236	1.03641	0.778878	0.898253	0.908586	0.803365	0.912276	1.12843	0.736612	0.858783	0.642361	0.810386
	0.967602	0.188617	0.898579	0.908039	0.805237	0.790161	1.45024	0.886048	0.957447	0.992592	1.10762	1.08333	0.628828	1.34925	0.819932	0.733423	1.03191	1.15776	1.04429	1.01391	1.07785	1.10182	1.19362	0.955156	1.2906	0.679025	0.92874	1.01106	1.42	0.85731	1.43146	0.940677	0.789762	1.13368	1.01794	1.15452	1.14381	0.889593	0.950096	0.641107	1.6521	1.02887	0.84405	0.823785	0.955932	0.968421	0.918552	0.936968	0.767694
	1.11542	1.33568	0.816788	1.42553	1.20236	1.04979	1.25954	1.72076	1.06427	1.02487	1.5443	1.28118	1.06393	1.46532	1.10074	0.903788	1.72385	1.25014	1.0847	1.08998	1.20399	0.618955	0.980263	1.27975	1.37247	0.194992	1.286	1.04254	1.35192	1.01449	1.18661	1.17964	1.06471	1.42347	1.40117	1.10553	1.02564	1.40271	1.04483	0.674419	1.0349	1.52798	1.04446	1.14068	0.471028	0.574113	0.683544	0.584013	1.27049
	0.643372	0.119734	0.920748	0.745951	0.84808	0.440601	0.688421	0.503073	0.804054	0.746325	1.28331	1.24696	0.597817	0.789941	0.327948	0.561001	1.07027	0.555762	1.0524	0.640058	0.66375	0.998126	0.756637	0.57149	1.00328	0.99316	0.506597	0.531987	1.19907	0.553269	0.821646	0.57411	0.547537	1.37692	0.615835	1.15844	1.06329	0.668852	1.04671	0.449158	0.691671	0.737119	1.03924	0.461604	1.09396	0.682253	0.613687	0.584874	0.716988
	1.05176	1.21439	0.764813	0.609067	0.786765	0.693038	0.82153	0.567675	0.976744	0.84555	1.20159	0.841237	0.367492	0.741483	0.668678	0.931136	0.868805	0.740156	0.759416	0.900853	0.985052	1.0157	0.773684	0.852145	0.831346	1.20815	0.686111	1.41999	0.746269	0.987058	0.742175	0.949756	1.04154	0.397648	0.793308	1.03743	0.960829	0.959538	1.02037	0.795181	0.80109	0.720743	0.762428	0.816094	0.40733	1.33624	1.37084	1.40823	0.842262
	1.5577	0.174377	0.745794	1.01432	1.0798	0.919056	1.16964	1.27339	0.891386	0.964846	0.746888	0.687898	1.32009	1.20522	0.988474	0.494872	1.07599	0.900855	1.08558	0.890624	1.7401	0.983417	0.811736	1.14811	1.08795	0.425542	1.33451	0.92673	1.13643	0.924705	1.23507	1.02962	0.968805	1.28287	1.26957	1.26076	1.04397	1.29749	1.06803	0.706949	1.71721	1.15775	1.08327	1.03737	0.954639	0.858991	1.0437	0.981203	0.909011
	1.00068	1.77102	0.952162	1.1252	1.10638	1.15745	1.49091	1.20471	1.06842	0.933843	0.638843	0.698073	1.41151	1.36251	1.15245	0.667802	1.00948	1.26373	1.29347	0.910893	1.29642	0.703597	1.42424	1.16855	1.16981		1.27434	1.12129	1.60645	0.927304	1.28284	1.19474	1.01071	1.5625	1.27527	0.798969	0.923246	0.662474	0.949153	0.826087	1.23709	1.17429	0.998169	1.12637	0.45465	0.998966	0.946309	1.11149	1.00832
	1.54133	1.66599	0.385449	1.08657	1.13557	0.721599	1.29452	1.70969	0.869359	0.875381	0.936937	0.765873	1.23957	1.10781	1.17059	0.271111	0.988095	0.799335	0.949954	0.957027	1.30774	0.573764	0.913738	1.14518	1.22569		1.28356	0.967212	0.912189	0.836886	0.986919	0.954668	0.879671	0.867439	0.927558	0.770335	0.878613	1.04115	0.966312	0.775623	1.28221	1.25888		0.953625	0.523768	1.17559	1.41648	1.55008	1.10676
	1.07659	0.261495	0.705222	0.91354	0.795356	0.862622	0.89798	0.947798	0.865455	0.923406	0.754991	0.75709	1.05336	0.791234	0.942784	0.498029	0.722338	1.02721	1.26026	0.865976	0.992337	0.707348	0.654167	0.923566	1.01887	0.643781	1.20327	1.0582	1.23288	0.844177	0.975367	1.05701	1.09716	0.986068	1.09082	1.19816	1.01535	1.05128	1.04798	0.765677	0.94985	1.00134	1.16143	0.85299	0.659689	1.11087	1.10079	1.1709	0.95369
	1.83888	0.521449	0.864345	0.590176	1.05649	0.927111	1.02022	0.692353	0.848297	1.04661	0.513222	0.306161	0.620939	1.12271	0.906388	0.636241	0.851064	0.94798	0.829922	1.03251	1.61987	1.29605	0.993333	1.2209	0.950943		0.894785	1.60177	1.02508	1.23378	0.893268	1.33243	1.16132	1.2876	1.01496	0.947075	0.997732	1.04478	1.03947	0.71769	1.53444	0.789791	0.880636	1.15816	0.710907	1.28322	1.15084	1.57655	0.829026
	1.70306	0.148782	1.09206	1.08297	1.05592	1.22819	1.20161	1.11111	1.19718	1.27668	1.0601	1.01107	1.47223	1.58393	1.3872	0.792644	0.965986	1.5303	1.40965	1.21078	1.67241	0.843242	0.900398	1.48022	1.43182	0.54507	1.45328	1.49152	1.30909	1.20386	1.34636	1.40995	1.15742	1.80272	1.32473	1.19328	0.955368	1.24818	0.99334	0.804348	1.75622	1.02853	1.01143	1.21245	4.32105	1.09051	1.16782	1.29391	0.767257
	1.53625	0.455294	0.714855	1.30862	1.05571	0.938577	1.40326	1.3514	0.962733	1.04258	0.56	0.80236	1.36065	1.37405	1.30622	0.652291	0.962963	1.36256	1.40397	1.06302	1.68674	0.809635	0.924051	1.32858	1.28814	0.531773	1.68717	1.1891	1.4413	0.939024	1.60018	1.17008	1.18862	1.6129	1.22998	1.27543	0.976526	1.01401	0.997172	1.08869	1.18205	1.35541	0.966834	1.04977	0.314706	1.04071	1.11376	1.11211	1.17173
	0.774831	0.0963173	0.629285	0.948547	0.911466	0.891095	0.90303	0.968421	0.843636	0.837517	1.27223	1.418	1.11833	1.26413	0.657434	0.506248	1.03967	0.797304	1.1323	0.800691	0.920119	1.2154	1.18333	0.617519	0.950943	0.505203	0.569474	0.640309	2.38356	0.621065	1.09697	0.645115	0.68062	0.839009	0.742385	0.880184	1.14286	0.698718	0.955854	1.55776	0.839072	0.83481	1.07813	0.598165	0.453947	0.65662	0.543601	0.598985	1.15451
	0.939319	0.229617	1.04715	0.761612	1.66967	1.00649	0.713706	0.617798	1.11577	0.998794	0.776156	1.24855	0.635898	0.934692	1.30628	0.707457	0.65394	1.02727	0.969501	0.985553	0.929699	1.12596	0.616371	0.919274	1.39506	1.0263	1.11657		1.12651	0.913845	0.913237	0.835849	0.783306	1.08192	1.00462	1.31119	0.97006	0.903509	1.00547	1.33913	0.415309	0.759853	0.774576	0.998895	0.962275	0.741758	0.924658	1.0635	0.686949
	2.02951	0.452167	0.641078	1.06573	0.904854	1.05074	1.00565	1.34486	0.953771	0.794979	0.174029	0.229412	1.65411	0.795474	1.21174	0.640402	1.21197	0.80579	0.885593	0.749805	1.94113	0.465683	1.07772	1.30345	1.31414	0.226054	1.3664	2.13099	1.18809	1.4995	1.02527	1.6278	1.25257	0.76259	1.23788	0.820937	1.05855	1.18945	1.0463	0.787879	1.52551	1.24691	0.99072	1.4397	1.05413	1.46728	1.47895	1.7457	1.03369
	0.730446	0.142292	0.737332	0.889976	1.22131	0.748473	0.631016	0.575683	1.37569	0.688587	0.719454	0.609375	0.741168	1.1636	0.975248	0.659317	0.852381	0.673411	0.843197	0.748045	0.506808	1.19933	0.594495	0.651409	1.68018	0.660147	0.703981	0.725689	0.864078	0.59531	0.880951	0.701408	0.641456	1.30088	0.784536	1.78824	1.24582	0.428866	0.436297	0.386626	0.71277	0.775923	0.791161	0.668945	0.853198	1.49004	1.03678	1.85075	0.544056
	0.972617	0.505952	0.820777	0.82697	0.80889	0.483925	0.988417	0.688549	0.856329	0.669025	1.0699	0.910885	0.218384	0.949495	0.421163	0.660263	1.01111	0.518271	0.906138	0.672902	0.659916	1.21219	0.554331	0.592492	1.04443	0.824386	0.379061	0.623965	0.981567	0.617274	0.914966	0.615287	0.651226	0.960577	0.679528	1.06289	1.13769	0.647736	0.978406	0.838798	0.736059	0.759251	0.937059	0.524856	0.796875	1.12958	1.29896	1.21343	0.791529
	0.650426	0.411572	0.481694	1.93816	0.808511	0.84796	1.61455	1.3921	0.778947	0.594405	1.15702	1.05782	1.42498	1.52637	0.395682	0.470187	1.30806	0.618535	0.79317	0.538087	0.369937	0.692788	1.13636	0.542172	0.77187		0.834424	0.464151	0.977419	0.664025	1.36734	0.537319	0.67934	2.23214	0.702425	0.798969	1.06579	0.746331	1.02944	1.58385	0.926927	1.45153		0.636718	0.990999	0.715615	0.767338	0.70669	0.992362
	0.617453	1.16709	0.891998	0.993965	0.691552	0.880984	0.832061	0.603553	0.910026	0.818794	1.173	1.19239	0.750608	0.711223	0.732286	1.13035	0.878661	1.05702	0.850866	0.902592	0.535678	0.724795	1.03947	0.668642	0.963563	0.467577	0.797525	0.624829	1.06969	0.761296	0.664438	0.663919	0.736603	1.30141	0.791053	0.909548	1.03679	0.986425	0.995425	1.30233	0.395129	0.977077	0.743074	0.737713	0.409813	0.73904	0.672037	0.606852	0.69892
	0.71063	0.458692	1.12427	0.732	0.762763	0.492446	0.583929	0.474974	0.938617	0.830087	0.841849	1.74566	0.667826	0.671815	0.560444	0.828832	0.735632	0.361533	0.819936	0.822756	0.712685	1.4067	0.694071	0.585319	0.839506	2.71877	0.296747		0.578199	0.896855	0.633867	0.668322	0.831424	1.99396	0.815482	0.933566	1.04591	0.713158	0.961679	0.649565	0.280374	0.58358	0.96381	0.589663	1.26241	1.23626	1.29452	0.816727	0.786841
	0.210303	2.73903	1.88434	0.307496	0.528302	0.448404	0.447257	0.318053	1.06818		1.75732	1.38784	0.405003	0.313084	0.375531	3.39185	0.558511	0.842349	0.29213	0.532597	0.214691	1.24009	0.658228		0.0843511	2.87347	0.282048	0.350679	0.893724	0.481828	0.459322	0.520749	0.522339	0.354185	0.271717	0.87033	1.34773	0.391489	1.02422	0.916968		0.326192	0.268703	0.482602	0.3531	0.358145	0.343434	0.233562	0.7565
	0.214615	1.84744	1.34381	0.370053	0.733981	0.529916	0.683616	0.287898	1.10949	0.546106	1.49933	2.15882	0.29701	0.452567	0.409936	2.47703	0.38404	0.561911	0.514588	0.585236	0.290535	1.41463	0.751295	0.361887	0.486911	3.47548	0.278661	0.505065	0.865204	0.696045	0.396249	0.562343	0.685218	0.291367	0.532841	0.980716	1.34426	0.594724	1.0537	0.565455	0.0863921	0.358421	0.496363	0.528403	0.982569	1.07463	0.916951	0.61512	0.713291
	0.787637	0.322516	0.773036	0.94986	1.06116	0.829482	0.765152	0.735491	1.03872	0.854964	0.704846	0.592784	0.656618	1.06623	1.73847	0.644138	0.711359	0.874416	0.965116	0.884353	0.918513	1.11848	0.589109	0.858319	0.70793	1.07444	0.881383	1.49911	0.960748	0.852618	1.13071	0.850385	0.76464	0.628137	0.849594	0.992874	1.03248	0.920273	0.983051	0.953678	0.835845	0.751868	0.600248	0.955391	0.909348	1.10797	1.15892	1.21053	0.810576
	0.855362	0.623173	0.665204	0.749568	0.948775	0.941679	1.02888	0.728909	1.10914	0.865107	0.833333	0.773784	0.899695	1.50302	0.91242	0.718678	0.905526	1.42537	0.858527	0.78319	1.13618	0.508159	0.77957	0.988201	0.393939	0.172583	1.26987	0.91498	0.978947	0.88184	0.967311	1.00655	1.08058	1.23077	1.13272	0.789773	0.826374	0.731235	1.32369	1.07965	1.11257	0.836311	0.690464	1.0618	0.715153	0.812933	1.03721	1.86117	0.698127
	0.677816	0.166788	0.588385	1.34682	1.06441	1.0169	1.22078	1.4726	1.10429	1.0442	0.754875	0.816817	1.80342	1.19066	0.520157		1.22018	1.35254	1.12075	1.1487	1.26914	0.723867	0.822642	1.29934	1.55275	0.238013	1.46334		1.33499	1.07095	1.23403	1.28825	1.20459	1.14711	1.10138	2.03016	0.897716	1.26415	1.0116	1.03382	1.86022	1.31538	1.01702	1.16496	1.20533	1.02687	1	0.921305	1
	0.698162	1.32468	0.774194	0.558978	0.825893	0.545523	0.77027	0.606456	0.793103	0.706576	1.43434	1.42742	0.664166	0.707173	0.526366	0.718548	0.924025	0.587768	0.73929	0.716885	0.856268	1.11218	0.698492	0.593855	0.42616	1.02487	0.521005	0.579221	0.718381	0.578914	0.882705	0.647768	0.50259	0.945607	0.658891	0.96875	1.12644	0.945545	1.07024	0.906475	0.88052	0.679449	0.766225	0.607774	1.82459	0.490566	0.702703	0.481967	0.756082
	0.530332	2.13168	0.490378	0.804802	0.92623	0.51207	0.55615	0.468049	1.29282	0.576267	1.55631	1.44271	0.550469	0.554192	0.407178	0.388348	0.57619	0.531294	0.697669	0.545606	0.426494	1.69555	1.10092	0.434958	1.20721	2.2949	0.272224	0.916302	0.669903	0.794614	0.464777	0.68951	0.798382	0.973451	0.508136	1.01961	0.870013	1.2701	0.817599	0.638298	0.391356	0.591416	0.769873	0.445303	1.00509	0.656042	0.227816	0.357214	0.888578
	1.76521	0.327887	0.799753	1.40379	0.800839	1.00447	1.93249	2.09188	0.761364	0.847125	0.395696	0.216771	1.41041	1.83801	1.02586	0.448414	1.10638	0.907441	1.12696	0.805367	1.44389	0.605164	1.09367	1.19239	1.03817	0.159112	1.32236	1.66613	1.33054	1.10294	1.23474	1.32909	1.09965	1.69163	0.836402	0.962637	1.05	1.08511	1.01883	1.05415	2.0384	1.38903	1.06435	1.18331	0.540081	1.27077	1.16274	1.63699	1.33543
	1.32461	0.047486	0.794035	0.804218	1.1029	0.690033	0.939759	0.766844	0.971246	0.965683	0.591484	0.593361	1.13608	1.00242	0.816941	0.594861	1.41899	1.19221	1.1355	1.09581	1.71222	0.702249	1.01916	1.27195	1.19134	0.406935	1.31931	1.1805	0.970732	1.05126	1.10306	1.1366	1.01493	0.937186	0.952824	1.09259	0.985714	1.09402	1.08244	0.903846	1.17922	1.03793	0.75163	1.01989	0.572806	1.225	1.28665	1.41915	0.879748
	1.15184	0.35134	0.766869	0.791382	0.589777	0.627211	1.35327	0.775211	0.898741	1.01471	0.894424	0.895391	0.711007	1.36992	0.869032	0.689849	0.879747	0.94789	0.939799	0.981239	1.42926	0.971301	0.846923	1.13038	0.836954	0.623535	1.07095	1.19568	1.43093	0.871381	1.14927	0.959512	0.841916	0.961491	0.956988	1.23507	0.982374	0.92071	0.963063	0.759623	0.832104	1.00176	0.884638	0.836389	0.689494	1.21275	1.24169	1.67767	0.773873
	1.51251	0.365662	1.24545	0.942438	1.02564	1.19911	1.30411	1.36654	1.2741	1.13761	0.87395	0.857143	1.34778	1.12104	1.01893	0.652276	1.05789	1.05047	0.807697	1.08662	1.68434	1.13233	1.15364	1.31188	1.27717	0.443553	1.42973	1.44468	1.11079	1.25911	1.2413	1.42055	1.12884	1.04673	1.22451	1.17612	0.95572	0.964401	0.992689	0.892966	2.07507	1.16476	1.21315	1.19392	2.60014	1.43831	1.37391	1.24098	1.20356
	0.904463	1.97893	1.02428	0.938214	1.04179	0.67766	1.63457	1.35714	0.897436	0.986935	1.29469	1.67887	0.562286	1.20841		0.996046	0.85342	0.906326	0.801976	1.02337	0.8722	1.24291		0.895085	1.19118	0.222131	0.692213	0.617918	1.12843	0.675142	1.31728	0.702913	0.715997	1.38391	0.852317	1.11005	1.03059	0.860399	1.07918	0.734328	1.04267	1.22479	1.23347	0.685589	0.564103	0.589133	0.61336	0.528996	1.26155
	0.505765	1.60116	0.892629	0.686624	0.776074	1.03342	0.578322	0.552846	0.983834	0.902418	1.75214	1.71179	0.856072	0.656015	0.837157	0.958298	0.404332	0.677175	0.920763	0.920471	0.507943	1.21823	1.09605	0.538605	0.801382	1.96382	0.702461	0.759087	0.813793	0.917732	0.600872	0.803398	1.24196	1	0.689342	0.94382	1.19808	0.728653	0.997235	1.00513	0.173136	0.653634	0.597849	0.796332	3.14668	0.825964	0.680851	0.569405	1.00857
	0.251912		1.73685		0.823684	0.538149	0.960212		1.54991	0.931228	1.45882	1.64103		1.05811	0.314216	3.22334		0.485148		0.957934	0.422724		0.658754	0.456928	0.11914		0.319293	0.694664	0.832041	0.718934		0.616294	0.916914	0.393789	0.666419	1.39645	1.13886	0.728435	1.01135	0.825806				0.540822		0.876652	0.564251	0.505837
	1.06907		1.47442			0.656985	0.8			0.870529	1.54354	1.09325		0.606762	0.403324	1.13495		1.79729		0.904205	0.884581		1.04437	0.842594	1.25581		0.605864	0.704755	0.89697	0.671516		0.790409	0.763644	0.747392	0.805946	1.15723	1.01398	0.962733	1.0189	0.652941				0.693063
	1.03577	0.589257	1.21846	0.9264	0.943689	1.04588	1.08475	1.26005	0.856448	1.07471	0.866131	0.805882	1.20615	0.924282	1.06375	0.935199	1.02244	1.24447	1.09535	1.07913	1.2045	1.00524	0.994819	1.18128	1.34555	0.348482	1.13977	0.733741	0.877743	0.889966	1.08609	0.948902	0.864459	1.2446	1.24736	0.738292	1.19672	1.13189	0.990741	0.751515	0.915398	1.09257	1.00602	1.04434	0.622936	0.495982	0.425484	0.618557	0.911739
	1.27307	0.877915	0.601995	0.911246	0.769716	0.899374	0.723894	0.804489	1.05068	0.880283	0.9437	0.888579	1.08242	0.723618	0.887029	0.379962	1.14557	1.17601	1.38145	0.985031	0.967391	0.818027	0.872428	1.05703	1.05907	0.629347	1.14564		1.24615	0.910543	0.82918	1.08304	1.01413	0.89717	0.998618	1.11011	0.976096	1.00493	1.01071	0.588406	0.824432	0.979024	1.08491	0.89168	1.21556	1.4026	1.35423	1.49541	0.843943
	0.645032	0.360989	0.730144	1.14607	1.1386	0.856442	0.983433	0.948084	0.950959	0.948914	1.58304	1.33645	0.749705	1.06646	1.10593	0.716859	0.765661	0.859901	0.868849	0.977827	0.888466	1.25005	0.662698	0.778968	0.862302	0.508469	0.893468	0.612892	1.34737	0.742075	0.979916	0.711966	0.720163	1.05571	0.940021	0.905983	1.05536	0.936768	1.01323	1.01456	0.511198	0.863836	0.840875	0.893645	0.909605	0.42915	0.481283	0.45677	0.731138
	2.48833	0.130974	0.561175	1.70609	1.00229	1.15378	1.19658	1.57689	0.612277	0.798212	0.462243	0.416022	1.71762	1.35411	1.20771	0.477427	1.46099	0.865464	1.27897	0.796688	1.95091	0.762039	0.838196	1.32348	1.37669	0.227958	1.45858	2.30508	1.30725	1.43026	1.28053	1.58209	1.5742	1.19651	1.51657	1.21824	0.955005	1.05977	1.01131	1.22884	1.68968	1.43669	1.37737	1.39052	0.485453	2.6945	3.06195	3.64626	1.02417
	0.658894	0.169608	0.634052	1.5078	0.785276	1.04989	0.818182	0.857786	1.29792	0.848549	1.1453	1.1441	1.07009	0.996241	1.12886	0.357231	0.779783	0.728673	0.921925	0.826841	0.593342	0.903734	0.661017	0.635133	0.863558	0.581595	0.7434	0.673263	1.41149	0.798915	0.88562	0.69191	0.940695	1.2	0.800038	0.903371	1.11405	0.777989	0.943779	1.27692	0.516328	0.903316	1.20387	0.798783	0.846939	0.936971	1.01114	0.971671	1.04741
	0.327744	3.59257	2.32408	0.292072	0.732601	0.735776	0.552352	0.347054	1.20339	0.930949	1.76471	1.66923	0.277732	0.409432	0.510429	3.10803	0.578035	0.810955	0.281515	0.893576	0.363338	1.50026	1.55477	0.430116	0.147368	3.97758	0.360063	0.593524	0.721649	1.00561	0.401734	0.787315	1.15566	0.482335	0.715846	1.09976	1.27778	0.336391	1.06544	0.733945		0.406883	0.425822	0.57359	0.279316	1.06796	0.872891	0.592	0.963488
	0.606288	1.52491	0.475154	0.840923	0.651489	0.551348	0.944606	0.504716	0.996016	0.803657	1.04977	1.44621	0.277931	0.700157	0.737878	0.655431	0.576923	0.619387	0.567679	0.678007	0.732066	1.04238	0.925373	0.630803	1.23265	2.25957	0.522731	0.637179	0.863524	0.779053	0.614461	0.660792	0.839086	0.605674	0.712273	1.19062	1.05634	1.00351	0.975655	0.824903	0.076815	0.473845	0.665312	0.627423	1.37964	1.31532	1.29581	1.40481	0.966507
	0.330686	0.582345	0.773579	0.504104	0.480138	0.364633	0.4595	0.361073	0.946939	0.533594	2.08835	2.04334	0.331142	0.451273	0.315184	0.593206	0.534884	0.688785	0.564524	0.525337	0.290626	1.21543	0.618705	0.316919	0.15585	2.61954	0.224358	0.263776	0.67	0.532383	0.370271	0.442743	0.389366	0.692481	0.574783	1.08434	1.26988	0.651042	1.05143	0.55418	0.165539	0.41354	0.499008	0.389784	0.900763	0.514161	0.523865	0.359155	0.689741
	1.55275	0.182063	0.653222	1.38978	1.1505	0.648912	1.46849	1.66022	0.905482	0.896205	0.680672	0.965079	1.24097	1.5922	0.749612	0.612064	1.26842	0.795176	1.19204	0.808774	1.2581	0.993811	0.679245	1.23463	1.31522	0.402106	1.00552	0.889847	1.44023	0.835639	1.42982	0.958593	0.936476	0.702804	0.910526	1.15821	0.964945	1.11003	0.991064	0.850153	2.15673	1.2693	1.00725	0.923613	0.625452	1.16575	1.11884	0.949495	1.08805
	0.739758	0.270857	0.575205	0.855274	0.842491	0.703375	0.965099	0.89475	0.772881	0.662009	1.5495	1.23077	0.668858	1.21329	0.483027	0.509264	0.936416	0.628933	0.926986	0.613495	0.766621	1.16205	0.733216	0.461172	0.993421	0.936411	0.473478	0.479994	1.18213	0.532534	1.0522	0.53328	0.472032	1.95084	0.776951	1.02676	1.09954	0.770642	0.984332	1.737	0.935203	0.871931	1.05258	0.530625	0.272245	0.709817	0.654668	0.5856	0.933711
	1.135	1.11748	0.577483	1.12697	1.10016	1.04403	1.00369	1.43721	0.865526	1.04546	1.3325	1.67556	1.40502	1.00306	1.23157	0.538938	1.4509	1.18462	1.13661	1.05749	1.40012	1.15425	0.832298	1.20126	1.14711	0.356985	1.35989	0.783839	0.935185	0.965876	1.26268	1.03789	0.950927	1.47417	1.42276	1.00985	0.930845	1.10504	0.951421	0.851541	1.03003	1.21917	1.03908	1.07581	0.854283	0.282849	0.490022	0.493109	0.990018
	0.912245	0.122045	0.537383	0.746668	0.805281	0.571094	0.896321	0.755796	0.73955	0.735252	0.929021	0.657567	0.90028	1.00594	0.660075	0.624892	0.791519	0.746796	0.717086	0.788716	1.26148	0.848327	0.826498	0.714124	0.852361	0.562433	0.702051	0.619743	1.28249	0.563387	0.966121	0.646255	0.567194	0.855172	0.680387	1.14206	1.05613	0.863813	1.05005	1.104	1.29714	0.74241	0.935043	0.685703	2.30263	0.761905	0.829028	0.743295	0.631404
	0.165882	2.00161	2.23041	0.342971	0.586252	0.622007	0.324128	0.206208	1.1134	0.516812	1.62679	1.40758	0.340125	0.385417	0.730239	4.47015	0.535316	1.05976	0.27296	0.482472	0.30548	1.2299			0.275	3.34886		0.356034	0.619905	0.512886	0.309711	0.520734	0.459352	0.385728	0.697519	1.07328	1.21831	0.435874	0.946977	0.856448	0.0893032	0.321033	0.394123	0.623488	3.00751	0.427757	0.366285	0.203313	0.549112
	0.778851	0.264531	0.87984	0.976895	0.791171	0.829079	1.02679	0.764519	0.891386	0.795467	1.07054	0.949045	0.674447	1.05043	1.18303	1.08984	0.893617	0.824659	0.741453	0.799005	0.708085	1.09346	1.022	0.690809	0.451466	0.657341	0.604424	0.494672	0.893553	0.538486	0.978528	0.533407	0.484656	1.09163	0.769475	0.825316	1.08005	0.831541	1.05126	0.918429	0.889267	0.804595	0.829486	0.770053	0.748454	0.476067	0.466916	0.601504	0.654462
	1.12589	0.896715	1.06377	1.12812	1.34664	0.997142	1.4633	1.399	0.90604	1.02212	1.11405	1.21973	1.27762	1.35663	0.926929	0.50641	1.33728	1.02642	0.995929	0.934305	1.07561	0.980784	1.19403	1.0557	1.11877	0.309326	0.822555	1.02664	1.15461	0.884299	1.20286	0.906996	1.17845	1.90654	0.90208	0.987261	0.955319	0.844262	0.996303	0.782996	2.01821	1.30081	1.54653	0.931146	0.634742	0.551502	0.654676	0.886719	1.12686
	0.526618	1.26603	1.25577	0.633193	0.83964	0.645105	0.492096	0.367511	0.804124	0.639785	1.27001	1.66167	0.495627	0.540059	0.622044	0.961232	0.769231	0.553621	0.679883	1.17987	0.459699	1.74691	0.698718	0.696268	0.490018	2.07948	0.3435	0.932353	0.892734	0.879997	0.578549	0.72933	0.9916	0.441801	0.562121	0.772727	1.30332	0.762376	1.02698	0.90566	0.472122	0.420569	0.910814	0.671176	0.616046	1.11523	0.926882	0.976228	0.74691
	1.15782	0.209735	0.700343	1.06159	0.725953	1.11856	1.08257	1.0269	0.939597	0.98225	0.912436	1.00448	1.1021	1.00308	1.04687	0.430108	1.04142	0.995617	0.884824	0.913571	1.43138	1.0129	0.962687	0.985485	1.04981	0.43364	1.17242	0.964828	1.27092	0.96718	1.06597	1.00489	0.953134	1.39564	1.01609	0.942675	0.914894	1.11475	1.00924	0.987854	0.861912	1.08157	1.17179	0.932526	0.722066	0.927039	0.983213	1.00391	1.01619
	0.517907	1.83974	1.19065	0.728568	0.74606	0.735248	0.960217	0.462266	1.10725	0.791573	1.13934	1.26286	0.493632	0.96546	0.732079	1.44254	0.677395	0.770716	0.521079	0.812903	0.492447	1.01749	1.16861	0.583285	0.762527	0.682738	0.579861	0.547684	0.725905	0.720675	0.701665	0.648183	0.65235	1.43796	0.80973	1.15018	1.08427	0.734211	1.00194	0.814336	0.487124	0.753273	0.808438	0.656952	0.77951	0.869633	1.0411	1.0106	1.01628
	0.61923	0.710724	0.9344	0.916845	0.809437	0.470265	0.807339	0.762426	0.838926	0.685732	1.06255	1.5157	0.567133	0.799589	0.258806	0.615385	0.710059	0.548764	0.808947	0.651011	0.821235	1.07054	0.820896	0.513184	0.550192	1.58167	0.316553	0.594042	1.07801	0.635373	0.920512	0.562197	0.798518	1.55763	0.575811	1.04459	1.16809	0.72377	1.04251	0.733603	0.264795	0.788254	0.933474	0.510951	0.756808	1.08369	1.17986	1.14453	0.900643
	0.53375	0.626816	0.704555	0.859425	0.796834	0.484028	0.939759	0.801552	0.84345	0.64347	1.26582	1.21162	0.430612	0.66586	0.448698	0.716965	0.681564	0.630178	0.512099	0.582694	0.520564	0.722027	0.781609	0.487581	1.05415	0.451685	0.411878	0.395843	0.834146	0.507486	0.845081	0.545839	0.622812	0.528894	0.564494	1.28704	1.05	0.843305	1.09602	0.583974	0.631102	1.03259	0.828004	0.458906	0.952748	0.585417	0.654267	0.643642	0.754379
	1.36804	1.75622	0.921558	1.08885	1.08594	0.910795	1.25503	1.32532	0.960739	1.13741	1.40234	1.10538	1.6429	1.08148	1.13162	0.923676	2.05936	1.36291	0.99117	1.2061	1.39025	0.777377	1.07348	1.38915	1.17265	0.247219	1.39904	1.15899	0.750296	1.02168	1.23532	1.25405	0.993429	1.01299	1.37075	1.24551	0.982164	1.24473	0.960784	0.784884	1.07967	1.34333	1.0301	1.1348	2.44722	0.828866	0.866456	0.958949	1.28236
	0.640828	0.173053	0.674447	1.53454	0.847656	1.12443	0.979866	0.973968	1.0254	0.88252	0.927101	1.16989	1.00031	1.14286	0.90625	0.491002	0.844749	0.649551	0.89702	0.90625	0.666112	1.12094	0.798722	0.643522	0.533333	0.425483	0.787248	0.5973	1.01065	0.839298	0.880433	0.713651	0.88015	1.22294	0.80598	1	1.20333	0.78481	0.987522	1.2907	0.543405	0.893419	1.40579	0.765588	1.36658	0.989691	0.998948	1.13957	1.04143
	0.712888	0.764097	1.00841	0.817871	0.889105	0.530197	1.1367	0.809948	0.86507	0.745457	1.05145	1.212	0.521722	1.09631	0.419405	0.62373	0.758203	0.777396	0.984545	0.758539	0.611999	1.33348	0.93885	0.590402	0.794501	1.18559	0.311463	0.416793	1.13421	0.52256	1.18343	0.516333	0.49707	1.83147	0.529257	1.10679	1.09233	0.621236	0.967507	0.90173	1.23378	0.748175	1.51544	0.438466	48.8351	1.08608	0.95743	1.1332	0.847901
	1.51181	0.0953966	1.11323	1.1348	1.04531	0.846971	0.841703	1.33584	1.02837	1.10411	0.503704	0.53719	1.71509	0.761905	0.611146	0.810891	1.40741	1.4255	1.25471	1.09124	1.8002	0.806263	0.89781	1.48888	1.55636		1.4842	1.43468	0.705485	1.14029	1.36259	1.31298	1.07361	1.18695	1.0858	1.31683	0.938586	1.20249	1.01101	0.830189	1.65355	1.35951	0.915857	1.13917	0.946186	1.27252	1.29927	1.42655	1.12458
	1.12866	0.686729	0.851509	0.697738	0.99435	0.961061	0.875421	0.731603	1.02151	0.962709	0.658898	1.0283	0.629807	1.06374	1.42986	0.78171	0.605634	1.20049	0.993127	0.99532	1.33144	0.567774	1.06122	1.16352	0.972399	0.326931	1.32166	1.15693	0.809689	1.07646	0.824104	1.2057	1.17048	0.797183	1.23608	1.25	0.794492	0.875	0.770053	0.708108	1.02448	0.871509	0.828175	1.1084	0.674295	0.523316	0.519298	0.589577	0.874523
	0.973705	0.121159	0.547649	1.19817	0.937591	0.534557	0.89798	0.767347	0.763636	0.627244	0.519056	0.527744	0.74942	0.869666	0.475219	0.532836	1.05219	0.566054	0.706862	0.645234	0.748928	1.02197	0.469167	0.716691	0.988679	0.17776	0.592395	0.611764	1.5274	0.564338	0.985861	0.613572	0.616805	1.21827	0.864666	1.05069	1.01535	0.705128	1.08829	0.772277	1.125	0.986815	0.904203	0.625436	0.31878	0.858988	0.996602	1.00169	0.670402
	0.772566	0.309247	0.695116	1.21326	1.02574	0.838924	0.883978	0.867294	1.29524	1.15865	1.07071	0.83913	0.755942	1.17268	1.20558	0.813961	0.865285	0.976242	0.813002	1.06244	0.832122	0.861141	0.753799	0.937043	0.727273	0.428869	0.69567	0.926752	0.734322	0.981187	1.25339	1.05202	1.20394	0.622297	1.30374	0.887218	1	0.966292	0.879562	0.881657	0.53848	1.04749	1.24948	0.893873	0.487439	0.538226	0.56092	0.78903	0.783457
	1.88018	0.116806	0.543986	1.33191	0.984802	1.03165	1.4918	1.64485	1.01481	1.11379	0.600506	0.773333	1.61108	1.20519	1.22379	0.578885	1.09749	0.919888	1.09087	1.23581	1.66502	0.684332	1.01661	1.32847	1.14194	0.272985	1.61754	1.39434	1.37529	1.23859	1.19795	1.20256	1.10906	1.64038	1.01337	1.07512	0.929907	1.11642	1.02064	0.662687	1.46413	1.25766	1.60377	1.23631	0.66993	1.15641	1.22845	1.4276	0.994855
	1.4568	0.137612	0.665588	1.30762	1.08716	1.12124	1.29588	1.42932	1.07087	1.10343	0.99118	1	1.483	1.22683	1.1171	0.587315	1.44776	1.25611	0.877914	1.10238	1.82394	0.843001	0.953846	1.247	1.28931	0.218429	1.60932	0.998687	1.44533	1.04436	1.05065	1.15843	0.906284	1.41825	1.49008	1.14989	0.933941	1.16867	1.02507	0.944625	1.3068	1.28191	1.15672	1.15358	0.851701	0.88049	0.969298	0.913043	1.00085
	1.39961	0.241257	0.449343	1.0603	1.00393	1.03095	1.33134	1.12624	0.976898	0.970829	1.01702	0.725	1.29862	1.15584	0.824765	0.284061	1.19617	1.06171	1.13091	0.916664	1.80653	0.958879	0.8125	1.05296	1.23263	0.591295	1.37649	1.04157	1.47482	1.00041	1.41387	1.04707	0.924618	1.29388	1.09098	1.19529	1.00239	1.12637	1.00938	1.2973	1.17651	1.10259	1.21257	1.08204	1.67354	0.912698	1.10504	1.23284	0.972358
	0.387152	1.22199	0.852225	0.655667	0.660777	0.551573	0.681115	0.441212	0.858537	0.615952	1.51703	1.73102	0.243432	0.608515	0.294228	0.750755	0.833856	0.61493	0.689964	0.611916	0.37753	0.995997	1.06189	0.436109	0.728597			0.47175	0.797267	0.489911	0.586617	0.401558	0.554567	0.732235	0.497737	0.780045	1.29426	0.575397	0.965583	0.774373	1.40011	0.585766		0.48524	7.19536	0.735931	0.837963	0.697389	0.927688
	1.02862	0.122427	0.644739	0.98013	1.2161	0.978034	1.07356	0.90939	0.869936	0.718459	1.3371	1.00467	1.12338	1.41577	0.787659	0.448802	1.00232	0.814418	1.03907	0.704783	0.888704	0.758026	0.780952	0.880427	1.04289	0.47283	1.05241	0.727897	1.27368	0.678299	0.970122	0.651739	0.538042	0.792479	0.84322	0.786325	1.0106	0.838407	0.956522	1.37379	0.84558	0.791962	1.01458	1.00992	1.2399	0.817814	0.973262	0.920065	0.708637
	1.92832	0.17477	0.759716	1.46007	0.852792	1.17984	1.2	1.50201	0.956522	1.09491	0.852512	0.646707	1.46429	1.17207	1.21619	0.696944	1.15789	1.32529	0.928487	0.970776	2.27215	0.887142	0.989091	1.36776	1.48	0.262141	1.62967	1.36359	0.688	1.23007	1.19612	1.3154	1.00505	1.33945	1.21413	1.22042	1.02871	1.15406	1.02647	0.963415	1.43474	1.32175	1.11395	1.22273	0.816506	1.09351	1.19338	1.17963	1.00508
	1.55858	0.441649	0.686431	1.06999	0.630682	0.639644	1.11588	1.27102	0.852349	0.933806	0.630303	0.49916	1.0493	1.01545	0.864105	0.612559	0.989091	0.882595	0.805895	0.895784	1.58735	0.884359	0.772727	1.26896	1.18667	0.100719	1.08677	1.46444	1.17871	1.1233	1.29328	1.14529	1.00817	1.2269	1.00702	1.15727	1.02564	0.92638	1.08687	0.670886	0.787407	1.11607	0.879938	0.972054	0.997382	1.29536	1.33933	1.71186	1.1046
	1.25756	0.134458	0.630395	0.930234	0.633975	0.755654	1.09038	1.04381	0.796813	0.844012	1.03099	0.837155	1.14173	0.990581	0.92887	0.378353	0.974359	1.07008	1.22957	0.778359	1.04065	0.841803	0.728358	1.02671	1.24082	0.508255	1.06976	1.14018	1.27543	0.872499	0.939186	1.06958	0.957642	1.12766	1.00208	1.47801	0.93662	1.08772	1.00936	0.707393	1.49415	1.01603	1.05891	0.817871	0.620359	1.26577	1.2982	1.41959	0.854067
	1.73712	0.11073	0.738847	1.33433	1.44658	0.893129	1.46356	1.67093	0.812749	0.997207	0.846948	0.623163	1.84208	1.60126	0.923456	0.585388	1.20513	1.16778	1.30876	0.934675	1.79298	0.590579	0.889552	1.50664	1.42857	0.360374	1.83066	1.4034	1.41439	1.11076	1.54994	1.27573	0.945988	1.29787	1.35793	1.31965	0.941315	1.0807	1.03371	1.03502	1.67026	1.38238	1.0772	1.23158	0.780838	1.23198	1.24551	1.31608	1.06938
	0.501636	1.47899	1.11024	0.582534	0.685864	0.798474	0.778707	0.502836	0.914163	0.786155	1.26392	1.49192	0.503666	0.651646	0.672743	0.981954	0.325967	0.680402	0.717025	0.794534	0.499118	0.701555	0.864	0.572473	0.646552		0.471991	0.544419	1.14135	0.681513	0.561765	0.526794	0.81865	0.901701	0.719888	0.900452	1.16647	0.520548	1.00928	0.91253	0.490478	0.38042	0.896631	0.652261	0.91585	1.01121	1.05895	0.993631	0.847167
	0.974654	0.169049	0.722482	0.712672	0.805471	0.489907	0.934426	0.812345	0.962963	0.965003	1.24557	1.10588	0.778353	1.11429	0.519827	0.597215	1.27577	0.913122	0.945453	0.949806	0.863442	1.10676	0.963455	0.905494	1.32903	0.451481	0.774285	0.679758	0.923077	0.690777	0.957052	0.769346	0.925073	0.481073	0.792706	1.16432	0.995327	0.919403	1.0394	0.704478	0.873523	0.998073	0.701607	0.678973	0.721678	0.651867	0.655172	0.654174	0.85209
	0.843402	0.299506	0.688283	0.831282	0.879285	0.764168	0.763419	0.458803	0.865672	0.742017	0.897527	0.82243	0.618064	0.918083	0.756808	0.631098	0.719258	0.87846	0.884252	0.73108	0.66849	0.989116	0.464286	0.725468	0.604966	0.825258	0.767341	0.781786	1.6	0.666585	0.84739	0.704648	0.844781	1.53203	0.683422	1.07265	1.06949	0.871194	1.05293	1.4466	0.748919	0.669206	0.890146	0.699578	1.86484	0.975709	1.08021	1.06688	0.489411
	0.982059	0.75	0.565738	0.569998	0.974046	0.504968	1.09396	0.795335	0.833724	0.634879	0.759471	0.49226	0.647826	0.981405	0.406349	0.774116	0.82	0.657375	0.812187	0.611665	1.04358	0.722245	0.845481	0.674499	1.14855		0.56161	1.14264	0.962733	0.784088	0.834346	0.844664	0.949122	0.556614	0.747583	0.989059	1.06792	0.943396	1.03379	0.540541	1.03887	0.599224	0.837171	0.661571	1.01217	1.18647	1.25052	1.27523	0.762908
	1.80184	0.152965	0.598554	1.05587	0.884375	0.917323	1.35021	1.44511	1.10417	1.0447	0.72967	0.671223	1.66667	1.13014	0.875172	0.572748	1.26108	1.13284	0.965517	0.991115	1.68225	0.629851	0.913076	1.22686	1.37643	0.32254	1.61567	1.27532	0.744966	1.11959	1.16079	1.16046	0.964587	1.07446	1.20829	1.03743	0.859708	1.00676	1.04015	0.577333	2.18528	1.1796	1.38955	1.18112	1.39726	1.07568	1.10744	1.07547	0.960857
	1.34657	0.0428195	0.582488	0.846717	0.936097	0.60426	1.125	0.932502	0.873469	0.874959	0.756627	0.823529	0.945768	1.30641	0.85319	0.476708	0.930233	0.839359	0.93708	0.922506	1.56406	0.940245	0.781775	0.967547	0.935982	0.344803	0.887127	0.751634	1.16667	0.813991	1.15612	0.799528	0.745961	0.766917	0.802572	0.978313	1.04578	0.96875	1.08	0.965944	1.38365	0.818172	0.768162	0.836359	0.629347	0.816993	0.933644	0.792254	0.800852
	1.44156	0.13489	0.633364	0.874727	0.864122	0.998786	1.02921	0.883428	1.10836	1.06668	0.871694	0.881517	1.22102	0.975845	0.921806	0.478834	0.950355	0.924414	0.941217	1.13226	1.60823	0.454703	0.666667	1.14031	1.15472		1.61336	1.05151	0.799373	1.09812	0.91678	1.09521	0.937094	1.1504	1.23744	1.0585	0.959184	1.14925	1.06391	0.679422	1.52879	0.837943	1.18266	1.18685	0.77661	1.0719	1.16201	1.12052	0.741451
	0.180553	2.64498	1.29693	0.295576	0.536364	0.514308	0.422338	0.327052	1.06107	0.569498	2.26364	2.30822	0.252129	0.27193	0.390563	2.09408	0.517483	0.577189	0.35254	0.571853	0.317417	1.2591	0.747368	0.263707	0.154545	3.97955	0.286962	0.258486	0.52901	0.524001	0.514031	0.464254	0.574702	0.425926	0.450612	1.34437	1.41147	0.477059	1.03717	1.09091		0.364468	0.39657	0.427044	0.616994	0.489596	0.363924	0.290872	0.526304
	0.896226	0.37488	0.589769	0.704768	0.887402	0.414209	0.854795	0.80303	0.937618	0.754511	1.47899	1.14286	0.740454	0.856214	0.320509	0.513507	0.9	0.872588	0.924162	0.776919	0.774286	0.884173	0.948787	0.748404	0.961957	0.104819	0.722376	0.535946	0.900875	0.567754	0.968984	0.617216	0.703928	0.568224	0.749966	0.937313	1.01845	1.13916	0.984565	0.892966	0.906157	0.862267	0.82914	0.556467	0.845264	0.79558	0.801932	0.733045	0.779184
	1.77662	0.122498	1.1516	0.903376	1.02901	1.22637	1.77978	1.84549	0.978328	1.24367		1.11848	1.62134	1.79903	1.06571	0.699514	0.93617	1.43354	1.41609	1.24085	1.64239	0.86466	1.18	1.5596	1.51698		1.75122	1.54146	1.34169	1.25755	1.53749	1.36013	1.16213	1.5409	1.18781	1.1532	0.92517	1.1194	1.02256	0.787004	1.71035	1.36675	1.11012	1.22159	0.701708	1.11547	1.22458	1.32248	1.04909
	0.485147	1.85672	0.94224	0.55375	0.737179	0.906512	0.502719	0.474734	1.05229	0.862103	1.88221	1.90335	0.618816	0.617997	0.648549	1.00608	0.629442	0.55376	0.594256	0.857505	0.565588	1.19982	1.05263	0.627032	0.888889	2.3437	0.463967	0.860757	0.937269	0.807606	0.525197	0.762425	0.974584	0.660194	0.631614	0.751295	1.17336	0.67079	0.947664	0.885017	0.175846	0.477316	0.871947	0.64709	1.66538	1.10754	0.969886	0.987342	1.08729
	0.857381	0.230112	1.02859	1.17988	0.932936	0.925436	1.1226	1.17756	1.00213	1.11439	1.10389	1.00935	0.809032	0.958269	1.15756	0.87054	1.03944	1.01223	0.954724	1.08312	0.856361	1.15655	0.59127	0.978809	1.12867	0.523275	0.960653	0.777589	1.41053	0.915887	1.10856	0.928884	0.875844	0.832869	0.990946	0.995726	0.942285	0.992974	1.02836	1.05825	1.04794	1.0552	0.848668	0.984246	0.940026	0.580972	0.573262	0.62969	0.837194
	1.80739	2.586	0.73853	1.27443	1.02711	1.0643	1.67123	1.92815	0.978622	0.917406	0.331532	0.342857	1.67968	1.24233	1.35939	0.75734	1.75	1.25636	1.05908	0.933385	1.59809	0.599101	1.5016	1.37986	1.25347		1.66287	1.71483	1.30537	1.23664	1.258	1.58345	1.10987	1.8018	1.18654	1.04306	0.880925	1.22222	0.987589	1.03601	1.38364	1.51744		1.33452	0.81206	1.35332	1.46453	1.61905	1.62119
	1.85377	0.538335	0.486693	1.07109	0.90312	1.01507	1.34317	1.5526	0.953545	0.858347	0.839723	0.42	1.5748	0.780388	1.22955	0.488389	1.12224	0.920973	1.0807	0.836265	2.25029	0.756941	1.08075	1.16533	1.12477	0.244505	1.33543	1.50028	0.814815	1.26079	1.15972	1.36765	1.17931	0.845038	1.09193	1.21675	0.911087	1.21849	0.967919	0.70028	1.69367	1.26891	0.878923	1.29688	1.0465	1.22367	1.36585	1.51302	1.07394
	0.584769	0.209885	0.678624	0.933469	0.862454	0.98325	0.583732	0.511016	0.889952	0.770383	0.828182	1.37193	1.08875	0.79	0.591745	0.614299	0.679245	0.609171	1.00953	0.773127	0.457871	0.992698	0.935897	0.522492	0.606474	1.15835	0.760283	0.595711	0.717145	0.953322	0.759016	0.604475	0.92631	1.43348	0.654559	0.966592	1.19626	0.647287	0.914855	1.50134	0.320014	0.684584	1.2275	0.755169	1.65104	0.734127	0.679912	0.691131	0.82139
	1.56304		0.694615		1.13684	1.4639	1.15119		0.764595	1.04796	1.13882	0.942308		1.08066	1.21714	0.525628		1.35074		1.04343	1.49483		0.902077	1.26157	1.13118		1.5929	0.99426	0.744186	1.00969		1.28188	1.01409	0.424845	1.34298	1.2071	0.978565	1.01917	0.946515	1.67742				1.19719		1.12996	1.10918	1.64202
	0.597759	0.10323	0.349231	0.89703	0.661184	0.366949	0.687442	0.595828	0.788983	0.445454	0.383053	0.363359	0.543881	0.848256	0.471604	0.442845	0.77592	0.378712	0.73808	0.380396	0.557792	1.08112	0.639233	0.410661	0.528428	0.675325	0.376451	0.408125	0.981132	0.425183	0.813831	0.419277	0.448147	1.21975	0.452162	1.06699	1.15173	0.677316	1.08683	0.877888	0.766016	0.678131	0.791448	0.435448	1.91919	0.92459	0.941447	0.732639	0.58565
	0.83816	0.66321	0.575839	0.740155	0.885106	0.539477	1.51273	1.0515	0.836842	0.708744	1.05785	1.04069	0.795748	0.938272	0.423776	0.547149	1.24171	0.81156	0.880209	0.755643	0.912199	1.28154	0.886364	0.785112	0.991424		0.594909	0.629235	0.970968	0.738839	0.972065	0.746626	0.785873	0.825893	0.762274	0.860825	0.984649	1.16562	1.00268	0.483851	0.987709	0.888794	0.73454	0.6311	0.540042	0.850052	0.847875	0.782161	0.869132
	1.24558	0.377603	0.967182	1.04291	0.701571	1.08265	1.43114	1.25286	0.963768	1.10831	1.84077	1.04339	1.4367	1.13208	1.29156	0.55192	1.21212	1.63659	1.18443	1.08045	1.5151	0.979605	1.07194	1.15596	1.17606	0.565574	1.39027	1.01088		0.996275	1.3578	1.14397	1.1598	1.06723	1.21297	1.07182	1.03704	0.927336	1.02852	0.777385	2.15619	1.22692	0.867275	1.05925	0.4047	0.823893	0.835498	0.811232	1.03668
	1.52711	0.262435	0.624379	0.84711	1.01136	1.38362	0.909871	0.986624	1.02013	0.999703	1.32424	1.0084	1.18698	1.31567	1.13447	0.506253	0.989091	1.05832	1.01368	0.910556	1.00124	0.734617	0.798701	1.27625	1.28667	0.230968	1.55303	1.28364	0.836502	0.954407	1.02538	1.02632	0.55222	1.01766	1.20802	1.29377	0.904429	1.05521	0.926641	1.1962	1.55778	0.932237	0.916132	1.14409	0.664049	1.14979	1.14157	1.34237	1.11968
	0.516319	0.175479	0.63615	0.876138	0.80943	0.770023	0.961832	0.601884	0.843188	0.707012	1.33333	1.463	0.513126	1.00378	0.696242	0.560499	0.564854	0.578079	0.810074	0.707461	0.586983	1.16252	0.505921	0.506915	0.672065	1.09274	0.471175	0.560587	1.33798	0.630639	0.815965	0.55984	0.450642	1.58498	0.561585	0.879397	1.14604	0.773756	1.02653	1.12209	0.681934	0.719629	0.992404	0.545301	0.92757	0.851775	0.918297	0.845024	0.734219
	0.232692	4.30174	1.18117	0.378431	0.650558	0.441746	0.617225	0.404434	1.04785	0.328945	1.20909	0.975439	0.256028	0.37	0.268946	1.45238	0.267925	0.641869	0.472367	0.37329	0.227398	1.2579	0.935897	0.214793	0.405451	3.65094	0.358294	0.300175	0.720627	0.443105	0.409372	0.410598	0.338673	1.13305	0.528322	0.832962	1.30374	0.554264	1.05797	0.80429	0.0508869	0.528187	0.458001	0.509932	0.620106	0.28373	0.225166	0.154434	0.770669
	1.07885	0.233315	0.493774	1.09937	0.893204	1.1075	1.88865	1.60782	0.836879	0.92612	1.12889	1.1157	1.08573	1.16717	1.20205	0.443326	0.915344	2.16425	1.20447	0.962747	0.946835	0.447718	1.09489	1.02697	1.21455	0.365508	1.27821	0.777884	1.29958	0.701749	1.05199	0.744235	0.609458	0.976929	0.78714	1.15842	0.975666	0.571963	0.965138	1.20755	1.37105	1.14099	0.831864	1.04306	0.992045	0.849885	0.841849	1.05841	1.10163
	0.491551	0.351897	0.540586	0.807065	0.696049	0.496403	0.604098	0.39237	0.874074	0.664332	0.977215	1.39608	0.519938	0.54026	0.535925	0.669698	0.902507	0.60275	0.530654	0.653848	0.483465	1.17311	0.280399	0.534485	0.572903	0.543028	0.38877	0.357588	0.750583	0.538105	0.727687	0.55415	0.591701	0.629338	0.606874	1.25822	1.10514	0.740299	1.09568	0.53791	0.6828	0.767155	0.852551	0.441857	2.93706	0.361251	0.340517	0.318228	0.540193
	1.1278	0.36217	0.838488	1.42247	1.10885	0.715054	1.32323	1.44103	1.09818	0.963252	1.07804	1.06289	1.39733	1.4579	0.62828	0.787218	1.06889	0.965931	0.837538	1.05873	1.37368	0.848146	0.883333	1.16327	1.23774	0.210827	1.22157	0.818621	2.08219	0.894322	1.74733	0.992231	1.0871	1.21517	1.16858	0.894009	0.998819	0.987179	0.871401	0.59736	1.03817	1.38241	1.37044	0.923902	0.392344	0.574812	0.602492	0.598985	1.25676
		0.162064		0.777003	0.957071		0.622248	0.606602	0.775258		0.560345	0.657074	0.718663	0.841808			0.869707		1.00711			1.0204	0.808333		0.778947	0.624875			1.14953		0.894123			0.978626		0.940659	1.07066	0.817757	0.914286	1.34963	0.899145	0.624792	1.0593		1.05708	1.07433	1.22899	1.38312	0.657039
	0.22691	2.74604	0.723321	0.270874	0.615132	0.427535	0.417674	0.356713	1.12712	0.52273	1.45096	1.78626	0.221508	0.252592	0.172967	1.56895	0.341137	0.499722	0.372758	0.426659	0.244335	1.2965	0.634439	0.213497	0.146488	3.81158	0.252556	0.201329	0.501132	0.438903	0.429959	0.385361	0.440659	0.986008	0.41344	1.02392	1.34767	0.414696	1.05509	0.963696		0.333192	0.495268	0.364807	0.616162	0.428415	0.390356	0.216319	0.493859
	1.5987	0.195122	0.529297	1.33745	0.914858	1.03332	1.26316	1.39905	0.851351	0.805779	0.403927	0.395142	1.28463	1.43491	0.801696	0.454402	0.983784	0.825743	1.00367	0.79342	1.04704	0.51624	0.876106	0.97427	0.911475	0.274198	1.10031	1.33055	0.967593	1.09495	1.50311	1.0234	1.0531	1.48927	0.979346	1.02857	0.897583	0.977049	0.978074	1.42761	1.17876	1.17641	1.21714	0.985279	0.93736	1.24336	1.29801	1.6437	1.04574
	0.204425	3.26525	1.16978	0.342487	0.576271	0.386613	0.60202	0.365881	1.05376	0.413614	1.69492	1.56132	0.272761	0.323929	0.341958	1.37945	0.461268	0.596566	0.464251	0.405234	0.179138	0.978635	0.688047	0.218494	0.146497	3.35085	0.283412	0.281729	0.696655	0.410143	0.367861	0.382379	0.379484	0.804695	0.44216	0.994048	0.963983	0.405303	0.686275	0.875676		0.497087	0.453491	0.426481	14.8596	0.254145	0.0790643	0.0605863	0.691862
	1.64458	0.136334	1.12559	0.956819	0.837971	0.765049	1.52607	1.11117	1	1.04632	0.318386	0.434722	0.568395	1.22687	1.01812	0.845278	0.925532	1.04366	0.827356	1.13327	1.63831	0.975857	0.867295	1.15075	1.13675	0.746111	0.692383	1.38259	1.22667	1.11783	1.0829	1.15318	0.922532	0.853886	0.937645	1.30029	1.04646	1.02262	1.08829	0.603953	1.22938	1.04722	0.661101	0.992423	0.411299	1.24842	1.24208	1.63543	0.869276
	1.21533	0.427232	0.588262	1.10336	1.03906	1.02858	1.2349	1.04498	0.872979	0.934739	1.21313	1.47527	1.16928	1.44339	0.878309	0.433012	1.29224	0.946423	1.27254	0.997283	1.00119	0.633635	0.958466	1.00012	1.09402	0.351401	1.31674	0.749551	1.03905	0.821382	1.17773	0.949315	0.846772	1.43939	1.02113	1.12575	0.94887	1.1308	1.01783	1.00581	0.907554	1.10851	1.11868	0.976405	0.604323	0.635052	0.584648	0.735632	1.14313
	0.699009		0.543673		0.855124	0.535458	0.972136		0.765854	0.730384	1.24871	1.86985		0.942887	0.387877	0.560534		0.710704		0.699239	0.784006		0.872964	0.687435	1.21311		0.572396	0.633915	0.799544	0.640724		0.640752	0.838816	0.480947	0.808857	0.9161	1.10526	1.05556	0.83174	0.421727				0.548713		0.20974	0.2	0.140092
	1.94363	0.134769	0.602571	0.823324	0.950382	0.939836	1.42143	0.897997	0.977099	0.973692	0.666667	0.443654	1.28814	1.0495	0.963208	0.598984	1.46875	1.058	1.01071	0.982411	1.88445	0.754078	0.858044	1.33209	1.06122	0.530507	1.47098	1.64581	1.05817	1.28853	0.95121	1.25842	1.01901	1.07634	1.15744	1.09973	0.919592	1.10672	1.03934	0.556458	1.57899	0.915977	1.18787	1.30477	7.06011	1.32336	1.39204	1.59341	0.85114
	2.27112	0.199113	0.900552	1.25627	0.978723	1.33135	2.0082	1.55552	0.955556	1.2714	0.621772	0.494118	1.76075	1.93766	1.62858	0.700763	1.41504	1.7606	1.38055	1.28203	2.10034	0.694843	0.956811	1.65855	0.729032	0.655215	1.74957	2.36172	1.14685	1.54817	1.78854	1.74226	1.80947	1.52208	1.37971	1.21127	0.92757	1.34328	1.02439	0.770149	2.02017	1.34958	1.07128	1.40851	1.06434	1.19879	1.28448	1.7615	1.0746
	0.992786	1.56496	0.80893	1.00183	0.706271	0.547141	1.16388	1.10201	0.823151	0.714458	0.966757	0.689614	0.643057	1.12638	0.44015	0.684031	0.925795	0.567847	0.86762	0.752339	0.770059	1.39014	0.719243	0.614078	1.16738	0.824271	0.482051	0.761579	1.16949	0.61425	1.25492	0.600658	0.652939	0.868966	0.568835	1.30362	1.08133	0.735409	1.03913	1.112	1.48434	0.976686	1.10974	0.573099	0.847368	1.22676	1.34317	1.39464	1.1128
	0.2507	2.77763	1.5278	0.390241	0.571901	0.743889	0.413636	0.378839	0.897494	0.649676	1.1932	1.27835	0.344308	0.397351	0.584538	1.82593	0.674115	0.56307	0.383121	0.679131	0.310646	1.07333	0.782178	0.354254	0.276209	4.08422	0.311505	0.653238	0.564486	0.742425	0.418043	0.661821	0.657437	0.775665	0.522718	1.06888	1.29698	0.687927	1.02944	0.768392		0.406676	0.445217	0.622741	0.815667	0.916246	0.823784	0.611111	0.860324
	1.52445	0.133671	0.471915	1.22439	0.811224	0.921135	1.28525	1.2298	0.708134	0.669808	1.19795	1.16998	1.02898	1.54924	0.621488	0.335855	0.907975	0.793009	1.03415	0.698659	0.942419	0.561474	0.867089	0.998828	0.532847	0.209448	1.3137	1.36674	1.13363	0.92015	1.06998	0.958767	0.834329	1.59149	0.832569	0.923077	1.1099	0.797357	0.89008	1.02295	1.47537	1.05493	1.07484	0.990251	0.852894	1.16704	1.21002	1.03183	1.00731
		1.79511		0.838741	0.939535		1.2887	1.26129	0.910236		0.68849	1.11942	0.443383	0.928571			0.95098		0.637272			1.04004	1.32489		1.7817	0.326865			0.970986		1.14142			0.714763		1.02128	0.937566	0.770543	1.03898	0.804598	0.946903	1.18762	1.27579		1.6575	0.906054	1.02314	0.888112	1.15017
	0.952699	0.209818	0.658013	0.842766	0.972887	1.15066	0.970684	0.472817	0.959315	0.840347	1.11382	1.31367	0.952691	1.36323	1.02661	0.516988	0.615702	0.945741	1.12863	0.864719	0.826257	0.813693	1.02073	0.834123	0.794118	0.444811	1.07538	0.835213	0.539683	0.936457	0.688706	0.820944	1.05952	1.27419	0.866751	0.968523	1.02074	0.89038	1.02448	1.1404	0.800314	0.689603	1.14593	0.956711	12.7454	1.07616	1.32936	1.16006	0.882252
	0.862413	0.17575	0.85443	1.087	0.806122	0.867429	1.00984	0.797357	0.875598	0.941218	0.0692527	0.195585	0.68825	1.5066	1.39559	0.638438	0.703476	0.930123	0.96178	0.974961	0.981416	1.04193	0.727848	0.884576	0.671533	0.747022	0.887895	1.14925	1.25698	0.881538	1.09027	0.922888	0.829763	0.538723	0.862083	1.09677	1.04244	1.30396	0.886506	0.852459	0.809587	0.818575	1.0753	0.990548	0.574807	0.851016	0.871122	1.55109	0.864515
	0.528391	0.322916	0.845243	0.850008	1.07961	0.825415	0.774011	0.655869	1.08516	0.89926	0.850067	1.37059	0.645198	0.844212	0.963002	0.714025	0.972569	0.777734	0.902803	0.85002	0.80292	1.12816	0.606218	0.823292	1.00524	0.708724	0.750684	0.461824	1.06583	0.749014	0.940628	0.690112	0.814729	0.620863	0.941205	0.964187	1.04918	1.04077	0.985185	1.07879	0.676365	0.764455	0.60923	0.863274	0.933028	0.580941	0.516496	0.553265	0.643674
	1.06973	0.335497	0.494201	0.888199	1.09434	0.946433	0.898734	1.12951	1.01136	0.812495	0.872684	0.939203	1.44185	0.791277	1.50251	0.492675	1.10106	0.753094	1.24229	0.842831	1.66243	0.63428	0.946835	1.05126	1.26336	0.319476	1.15063	0.871012	0.977406	0.942824	1.04515	1.08162	0.847925	0.9163	0.650661	0.98022	1.02955	1.22128	0.896861	0.787004	1.71647	1.12213	0.850516	1.01519	0.349623	0.718447	0.426487	0.64726	0.992863
	1.5024	0.302993	0.899177	1.37757	1.08929	1.02274	1.33108	1.78025	0.812808	0.999853	1.58586	1.32258	1.33155	1.28776	1.03967	0.654606	1.1499	1.14145	0.955826	0.983769	1.19741	0.880596	0.854271	1.2321	1.09283	0.330531	1.29332	0.833485	0.917369	0.886306	1.33704	0.94166	0.824639	0.635146	1.23107	0.973958	1.02529	0.806931	0.757856	0.906475	1.83362	1.31587	0.866004	1.17973	0.612245	0.853249	1.41141	0.888525	1.06801
	1.15882	0.225455	0.648503	0.890972	0.832536	1.07416	1.08795	1.12506	0.88651	0.863956	0.784553	0.675603	0.861756	0.959641	1.56135	0.538336	0.842975	0.754124	0.790098	0.853628	1.12123	0.894521	1.20725	0.890543	0.551471	0.327347	0.960168	1.0484	0.801587	0.949943	0.896823	0.946569	0.752674	0.658871	0.781764	1.00726	0.981567	0.903803	1.04896	0.830946	1.10789	0.897379	0.777742	1.01671	6.18072	1.12166	1.40095	1.39461	0.749357
	1.20193	0.420833	1.20879	1.11543	2.95019	1.40433	1.82239	1.28033	1.56463	1.10951	0.278689	0.868217	1.46964	1.16919	1.38566	1.10099	0.988889	1.27191	1.37614	1.11469	1.03235	0.91309	1.1811	1.15789	1.84053	0.537209	1.07533	1.34989	1.73272	0.887549	1.45096	0.952018	1.06041	1.22115	1.32801	1.56283	0.903885	1.10577	0.924866	1.76786	1	1.0908	1.18036	1.2266	0.965625	1.38953	1.30282	1.70474	1.13849
	1.02184	0.164212	0.75296	1.44687	0.916505	1.14592	0.841808	0.944313	0.890511	0.840015	0.362784	0.629412	0.987062	1.01828	0.97794	0.58777	0.857855	0.718251	0.91266	0.833963	0.702166	0.94427	0.601036	0.794514	0.890052	0.429178	0.778772	1.04925	1.31661	0.968474	0.897666	0.809378	1.14062	1.02158	0.804797	0.986226	1.16862	0.690647	0.977778	0.987879	0.798568	0.933803	1.07499	0.907917	2.00459	1.47876	1.44937	1.21649	1.02089
	1.60727	0.454411	1.02762	0.985162	1.55319	1.45968	1.36885	1.20782	1.18519	1.23269	0.622785	0.886275	1.50544	1.67792	1.23596	1.16043	1.52646	1.43569	1.0603	1.28678	1.48526	0.684332	0.642525	1.40041	1.31613	0.39172	1.52355	1.28763	1.338	1.35761	1.39472	1.33302	1.07469	1.08833	1.42212	1.30986	0.962617	1.58806	1.02439	1.05075	1.41112	1.12929	1.06813	1.39845	0.801399	1.03128	1.07328	1.17206	1.1254
	1.76947	0.747328	0.998607	0.768472	1.0625	1.05436	1.34677	1.07226	0.978873	0.972294	0.406951	0.289299	0.726806	1.41176	1.17495	1.00192	1.09524	1.19451	0.984091	1.01617	1.57969	1.20541	1.29084	1.35694	1.71212	0.594054	0.99439	1.8137	0.654545	1.21885	1.12894	1.42422	1.28591	1.55612	1.14439	1.14286	0.960193	1.13869	0.989534	0.905797	2.75362	1.0794	0.83873	1.32636	2.61118	1.27815	1.35402	1.65217	1.09884
	0.527821	0.205839	0.767442	0.978037	0.757458	0.893368	0.702035	0.62577	0.981443	0.741763	1.07177	1.3981	0.767726	0.829861	0.52393	0.782992	0.698885	0.730489	0.893049	0.719181	0.449955	0.955842		0.506856	0.657895	0.885591	0.669385	0.596962	0.867299	0.784253	0.584609	0.658011	0.855504	1.21504	0.741114	0.978448	1.11737	0.744395	1.00093	0.919708	0.45633	0.756244	1.22549	0.622449	0.95647	0.973384	1.00104	0.855422	0.840667
	1.43891	0.435965	0.633958	0.832223	1.20893	0.733825	1.20033	0.929629	0.970654	0.961083	0.856457	0.871096	0.809929	1.05151	0.871755	0.569671	0.978468	0.799087	0.937326	0.964074	1.35655	1.0621	0.910149	1.00623	1.41734	0.707713	0.979176		1.0846	0.802036	1.16096	0.829761	0.865919	1.0332	0.946693	1.51908	0.969529	0.942525	1.00146	1.03684	1.4818	0.921672	0.90948	0.816343	0.687582	0.866613	0.855536	0.993117	0.694192
	1.1181	0.256425	0.722088	1.46471	1.07388	0.665218	1.30924	1.48673	0.996805	0.863579	1.2313	0.824896	1.37699	1.60048	0.95233	0.821345	1.18994	0.743829	1.05642	0.985183	1.08451	0.83392	0.942529	1.14973	1.41516	0.387662	1.0539	0.746884	1.54634	0.79966	1.53162	0.879394	0.753271	1.03015	0.946767	1.05556	0.959524	1.00285	1.1096	0.923077	1.47211	1.29209	0.828314	0.890837	0.596914	0.914583	0.914661	0.832025	0.994489
	1.08994	0.283256	1.11873	1.28179	1.03764	1.05144	1.23223	1.15231	0.992908	1.06305	1.36771	1.45139	1.24622	1.02388	1.24915	1.04471	1.38298	0.907593	1.08385	1.11666	1.09325	0.815255	1.12545	1.14237	1.16239	0.474477	1.10503	0.729139	1.55333	0.746618	1.26862	0.813384	0.689671	1.55233	1.07565	1.0379	1.01106	0.995475	0.976967	1.5336	0.904912	1.21586	0.882771	1.03604	1.07797	0.578947	0.58371	0.582624	1.05912
	0.88998	0.992452	0.630723	0.902725	0.653409	0.437187	1.06438	0.792675	0.744966	0.678491	1.30606	1.03361	0.623876	1.23841		0.560709	0.741818	0.520103	0.955842	0.663339	0.595256	1.3351	0.487662	0.574	0.574667	1.89132	0.373479	0.602075	0.95057	0.641039	0.973838	0.545622	0.505861	0.879076	0.520824	1.19288	1.13054	0.656442	1.11004	0.78481	1.06963	0.753411	0.895894	0.511993	0.568063	0.92616	1.16629	1.17966	0.861523
	0.963734	0.427664	0.983544	0.789317	0.752784	0.928059	0.642599	0.493818	0.784661	0.871875	1.28676	0.824524	0.560894	0.978852	1.57452	0.755272	0.709447	0.950371	0.8422	0.936763	0.963419	1.05728	0.715054	0.933397	0.496212	1.17727	0.906991	1.1314	1.06165	1.04185	0.860416	0.958822	0.913662	0.839161	0.948596	1.04545	0.995604	0.468281	1.14572	1.48673	0.621023	0.562039	0.680536	1.04366	0.640905	0.715935	0.744298	0.62039	0.681827
	1.21561	0.451387	0.573414	1.33977	1.27394	0.867219	1.43321	1.66564	1.25074	0.764923	1.72794	1.70402	1.3703	1.55589	1.03949	0.498494	0.926916	0.860301	1.16715	0.744852	1.18564	0.735477	1.04301	1.00721	0.435606	0.187158	1.17961	0.99641	1.06165	0.864509	1.24298	0.904329	0.856045	0.916084	0.990875	0.948864	1.07473	0.905569	1.19911	1.01475	1.27935	1.26843	0.928715	0.920584	1.59067	0.249423	0.193037	0.616052	1.29556
	1.34102	0.117151	0.709507	1.12044	0.728358	0.817268	1.25432	1.62193	0.961538	0.917221	0.501449	0.766197	1.20596	0.904936	0.9316	0.522474	0.964169	0.955016	1.08881	1.0301	1.22284	0.674699		1.0682	1.19118	0.254366	1.37519	0.894459	0.958153	0.964168	1.14662	0.895536	0.85033	1.3634	1.00137	1.03349	0.96	1.151	1.02248	0.644776	1.30665	1.12865	1.30027	1.01645	0.520961	1.102	1.15789	0.981612	1.00292
	1.4114	0.329734	1.01112	0.966002	1.17348	1.5567	1.16514	1.00653	1.11746	1.1587	0.64604	0.520792	1.64904	1.35161	1.57902	0.904941	1.43874	1.31012	1.01428	1.20184	1.61407	0.705714	0.901269	1.52417	1.39716	0.176842	1.71976	1.25551	0.546341	1.57312	1.38157	1.4965	1.32095	0.865909	1.48989	1.29781	0.906284	0.877888	0.985294	1.37789	1.2515	1.06784	1.34399	1.67301	0.533965	1.06723	0.991416	1.00155	0.96658
	0.915236	0.166895	0.820103	0.763629	0.839752	0.617338	1.10617	0.673043	0.888118	0.997721	1.3908	0.78628	0.607473	0.914286	0.777977	0.769116	1.04211	0.719053	0.856205	1.07024	1.2501	1.3154	0.741144	0.925235	0.810552	0.696092	0.838995	0.705154	1.19268	0.678001	1.08985	0.862864	0.577466	0.632407	1.04364	1.39274	0.964093	1.1125	1.00407	0.723032	1.11356	0.946033	0.933308	0.695346	0.808023	0.324503	0.895911	0.75082	0.714614
	0.848106	0.213139	1.14306	1.18793	0.721212	0.593598	1.06494	0.859578	0.839695	0.824881	1.48182	1.26027	0.749574	0.961404	0.622522	0.951015	0.608392	0.613997	0.856573	0.781265	0.911753	1.0606	0.778947	0.676431	1.28182	0.523825	0.615638	0.602526	0.982935	0.621133	1.10186	0.611449	0.658473	1.34815	0.893517	1.09934	1.16209	0.894118	1.02448	0.981818	1.42985	1.08303	1.44312	0.65687	0.937998	0.367197	1.07911	0.490872	0.8839
	1.98301	0.13467	0.890453	1.40797	1.02177	1.3636	0.905051	1.04361	0.974545	1.03078	0.568058	0.590629	1.67227	1.29873	1.17165	0.795605	1.7119	1.30564	1.43719	1.07833	1.63865	0.628691	0.641667	1.32555	1.0566	0.253237	1.89126	1.5443	1.58904	1.24642	1.15549	1.37879	1.32061	0.885449	1.48667	1.16129	0.972845	0.769231	1.07486	1.18812	1.81737	1.15742	1.00417	1.3285	0.520335	1.23574	1.19139	1.29272	0.839884
	0.947428	0.315543	0.950487	0.922644	0.908088	0.934206	0.628895	0.512166	0.948837	0.920441	1.36153	1.01856	0.593824	1.002	1.35805	0.714945	0.769679	0.904199	0.746874	0.925719	0.726603	0.907392	0.457368	0.855333	0.633731	0.620202	0.754578	0.87174	0.872068	0.895386	0.743731	0.817233	0.854689	0.888295	0.906682	1.05882	1.04378	0.88632	0.977857	1.12048	0.888283	0.64099	0.778035	0.903074	1.3801	1.17084	1.10677	1.05063	0.675996
	0.714761	0.138427	0.77892	0.76552	0.932936	0.819586	0.74884		0.84435	0.732145	0.718021	0.878505	0.529811	0.896445	0.732252	0.513187	0.719258	0.725595	0.863661	0.688608	0.677289	1.17448	0.84127	0.696997	0.96614	0.696049	0.718351	0.601508	1.18947	0.627495	0.858293	0.591711	0.609041	0.683844	0.819953	0.884615	1.14959	0.744731	1.0397	1.24757	0.535953	0.72321	0.8454	0.785764	0.653194	0.910931	0.941176	0.982055	0.73908
	1.42183	0.130209	0.813084	1.17931	0.753623	0.806863	1.2274	1.66312	1.41966	0.828273	0.781513	0.844444	1.32301	1.03493	0.78157	0.420254	1.12105	0.984	1.2976	0.88627	1.19261	1.09107	0.927224	1.16816	1.27717	0.246282	1.03505	1.44953	1.16327	0.982112	1.02095	1.23716	1.02963	1.23364	0.959242	1.33134	0.957565	1.1877	0.999188	0.672783	1.48436	1.23122	1.21593	0.924743	0.699928	1.76611	2.26087	1.72294	1.01528
	1.70476	0.233329	1.26347	1.05606	1.04726	0.993457	1.43185	0.965507	1.09213	1.24626	0.850648	0.758515	0.977225	1.25126	0.974156	1.15093	1.24059	1.22709	0.87479	1.28759	1.63275	0.721178	0.903333	1.46455	1.38133	0.579069	0.98781	1.73486	1.04114	1.15488	1.30304	1.30309	1.05475	1.0299	1.29857	1.21544	0.952919	0.990325	1.05991	0.882719	1.47176	1.15937	0.817616	1.14325	1.23939	1.12203	1.14101	1.18336	0.836517
	1.75408	2.50168	0.858397	1.39039	1.02362	1.03177	1.5	2.39373	1.09804	1.136	0.691916	0.324385	1.09687	1.30387	1.37515	0.734021	1.15452	1.34022	1.03319	1.18539	2.2685	0.79886	1.73973	1.48847	1.24085	0.212575	1.66925	2.55677	0.602564	1.48301	1.50687	1.96209	1.48209	0.919298	1.41041	1.20186	0.895028	1.2369	1.04253	0.666667	1.40233	1.76954	1.07463	1.50327	1.3481	1.33261	1.52914	1.64688	1.6013
	0.88748	0.13056	0.587444	1.02115	0.814414	0.788302	0.810997	0.957139	0.757732	0.734545	0.922044	0.638116	0.775024	1.02473	0.752472	0.53676	0.856187	0.722511	0.77078	0.749924	0.763594	1.16393	0.619872	0.872724	1.14701	0.32869	0.909537	0.700663	1.41869	0.680104	1.00874	0.722216	0.809336	0.341479	0.816283	0.954545	1.21564	1.08416	1.02158	1.33962	0.688488	0.987162	0.973496	0.900081	10.366	0.966797	1.03871	1.04279	0.651693
	0.611976	0.577435	0.600027	0.906427	0.711246	0.460912	0.913838	0.680502	0.78629	0.632124	1	0.911243	0.538412	0.976169	0.69823	0.740385	0.715719	0.484599	0.736804	0.613121	0.545937	1.13187	0.828431	0.496216	0.793201	1.1933	0.377498	0.360847	0.940325	0.517291	0.777098	0.539315	0.402429	0.750877	0.554565	1.01914	1.10069	0.760705	0.890347	0.854489	0.697804	0.749545	0.717026	0.511841	1.5978	1.09605	1.10377	0.988235	0.840482
	1.34856	0.145529	0.707162	0.882976	1.01523	0.963834	1.29032	0.809025	0.936455	1.22923	0.877364	0.610778	0.865646	1.41003	1.10836	0.709204	0.832536	1.12362	0.821003	1.09696	1.63722	0.767895	0.749091	1.08356	1.20571	0.58426	0.955854	0.867103	1.2064	1.04595	1.01211	0.982405	0.759175	0.700917	0.931472	1.03944	1.01196	0.97479	1.03781	0.75	0.931727	0.913261	0.600602	1.10012	0.637401	0.912214	0.998966	1.00424	0.809621
	1.71852	0.224005	0.779036	1.41515	1.02812	1.38258	1.08981	1.18298	0.909722	1.02945	0.631868	0.561871	1.64984	1.18151	1.53373	0.621926	1.12315	1.38833	1.51796	1.00843	1.27483	0.938622	1.0446	1.25895	1.60456	0.749767	1.51044	1.2961	1.51678	0.99328	1.36995	1.17264	0.903846	1.71536	1.10695	1.1016	0.927048	1.04054	0.963585	1.65333	1.71136	1.06137	1.42768	1.15383	1.5362	1.20081	1.23554	1.68868	0.797613
	0.755154	0.82034	0.848	0.760168	1.11434	0.632899	0.986239	1.06475	0.791946	0.716795	1.19205	1.42601	0.56993	0.828366	0.492285	0.664185	0.905325	0.848046	0.797504	0.770411	0.842622	1.16814	1.00746	0.687648	1.23372	0.355733	0.601284	0.451227	0.836879	0.58841	1.02471	0.656577	0.639896	1.09907	0.740738	0.929936	0.989362	0.72377	1.02033	0.450202	0.930956	0.90783	1.14358	0.659621	0.644131	0.427039	0.42446	0.283984	0.928809
	1.9802	0.121171	0.861757	1.13515	1.2795	0.769511	1.31852	1.17635	1.30616	1.04209	0.735632	0.686016	1.24709	1.24034	0.926141	0.739076	1.36842	0.949077	0.958796	1.06824	1.89233	0.873346	0.822888	1.25626	1.17506	0.321444	1.13944	1.07869	1.55867	1.14637	1.44209	1.12642	1.00297	0.925926	1.07579	1.46535	0.976661	0.953125	1.00732	0.787172	1.45032	1.10461	0.797677	1.11079	1.19628	0.708609	1.34387	1.0918	1.00066
	2.24872	0.315054	0.836688	1.16182	1.21711	0.816015	1.20889	1.4256	0.882129	0.936172	0.504331	0.288528	1.1188	1.83582	0.976744	0.706165	0.946565	0.887598	1.2129	0.955568	1.57682	0.99334	1.00862	1.37886	1.23265	0.832976	1.09458	2.30497	1.23894	1.1508	1.56036	1.22551	1.16746	1.33617	1.11552	1.36816	1.01878	0.976431	1.09615	1.17105	1.12877	1.17012	0.807773	1.08072	1.00376	1.18803	1.26328	1.82295	1.1719
	0.786623	0.244147	0.94819	0.82062	1.10229	0.883004	0.643624	0.867608	1.02108	0.849905	0.977974	1.14241	0.626087	0.958678	1.14952	0.843855	0.666667	0.922879	0.920976	0.833716	0.761788	0.913098	0.723032	0.833421	0.717391		0.921629	0.578602	1.06522	0.749483	0.932798	0.713676	0.762276	1.08995	0.989545	0.962801	1.03279	0.890566	0.984475	1.02703	0.855061	0.864203	0.478215	0.899576	5.10954	0.703382	0.79089	0.712538	0.515284
	1.24363	0.0987824	0.823019	1.08909	0.907627	0.729252	1.09709	1.09936	1.03128	0.986285	0.861102	0.726816	1.15073	1.17377	0.859504	0.72472	1.13864	1.05849	0.752254	1.06461	1.16152	0.64319	0.883087	1.1542	0.939614	0.353479	1.03708	0.767972	1.24124	0.75387	1.25274	0.89036	0.77752	1.06531	0.923693	1.14166	0.955629	0.880906	1.03706	0.971292	1.16037	1.10893	1.21087	0.903516	1.15096	0.944182	0.943036	1.00452	0.84648
	1.13287	0.111207	0.654668	0.927967	0.731532	0.901851	1.12715	0.844423	0.917526	0.76522	0.326278	0.552463	1.02721	1.41246	0.618031	0.363364	0.896321	0.917628	1.00303	0.744949	0.964134	0.624972	0.903846	0.879035	0.882033	0.364321	1.15753	0.904117	1.14187	0.831118	0.961455	0.833393	0.752397	1.00322	0.934463	1.02525	1.07109	1.16832	0.946043	1.26415	1.51068	0.927222	0.901915	0.921922	5.84456	1.15039	1.17849	1.1981	0.906394
	0.295677	1.02136	0.747731	0.219568	0.934831	1.11127	0.570637	0.444464	1.07558	0.924568	1.68238	1.25778	1.10535	0.576205	0.862941	0.626953	0.531507	0.555578	0.833277	1.00359	0.445173	1.09131	1.0028	0.683621	0.178715	2.18114	0.501855	1.34424	0.621881	1.37783	0.526796	1.20603	2.08871	1.27602	0.680281	1	0.886311	1.04505	1.034	0.811189	0.0935891	0.44424	0.517766	0.959188	140.191	1.38018	1.2646	1.52311	0.939115
	1.83249	0.103189	0.570853	1.35405	0.904459	1.14004	1.08078	1.00477	0.849362	0.807249	1.28686	0.625	1.52997	1.12646	0.947639	0.422378	1.10497	0.82476	1.07876	0.806062	1.22414	0.522171	0.666667	1.1301	1.1809	0.326579	1.23574	1.51839	1.64525	1.19093	1.16744	1.16939	1.05055	1.08787	0.976643	0.915888	0.966148	1.02222	0.999198	1.44479	0.834945	1.11072	1.23207	1.12902	0.55313	2.45283	2.3125	2.25893	0.821896
	1.76555	0.135734	1.40297	1.69421	1.1833	1.46863	1.37156	1.41632	0.95302	1.16712	0.619573	0.709417	1.58182	1.39157	1.21863	1.20906	1.36686	1.37526	1.02926	1.10584	1.72978	0.727434	0.783582	1.44115	1.48659	0.25407	1.64344	1.49232	1.03546	1.35804	1.26	1.4391	1.18426	1.57009	1.48689	1.57325	0.885106	1.44262	0.966728	1.15789	1.95979	1.57215	1.45768	1.43491	1.50329	1.2382	1.35731	1.67188	1.05034
	1.10151	0.490377	0.985821	1.08214	1.0676	1.13185	1.26072	0.76554	1.082	0.946417	0.759147	0.697968	0.886041	1.00649	1.21235	1.45841	1.0609	0.885551	0.809994	0.993251	0.88285	1.24778	0.916263	0.913748	1.14762	0.684498	0.755626	0.746103	1.3846	0.769203	1.21439	0.777149	0.807548	1.44925	0.856542	1.30653	1.01111	0.598485	0.964845	1.38694	0.87537	0.968488	1.10135	1.08171	0.552865	1.27451	1.16718	1.2788	0.729228
	0.68411	0.404682	0.711745	1.00641	1.04021	0.562787	1.18895	0.920177	0.717526	0.682885	1.54477	1.36967	1.01005	1.99653	0.48731	0.508592	1.42007	0.631109	0.988997	0.666687	0.65308	1.07208		0.676043	1.12719	0.491627	0.461602	0.539632	1.07109	0.517289	1.13318	0.513418	0.429517	0.891032	0.662303	0.913793	1.0493	0.713004	1.05116	0.778589	1.76693	0.975551	1.32769	0.574683	1.29871	0.473384	0.472425	0.521084	0.863905
	0.748684	0.166436	0.647456	0.984051	1.12809	0.676934	1.08033	0.942076	1.1686	0.849178	0.996374	0.72	0.692368	1.18584	0.855465	0.585463	0.821918	0.784081	0.915592	0.826552	0.74172	0.840779	0.677871	0.938019	1.249	0.370951	1.03853	0.594091	0.927063	0.672922	1.09561	0.720789	0.571557	0.604525	0.826991	0.892019	1.18329	0.842342	1.128	1.23077	1.02761	0.894594	0.752961	0.930867	0.53777	0.320276	0.390062	0.337893	0.718776
	1.34557	0.128	0.551414	0.990959	1.16117	0.998676	0.958017	0.880454	1.01695	1.33996	0.761836	0.595385	1.48233	1.2433	0.94683	0.477675	1.24855	1.53947	1.26791	1.23297	2.12175	0.805579	1.02473	1.47452	1.09211	0.439884	1.71755	1.60417	1.60137	1.27115	1.25925	1.52044	1.48903	0.864823	1.46387	1.23601	0.962963	1.0581	1.02304	0.782875	1.19149	1.11684	0.84554	1.28317	0.322923	1.09817	1.04612	1.2256	0.873449
	0.19406	2.99556	0.573736	0.330903	0.583587	0.614461	0.42459	0.314826	1.15556	0.737748	1.68101	2.21176	0.290005	0.301299	0.365921	0.984538	0.32312	0.510329	0.370218	0.719525	0.258718	1.34129	0.624585	0.365043	0.153548	3.8835	0.305767	0.304092	0.615385	0.660146	0.472102	0.557966	0.649445	0.48265	0.485581	1.10798	1.27103	0.45194	0.917448	0.997015		0.363721	0.496855	0.478973	1.18182	0.61554	0.510776	0.388416	0.553912
	0.526503	0.162236	0.578916	0.802042	0.7	0.590239	0.789474	0.560989	0.862319	0.670352	1.7439	1.67939	0.843383	1.01418	0.420592	0.355516	0.885057	0.650576	1.00303	0.690094	0.562279	1.36999	1.128	0.455459	0.751634	1.28122	0.275662	0.53626	1.20101	0.469681	0.797923	0.45492	0.505433	1.1958	0.447946	0.966507	1.21247	0.570833	1.04808	1.03593	0.671283	0.637679	1.18541	0.382485	0.876636	0.651992	0.447084	0.498534	0.862986
	1.05197	0.138016	0.566331	1.2866	1.00329	0.867478	0.805333	1.23748	0.980989	0.867008	0.864293	0.723059	1.14213	1.12935	1.27946	0.672748	0.908397	0.984264	0.833158	0.926	1.41703	0.957455	0.905172	0.922548	1.09388	0.312452	1.01334	0.926493	1.23304	0.795298	1.16429	0.873634	0.981873	0.842553	0.999324	1.02985	1.09155	1.10438	1.01923	1.69079	0.632818	1.14812	1.12574	0.855412	0.787378	0.931624	1.02599	0.963934	0.931788
	1.21334	0.145778	0.620705	0.97369	1.09627	1.05909	1.22137	0.97663	0.894602	0.731467	0.761181	0.689218	0.896694	1.30643	0.849045	0.43004	0.83682	0.868665	0.995113	0.74512	0.851574	0.627623	0.953947	0.840289	0.753036	0.438888	0.981018	1.20411	1.02091	0.901816	0.889872	0.867394	0.905829	1.57934	0.845742	0.994975	1.03679	1.09955	1.01921	1.16279	1.11523	0.874688	0.835344	0.929723	0.749065	1.27766	1.48216	1.65742	0.923726
	2.19889		1.05644		1.20923	1.46068	1.35025		1.13014	1.18074	0.330696	0.469683		1.20488	1.37725	0.946148		1.68124		1.14463	2.65528		1.06135	1.85347	2.10895		1.90395	2.18556	1.36564	1.58941		1.69172	1.29076	1.4876	1.34962	1.55556	0.839612	1.66052	0.960463	1.26141				1.61539		1.31858	1.373	1.80171
	0.932715	0.157322	0.485361	0.756545	0.621711	0.543268	0.840889	0.667904	0.86692	0.675214	1.18961	0.723059	0.600583	0.893035	0.686638	0.442289	0.977099	0.804171	1.09364	0.674032	0.825846	1.25975	0.833621	0.731378	0.765714	0.982689	0.760484	0.8447	1.70501	0.638125	0.899847	0.758025	0.744713	0.90383	0.755325	1.24378	0.992958	0.882155	1.11923	0.5875	1.5585	0.810869	0.824474	0.615632	0.507889	1.13034	1.15932	1.15082	0.727751
	1.3007	0.154212	0.731439	0.765247	1.12829	1.63015	0.948837	0.689066	1.05085	0.968322	0.559489	0.49313	1.31125	1.27238	1.57569	0.478998	0.896321	1.06773	1.0194	1.01161	1.66021	1.02376	1.05473	1.02568	0.749164	0.982756	1.092	2.00121	1.76604	1.35396	1.00858	1.13801	1.1799	1.33992	0.973621	0.92823	1.06571	0.964856	0.887021	1.90099	0.997602	0.731006	1.09324	1.31593	0.903319	1.28525	1.34558	1.67708	0.962508
	1.97847	0.13908	0.484444	1.2588	1.04713	0.91446	1.19777	1.21245	0.772766	0.93258	1.0563	0.629286	1.19487	1.30616	1.14483	0.48773	1.10497	1.66125	1.13068	0.926197	1.46475	0.753349	0.92011	1.40228	1.44221	0.29829	1.39192	1.51498	1.00838	0.936451	1.43285	1.21289	1.23487	1.43933	1.04025	1.22741	0.94236	0.980952	0.99599	1.1041	1.46895	1.28055	0.986082	1.06002	0.630762	1.40094	2.29167	2.35714	1.17556
	1.01139	0.333203	0.668425	1.0093	1.15074	0.915288	0.963173	0.946804	0.930233	0.850283	2.07535	1.65361	1.21751	1.43888	0.792816	0.449645	0.833819	0.858424	1.21402	0.810083	0.944974	0.663807	0.663158	0.904337	0.432709	0.33641	1.1881	0.619826	0.884861	0.71856	1.01039	0.771979	0.713059	1.07964	1.02276	1.10695	0.965438	0.959538	0.974314	1.03614	0.968665	0.962886	0.882948	0.856892	0.567539	0.659412	0.743972	0.740506	1.03403
	1.04477	0.257987	0.538404	0.858807	0.816156	0.721834	1.01166	0.807477	0.881988	0.763373	0.805217	0.619469	0.733852	0.944869	0.814215	0.582292	0.814815	0.749803	0.779697	0.817479	0.826655	1.05683	0.613924	0.863446	0.960452	0.437667	0.89587	0.708766	1.16329	0.699132	1.19913	0.77345	0.727845	0.58341	0.782807	1.12655	0.957746	0.941176	1.01979	0.874618	1.03914	0.915337	1.02691	0.772091	0.644118	1.11817	1.21127	1.21375	0.834579
	2.05086		0.46113		0.853731	1.10819			0.969245	0.712767	0.61413	0.554605			0.753552	0.461927		0.946789		0.714224	1.08164		1.27333	1.07004	1.05291		1.27619	1.40146	1.54989	1.31256		1.0734	0.955685	1.56303	0.957894	1.15274	1.00936	0.88958	1.00243	1.24927				1.11808		2.0071	2.15953	2.59717
	1.22165	0.122346	0.825877	0.893406	0.577836	1.12469	1.29317	1.01102	1.03514	0.942244	0.846951	1.17842	1.41687	0.958838	1.60376	0.789459	1.42458	0.827538	0.899532	1.09657	1.50409	0.791655	1.11111	1.05918	1.38628	0.462598	1.18212	2.19806	1.2	1.03725	1.11096	1.14391	0.978073	0.917085	1.04726	1.05093	0.919048	1.11111	1.00485	0.987179	0.925384	1.01904	0.953431	1.00206	0.642237	0.979167	1.04158	1.16797	1.02657
	1.07445	1.06059	1.05064	0.803179	1.29362	1.3054	0.872727	0.686623	1.03684	1.08366	0.909091	1.07066	1.07174	1.34456	1.33314	0.942379	0.895735	1.4189	1.03801	1.15528	1.15196	0.58301	0.795455	1.31873	1.04974		1.69406	1.0721	1.06452	1.10308	1.14687	1.29	1.1626	0.816964	1.45187	1.05155	0.855263	1.25367	1.04728	0.913043	1.2724	0.924073	1.07832	1.32668	1.08562	0.574974	0.519016	0.493997	0.714494
	0.789416	0.44363	0.429951	0.700889	0.683784	0.557074	0.902256	0.509341	0.884058	0.76269	0.871951	0.992366	0.373532	0.735225	0.636945	0.727628	0.643678	0.528793	0.596398	0.736666	0.688015	1.19796	0.6328	0.687366	0.673203	1.6429	0.512151	0.811408	0.496482	0.903495	0.542149	0.715251	1.01591	0.558042	0.605268	0.899522	1.03695	0.85119	1.08846	0.60479	0.698984	0.508646	0.958588	0.667151	0.891589	1.22432	1.21382	1.1173	0.862986
	1.98198		0.631868		1.11045	1.32993			0.784716	0.890649	0.945652	0.45			1.22435	0.461701		1.09945		0.881249	1.44753		0.548	1.20804	0.994709		1.3604	1.44245	1.16773	1.08061		1.27832	1.12601	1.35767	1.0555	1.27954	0.977528	0.908243	0.94413	1.46041				1.16746		1.11545	1.96498	2.70318
	1.13214	0.123008	0.484972	0.946064	0.797546	0.952667	1.09091	0.679174	1.04388	0.747872	1.09402	0.803493	1.10297	1.17293	0.696019	0.37794	0.859206	1.04087	1.21748	0.727776	0.922999	0.733269	0.932203	0.81885	0.901554	0.545771	0.961995	0.798547	1.54943	0.745976	0.91617	0.74146	0.66593	1.1	0.749904	0.853933	1.04202	0.827324	1.05622	1.11282	0.56069	0.878304	0.904946	0.867678	120.763	1.08184	1.1692	1.29462	0.849537
	1.65043	0.752183	1.13918	1.1746	1.37872	1.12307	1.30909	1.48403	1.07895	1.0923	0.735537	0.672377	1.27121	0.803591	1.27517	0.957711	1.17536	1.28357	1.02467	1.20344	1.89206	0.841412	1.12121	1.49782	1.25214		1.54069	1.47179	1.02903	1.24663	1.0735	1.43906	1.09814	0.928571	1.34286	1.22165	0.864035	0.989518	0.991971	1.08696	1.44447	1.4113	1.60049	1.44257	5.83937	1.16443	1.17673	1.1458	0.972625
	1.27963	0.204957	0.886343	0.914612	1.12672	1.53749	1.24944	1.46884	0.978328	0.967842	1.57689	1.23223	1.74168	1.25217	1.18943	0.647753	1.24113	1.04203	1.17217	1.0053	0.971406	0.811722	0.833333	1.01283	0.935849		1.22919	0.722184	1.47335	0.782548	1.08442	0.756308	0.770901	1.57256	1.16646	0.846797	1.02948	0.753731	0.900376	1.01805	1.12398	1.04348	0.990462	1.2126	0.802891	0.690632	0.840223	0.488599	0.938269
	1.51598	0.1425	1.08362	0.782574	0.981048	0.792282	1.24932	0.876209	1.2949	1.0801	0.92437	1.06667	0.880805	1.05768	0.742476	0.85605	0.915789	0.853294	0.973335	0.916449	1.23603	1.13145	0.96496	1.08323	1.17935	0.932335	1.07251	0.992816	1.23324	0.916582	1.06502	0.941107	0.81908	0.971963	1.04776	0.913433	0.968635	1.00647	1.00406	0.75841	1.14718	0.828911	0.966816	0.899574	0.427332	0.843462	1.35072	0.782107	0.872574
	0.471319	0.691321	1.10513	0.584715	0.657895	0.599684	0.493548	0.395493	0.838028	0.718576	2.02752	2.73801	0.569502	0.677188	0.575506	0.915609	0.673469	0.844982	0.620698	0.747605	0.457448	1.28509	0.751394	0.457217	0.428788	2.30303	0.486937	0.462747	0.719192	0.627249	0.414297	0.508272	0.708022	0.72619	0.640851	0.907563	1.30277	0.59781	1.03901	0.818841	0.315124	0.414506	0.697143	0.538201	3.34364	0.463576	0.393103	0.262609	0.581796
	1.5498	1.22118	0.764633	1.55152	1.15128	1.13232	1.65649	1.90545	1.00257	1.02943	0.735865	0.5074	1.53209	1.35183	1.21627	0.532967	1.4477	1.35768	1.14284	1.13621	1.8145	0.980155	1.26974	1.41941	1.63968	0.229395	1.52868	1.40028	1.10801	1.24839	1.2274	1.53132	1.59636	1.62629	1.54779	1.27638	1.06355	1.18552	0.770357	0.825581	2.05889	1.66358	1.31256	1.43603	3.84579	1.21712	1.0794	1.02447	1.23325
	1.22338	0.155622	0.592219	1.16174	1.01974	1.25042	0.654032	0.642191	0.880282	0.90449	0.673425	0.617712	1.25778	0.946915	0.960866	0.437496	0.85034	0.856571	1.29417	0.84565	1.00842	1.10587	0.812749	0.970328	0.856061	0.904822	1.14377	1.07652	1.32525	1.04019	0.849839	0.950507	0.854011	2.70408	0.897166	1.13165	1.05187	0.854015	0.997146	1.42029	0.53809	0.802062	1.56349	1.02175	0.944114	1.3223	1.36092	1.74957	0.973244
	1.16934	0.144359	0.496677	1.22594	1.04255	1.22945	1.36292	1.07582	0.879032	0.874736	1.0087	0.639053	1.24136	1.2692	1.26039	0.441132	1.07692	1.10104	1.31212	0.760967	1.24908	0.593334	1.03431	0.996423	1.35977	0.436494	1.24319	0.718748	1.27667	0.865217	1.37654	0.996508	0.715927	1.68421	1.07657	1.17225	0.938215	1.12846	0.922212	1.62848	1.07424	1.0714	1.27584	0.994752	0.389118	1.20452	1.15802	1.25378	0.841382
	1.05382	0.353073	0.682789	1.5693	0.865435	0.920399	1.53414	1.49	0.85623	0.810964	0.552359	0.46805	0.860684	1.57869	1.11855	0.595142	0.815642	0.839343	1.03932	0.825192	0.911698	0.9534	1.18774	0.953848	1.15523	0.357476	0.881602	0.963176	1.4439	0.7587	1.43861	0.908588	0.944168	1.97236	0.929108	1.06019	0.961905	0.843305	1.04753	1.45513	1.04881	1.23219	1.20242	0.853893	1.17165	1.2625	1.33698	1.57928	0.95434
	0.925428		0.415531		1.08259	0.483512			0.924511	0.607293	1.46196	0.736842			0.497457	0.475196		0.443303		0.580882	0.643877		0.72	0.659695	0.730159		0.506919	0.355181	1.12102	0.506232		0.543952	0.489257	1.24358	0.644342	1.14121	1.05431	1.06687	0.987854	0.8739				0.583454		0.396092	0.562257	0.862191
	0.766441	0.589014	0.795362	0.807674	0.88707	0.5264	0.743128	0.541968	0.815603	0.787632	0.825112	1.0625	0.556962	0.853731	0.592676	0.641159	0.87234	0.64575	0.94969	0.793804	0.72386	1.33765	0.594634	0.624434	1.05983	1.66274	0.424814	0.65266	1.43333	0.708293	0.994246	0.60882	0.610832	0.694301	0.687341	1.05539	1.10398	0.797285	1.06334	1.09091	0.624606	0.701886	0.980107	0.573646	1.02147	0.913684	0.993213	0.807496	0.751707
	1.27127	0.247366	0.794553	0.945167	0.831715	1.38455		1.01973	0.985816	1.28748	0.983704	1	1.46426		1.63792	0.543948	1.38624	1.21875	1.07914	1.37217	1.90406	0.879777		1.38213	1.21455	0.669985	1.64057	1.19953		1.22975	1.29674	1.38145	1.06503		1.29472	1.30693	0.929316	1.27726	0.979817	0.899371	1.48349	1.13744	0.859064	1.25977	0.825456	0.981524	0.873479	1.01239	1.17383
	1.14303	1.41289	0.694938	0.800588	0.933852	0.630328	1.30087	1.01971	0.890722	0.881097	1.07177	0.611374	0.535724	0.888889	0.657723	1.00529	1.04089	1.02525	0.929357	0.859044	1.23664	0.969901		0.960089	1.02193	0.547531	0.839842	1.08762	0.985782	0.945736	0.99568	1.04116	0.962309	0.451302	1.01852	0.991379	0.971831	0.964126	1.03814	0.554745	1.06035	1.14464	0.753753	0.883952	5.75083	1.13878	1.28408	1.23193	1.11716
	0.273295	0.719671	0.684595	0.818159	0.537563	0.364158	0.625965	0.471868	0.851351	0.606473	1.76718	2.22672	0.216625	0.668639	0.466074	0.75477	0.475676	0.634603	0.513754	0.521529	0.215051	0.870394	0.809735	0.330864	0.236721	1.44244	0.24356	0.215213	0.657407	0.495861	0.560803	0.386428	0.494004	0.909091	0.498623	0.997403	1.19448	0.469508	1.0429	0.413468	0.26303	0.547924	0.786667	0.362418	2.68456	0.563231	0.593819	0.410084	0.776479
	1.61966	0.130893	0.884825	1.11955	1.08738	1.08663	1.70306	1.01973	1.17021	1.2883	1.4237	0.900826	1.25363	1.56636	0.999689	0.616307	1.38624	1.36	0.923291	1.27925	1.47651	0.969214	0.589781	1.58176	0.836364	0.518495	1.43458	1.29251	1.18143	1.12421	1.48391	1.42882	0.995995	1.00716	1.31372	1.13366	0.929316	1.23364	0.93211	0.607547	1.55938	1.20524	0.983112	1.12353	1.40571	1.12933	1.06813	1.28496	1.13322
	1.01505		0.904067		1.56842	0.614159	1.15119		0.80791	1.01182	1.31765	0.987179		1.19861	0.935952	0.741161		1.15346		0.952348	0.967225		1.06825	1.16491	1.28172		1.01596	0.917999	0.904393	0.71584		0.934085	0.867953	0.587578	1.01819	1.13018	0.976701	1.07987	0.995138	0.929032				0.741367		0.755507	0.591304	0.840467
	0.38226	3.59551	2.01588	0.450712	0.757079	0.750381	0.511597	0.370509	1.1258	0.853303	1.96466	1.82243	0.254132	0.469861	0.628679	3.01155	0.487239	1.20178	0.394398	0.920251	0.566231	1.28031	1.88889	0.519402	0.487585	2.6952	0.376205	0.658629	0.911579	0.824461	0.359036	0.746589	0.843117	0.711699	0.757175	0.987179	1.19199	0.637002	1.04726	0.747573	0.0546169	0.395667	0.475867	0.65712	0.259887	1.02834	0.838503	0.668842	0.901886
	0.941284	0.158695	0.583333	0.866229	0.950495	0.766463	0.749164	0.581453	0.707395	0.909619	1.25606	1.13947	0.979807	1.08736	0.601348	0.46145	1.09541	0.699793	1.12207	0.932609	0.72024	1.05606	0.700315	0.74456	1.02146	0.85832	0.755043	0.69752	1.53672	0.728477	0.826044	0.660783	0.662489	0.944828	0.7518	1.1922	1.07216	0.824903	1.01365	1.384	0.906063	0.707567	0.896752	0.703921	1.01974	0.929705	1.03813	1.08046	0.654701
	1.20815	1.04656	0.729715	0.985385	0.817289	1.02806	0.984733	0.986527	1.00257	0.954371	0.681013	0.536998	0.970102	1.03909	1.42237	0.649772	1.02092	1.13371	1.24027	1.02616	1.86244	0.543796	0.868421	1.27411	1.37247	0.362903	1.3892	1.89771	1.06969	1.26521	1.28226	1.61076	1.63585	0.730516	1.41188	1.13065	0.876254	1.34842	1.03934	0.848837	1.02108	1.25418	1.06792	1.29331	0.798598	1.25887	1.24511	1.24633	1.1041
	1.28818	0.126703	0.789314	1.19877	0.958264	0.746545	1.30526	1.39102	0.912162	0.86386	0.709677	0.576518	1.56675	1.15089	0.69063	0.611938	1.26486	1.23358	1.1668	1.17836	1.54758	0.90787	0.8	1.11127	0.996721	0.246107	1.37068	1.29511	1.47222	1.05599	1.35939	1.14431	0.917987	1.06639	1.1346	1.0961	0.943613	1.12131	1.06196	0.841751	2.06624	1.31622	1.05943	1.00039	1.42953	1.25399	1.23179	1.41176	1.0901
	0.26787	3.5527	1.7533	0.258347	0.531952	0.555612	0.575	0.248306	1.1102	0.664001	1.63052	1.83282	0.230074	0.298507	0.351123	1.62607	0.651163	0.51113	0.291454	0.658056	0.313087	1.10591	0.70024	0.430878	0.181015	3.49685	0.329997	0.377683	1.4	0.641638	0.382381	0.591056	0.569726	0.373684	0.496617	1.09398	1.22169	0.59375	1.0819	0.860681		0.354658	0.436681	0.551547	0.893978	0.923747	0.805588	0.619718	0.657792
	1.26215	0.22605	0.710483	1.308	1.00382	0.919343	1.47857	1.07081	0.992366	0.933601	0.735417	0.641756	0.853245	1.08731	1.1659	0.577278	1.03125	1.24966	1.11412	0.880573	1.70922	0.734316	0.864353	1.22121	1.09388	0.625079	1.36508	0.960576	1.27424	0.840718	1.42346	1.14976	1.0925	1.28244	1.08833	1.20216	0.919592	1.09881	1.00091	1.12915	0.674938	1.16918	1.09252	1.01082	1.24044	1.06099	1.076	1.05128	0.769381
	1.1976		0.641344			0.61211	0.997101			0.668371	0.876877	0.694534		0.893238	0.767759	0.54261		0.559297		0.582325	0.745767		0.737201	0.720944	0.775194		0.656924	0.473386	2.2	0.693514		0.635315	0.669222	1.29705	0.685519	1.05031	1.02144	1.02484	1.03862	1.04706				0.694415
	0.667423	0.420101	1.21787	0.824926	0.660793	0.57516	1.02256	0.770047	0.766871	0.698198	1.54876	1.2988	0.491469	0.925	0.393229	1.04377	0.777027	0.623019	0.652963	0.731529	0.652932	1.13964	0.85259	0.534987	1.02326	0.5875	0.442849	0.561302	1.09495	0.496186	0.905774	0.523837	0.581737	1.32848	0.660514	1.26554	1.12791	0.616382	1.06322	0.651748	1.04412	0.740229	0.707754	0.514818	1.56894	0.931959	1.02407	1.02589	0.889379
	1.39453		0.823691		1.12637	1.62136			0.872321	0.951386	1.3587	1.32895			1.224	0.70484		0.897859		0.957218	1.16203		1.41333	1.09197	1.57672		1.24415	0.702195	1.09979	0.925054		0.860862	0.964861	1.2664	1.25712	0.974063	1.03184	1.03888	0.911741	1.77126				1.25142		1.34103	1.44747	1.4841
	0.881766	0.166854	0.603779	0.935986	0.974359	0.765821	0.913595	0.635346	0.771242	0.72617	1.22647	1.12268	1.27309	1.22241	0.774298	0.476214	1.09137	0.745105	1.12938	0.68047	0.83119	0.871112	0.65757	0.726785	0.812261	0.513244	0.843204	0.637364	1.31365	0.67427	0.903836	0.663887	0.487523	0.871629	0.805639	1.03627	1.04248	0.886598	1.01308	1.21254	1.12807	0.81379	1.16673	0.729534	0.510215	0.721608	0.701973	0.670886	0.708504
	1.21521		1.0381		1.09226	1.31144	1.14805		1.04348	1.1897	1.46207	1.24664		1.32603	1.33427	0.575089		1.22652		1.21136	1.27813		0.928105	1.26235	1.50943		1.32841	0.935876	1.41699	1.0527		1.14915	0.965687	1.14393	1.31707	1.15966	1.04839	1.08046	0.790431	0.819188				1.18726		0.582589	0.400483	0.557983
	0.877372	0.159534	0.943014	0.765453	0.883008	0.603268	0.699301	0.699065	0.925466	0.948279	1.08696	1.53982	0.562201	0.620865	0.730898	0.907027	0.592593	0.976824	0.919697	0.977185	0.778614	1.02502	0.639241	0.737352	0.728814	1.24434	0.601687	0.516779	0.882591	0.760488	0.86097	0.650421	0.9954	1.16129	0.691144	0.987593	1.08451	0.862745	1.0311	0.911315	0.858887	0.687122	0.928661	0.642277	0.555147	0.764647	0.842904	0.795217	0.647664
	0.489658	0.910068	0.710101	0.781116	0.739555	0.466799	1.01791	0.972508	0.746504	0.574042	1.46104	1.33602	0.565033	1.0785	0.392943	0.382096	0.899644	0.626206	0.994354	0.550466	0.50502	1.31364	1.12213	0.48141	0.938809	0.809096	0.42863	0.353822	0.944096	0.39338	1.00012	0.421974	0.317503	0.816542	0.620296	1.02305	0.974325	0.665457	1.01364	0.806478	1.38176	0.950707	1.16025	0.414675	1.26757	0.539713	0.555885	0.542158	1.15423
	0.919395	0.285245	0.441916	0.928574	0.926733	0.96696	1.16575	0.985466	0.795238	0.913428	0.593715	0.721739	0.970202	0.971537	1.01069	0.346374	0.787565	0.759723	0.748706	0.916264	1.19557	1.00374	1.2462	0.875049	0.496753	0.355195	0.827015	0.875003	0.941847	0.913582	0.843991	0.898562	0.867104	0.689189	1.10903	0.977444	1.02535	0.934831	0.961679	0.905325	0.693848	0.770918	0.934768	0.935279	1.62806	0.899083	1.06437	1.82278	0.739395
	1.65152	0.417841	0.523071	1.05783	1.14951	0.933439	1.29944	2.01256	0.982968	0.847396	0.669344	0.524706	1.28378	0.734552	0.941115	0.532857	1.05736	0.84594	1.0634	0.804598	1.66998	0.749254	1.18653	1.1668	1.46073	0.188594	1.15264	1.26634	0.824451	1.12921	1.13408	1.1016	0.880542	0.848921	1.10996	1.33333	0.946136	1.23741	1.06111	0.636364	1.24754	1.30257	0.96614	1.09835	0.92844	1.43972	1.35609	1.62199	1.25262
		0.195314		0.78508	0.567442		0.962343	0.621916	0.845669		0.897571	1.30935	0.516371	0.962963			0.852941		0.704409			1.05194	1.97759		1.46985	0.670719			1.65184		0.94419			2.3698		1.01247	1.04339	0.790698	1.00635	0.744828	1.5004	0.799432	1.02043		0.655145	0.534447	0.642674	0.567133	0.769938
	0.224295	2.00403	0.677419	0.24167	0.469903	0.467035	0.538418	0.290992	0.934307	0.47295	1.21285	1.40588	0.208741	0.283725	0.244572	1.19395	0.369077	0.354218	0.323999	0.482834	0.181644	1.15009	0.901554	0.256807	0.216754	3.0865	0.227807	0.212242	0.652038	0.431462	0.475513	0.346573	0.512115	0.413669	0.46064	0.30854	1.13349	0.425899	0.62963	0.519394		0.30835	0.546777	0.45849	0.772477	0.0897819	0.218203	0.0570447	0.844043
	0.833037	0.470111	0.669837	0.717821	0.813397	0.554274	1.31596	0.95657	0.852248	0.752159	0.921409	1.05094	0.657507	0.882511	0.425721	0.832761	0.702479	0.900716	0.826167	0.709114	0.931993	1.0007	0.860104	0.744319	0.8125	0.443582	0.724661	0.759552	0.812169	0.758057	0.969872	0.717038	0.771144	0.658871	0.740303	0.803874	1.0553	0.970917	0.947269	0.520344	1.17654	0.873401	0.921264	0.691647	5.0996	0.969337	1.04296	0.827258	0.912118
		1.04703		1.50819	0.836364		1.15152	1.936	0.924829		0.0808055	0.254639	1.63031	0.978477			1.31471		1.12058			1.16825	1.30693		0.843327	0.335157			0.979439		1.26081			1.01901		1.06888	0.962877	1.15718	0.774309	0.561308	1.46558	1.59025	1.28878		0.88835	0.748739	0.635676	0.464912	1.19951
	0.6828	0.554508	0.804818	0.744911	0.869903	0.882196	0.666667	0.559236	1.06569	0.794035	0.756359	1.20588	0.27142	0.644038	0.72642	1.08382	0.603491	0.637256	0.74277	0.81422	0.572215	1.46657	0.88601	0.72159	0.539267	1.49246	0.547269	0.666577	0.786834	0.743186	0.695259	0.608965	0.961803	0.692086	0.721648	0.525069	1.16862	0.743405	0.990741	0.570303	0.537601	0.662563	0.79082	0.687883	0.565138	0.991963	0.973834	0.876289	0.87301
	0.131642	2.01073	0.712107	0.312416	0.575893	0.402145	0.466216	0.266456	0.847291		1.41919	1.69355	0.330074	0.248101	0.202963	1.10339	0.340862	0.439591	0.301225	0.516147	0.194232	1.11358	0.748744		0.209283	2.81432		0.198886	0.344013	0.412475	0.500164	0.341571	0.381428	0.408368	0.40713	0.546875	0.848276	0.45099	0.927911	0.856115		0.292343	0.440177	0.439375	1.12585	0.310273	0.351351	0.177377	0.792899
		0.163845		1.39771	0.869767		1.68201	1.18812	0.927559		0.574446	0.618705		1.30159			1.15686		1.34018			0.759426	0.885533		1.43659	0.487856			1.11412		1.71175			2.12136		1.17682	1.00317	1.08527	0.937443	1.6092	1.78359	1.24861	1.0572		0.554595	1.34029	1.40874	1.56643	0.959333
	0.371742	0.355667	0.834318	0.708681	0.661157	0.596304	0.65303	0.268085	0.993166	0.840198	1.63625	2.22165	0.35991	0.581126	0.512503	1.10532	0.64432	0.76218	0.757906	0.778528	0.344207	0.89201	0.89604	0.431102	0.73501	1.52955	0.48761	0.578544	0.833645	0.701404	0.445256	0.582284	0.605051	1.31559	0.619158	1.08314	1.17633	0.687927	1.02052	0.850136	0.518941	0.574229	1.02195	0.527144	0.668686	0.668012	0.581622	0.552632	0.646025
	1.36365	0.26774	0.543792	0.904974	1.2294	1.02858		1.046	1.10914	0.862524	1.27451	0.955603	1.40862		1.26815	0.583023	1.10517	0.872401	1.1193	0.854623	2.11943	0.467363		1.12559	1.16288	0.351781	1.25945	1.20323		1.0669	0.931585	1.1463	1.01056		1.22083	0.259659	0.982418	1.06538	1.12347	1.06195	1.34738	1.162	1.06094	1.16652	3.89815	0.487298	1.22449	0.880694	0.983503
	1.80958	0.178542	0.92762	1.31199	1.12715	1.38672	1.18672	1.26968	0.902899	1.20271	0.569754	0.66761	1.39454	1.26255	1.27487	0.780324	1.62228	1.17021	0.935651	1.12334	2.57056	0.89158	0.936364	1.53131	1.27708	0.443825	1.82347		1.27191	1.36813	1.11852	1.51818	1.45809	1.42857	1.44527	1.39701	0.936128	1.35369	1.03303	0.890179	1.58581	1.27034	1.27672	1.40445	0.846024	1.20533	1.51792	1.89546	0.978923
	1.92912	0.172765	0.877996	1.42283	0.969072	1.1148	1.3527	1.4799	1.0971	1.31679	0.550996	0.724187	1.38289	1.61263	0.976421	0.581805	1.33172	1.28603	0.882122	1.28581	1.67184	0.784915	0.909091	1.69036	1.00417	0.322862	1.2899		1.03371	1.23534	1.38767	1.49288	1.55357	1.29143	1.32317	1.62189	0.92016	1.23155	1.04587	0.579464	1.78574	1.19977	1.17594	1.19359	10.4388	1.616	1.74593	2.29753	0.997875
	0.452383	1.35586	0.898098	0.967207	0.616352	0.352794	1.03376	0.549115	0.664773		0.970711	0.507338	0.236308	0.906542	0.545349	0.743401	0.824468	0.738794	0.715821	0.501342	0.344593	1.28352	0.75443	0.286221	0.353053	1.8313		0.394124	0.937238	0.316971	0.697273	0.407955	0.413244	1.29515	0.314219	0.804396	1.12273	0.544681	0.859193	0.6787	0.981048	0.638605	1.07	0.307042	2.15994	0.347357	0.169921	0.154795	0.802039
	1.64541	0.122149	1.07611	1.48288	1.003	1.60602	1.78571	1.75182	1.0101	1.03923	0.659367	0.49422	1.56957	1.4852	1.33561	0.633736	0.885057	1.05243	1.38589	1.08578	1.2998	0.777957	1.02767	1.18203	0.94856	0.454107	1.26324		1.33649	1.3776	1.45445	1.32773	1.57512	1.75227	1.11769	1.42483	0.97006	1.09649	0.923358	1.89565	0.63271	1.17075	1.5581	1.20528	1.79078	2.05495	2.50685	2.77749	1.07234
	1.65335	1.66638	0.795941	1.39115	1.01114	1.07425	1.22022	2.24291	1.45723	1.05401	0.639706	0.306977	1.27217	1.39728	1.72739	0.952419	1.07308	1.49388	1.11754	1.01353	1.88764	0.544713	1.25269	1.58707	0.765152	0.214165	1.77512	1.91929	0.857143	1.48189	1.50504	1.85616	1.45212	0.867133	1.42046	0.159091	0.824176	1.01695	1.00334	0.702065	1.41453	1.7452	1.46372	1.48253	0.632073	0.662818	1.15486	0.590022	1.49169
	1.25998	0.17237	0.566653	1.10229	0.785714	1.08931	1.2918	1.0459	0.62201	0.829321	0.490588	0.349227	0.889536	1.5736	0.997245	0.432718	0.748466	0.770543	1.00061	0.819034	0.903625	0.784955	1.12025	0.930207	0.879562	0.397493	1.0348	1.07683	1.45962	0.944812	0.963133	0.901871	0.858639	1.49787	0.985986	1.1861	0.992383	0.903084	1.01877	0.605246	1.17481	0.933126	1.20041	0.993355	1.2668	0.564334	0.918854	0.078392	0.951286
		0.464527		0.996984	1.03937		1.31655	1.13469	0.913333		1.22087	1.0226	1.13232	0.960307			0.9701		1.34967			0.761875	1.03111		1.22485	0.571849			1.31225		1.02131			0.853394		0.861511	1.0308	0.644248	0.972973	1.60833	0.703863	0.953923	0.979746		1.15968	0.870466	0.775148	1	0.950634
	0.666813	0.761972	0.673267	0.733657	0.589666	0.530186	0.736292	0.397322	1.12903	0.757435	1.69565	1.72189	0.368758	0.533098	0.588025	0.858547	0.548495	0.516382	0.611373	0.779646	0.52875	1.22672	0.730392	0.57064	0.47932	2.34409	0.449544	0.523024	1.04521	0.848268	0.521511	0.673515	1.07146	0.580351	0.626953	0.822967	1.06636	0.801008	1.06654	0.606811	0.230045	0.431606	0.66678	0.62137	0.367769	1.20678	0.995283	0.739496	0.836429
	0.217091	2.14382	1.11591	0.255758	0.689038	0.695458	0.494362	0.284177	1.09091	0.634723	2.10464	2.62408	0.134332	0.329635	0.348745	2.05854	0.430657	0.85052	0.748141	0.682573	0.250145	1.01428	0.830084	0.364722	0.488518	3.56861	0.391794	0.324915	1.01471	0.644613	0.401845	0.54531	0.532426	0.765432	0.539805	0.835955	1.23113	0.525667	1.08725	1.21595	0.0863536	0.410022	0.288734	0.569447	0.439962	0.619816	0.456062	0.474517	0.687018
	0.684642		1.1192		0.994048	0.60242	1.23117		0.84058	0.892772	1.86207	2.00897		1.04128	0.84793	0.915925		0.919269		0.932874	0.76447		1.26797	0.792435	1.48679		0.625383	0.563378	1.139	0.563498		0.661241	0.724089	1.02753	0.801512	1.11485	1.02535	0.8659	1.05455	0.760148				0.630884		0.495536	0.64415	0.584874
	1.44461	0.697418	0.858489	1.2921	1.46139	1.11774	1.29293	1.12249	1.26882	1.10488	0.775424	0.962264	1.27239	1.14734	1.62095	0.682237	1.48944	1.23004	1.06654	1.10105	1.55348	0.724402	1.10787	1.37352	1.52442	0.239916	1.423	1.14985	0.989619	1.10149	1.10909	1.32977	0.926256	1.09859	1.2985	1.14286	0.65678	0.42803	0.998217	0.951351	1.9953	1.39124	1.18891	1.28936	0.746495	1.22539	0.991813	1.07492	1.097
	2.23513	0.182537	1.18166	1.16755	1.0109	1.4133	1.61079	1.3263	1.1653	1.38114	0.821122	0.691596	1.5769	1.62978	1.55233	0.778361	1.16266	1.66824	1.38227	1.32923	2.4571	0.846397	1.0996	1.87997	1.27339	0.653425	1.84766	2.15368	1.44588	1.53056	1.71633	1.88871	1.62587	1.12928	1.55147	1.40832	0.882528	1.2548	1.01042	0.839356	2.57388	1.19916	1.0348	1.46605	1.64763	1.79445	1.87321	2.07489	1.04847
		0.238445		0.953384	1.0007		1.12562	0.804425	0.954806		0.938287	0.878607	0.865755	0.973524			0.872925		1.00273			1.03127	0.834404		1.43652	0.675371			1.29987		1.06244			1.25067		1.12328	1.00781	0.73269	0.969561	1.49773	1.01234	0.919546	0.767486		0.934961	1.03911	1.05755	1.21008	0.81651
	0.636398	0.144578	0.800422	1.04536	0.975037	0.822912	1.02256	0.72888	0.92638	0.75942	1.80165	1.33865	0.76995	1.12222	1.22317	0.925722	0.905405	0.736456	0.753346	0.71198	0.531356	1.56698	0.796813	0.591309	0.677519	0.822934	0.754615	0.431612	0.864646	0.540844	0.907222	0.508178	0.626372	1.01911	0.810317	1.10734	1.12326	0.582253	1.00958	1.29371	1.23647	0.777943	0.895026	0.821605	0.575127	0.696907	0.774617	0.711974	0.613932
	0.938407	0.187343	0.617485	0.654189	0.818182	0.755837	0.892704	0.684395	0.805369	0.771297	1.28636	0.991597	0.643101	0.891832	0.814657	0.633012	0.698182	0.807707	0.839658	0.76344	0.567087	1.095	0.53961	0.785016	1.08667	0.764257	0.781255	0.565456	0.836502	0.559755	1.01144	0.687861	0.595027	0.358696	0.817929	1.05045	1.06061	0.91411	1.08108	0.860759	0.84	0.727052	0.691185	0.707031	0.465096	0.535865	0.65618	0.562712	0.670623
	1.13293	1.15217	0.861685	1.34986	1.28272	1.03208	1.37186	1.95031	0.957082	1.08018	0.645711	0.812933	1.43328	0.970537	1.45172	0.777086	1.56354	1.12843	1.13722	1.07166	1.53695	0.739477	0.861	1.23581	1.2931		1.41923	0.96158	1.00966	1.00293	1.29957	1.18571	1.09338	0.79206	1.32533	1.07692	0.840614	1.18265	1.01855	0.808511	1.56294	1.5522	1.20307	1.2113	0.725899	0.984709	0.902465	0.812102	1.21589
	0.752841	0.170696	0.781888	0.735106	0.806026	0.775152	0.625589	0.569077	0.83871	0.717806	1.01801	1.21226	0.434206	0.881923	0.630611	0.58492	0.683099	0.712816	0.841168	0.672604	0.601667	1.04037	0.752187	0.648	0.424628	0.713964	0.657858	0.583355	0.791234	0.618604	0.685175	0.551478	0.645628	0.659155	0.614814	1.02381	1.09746	0.757576	0.953654	0.881081	0.434306	0.582432	0.711533	0.698943	0.425786	0.702073	0.446784	0.106515	0.727978
	1.30376	0.104	0.928364	1.18868	0.765568	0.864477	1.27466	1.24624	1.0339	0.967298	0.866571	0.792308	1.20624	0.818864	0.966053	0.75529	0.890173	1.1486	1.49027	0.968242	1.05855	0.792492	0.715548	1.13119	1.25	0.499621	1.09351	1.26738	1.12027	0.94557	0.933111	1.1385	0.901745	1.32565	1.03253	1.42092	0.965278	1.02141	1.00092	0.595719	0.888781	1.19207	1.1662	0.90858	0.262817	1.22762	1.26209	1.3696	0.896491
	0.420915	1.12603	0.612887	0.878164	0.506579	0.328538	0.656744	0.48243	0.983051	0.549961	0.922809	1.19084	0.333745	0.708765	0.212325	0.516971	0.568562	0.625671	0.55321	0.511539	0.333713	1.13801	0.594487	0.315306	0.404013	1.22352	0.274998	0.352579	0.784906	0.506234	0.561434	0.456611	0.544927	1.32675	0.419652	1.07177	1.2282	0.529712	0.92437	0.418482	0.410415	0.567676	0.787592	0.332746	1.28571	0.736612	0.991963	0.805556	0.752855
	1.23938	0.242883	0.847253	1.03356	1.08892	0.855734	1.32214	0.823537	1.0592	1.2207	1.086	0.981147	0.957339	1.63299	0.867402	0.620959	1.04421	1.32856	0.912349	1.3225	1.25886	0.951956	0.904724	1.29917	1.03997	0.565601	1.15829	1.11928	1.21222	0.962126	1.45272	1.18136	1.07184	0.985025	1.02875	1.29455	0.918356	1.04985	1.01678	0.77376	1.5622	0.972778	0.845853	0.934445	1.13915	1.01427	1.05711	1.0707	0.79087
		0.207459		0.773449	1.10236		1.02158	0.941045	1.04167		1.1699	0.977401	0.956925	0.985915			0.837209		1.1209			1.06544	1.34222		1.20907	0.857231			0.964427		0.973686			0.692308		1.19245	0.967146	1.06195	0.92973	1.16667	0.91355	0.843375	1.05809		1.46093	0.766839	0.757396	0.980952	0.872203
	0.566642	0.324334	0.846457	1.07609	0.977064	0.703702	0.780627	0.490516	0.764569	0.735793	1.40961	0.928177	0.418193	0.541991	0.528743	0.861404	0.723404	0.657744	0.616862	0.66014	0.532905	0.996533	0.546419	0.596891	0.558266	0.377514	0.60989	0.402678	0.84058	0.587154	0.760022	0.66718	0.693675	0.632314	0.750178	1.15309	1.08173	0.972536	0.993538	1.00313	0.605228	0.852527	1.0914	0.611766	0.729011	0.582543	0.60708	0.419048	0.701547
		0.170843		1.22251	0.899855		1.52525	1.8681	0.916364		0.586207	0.510481	1.45302	1.08651			0.943633		1.31859			0.712946	0.81		1.16226	0.334095			1.80822		1.25801			0.970588		1.47926	0.951594	1.10256	1.0499	0.634323	1.98054	1.48591	1.22327		1.06878	1.30032	1.35674	1.6379	1.28845
	0.144513	1.799	0.855531	0.451031	0.45933	0.437547	0.50274	0.587547	0.807601	0.429642	1.11712	1.34524	0.309606	0.217606	0.450749	1.03561		0.3866	0.287864	0.422851	0.208338	1.19847	0.907348	0.208668	0.334375		0.260323	0.172877	0.53211	0.40278	0.488804	0.357848	0.262706	0.530245	0.46061	0.746411	1.2578	0.436214	1.00177	0.581717		0.243086		0.475715	0.808099	0.282655	0.228833	0.125123	0.836694
	0.543775	0.457409	0.826118	0.785069	0.686668	0.726275	0.83842	0.582942	0.918825	0.555104	1.03943	0.822912	0.422579	0.73662	0.561601	0.929188	0.796405	0.692716	0.658122	0.570755	0.680724	1.23814	0.804148	0.42203	0.672466	1.05834	0.486165	0.447666	1.00654	0.428846	0.84958	0.55711	0.473214	0.772967	0.705704	0.937749	1.16614	0.54868	1.01353	1.72786	0.51525	0.730877	0.829974	0.553575	0.685162	0.475614	0.419027	0.462239	0.701468
	1.05383	0.337955	0.784127	1.22911	0.918919	0.895088	1.58763	1.52261	0.835052	0.822307	1.01497	1.07495	1.32702	1.83976	0.98839	0.550193	0.996656	1.01681	1.21522	0.845822	0.915156	0.979564	1.19231	0.9363	0.751361	0.274117	1.25058	0.711076	1.56055	0.772962	1.22307	0.803655	0.756411	1.55627	0.973246	0.420707	1.10427	1.06931	0.859712	1.03145	0.984189	1.1999	1.23041	0.88032	0.75788	0.630859	0.87957	0.88748	1.27824
	1.37611	0.312866	0.964668	0.595376	1.28051	1.11797	1.13109	0.639384	0.968504	1.12177	0.732084	0.946154	0.653021	1.0878	0.871481	0.891955	1.08209	1.23871	0.964904	1.1474	1.25258	1.07552	0.892308	1.19267	1.20755	0.661743	1.18106	1.10285	1.09333	1.01026	0.919179	1.17071	0.959054	1.36573	1.15265	1.00224	0.929385	1.16265	0.958217	0.892508	1.22648	0.840026	0.777755	1.11687	1.16327	0.923391	0.864035	0.891304	0.899187
	2.01971		1.02808		1.08	1.10138	1.36548		0.917808	1.0173	0.618671	0.511312		1.27289	1.13336	0.849417		1.28963		0.986838	2.27583		1.02454	1.44959	1.15953		1.41366	1.52135	0.845815	1.16756		1.23205	1.0576	0.939945	1.14666	1.25556	1.10441	1.09963	0.931533	1.02075				1.2296		1.14823	1.04577	1.28547
	0.59468	1.89454	0.9786	0.796644	0.861646	0.580672	1.02041	0.988891	0.940239	0.875858	0.957746	1.69312	0.494276	1.07221	0.742801	0.841902	1.29487	1.0757	0.88884	0.795169	0.881643	1.21155	1.11045	0.677366	0.979592	0.749604	0.535064	0.386956	0.962779	0.557042	1.35544	0.648903	0.687584	0.93617	0.92599	1.12023	1.20188	0.578947	0.975655	0.545525	0.997658	1.05429	1.0193	0.590203	0.80479	0.306306	0.301796	0.331978	1.26452
	1.11745	0.140975	0.902611	0.911234	1.0639	0.631656	1.275	1.06641	0.808163	0.875107	0.931727	1.00929	0.788825	1.10975	0.452111	0.506345	1.26744	0.717283	1.08835	0.906869	1.05913	0.794214	0.786571	0.846413	1.16115	0.512758	0.611436	0.874582	2.03667	0.755239	1.04911	0.78886	0.662771	0.924812	0.87414	1.24337	1.13494	0.921875	1.09524	0.631579	1.24518	0.989889	0.917825	0.688376	0.734521	0.873638	0.940629	0.848592	0.897764
	1.13567	1.04506	0.696303	1.09827	1.18919	0.773085	1.189	1.15368	0.994845	0.810951	1.05318	0.723769	1.66132	1.0366	0.804644	0.55932	1.49833	1.00294	0.945361	0.823789	1.27439	0.786436	0.814103	1.128	1.16878	0.240429	1.13983	0.876008	0.927336	0.834136	1.07636	0.942345	0.753587	0.550482	1.06015	0.843434	1.03318	1.32178	1.07194	0.893082	0.995284	1.30359	1.00948	0.978978	0.493553	0.951172	1.00215	1.01109	1.05728
	1.57465	0.10372	0.849169	0.907388	0.749175	0.901425	0.989967	0.62473	1.02251	1.07224	1.56873	0.567359	0.849332	1.35199	0.88839	0.584811	0.862191	1.21045	0.750292	1.1475	1.45926	0.978074	0.788644	1.3086	1.01288	0.52561	1.06786	1.42708	1.15254	1.07804	1.1412	1.23556	0.983985	1.08276	0.902808	1.05292	0.950745	1.05837	1.04277	0.7568	1.29314	0.775634	0.775385	1.0482	1.09342	1.2381	1.35301	1.47126	0.6799
	0.922025	0.377185	0.582882	0.545259	0.787068	0.690292	0.723288	0.432624	0.848771	0.613771	0.936975	0.609524	0.502064	0.891958	0.782501	0.551869	0.778947	0.633529	0.73945	0.6712	0.688414	1.22252	0.846361	0.683067	0.717391	1.44606	0.646236	0.700564	1.23324	0.573313	0.810001	0.643325	0.591021	0.738318	0.658021	0.955224	1.0203	1.05178	0.997563	1.05199	0.615739	0.558427	0.743325	0.653997	0.564714	1.07551	1.57295	0.707071	0.698547
	0.208264	3.57039	1.68783	0.310342	0.686016	0.560322	0.46747	0.40098	1.20128	0.69055	1.8412	2.41494	0.348693	0.31477	0.362573	1.92769	0.530726	0.434213	0.332994	0.705009	0.311485	1.07803	0.827586	0.381164	0.322022	3.0737	0.321862	0.40447	0.902439	0.571431	0.467971	0.561126	0.596094	0.458543	0.554684	1.31019	1.15238	0.508832	1.02425	1.00641		0.364189	0.454207	0.505859	0.543877	1.01875	0.92779	0.712716	0.613659
	1.08461	0.136595	0.66883	1.01476	1.02947	1.02207	0.931298	0.902707	0.843188	0.721084	0.627848	0.655391	1.03452	1.32409	0.814233	0.492598	1.159	0.959473	0.90461	0.789615	1.13655	0.630931	0.796053	0.973839	1.16599	0.344249	1.18335	0.894948	0.919861	0.793874	1.03912	0.807261	0.710436	0.756808	0.98583	0.954774	0.947603	0.927602	1.03202	1.18023	1.06434	0.826508	1.06591	1.09885	1.38364	1.07098	1.19448	1.15498	0.750969
	1.2471	0.276002	0.771195	0.937405	0.899522	1.01423	0.910959	1.25386	0.983373	0.968722	0.759459	0.873016	1.87486	0.781405	1.01213	0.609461	0.642857	0.881159	0.963449	0.969655	1.2139	0.536167	0.634505	1.07881	1.23611		1.22273	0.907119	1.09567	0.920137	0.569225	1.0877	1.07623	1.08108	0.978871	0.990431	0.989595	1.22634	0.998227	0.764543	0.851543	1.07649		1.09028	0.939261	0.997859	0.974828	0.965517	1.17616
	0.680262	0.193237	0.687655	0.708593	0.848168	0.91742	0.959696	0.601134	0.909871	0.88265	0.777996	0.91455	0.858871	0.856153	1.41299	0.530734	1.03867	0.709156	0.860858	0.847859	1.01176	0.618438	0.635	0.814175	0.952586		0.743095	0.678033	0.755048	0.795134	0.678154	0.807565	0.749571	0.41966	0.802672	0.950226	0.996458	0.936073	0.974026	0.742317	0.57176	0.70295	0.724043	0.819919	0.340278	0.701325	0.713826	0.713376	0.561265
	1.42413	0.364299	0.701337	1.20316	0.890459	1.0042	1.59133	1.84116	0.926829	0.896562	1.10423	0.937093		1.80685	0.837051	0.542807	1.29154	0.920469	1.09906	0.888669	1.10045	0.566853	1.21173	1.04891	1.0929		1.30291	1.12122	1.28474	0.979081	1.12771	0.943127	0.881579	1.41092	1.17541	1.06576	0.992823	1.0754	1.0631	0.908078	1.65607	1.21481		1.00933	0.654864	1.31385	1.34491	1.45622	1.57346
	0.550214	0.316291	0.882576	1.08724	0.922523	1.02399	1.14089	0.963533	1.00515	0.900303	0.836345	0.856531	0.853256	1.32938	0.759066	0.639702	0.755853	0.534328	0.82224	0.871307	0.473776	0.847519	1.21154	0.676329	0.569873	0.908668	0.494572	1.03425	1.05536	1.05232	0.835433	0.892072	1.41099	1.94855	0.768453	0.381313	1.29384	1.0396	0.838129	1.25157	0.899861	0.722249	1.4111	0.826197	3.56948	1.01367	1.21505	1.37559	1.07018
	0.582459	0.347439	0.796264	0.914414	0.96319	0.784505	0.634965	0.658161	1.23788	1.0389	1.23077	1.31878	0.709547	0.785714	1.12737	0.59248	1.03971	0.902579	0.889856	1.02677	0.816554	1.14597	0.59322	0.787132	0.880829	0.555157	0.78064	0.618705	0.754023	0.784174	0.940554	0.751668	0.84456	0.831667	0.760142	0.979775	1.07803	0.956357	1.05253	1.01026	0.985213	0.792044	0.76043	0.897248	5.38138	0.380056	0.387031	0.371105	0.640923
	1.32491	0.109991	0.609261	1.02908	0.9	0.886782	1.21053	1.22418	0.876812	0.894986	1.11098	0.908397	1.46594	1.10402	0.943136	0.530101	1.02299	0.956301	1.07154	0.930814	1.66894	0.846684	0.7792	1.14559	1.32026	0.307178	1.26496	0.983814	1.03518	0.823377	1.14378	0.94264	0.74059	1.17622	1.01848	1.29187	0.946882	1.08929	1.07115	1.01796	1.47922	1.12885	0.952471	0.997485	1.86729	0.953878	1.02376	0.879765	0.874626
	0.697246	1.91456	0.956778	0.668051	0.863971	0.443913	0.552408	0.435378	0.860465	0.880009	1.82419	1.31546	0.426196	0.665331	0.646552	0.941291	1.00292	0.740623	0.799025	0.871404	0.781412	1.06825	0.936842	0.710775	0.74276	1.10393	0.400521	0.759852	0.577825	0.726857	0.626689	0.63195	0.700438	0.817745	0.639302	1.06952	0.804147	0.693642	1.00266	0.376506	0.434151	0.685031	0.875145	0.521413	1.23037	0.992383	1.05855	0.822785	0.861307
	0.140704	3.85157	1.00503	0.381142	0.60101	0.456035	0.521437	0.395419	1.20825	0.555417	2.22906	1.81775	0.247679	0.316384	0.240737	1.6017	0.654723	0.662266	0.440746	0.467491	0.233757	1.35468	1.36111	0.284327	0.179368	3.49831	0.32243	0.236735	0.598131	0.483388	0.344787	0.456507	0.303176	0.877863	0.431385	0.927473	1.31257	0.514019	1.05622	0.850856		0.477049	0.452992	0.46026	0.431132	0.404361	0.382353	0.248377	0.674345
	1.55099	0.137255	0.77834	1.18273	1.28657	0.898084	1.11029	1.06431	0.830769	1.04993	0.467463	0.430116	1.90508	1.10089	0.618622	0.612553	1.47573	1.40685	1.25488	1.12742	1.75426	0.861679	0.776959	1.34376	1.28163	0.296496	1.63936	1.62346	0.993166	1.21638	1.2184	1.4101	1.19584	0.79529	1.1377	1.26596	0.943353	1.35915	1.06706	1.04965	1.89116	1.29243	1.08187	1.20304	1.14988	1.21398	1.31066	1.39086	0.968629
		1.60325		0.833224	0.765957		1.34426	0.977047	0.777778		1.19494	1.62353	0.45624	0.911688			1.18106		0.700303			1.03821	0.877076		1.02581	0.316293			0.904429		1.00097			0.807571		0.981221	1.06308	0.746269	1.0863	0.644776	0.742149	0.946899	1.19497		1.3958	0.312815	0.385776	0.175128	1.16463
	1.03814	0.493327	0.887626	1.27983	0.916031	0.710411	1.13258	1.14684	0.724458	0.785179	1.04799	1.00474	0.965102	1.34493	0.375551	0.608319	0.907801	0.794744	1.12437	0.845544	0.874887	1.19679	0.853333	0.730531	1.02642		0.680883	0.788199	1.1442	0.756531	1.12158	0.673633	0.68405	1.06596	0.771631	0.930362	1.11338	0.677612	1.02632	1.06859	0.732603	1.06192	1.06012	0.692816	17.498	1.07625	1.15307	1.12378	0.99763
	1.19281	0.162579	0.664858	1.11087	0.738602	1.08778	1.23238	1.08084	0.975806	1.13898	1.57391	1.09467	1.4936	1.01324	1.46966	0.476923	0.923077	1.06429	0.989987	1.30198	1.47454	0.860756	0.848039	1.16637	0.917847	0.343971	1.34041	0.724067	1.08861	1.01236	1.09334	1.15382	0.913779	1.02456	1.15864	1.33493	1.00686	0.901763	0.991565	0.848297	1.0352	1.0738	1.05687	1.00385	0.566804	0.757062	0.955189	0.90084	0.997411
	1.35558	0.171903	0.818252	1.45418	1.08257	1.11679	1.27164	1.65274	1.32673	1.11125	1.10995	1.16875	1.03519	1.2987	1.39077	0.632903	1.06699	1.34919	0.859163	1.26666	1.45304	0.729211	0.69375	1.33819	1.6435	0.273884	1.27569	0.928503	0.956835	1.18384	1.46527	1.1251	1.0285	1.02307	1.32954	0.955294	0.976134	1.14286	1.03002	0.898649	1.03691	1.29039	0.808193	1.25758	0.950536	0.736111	0.82563	0.808955	1.04784
	1.20428	0.143166	0.825827	0.740419	0.896989	0.868593	1.20599	0.784682	0.905512	0.930052	0.798236	0.846154	0.975239	1.10732	1.02489	0.584294	0.947761	0.88343	0.959702	0.972015	1.47155	0.972638	0.969231	1.01166	1.13208	0.565066	1.13069	0.725884	1.32267	0.834258	1.04397	0.950919	0.818918	0.789232	0.943087	1.0962	0.938497	0.951807	0.969359	0.899023	1.11216	0.934589	0.799191	0.877963	3.5551	1.15015	1.20175	1.30745	0.911319
	1.30626	0.154036	1.13952	0.997971	1.10855	1.02236	1.03111	0.969573	0.882129	1.01375	0.52358	0.701043	1.44023	1.38806	1.2026	0.685616	1.67176	0.910453	1.24362	1.13592	1.45703	0.847628	0.82931	1.08595	1.03673	0.331391	1.2332	1.23975	1.79941	0.951579	1.17959	1.0528	0.972378	1.01106	1.10707	1.10448	1.14085	0.664646	0.978846	0.703947	1.11847	1.03521	1.22306	1.01365	0.775357	1.15598	1.12316	1.12459	1.01828
	1.3589	0.104898	0.703472	0.952828	1.03808	0.729085	1.11927	1.22455	0.996825	0.999469	0.554455	0.679868	1.54816	1.19032	0.523275	0.489065	1.24901	1.27573	1.13297	0.853476	1.55384	0.827273	1.20592	1.23671	0.971631	0.276735	1.45414	1.19198	0.760976	1.05574	1.17749	1.14168	1.17761	1.05227	1.08754	1.33542	0.875413	0.805281	1.01654	0.876093	1.78829	1.14765	0.840983	1.03305	1.45972	1.17017	1.16953	1.25811	1.02572
	1.55926		0.954128		1.22769	2.14261	1.14721		1.27397	1.26711	0.699367	0.742081		1.18047	1.69283	0.687634		1.4055		1.18772	1.66256		1.27607	1.18595	0.941634		1.44591	2.28492	1.58884	1.65598		1.3291	1.47959	1.34435	1.30243	0.872222	0.983854	1.20295	0.881389	2.56432				1.62099		1.30531	1.34325	1.67863
	0.840243	0.886603	0.632659	0.692765	1.04596	0.44579	0.864198	0.923478	1.24198	0.569738	0.831418	0.78628	0.564885	1.08908	0.307968	0.450844	0.915789	0.591989	0.935477	0.563555	0.587461	1.50792	0.871935	0.599947	0.983213	1.21546	0.327749	0.670502	1.0549	0.526961	0.997556	0.522893	0.353318	0.767593	0.51368	1.31353	1.01975	0.971875	1.00895	0.851312	1.26104	0.850611	0.974148	0.451244	0.530086	1.72185	1.1803	1.40656	1.18916
	1.38069	0.0744772	0.579036	1.0947	0.696875	0.72283	1.20555	1.33943	0.854167	0.800562	0.982418	0.476259	1.5142	1.12329	0.946765	0.417335	0.827586	0.987831	1.23885	0.828141	1.01041	0.838434	0.967498	1.00489	0.859316	0.192014	1.05245	1.17924	1.3557	0.893614	1.03118	1.07329	1.00891	1.05184	1.01387	1.35829	0.936027	0.797297	1.02521	0.492	1.44222	1.22428	1.05335	0.841697	0.796477	1.19879	1.22727	1.46226	1.1083
	1.53833	0.196151	0.945593	1.16162	1.08231	1.64449	1.19534	1.16957	1.01195	0.960621	0.856338	0.692534	1.66996	1.43014	1.41226	0.697951	1.48718	1.05537	1.15156	0.924409	1.38948	0.685801	0.81791	1.1602	0.626939	0.376543	1.49126	1.18864	1.37965	1.07172	1.38766	1.01287	0.812416	1.52482	1.19986	0.938416	1.05634	0.729825	0.919476	2.01556	1.42857	1.03404	1.07517	1.37634	0.462275	1.05856	1.17365	1.32717	0.981203
	1.72376	0.153277	1.02699	1.35343	1.11246	1.38181	1.51639	1.41625	1.11111	1.34041	0.915443	1.05098	1.7825	1.59221	1.50216	1.02554	1.55432	1.159	1.13862	1.43996	1.50641	1.04062	0.910299	1.48408	1.32903	0.329224	1.32642	1.18239	1.23543	1.10495	1.51355	1.09237	1.4097	1.40221	1.3081	1.16901	0.925234	0.991045	0.900563	1.23582	1.36272	1.24186	0.954927	1.29691	1.01119	0.91221	0.915948	1.03237	1.1657
	0.970358	0.727903	0.835737	1.08182	1.07748	1.05308	1.43643	1.21454	1.2268	1.09729	0.616417	0.573876	1.30369	1.44807	1.29339	0.64547	1.27759	1.13241	1.11856	1.07661	1.43945	0.804626	1.15385	1.21069	0.424682	0.346384	1.41341	0.920339	1.35986	1.01377	1.14853	1.16823	0.915038	1.18971	1.27235	1.05051	1.31043	1.21287	0.890288	1.00629	1.58169	1.35712	0.987812	1.17763	0.905444	0.558594	0.468817	0.383518	0.984202
	1.1179	0.214274	0.986215	0.935582	0.998117	0.963959	0.740741	0.579047	1.06452	1.00726	0.823093	0.971698	0.554368	1.0512	1.50561	0.703198	0.869718	0.999831	0.730231	1.03768	0.94144	0.943051	0.676385	0.987644	0.921444	0.655519	0.813371	1.26243	0.862745	1.05052	0.75865	0.996734	1.03641	0.73615	0.886819	1.38095	1.00636	0.833333	1.00357	1.00541	0.699824	0.659647	0.666202	1.00063	0.543755	1.54663	1.42456	1.45603	0.675425
	0.167173	2.25622	0.844825	0.388636	0.587361	0.419729	0.559809	0.418893	0.985646	0.387974	1.49091	1.62456	0.269663	0.292	0.301838	1.06338	0.328302	0.431944	0.409035	0.439522	0.209162	1.48032	0.903846	0.275355	0.432709	3.21458	0.273919	0.27684	0.534378	0.422847	0.610988	0.361858	0.450433	0.262661	0.505395	0.708241	1.24299	0.437984	0.967391	0.58445	0.0490951	0.401852	0.873715	0.482887	1.96762	0.390873	0.217439	0.196636	0.976016
	0.923708	0.124022	1.04998	0.903743	0.936675	0.701306	0.915663	0.908534	0.875399	0.951868	0.914845	1.11203	0.841283	1.02906	0.789296	0.980306	0.703911	0.684482	0.857609	0.949019	0.865236	1.17637	0.722605	0.821888	0.866426	0.833319	0.877426	0.627603	1.0878	0.695869	1.07844	0.719556	0.80468	1.19724	0.832537	1.10185	1	0.883191	1.07468	1.07692	1.19735	0.898059	1.08258	0.7433	0.56702	0.777083	0.693654	0.643642	0.720724
	0.418804	2.64629	1.37838	0.340545	0.681188	0.860511	0.430387	0.344638	0.928571	0.768636	1.2009	1.43043	0.384888	0.502846	0.71871	1.91256	0.53886	0.926398	0.472581	0.751825	0.497981	1.11943	0.857143	0.513174	0.295779	2.36004	0.472481	0.677705	0.618016	0.996367	0.366914	0.740389	0.766635	1.30405	0.828551	0.877193	1.26959	0.61573	0.981752	1.26627	0.203136	0.430519	0.499306	0.763917	13.8734	1.03568	1.01839	1.22363	0.531839
	1.4689	0.142519	0.285714	1.2917	1.00382	0.939343	1.29286	1.42529	0.877863	0.764462	0.572917	0.450771	1.32038	1.33573	0.946023	0.242762	1.53125	0.897661	1.35277	0.743294	1.32307	0.75941	0.807571	1.07514	1.20816	0.387711	1.05077	1.09002	1.40166	0.885877	1.18959	1.00735	0.900268	1.54198	0.980327	1.10512	0.969422	1.05929	1.02104	1.35055	1.65426	1.13048	0.943012	0.975986	1.7286	1.26582	1.25211	1.32601	1.06091
	2.12238	0.173197	0.75342	1.17788	0.927577	1.1318	1.18881	1.47508	1.03727	1.07732	0.502609	0.631268	1.67225	1.0229	1.2849	0.671235	1.33333	1.04843	1.12199	1.10837	1.84525	0.608279	0.632911	1.35532	1.27684	0.370993	1.73646	1.50716	1.10661	1.29265	1.28933	1.2784	1.30266	1.34562	1.40761	1.24566	0.915493	1.21569	1.03299	0.672783	1.57846	1.11352	1.49531	1.33297	0.552206	1.17974	1.29361	1.38117	1.04229
	1.16062	0.221001	0.675234	0.627537	0.831683	0.542081	1.19732	0.836785	0.771704	0.878472	0.896676	0.886647	0.645542	0.93469	0.554307	0.673982	0.742049	0.73001	0.892542	0.888383	1.37514	1.24141	0.687697	0.76008	1.05579	1.0743	0.699658	0.78909	1.12429	0.722884	1.02295	0.679623	0.74903	0.684828	0.642379	1.06407	1.09737	0.746304	0.979072	0.976	1.33245	0.753774	0.819487	0.625658	0.519737	1.01587	1.03567	1.00766	0.735528
	0.988419	0.0792271	0.839595	0.961156	0.971204	0.817782	0.854753	0.332163	1	0.911194	1.01768	0.86836	0.371701	1.06759	1.24352	0.734564	0.690608	0.835454	0.941599	0.914137	0.790629	0.437831	0.912	1.02465	0.788793		0.935904	0.750568	1.39596	0.784056	1.05422	0.883808	0.72038	1.27788	0.997289	1.04525	0.970484	0.86758	1.04082	1.35225	0.882025	0.769953	0.931698	0.931746	1.03145	1.01733	1.03537	0.980892	0.534161
	1.7999	0.202697	0.641924	1.30702	1.02985	1.43901	1.56049	1.57309	0.935897	0.851362	0.557488	0.525634	1.63156	1.44241	1.24355	0.373457	0.957655	0.795783	1.11391	0.938303	1.45513	0.887939		1.04616	0.941176	0.212172	1.11019	1.53463	1.32179	1.19022	1.40823	1.11028	1.07646	1.33265	0.814846	1.08134	1.00235	1.09402	0.928641	1.8806	1.3126	1.16518	1.27589	1.17985	0.599919	1.13441	1.22874	1.44554	1.3843
	1.53375	0.198572	0.603764	0.838147	0.903553	0.968657	1.12258	0.775181	1.00334	1.13415	1.10211	1.01198	1.22194	1.07768	0.96758	0.499741	0.956938	1.1308	1.08613	1.18579	1.57761	0.533333	0.850909	1.12883	1.14286	0.604767	1.53775	0.969509	1.3792	1.07226	1.12242	1.08521	0.982462	1.0367	1.12322	0.937355	0.995215	1.07003	0.996219	0.628049	1.15261	0.859146	1.18766	1.13627	0.71115	0.896947	0.777663	0.775106	0.822154
	2.08096	0.189338	0.646602	1.17142	1.04179	1.21486	0.955882	1.0411	0.941538	0.87279	0.366534	0.240154	1.62804	1.30267	0.850903	0.608852	0.864078	1.05417	1.03152	0.913804	1.46246	0.394216	0.706912	1.14144	1.40408		1.38812	1.68831	1.23007	1.32524	1.03042	1.26291	1.48305	0.894928	1.08289	1.12766	1.01965	1.09155	1.0068	1.48936	0.842566	0.983505	0.972201	1.18931	0.892272	1.26271	1.30839	1.71574	0.680466
	1.2744	0.110722	0.74488	1.08863	1.08815	0.960836	1.36292	0.853891	1.02419	1.09108	0.930435	0.905325	1.04738	1.41218	1.1478	0.713782	1.03679	1.2164	0.855219	1.16013	1.35777	0.615993	0.686275	1.17819	1.41076	0.384297	1.01999	0.604611	1.98553	1.00789	1.04617	0.957779	0.869874	0.669474	1.09769	1.14833	1.00229	1.02267	1.0253	0.804954	1.12583	1.12517	0.756408	1.10421	0.35124	0.564972	0.759434	0.702521	0.817742
	0.794432	1.99137	0.871912	1.19404	0.694079	0.480121	1.2	1.21818	0.702662	0.648487	0.794995	0.909618	0.511662	1.3408	0.577848	0.727482	1.16031	0.515174	0.852795	0.638423	0.673436	1.41552	0.855172	0.552056	1.20816	0.922016	0.46745	0.628807	1.07965	0.578582	1.26696	0.548425	0.475399	1.09617	0.627071	1.06468	1.11737	0.693603	1.05385	0.973684	1.06181	1.02313	1.03742	0.564339	0.790383	1.03419	1.08927	0.954098	1.16784
	1.62425	0.423947	0.908916	1.15491	1.11875	1.36574	1.12598	1.62397	1.22917	1.08203	1.20879	1.06475	1.3102	1.25	1.73428	0.941041	1.05419	1.21023	0.921556	1.06296	1.18644	0.872286	0.769463	1.37659	1.1711	0.345268	1.50299	0.918408	1.72483	0.870153	1.3293	0.955431	0.741323	1.0311	1.28022	1.17647	0.945006	0.912162	0.98226	1.26667	2.65236	1.25472	0.799267	1.35909	0.913894	0.587286	0.654959	0.745283	1.35405
	1.52274	0.155171	0.889381	1.13263	0.98427	1.09843	1.41274	0.831264	0.988372	0.967908	0.675852	0.497778	1.23989	1.2763	1.42898	0.604065	1.01918	0.969939	0.67007	1.09128	1.35143	0.617949	0.661064	1.19078	1.34538	0.419027	1.09466	1.17178	1.05182	1.08627	1.1869	1.14727	0.971629	0.637104	1.05023	0.821596	0.918794	0.945946	1.074	1.25874	1.44502	0.962664	1.04822	1.20252	0.570144	1.3318	1.43602	0.539741	0.8338
	1.47421	0.174804	0.638587	1.25099	0.657382	0.659822	1.27273	1.15888	0.993789	1.06002	0.67913	0.80236	1.30562	1.0687	0.97769	0.610775	1.48148	1.09895	0.956462	1.11224	1.48063	0.897334	0.721519	1.28437	1.19774	0.280576	1.26843	1.01733	0.923077	1.07491	1.35242	1.16048	1.09927	0.585253	1.14376	1.21588	0.976526	1.03081	1.04241	0.642202	1.30628	1.44901	1.15113	0.986747	1.08676	1.15789	1.26544	1.26756	1.02734
	1.02131	0.111673	0.689347	0.93454	0.814925	0.504586	1.2	1.07741	0.910256	0.907478	1.10145	1.04225	1.08729	1.25229	0.512678	0.55167	1.23779	0.995016	1.11694	0.878752	1.18529	0.835341		1.04552	1.14216	0.266298	1.0237	0.710142	1.24387	0.747447	1.18915	0.821231	0.808911	0.75756	0.882888	1.13876	0.985882	1.09972	1.11241	0.770149	1.19749	1.19186	0.776219	0.750946	0.455026	0.810296	0.807692	0.775106	1.02747
	0.287056	0.493993	0.789468	0.23309	0.874016	1.21426	0.517692	0.439821	1.14216	0.950976	1.58776	1.40045	1.00155	0.773481	1.1794	0.578404	0.483965	0.535155	0.840659	0.988624	0.429085	1.07957	0.835616	0.678911	0.466281	1.85545	0.585976	1.2383	0.747863	1.45193	0.48044	1.25186	1.91795	1.49474	0.80166	0.756381	1.16243	0.662474	0.973756	1.00271	0.0478138	0.431015	0.501098	1.00765	0.724404	1.24594	1.04895	1.37187	0.901269
	0.803864	1.16464	0.886913	0.677311	0.857658	0.539993	1.07904	0.847502	0.78866	0.763295	0.836345	0.946467	0.566569	0.98912	0.509961	0.751989	1.13712	0.803527	0.873098	0.726876	0.88951	1.17269	0.961538	0.775083	0.892922	0.390653	0.598087	0.882213	0.955017	0.774234	0.960859	0.760544	0.842786	0.449518	0.739582	1.07576	1.06398	1.22772	0.971223	0.513208	1.40083	0.904215	0.801702	0.63874	0.426218	0.828125	0.890323	0.81141	0.924664
	0.129053	2.04566	0.586915	0.360792	0.496094	0.339673	0.426846	0.306839	0.849885		1.46912	1.5828	0.206658	0.283598	0.150368	0.858464	0.388128	0.408371	0.311768	0.373556	0.123187	1.06949	0.741214	0.185958	0.128889	2.89557	0.20127	0.145179	0.433136	0.3318	0.5105	0.299707	0.380933	0.371212	0.383363	0.628743	1.24138	0.355274	0.97861	0.558721		0.319137	0.529245	0.371438	1.36243	0.0971134	0.17245	0.110016	0.777688
	1.67094	0.168101	0.552017	0.890368	1.13257	0.998666	0.931754	0.920511	0.914894	0.98355	0.466368	0.4875	1.34586	1.12836	1.09664	0.567816	1.20213	1.01799	1.15631	1.08775	2.30803	0.775017	0.923858	1.17358	1.37607	0.479895	1.24009	1.11473	1.81333	1.02922	1.3605	1.12364	0.98606	0.764767	1.13745	1.21283	0.973451	1.37557	0.685221	0.786561	1.61154	1.01201	0.769805	1.12094	1.31977	1.15789	1.16516	1.26065	0.808326
	1.83825	0.131812	0.65625	1.16019	1.28061	1.17063	1.30492	1.30881	1.03828	0.889546	0.577296	0.543046	1.04887	1.50863	0.828926	0.445616	0.867076	0.914738	1.00667	0.876706	1.08338	0.799253	1.13924	1.10846	1.0438	0.343275	1.17139	1.57141	1.05727	1.22389	1.10275	1.13695	1.10469	1.6766	1.00633	1.16129	0.89445	0.969163	0.832887	1.07541	1.36047	1.03062	1.04247	1.15355	0.316789	1.23025	1.05489	1.30653	1.02908
	0.943866	0.0934516	0.672073	0.595455	0.693878	0.970975	0.651148	0.469938	0.889952	0.83947	0.84769	0.697572	0.833758	0.84467	1.04959	0.596426	0.625767	0.70926	0.751941	0.785096	0.890423	0.808398	0.759494	0.856924	0.890511	0.557906	0.84166	0.781859	0.82232	0.813605	0.656845	0.840395	0.765294	0.589787	0.864178	0.808933	1.02285	0.9163	0.956211	0.92459	0.830131	0.515948	0.711203	0.873878	0.900197	1.30474	1.46778	1.72194	0.455777
	1.05458	0.518736	0.760421	1.12567	1.09278	1.19657	0.960317	0.997366	0.897925	0.928392	1.34825	1.11669	1.07866	1.26483	0.639554	0.62656	1.22727	0.855537	1.0426	0.899228	0.713631	1.11379	0.778082	0.916203	0.864028	0.669398	0.844752	0.74033	1.39381	0.717015	0.860122	0.658779	0.53094	1.41228	0.80036	0.693458	1.10387	0.595412	0.937063	1.62679	1.55998	0.850289	0.991801	0.90915	0.790164	0.944928	1.12587	1.13497	0.911285
	1.56239	1.07789	0.665533	1.07839	1.04822	0.889984	1.06751	1.42879	0.676136	0.864531	0.423192	0.311111	1.67241	0.802181	1.06561	0.545589	0.840426	0.965432	0.805662	0.823678	1.39401	0.595029	0.739241	1.26541	1.30916	0.129521	1.35783	1.10869	0.840167	0.951769	0.773205	1.07575	0.855778	0.785903	0.952713	0.874725	1.12045	0.940426	0.990135	0.658484	1.26114	1.24495	1.00552	1.08507	1.08789	0.895361	1.22783	0.965753	0.976211
	1.29481	2.3825	0.921911	1.34165	1.45493	1.21846	1.42616	1.40475	1.06818	1.05622	0.943216	0.637317	1.83164	1.419	1.17947	0.953947	1.28723	1.48627	1.15075	1.01079	1.40898	0.612242	0.972152	1.43618	1.33588	0.178973	1.64418	1.2822	0.964017	1.11565	1.15302	1.41137	1.41123	1.63877	1.34626	0.989011	0.968182	1.22128	0.997309	1.23466	1.95127	1.43896	1.13336	1.332	0.741356	1.01402	0.832772	0.873288	1.25607
	1.26667	0.317195	0.375255	0.862571	0.998058	0.764721	1.11864	1.17416	0.987835	0.669709	0.610442	0.6	1.1659	0.791993	0.949453	0.285671	1.02743	0.762863	1.01748	0.628222	1.52997	0.454714	1.02591	0.913284	1.09948	0.248011	0.922019	0.988523	0.943574	0.885156	0.927358	0.954761	0.694318	0.856115	1.14477	1.23967	1.08665	1.14628	1.08148	0.612121	1.48568	1.06382	0.841234	0.936487	1.26972	1.30195	1.25142	1.13746	0.956069
	0.327636	2.73888	1.96446	0.524645	0.706625	0.813837	0.635398	0.514964	1.25482	0.83878	1.0134	1.45404	0.406364	0.39196	0.540921	3.02181	0.468354	0.787519	0.342328	0.897354	0.309656	1.62585	1.06173	0.43317	0.227848	3.24277	0.459947		0.65641	0.953484	0.433713	0.777489	0.831165	0.471698	0.768274	1.17329	1.08167	0.545813	1.03036	0.951691		0.48244	0.850673	0.660789	4.49494	1.24156	1.28527	0.784404	0.935455
	1.33779	0.730404	0.625884	1.03432	1.16746	0.746673	1.30945	0.925662	0.972163	0.986254	0.795393	1.00268	1.23173	1.40987	0.791574	0.632602	1.08264	1.17637	1.05832	0.970106	1.56192	0.73611	0.803109	1.24543	1.11029	0.310941	1.29261	0.932198	0.989418	0.848089	1.12834	1.02294	0.775715	0.454839	1.12743	1.06538	0.970046	1.09172	1.0791	0.802292	1.70027	1.28389	1.25529	1.02611	2.39598	0.959446	1.08115	0.51981	1.11818
[truncated: 461 more rows]
[truncated: 8 more columns]
