# Supplementary material for: The Swine Plasma Metabolome Chronicles "Many Days" Biological Timing and Functions Linked to Growth
Source: PLoS One. 2016 Jan 6;11(1):e0145919. doi: 10.1371/journal.pone.0145919 (PMC4703299; doi:10.1371/journal.pone.0145919)
Supplement: S12 Table — (XLSX) [file pone.0145919.s019.xlsx]

## Sheet: S12_Table
Table S12: Raw data are provided for serum sncRNA following a multidien 5-day rhythm (see Table S9)
	Pool 1	Pool 2	Pool 3	Pool 4	Pool 5	Pool 6	Pool 7	Pool 8	Pool 9	Pool 10	Pool 11	Pool 12	Pool 13	Pool 14
ACTTAGCTGTGCGAAACGGTCCTGTAAGCAG	8.5	24.7	20.4	4.8	16.4	12.7	18.4	5.6	0	8.2	21.4	23.7	14.4	12.1
TTGTGCTACGATCTGCTGAGGTTCAGCCTTTGTTCTCGGATTT	40.5	57.7	25.5	19.1	30	28.5	26.3	29	0	32.7	23.8	62.4	23.7	21.9
GTGGCTGTGGCATAGACCTCAG	24.8	11	25.5	14.3	21.8	41.2	39.4	30.3	12.7	9.8	31	38.7	14.4	13.8
GGGTCGGGGCGGGGCGGACTG	28.7	27.5	50.9	57.2	46.4	28.5	26.3	25.3	38.2	39.2	33.3	34.4	20.1	48.6
TGGACGTTGGCTCTGGTGGTGA	28.1	16.5	20.4	19.1	38.2	41.2	44.6	16.7	25.5	19.6	42.9	23.7	17.2	16.2
ATAGACGGACAAGAATAG	37.2	30.2	20.4	23.8	13.6	28.5	42	38.3	12.7	21.2	11.9	34.4	28.7	21
GGGCTGGGTCGGTCGGGCTGGGGCG	32.7	30.2	54.3	76.3	68.2	53.9	36.8	37	51	53.9	52.4	36.6	30.9	42.9
CCCCCCCCAACCACGTTTGACTGACTG	14.4	22	11.9	47.7	30	33.3	15.8	22.2	51	26.1	4.8	25.8	27.3	29.9
AATTCCGTGAATCATCGAATCTTTG	38.5	35.7	25.5	28.6	32.7	25.4	44.6	31.5	0	29.4	21.4	55.9	21.5	14.6
CAGTAATGCATTAAGCTAACCAGTACTAATTGCCCGTACGGCT	30.7	24.7	18.7	9.5	8.2	25.4	21	3.7	0	14.7	64.3	30.1	8.6	22.7
TCCCTGTCCTCCAGGAGCTC	170.5	123.7	188.5	119.2	188.2	209.3	162.8	153.1	38.2	99.7	178.6	165.6	82.6	80.9
ATTCAAGTAATCCAGGATAGGCT	56.8	33	66.2	23.8	32.7	42.8	42	67.9	12.7	26.1	33.3	71	38.8	20.2
TGAGGTAGTAGGTTGTGT	55.5	41.2	28.9	28.6	30	34.9	52.5	51.9	0	26.1	38.1	34.4	17.2	13
GTTATATGGTCAAGCGAAT	20.3	30.2	22.1	391.1	867.5	3.2	10.5	314.9	1376.8	1066.9	423.8	621.7	1211.2	1523.3
AGGATCCAGCATTGCC	24.8	22	35.7	42.9	40.9	44.4	34.1	88.9	76.5	39.2	33.3	66.7	82.6	84.2
CAGTGGTTTTACCCTATGGTAA	98.7	79.7	100.2	23.8	35.5	90.4	55.1	90.8	38.2	37.6	78.6	62.4	41.6	16.2
AAATCTCCAGTAGAACAAAAGGG	126.1	134.7	78.1	76.3	122.8	144.3	147	106.8	51	109.5	119.1	90.3	89	72
CTGACCTATGAATTGACAGACA	3.9	11	6.8	0	0	7.9	5.3	11.7	0	3.3	2.4	8.6	7.2	4
TCAGGCTCAGTCCCCTCCCGATT	260.7	272.1	241.1	276.7	401	388.5	354.5	246.9	127.5	232	335.7	245.2	168.7	129.5
GGTCGCCCGGGGACGCCGGG	55.5	74.2	50.9	95.4	81.8	63.4	28.9	46.9	76.5	99.7	50	34.4	63.9	54.2
CAGATCTTGGTGGTAG	48.4	38.5	27.2	14.3	21.8	30.1	47.3	26.5	25.5	26.1	28.6	36.6	44.5	34
TTCAGTGCACTACAGAACTTTGT	58.2	66	22.1	57.2	62.7	61.8	57.8	69.8	38.2	45.7	88.1	77.4	32.3	25.9
ATCTCCAGTAGAACAAAAGGG	36.6	68.7	28.9	23.8	38.2	25.4	55.1	41.4	12.7	31	50	30.1	32.3	26.7
TGTCAGTTTGTCAAATACCCC	80.4	63.2	50.9	47.7	51.8	80.9	55.1	69.8	38.2	45.7	64.3	53.8	62.5	51
ATGAACCGAACGCGAGG	22.9	30.2	18.7	14.3	27.3	28.5	28.9	25.3	12.7	13.1	23.8	30.1	17.2	13
AACGAAAGTTAGGGGATCGAAGACG	45.7	33	34	23.8	40.9	46	42	26.5	12.7	34.3	33.3	40.9	17.9	23.5
TCACAGTGAACCGGTCTCTTTA	42.5	19.2	23.8	9.5	21.8	30.1	23.6	22.2	0	13.1	23.8	28	10.8	7.3
CACCGGGTGTAAAATCAGCTTG	26.1	33	18.7	19.1	16.4	28.5	21	14.8	12.7	26.1	31	21.5	22.3	13
AATGGCGCCACTAGGGTTGT	40.5	46.7	27.2	33.4	46.4	49.2	55.1	49.4	12.7	16.3	28.6	43	20.1	16.2
ACAAGTCAGGCTCTTGGGACCTTT	83	71.5	57.7	62	84.6	92	68.3	83.3	51	47.4	90.5	88.2	31.6	41.3
AACGTGGGCATTCGAATGTATCAACACTAGTGG	14.4	33	17	4.8	16.4	22.2	47.3	13	12.7	19.6	19	36.6	19.4	20.2
TCCCTGGTGGTCTAGTGGTTAGGATTCGGCGCTC	3.3	30.2	28.9	14.3	27.3	23.8	34.1	25.3	0	18	9.5	25.8	18.7	4.9
GGCTGGGCCGATGGTAGTGGGGCATCAGAACA	3.3	5.5	8.5	4.8	0	9.5	10.5	9.9	0	3.3	4.8	12.9	10.1	9.7
CCCACTGAGCGAGGCCAGG	3.3	27.5	57.7	57.2	24.6	30.1	26.3	25.3	63.7	31	26.2	23.7	40.2	34.8
GCTCAAATTTGAAATCTG	3.3	90.7	47.5	47.7	57.3	82.5	49.9	44.4	51	52.3	47.6	58.1	41.6	37.2
AACCTTCCTTGGATGTCTGAGTGA	3.3	22	17	9.5	2.7	9.5	18.4	10.5	0	16.3	21.4	8.6	9.3	5.7
CCCGCCCGTCGCCCGCGCG	3.3	33	44.1	38.2	79.1	49.2	31.5	56.8	51	63.7	47.6	19.4	49.5	46.1
CATGGAATAATAGAATAGGACGTGTGG	3.3	104.5	56	38.2	76.4	68.2	97.2	62.4	76.5	50.6	71.4	83.9	58.9	42.1
AATACAAACCATGAAAGTGTGGCCTATCGATCCTTTAG	3.3	24.7	17	0	27.3	20.6	26.3	9.9	12.7	18	31	21.5	10.8	9.7
CATTGCACTTGTCTCGGTCT	3.3	30.2	28.9	19.1	19.1	34.9	23.6	31.5	0	19.6	21.4	32.3	20.1	15.4
TCTAGCATCGAGCACCCGCCT	3.3	360.1	283.6	224.2	638.4	680.2	517.3	456.2	204	267.9	481	387.2	320.9	378
GGCTGGGCCGATGGTAGTGGGGCATCAAAACT	3.3	0	0	4.8	2.7	6.3	2.6	3.1	0	8.2	9.5	0	4.3	4
AGGATCTGGCGTTGCCG	3.3	16.5	28.9	23.8	51.8	25.4	21	25.3	51	37.6	33.3	19.4	34.5	51.8
CGAAACGGTCCTGTAAG	3.3	41.2	17	9.5	24.6	19	31.5	24.7	12.7	24.5	21.4	23.7	22.3	18.6
TCAGGCTCAGTCCCCTCCCGAT	3.3	33	23.8	14.3	16.4	23.8	34.1	36.4	12.7	11.4	28.6	38.7	14.4	17.8
CTAGACTGAAGCTCCTTGAGGAA	3.3	178.7	230.9	152.6	245.5	293.3	244.2	245.7	12.7	129.1	211.9	197.9	147.2	60.7
TCACAGTGAACCGGTCTCTTT	3.3	357.3	319.2	219.4	392.8	488.4	365	321	331.5	181.4	390.5	318.4	198.2	161.9
AAGGACGTGGCAGCCTGCGAAAAGT	3.3	2.7	0	200.3	330.1	0	0	20.4	153	204.2	71.4	103.3	238.4	107.6
CTCTAGATAGTCAAGTTCTGATCCAG	3.3	88	42.4	28.6	38.2	30.1	39.4	35.2	12.7	16.3	76.2	32.3	25.1	17.8
CAAAGAATTCTCCTTTTGGG	3.3	420.6	560.3	333.9	616.5	524.8	603.9	459.3	178.5	388.8	516.7	539.9	285.7	124.6
TGTGCTACGATCTGCTGAGGTTCAGCCCGTGTTTCAAGATTTG	3.3	35.7	20.4	28.6	8.2	19	55.1	26.5	0	1.6	11.9	40.9	19.4	14.6
GTCCGCGCCCCCTCGCC	3.3	11	15.3	52.5	38.2	22.2	10.5	23.5	63.7	19.6	0	10.8	21.5	13.8
TGCGGCGTGTCCCGTC	3.3	63.2	66.2	109.7	163.7	77.7	91.9	63	178.5	261.4	138.1	105.4	119.2	190.2
CAGTAATGCGTTAAGCTAACTGATACTAATTGCTCGTGCGGCT	3.3	99	66.2	19.1	43.6	28.5	131.3	58	12.7	34.3	61.9	53.8	42.4	51
AGCTCTTTCTTGATTTTGTG	3.3	22	25.5	9.5	21.8	28.5	18.4	21	0	19.6	23.8	25.8	16.5	13.8
CAAAGAATTCTCCTTTTGGGC	3.3	137.4	159.6	109.7	114.6	152.2	147	170.4	38.2	81.7	109.5	124.8	92.6	35.6
AAACTTTCAACAACGGATCTCTTGGTTCTGGCATCGATG	3.3	44	47.5	19.1	19.1	19	26.3	25.3	0	18	35.7	53.8	29.4	21.9
CGAAACGGTCCTGTAAGCAGTAGAG	3.3	46.7	37.4	33.4	21.8	34.9	44.6	29	12.7	22.9	45.2	34.4	15.8	19.4
GATCTCTTGGTTCTGG	3.3	33	23.8	14.3	10.9	17.4	47.3	14.2	0	22.9	31	38.7	15.8	10.5
CACGCTCATGCACACACCCACA	3.3	19.2	20.4	9.5	19.1	30.1	23.6	22.2	25.5	22.9	33.3	21.5	6.5	17
GAGAAAGACATAGTGG	3.3	68.7	115.5	90.6	95.5	60.3	91.9	186.4	114.7	75.2	111.9	144.1	186.7	133.5
ATCACATTGCCAGGGATT	3.3	46.7	64.5	23.8	60	68.2	52.5	62.4	51	42.5	76.2	94.7	52.4	28.3
CCGGTGAGCTCTCGCTGGCC	3.3	27.5	34	23.8	76.4	27	18.4	10.5	38.2	47.4	23.8	8.6	35.9	34.8
GCGCGCGTGCGCGTCGGGT	3.3	5.5	6.8	23.8	13.6	12.7	7.9	16.1	25.5	6.5	4.8	2.2	18.7	25.1
TAGGGGATCGAAGACG	3.3	35.7	25.5	14.3	10.9	20.6	26.3	23.5	12.7	11.4	33.3	23.7	38.8	21.9
GTCTCCAAGGTGAACAGCCTCTG	3.3	66	39.1	38.2	51.8	44.4	68.3	27.8	25.5	26.1	45.2	36.6	29.4	21.9
CGGCGACTCTGGACGCG	3.3	24.7	32.3	66.8	54.6	42.8	31.5	61.1	63.7	45.7	14.3	15.1	40.2	31.6
TTCACCGTGGCTAAGTTCCG	3.3	11	5.1	0	2.7	6.3	10.5	16.1	0	3.3	9.5	23.7	13.6	13.8
TCTCCCGCCCGTCGCCCGCGCG	3.3	11	13.6	33.4	19.1	11.1	10.5	18.5	25.5	21.2	11.9	15.1	22.3	22.7
AGGGGCGGCGCGGGGCGGG	3.3	82.5	57.7	76.3	98.2	57.1	21	40.7	102	83.3	47.6	36.6	59.6	68.8
